# Supplementary material for: Maintenance Treatment With Long-Acting Injectable Antipsychotics for People With Nonaffective Psychoses: A Network Meta-Analysis
Source: Atypon-hosted journal article supplement (doi:10.1176/appi.ajp.2020.20071120), 2021-02-18
Supplement: appi.ajp.2020.20071120.ds001.pdf [file appi.ajp.2020.20071120.ds001.pdf]

Online supplement for Ostuzzi et al., Maintenance Treatment With Long-Acting Injectable Antipsychotics for People With Nonaffective Psychoses: A Network Meta-Analysis. *Am J Psychiatry* (doi: 10.1176/appi.ajp.2020.20071120)

|                      |                                                                                                                                    |        |
|----------------------|------------------------------------------------------------------------------------------------------------------------------------|--------|
| <b>Supplement A.</b> | PRISMA NMA checklist                                                                                                               | p. 2   |
| <b>Supplement B.</b> | Search strategy                                                                                                                    | p. 4   |
| <b>Supplement C.</b> | PRISMA flow-chart                                                                                                                  | p. 6   |
| <b>Supplement D.</b> | List of studies included, excluded, awaiting assessment and ongoing                                                                | p. 7   |
| <b>Supplement E.</b> | Characteristics of included studies                                                                                                | p. 24  |
| <b>Supplement F.</b> | Risk of bias of included studies                                                                                                   | p. 32  |
| <b>Supplement G.</b> | Primary outcome: relapse                                                                                                           | p. 69  |
| <b>Supplement H.</b> | Sensitivity analysis: relapse (excluding trials in which clinicians and participants were not blind to treatment allocation)       | p. 82  |
| <b>Supplement I.</b> | Sensitivity analysis: relapse (excluding trials comparing LAIs with placebo)                                                       | p. 88  |
| <b>Supplement J.</b> | Sensitivity analysis: relapse (excluding trials with less than 50 participants + excluding trials published before 1990)           | p. 93  |
| <b>Supplement K.</b> | Sensitivity analysis: relapse (excluding trials with high risk of bias – three or more RoB items at “high risk”)                   | p. 98  |
| <b>Supplement L.</b> | Primary outcome: acceptability                                                                                                     | p. 104 |
| <b>Supplement M.</b> | Sensitivity analysis: acceptability (excluding trials in which clinicians and participants were not blind to treatment allocation) | p. 118 |
| <b>Supplement N.</b> | Sensitivity analysis: acceptability (excluding trials comparing LAIs with placebo)                                                 | p. 124 |
| <b>Supplement O.</b> | Sensitivity analysis: acceptability (excluding trials with less than 50 participants + excluding trials published before 1990)     | p. 130 |
| <b>Supplement P.</b> | Sensitivity analysis: acceptability (excluding trials with high risk of bias – three or more RoB items at “high risk”)             | p. 135 |
| <b>Supplement Q.</b> | Secondary outcome: tolerability                                                                                                    | p. 142 |
| <b>Supplement R.</b> | Secondary outcome: efficacy (continuous)                                                                                           | p. 148 |
| <b>Supplement S.</b> | Secondary outcome: quality of life (continuous)                                                                                    | p. 155 |
| <b>Supplement T.</b> | Secondary outcome: functioning (continuous)                                                                                        | p. 157 |
| <b>Supplement U.</b> | Secondary outcome: QTc prolongation                                                                                                | p. 159 |
| <b>Supplement V.</b> | Secondary outcome: sedation                                                                                                        | p. 161 |
| <b>Supplement W.</b> | Secondary outcome: hospitalization                                                                                                 | p. 163 |
| <b>Supplement X.</b> | Secondary outcome: weight gain                                                                                                     | p. 166 |
| <b>Supplement Y.</b> | Secondary outcome: hyperprolactaemia                                                                                               | p. 170 |
| <b>Supplement Z.</b> | Secondary outcome: extrapyramidal symptoms                                                                                         | p. 174 |

## Supplement A - PRISMA NMA checklist

| Section/Topic                          | Item #    | Checklist Item                                                                                                                                                                                                                                                                                                                                                                                                                                                                                                                                                                                                                                                                                                                                                                          | Reported on Page # |
|----------------------------------------|-----------|-----------------------------------------------------------------------------------------------------------------------------------------------------------------------------------------------------------------------------------------------------------------------------------------------------------------------------------------------------------------------------------------------------------------------------------------------------------------------------------------------------------------------------------------------------------------------------------------------------------------------------------------------------------------------------------------------------------------------------------------------------------------------------------------|--------------------|
| <b>TITLE</b>                           |           |                                                                                                                                                                                                                                                                                                                                                                                                                                                                                                                                                                                                                                                                                                                                                                                         |                    |
| Title                                  | 1         | Identify the report as a systematic review <i>incorporating a network meta-analysis (or related form of meta-analysis)</i> .                                                                                                                                                                                                                                                                                                                                                                                                                                                                                                                                                                                                                                                            | p. 3               |
| <b>ABSTRACT</b>                        |           |                                                                                                                                                                                                                                                                                                                                                                                                                                                                                                                                                                                                                                                                                                                                                                                         |                    |
| Structured summary                     | 2         | Provide a structured summary including, as applicable:<br><b>Background:</b> main objectives<br><b>Methods:</b> data sources; study eligibility criteria, participants, and interventions; study appraisal; and <i>synthesis methods, such as network meta-analysis</i> .<br><b>Results:</b> number of studies and participants identified; summary estimates with corresponding confidence/credible intervals; <i>treatment rankings may also be discussed. Authors may choose to summarize pairwise comparisons against a chosen treatment included in their analyses for brevity.</i><br><b>Discussion/Conclusions:</b> limitations; conclusions and implications of findings.<br><b>Other:</b> primary source of funding; systematic review registration number with registry name. | p. 6-7             |
| <b>INTRODUCTION</b>                    |           |                                                                                                                                                                                                                                                                                                                                                                                                                                                                                                                                                                                                                                                                                                                                                                                         |                    |
| Rationale                              | 3         | Describe the rationale for the review in the context of what is already known, <i>including mention of why a network meta-analysis has been conducted</i> .                                                                                                                                                                                                                                                                                                                                                                                                                                                                                                                                                                                                                             | p. 8-9             |
| Objectives                             | 4         | Provide an explicit statement of questions being addressed, with reference to participants, interventions, comparisons, outcomes, and study design (PICOS).                                                                                                                                                                                                                                                                                                                                                                                                                                                                                                                                                                                                                             | p. 9               |
| <b>METHODS</b>                         |           |                                                                                                                                                                                                                                                                                                                                                                                                                                                                                                                                                                                                                                                                                                                                                                                         |                    |
| Protocol and registration              | 5         | Indicate whether a review protocol exists and if and where it can be accessed (e.g., Web address); and, if available, provide registration information, including registration number.                                                                                                                                                                                                                                                                                                                                                                                                                                                                                                                                                                                                  | p. 9               |
| Eligibility criteria                   | 6         | Specify study characteristics (e.g., PICOS, length of follow-up) and report characteristics (e.g., years considered, language, publication status) used as criteria for eligibility, giving rationale. <i>Clearly describe eligible treatments included in the treatment network, and note whether any have been clustered or merged into the same node (with justification)</i> .                                                                                                                                                                                                                                                                                                                                                                                                      | p. 10              |
| Information sources                    | 7         | Describe all information sources (e.g., databases with dates of coverage, contact with study authors to identify additional studies) in the search and date last searched.                                                                                                                                                                                                                                                                                                                                                                                                                                                                                                                                                                                                              | p. 10              |
| Search                                 | 8         | Present full electronic search strategy for at least one database, including any limits used, such that it could be repeated.                                                                                                                                                                                                                                                                                                                                                                                                                                                                                                                                                                                                                                                           | Suppl. B           |
| Study selection                        | 9         | State the process for selecting studies (i.e., screening, eligibility, included in systematic review, and, if applicable, included in the meta-analysis).                                                                                                                                                                                                                                                                                                                                                                                                                                                                                                                                                                                                                               | p. 9-11            |
| Data collection process                | 10        | Describe method of data extraction from reports (e.g., piloted forms, independently, in duplicate) and any processes for obtaining and confirming data from investigators.                                                                                                                                                                                                                                                                                                                                                                                                                                                                                                                                                                                                              | p. 9-11            |
| Data items                             | 11        | List and define all variables for which data were sought (e.g., PICOS, funding sources) and any assumptions and simplifications made.                                                                                                                                                                                                                                                                                                                                                                                                                                                                                                                                                                                                                                                   | p. 11-13           |
| <b>Geometry of the network</b>         | <b>51</b> | Describe methods used to explore the geometry of the treatment network under study and potential biases related to it. This should include how the evidence base has been graphically summarized for presentation, and what characteristics were compiled and used to describe the evidence base to readers.                                                                                                                                                                                                                                                                                                                                                                                                                                                                            | p. 11-12           |
| Risk of bias within individual studies | 12        | Describe methods used for assessing risk of bias of individual studies (including specification of whether this was done at the study or outcome level), and how this information is to be used in any data synthesis.                                                                                                                                                                                                                                                                                                                                                                                                                                                                                                                                                                  | p. 13              |
| Summary measures                       | 13        | State the principal summary measures (e.g., risk ratio, difference in means). <i>Also describe the use of additional summary measures assessed, such as treatment rankings and surface under the cumulative ranking curve (SUCRA) values, as well as modified approaches used to present summary findings from meta-analyses.</i>                                                                                                                                                                                                                                                                                                                                                                                                                                                       | p. 11-12           |
| Planned methods of analysis            | 14        | Describe the methods of handling data and combining results of studies for each network meta-analysis. This should include, but not be limited to: <ul style="list-style-type: none"> <li>• <i>Handling of multi-arm trials;</i></li> <li>• <i>Selection of variance structure;</i></li> <li>• <i>Selection of prior distributions in Bayesian analyses; and</i></li> <li>• <i>Assessment of model fit.</i></li> </ul>                                                                                                                                                                                                                                                                                                                                                                  | p. 11-13           |
| <b>Assessment of Inconsistency</b>     | <b>52</b> | Describe the statistical methods used to evaluate the agreement of direct and indirect evidence in the treatment network(s) studied. Describe efforts taken to address its presence when found.                                                                                                                                                                                                                                                                                                                                                                                                                                                                                                                                                                                         | p. 12-13           |
| Risk of bias across studies            | 15        | Specify any assessment of risk of bias that may affect the cumulative evidence (e.g., publication bias, selective reporting within studies).                                                                                                                                                                                                                                                                                                                                                                                                                                                                                                                                                                                                                                            | p. 13              |
| Additional analyses                    | 16        | Describe methods of additional analyses if done, indicating which were pre-specified. This may include, but not be limited to, the following: <ul style="list-style-type: none"> <li>• Sensitivity or subgroup analyses;</li> <li>• Meta-regression analyses;</li> </ul>                                                                                                                                                                                                                                                                                                                                                                                                                                                                                                                | p. 13              |

- *Alternative formulations of the treatment network; and*
- *Use of alternative prior distributions for Bayesian analyses (if applicable).*

## RESULTS†

|                                          |           |                                                                                                                                                                                                                                                                                                                                                                                                                                                              |                                                  |
|------------------------------------------|-----------|--------------------------------------------------------------------------------------------------------------------------------------------------------------------------------------------------------------------------------------------------------------------------------------------------------------------------------------------------------------------------------------------------------------------------------------------------------------|--------------------------------------------------|
| Study selection                          | 17        | Give numbers of studies screened, assessed for eligibility, and included in the review, with reasons for exclusions at each stage, ideally with a flow diagram.                                                                                                                                                                                                                                                                                              | p. 13-14;<br>Suppl. C-D                          |
| <b>Presentation of network structure</b> | <b>S3</b> | Provide a network graph of the included studies to enable visualization of the geometry of the treatment network.                                                                                                                                                                                                                                                                                                                                            | Fig. 1                                           |
| <b>Summary of network geometry</b>       | <b>S4</b> | Provide a brief overview of characteristics of the treatment network. This may include commentary on the abundance of trials and randomized patients for the different interventions and pairwise comparisons in the network, gaps of evidence in the treatment network, and potential biases reflected by the network structure.                                                                                                                            | p. 13-14                                         |
| Study characteristics                    | 18        | For each study, present characteristics for which data were extracted (e.g., study size, PICOS, follow-up period) and provide the citations.                                                                                                                                                                                                                                                                                                                 | Table 1;<br>Suppl. E                             |
| Risk of bias within studies              | 19        | Present data on risk of bias of each study and, if available, any outcome level assessment.                                                                                                                                                                                                                                                                                                                                                                  | Suppl. F                                         |
| Results of individual studies            | 20        | For all outcomes considered (benefits or harms), present, for each study: 1) simple summary data for each intervention group, and 2) effect estimates and confidence intervals. <i>Modified approaches may be needed to deal with information from larger networks.</i>                                                                                                                                                                                      | Suppl. G-Z                                       |
| Synthesis of results                     | 21        | Present results of each meta-analysis done, including confidence/credible intervals. <i>In larger networks, authors may focus on comparisons versus a particular comparator (e.g. placebo or standard care), with full findings presented in an appendix. League tables and forest plots may be considered to summarize pairwise comparisons.</i> If additional summary measures were explored (such as treatment rankings), these should also be presented. | p. 15-19;<br>Fig. 2;<br>Table 2-3;<br>Suppl. G-Z |
| <b>Exploration for inconsistency</b>     | <b>S5</b> | Describe results from investigations of inconsistency. This may include such information as measures of model fit to compare consistency and inconsistency models, <i>P</i> values from statistical tests, or summary of inconsistency estimates from different parts of the treatment network.                                                                                                                                                              | p. 16-20;<br>Suppl. G-Z                          |
| Risk of bias across studies              | 22        | Present results of any assessment of risk of bias across studies for the evidence base being studied.                                                                                                                                                                                                                                                                                                                                                        | Suppl. G and L                                   |
| Results of additional analyses           | 23        | Give results of additional analyses, if done (e.g., sensitivity or subgroup analyses, meta-regression analyses, <i>alternative network geometries studied, alternative choice of prior distributions for Bayesian analyses, and so forth.</i> )                                                                                                                                                                                                              | Suppl. G-P                                       |
| <b>DISCUSSION</b>                        |           |                                                                                                                                                                                                                                                                                                                                                                                                                                                              |                                                  |
| Summary of evidence                      | 24        | Summarize the main findings, including the strength of evidence for each main outcome; consider their relevance to key groups (e.g., healthcare providers, users, and policy-makers).                                                                                                                                                                                                                                                                        | p. 20-21                                         |
| Limitations                              | 25        | Discuss limitations at study and outcome level (e.g., risk of bias), and at review level (e.g., incomplete retrieval of identified research, reporting bias). <i>Comment on the validity of the assumptions, such as transitivity and consistency. Comment on any concerns regarding network geometry (e.g., avoidance of certain comparisons).</i>                                                                                                          | p. 21-22                                         |
| Conclusions                              | 26        | Provide a general interpretation of the results in the context of other evidence, and implications for future research.                                                                                                                                                                                                                                                                                                                                      | p. 20-23                                         |
| <b>FUNDING</b>                           |           |                                                                                                                                                                                                                                                                                                                                                                                                                                                              |                                                  |
| Funding                                  | 27        | Describe sources of funding for the systematic review and other support (e.g., supply of data); role of funders for the systematic review. This should also include information regarding whether funding has been received from manufacturers of treatments in the network and/or whether some of the authors are content experts with professional conflicts of interest that could affect use of treatments in the network.                               | p. 22-23                                         |

PICOS = population, intervention, comparators, outcomes, study design.

\* Text in italics indicates wording specific to reporting of network meta-analyses that has been added to guidance from the PRISMA statement.

† Authors may wish to plan for use of appendices to present all relevant information in full detail for items in this section.

## Supplement B - Search strategy

Last update: June 8<sup>th</sup>, 2020

### PUBMED

((risperidone[Title/Abstract] OR haloperidol[Title/Abstract] OR bromperidol[Title/Abstract] OR fluphenazine[Title/Abstract] OR perphenazine[Title/Abstract] OR pipothiazine[Title/Abstract] OR flupenthixol[Title/Abstract] OR zuclopenthixol[Title/Abstract] OR fluspirilene[Title/Abstract] OR olanzapine[Title/Abstract] OR paliperidone[Title/Abstract] OR aripiprazole[Title/Abstract])) AND (long-acting[Title/Abstract] OR long-acting injectable[Title/Abstract] OR intramuscular[Title/Abstract] OR polymer[Title/Abstract] OR decanoate[Title/Abstract] OR enanthate[Title/Abstract] OR undecylenate[Title/Abstract] OR palmitate[Title/Abstract] OR microsphere[Title/Abstract] OR monohydrate[Title/Abstract] OR pamoate[Title/Abstract] OR acetate[Title/Abstract] OR depot[Title/Abstract] OR inject\*[Title/Abstract] OR "Delayed-Action Preparations"[Mesh]) AND (Randomized controlled trial[Title/Abstract] OR controlled clinical trial[Title/Abstract] OR random\*[Title/Abstract] OR "Randomized Controlled Trial"[Publication Type])

### PsycINFO (database platform: HEBSCOHost)

ab(risperidone OR haloperidol OR bromperidol OR fluphenazine OR perphenazine OR pipothiazine OR flupenthixol OR zuclopenthixol OR fluspirilene OR olanzapine OR paliperidone OR aripiprazole) AND ab(long-acting OR long-acting injectable OR intramuscular OR polymer OR decanoate OR enanthate OR undecylenate OR palmitate OR microsphere OR monohydrate OR pamoate OR acetate OR depot OR inject\*) AND ab(Randomized controlled trial OR controlled clinical trial OR random\*)

### Cochrane Central Register of Controlled Trials (CENTRAL) (database platform: Ovid)

risperidone OR haloperidol OR bromperidol OR fluphenazine OR perphenazine OR pipothiazine OR flupenthixol OR zuclopenthixol OR fluspirilene OR olanzapine OR paliperidone OR aripiprazole

*in Title, Abstract, Keywords*

AND

long-acting OR long-acting injectable OR intramuscular OR polymer OR decanoate OR enanthate OR undecylenate OR palmitate OR microsphere OR monohydrate OR pamoate OR acetate OR depot OR inject\*

*in Title, Abstract, Keywords*

AND

Randomized controlled trial OR controlled clinical trial OR random\*

*in Title, Abstract, Keywords*

### MEDLINE (database platform: HEBSCOHost)

# 4 #3 AND #2 AND #1

*Indexes=MEDLINE Timespan=All years*

# 3 TI=(Randomized controlled trial OR controlled clinical trial OR random\*) OR TS=(Randomized controlled trial OR controlled clinical trial OR random\*)

*Indexes=MEDLINE Timespan=All years*

# 2 TI=(long-acting OR long-acting injectable OR intramuscular OR polymer OR decanoate OR enanthate OR undecylenate OR palmitate OR microsphere OR monohydrate OR pamoate OR acetate OR depot OR inject\*) OR TS=(long-acting OR long-acting injectable OR intramuscular OR polymer OR decanoate OR enanthate OR undecylenate OR palmitate OR microsphere OR monohydrate OR pamoate OR acetate OR depot OR inject\*)

*Indexes=MEDLINE Timespan=All years*

# 1 TI=(risperidone OR haloperidol OR bromperidol OR fluphenazine OR perphenazine OR pipothiazine OR flupenthixol OR zuclopenthixol OR fluspirilene OR olanzapine OR paliperidone OR aripiprazole) OR TS=(risperidone OR haloperidol OR bromperidol OR fluphenazine OR perphenazine OR pipothiazine OR flupenthixol OR zuclopenthixol OR fluspirilene OR olanzapine OR paliperidone OR aripiprazole)

*Indexes=MEDLINE Timespan=All years*

### EMBASE (database platform: OvidSP)

#4 #1 AND #2 AND #3

#3 randomized AND controlled AND trial:ab,ti OR controlled AND clinical AND trial:ab,ti OR random\*:ab,ti

#2 'long acting':ab,ti OR 'long acting' AND injectable:ab,ti OR intramuscular:ab,ti OR polymer:ab,ti OR decanoate:ab,ti OR enanthate:ab,ti OR undecylenate:ab,ti OR palmitate:ab,ti OR microsphere:ab,ti OR monohydrate:ab,ti OR pamoate:ab,ti OR acetate:ab,ti OR depot:ab,ti OR inject\*:ab,ti

#1 risperidone:ab,ti OR haloperidol:ab,ti OR bromperidol:ab,ti OR fluphenazine:ab,ti OR perphenazine:ab,ti OR pipothiazine:ab,ti OR flupenthixol:ab,ti OR zuclopenthixol:ab,ti OR fluspirilene:ab,ti OR olanzapine:ab,ti OR paliperidone:ab,ti OR aripiprazole:ab,t

#### Web of Science Core Collection

# 4 #3 AND #2 AND #1

*Indexes=SCI-EXPANDED, SSCI, A&HCI, CPCI-S, CPCI-SSH, ESCI Timespan=All years*

# 3 TI=(risperidone OR haloperidol OR bromperidol OR fluphenazine OR perphenazine OR pipothiazine OR flupenthixol OR zuclopenthixol OR fluspirilene OR olanzapine OR paliperidone OR aripiprazole) OR TS=(risperidone OR haloperidol OR bromperidol OR fluphenazine OR perphenazine OR pipothiazine OR flupenthixol OR zuclopenthixol OR fluspirilene OR olanzapine OR paliperidone OR aripiprazole)

*Indexes=SCI-EXPANDED, SSCI, A&HCI, CPCI-S, CPCI-SSH, ESCI Timespan=All years*

# 2 TI=(long-acting OR long-acting injectable OR intramuscular OR polymer OR decanoate OR enanthate OR undecylenate OR palmitate OR microsphere OR monohydrate OR pamoate OR acetate OR depot OR inject\*) OR TS=(long-acting OR long-acting injectable OR intramuscular OR polymer OR decanoate OR enanthate OR undecylenate OR palmitate OR microsphere OR monohydrate OR pamoate OR acetate OR depot OR inject\*)

*Indexes=SCI-EXPANDED, SSCI, A&HCI, CPCI-S, CPCI-SSH, ESCI Timespan=All years*

# 1 TI=(Randomized controlled trial OR controlled clinical trial OR random\*) OR TS=(Randomized controlled trial OR controlled clinical trial OR random\*)

*Indexes=SCI-EXPANDED, SSCI, A&HCI, CPCI-S, CPCI-SSH, ESCI Timespan=All years*

#### CINAHL Complete

AB (risperidone OR haloperidol OR bromperidol OR fluphenazine OR perphenazine OR pipothiazine OR flupenthixol OR zuclopenthixol OR fluspirilene OR olanzapine OR paliperidone OR aripiprazole) AND AB (long-acting OR long-acting injectable OR intramuscular OR polymer OR decanoate OR enanthate OR undecylenate OR palmitate OR microsphere OR monohydrate OR pamoate OR acetate OR depot OR inject\*) AND AB (Randomized controlled trial OR controlled clinical trial OR random\*)

## Supplement C - PRISMA flow-chart

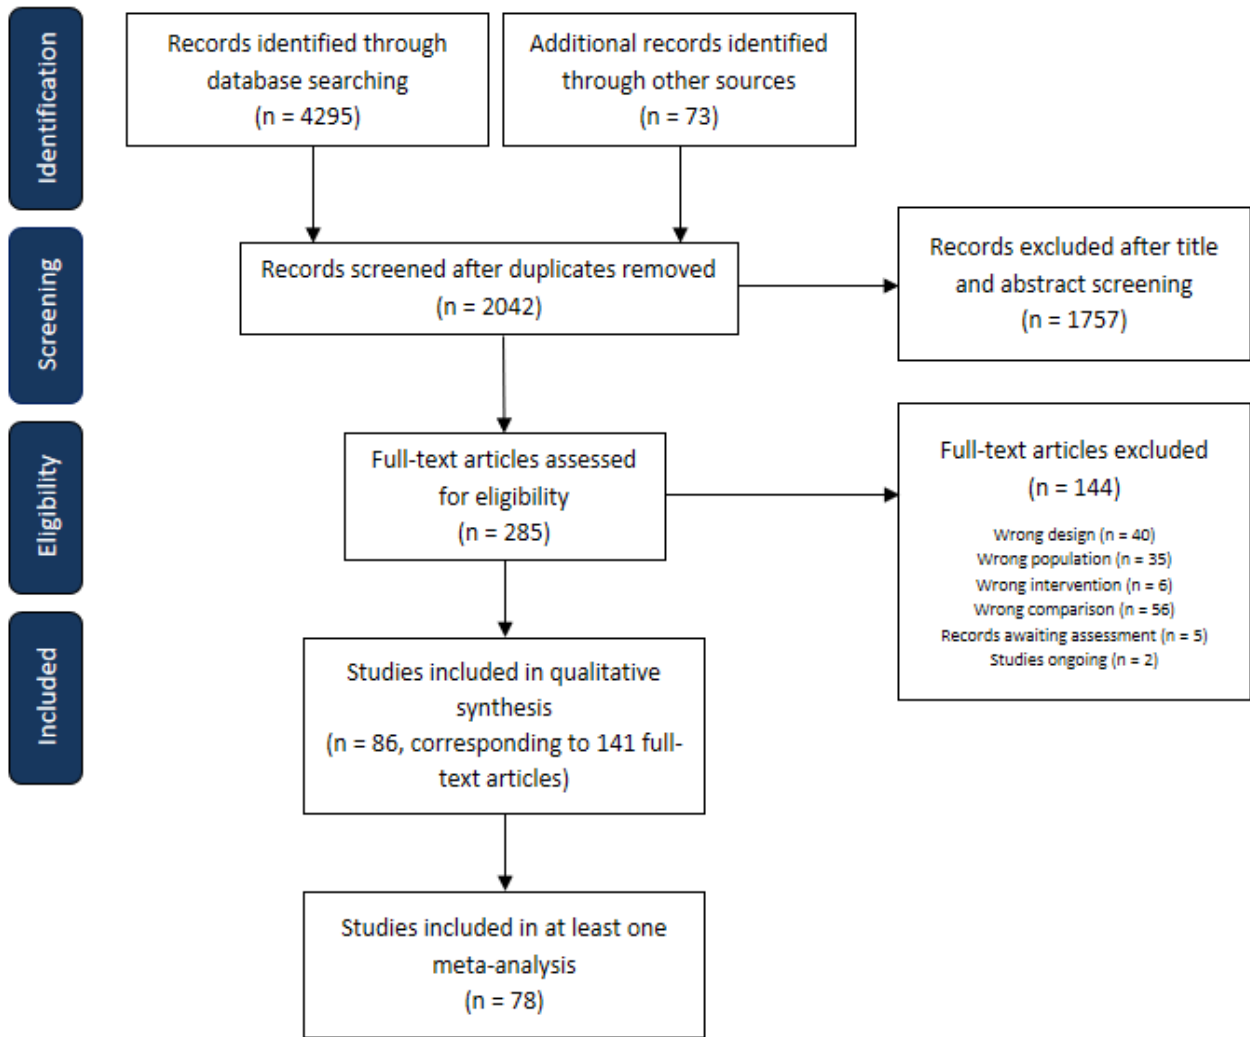

## Supplement D - List of studies included, excluded, awaiting assessment and ongoing

### List of included studies

|     |                                                                                                                                                                                                                                                                                                                   |                                         |
|-----|-------------------------------------------------------------------------------------------------------------------------------------------------------------------------------------------------------------------------------------------------------------------------------------------------------------------|-----------------------------------------|
| 1.  | Albert et al. Long term double-blind evaluation of pipotiazine palmitate and fluphenazine decanoate. <i>Current Therapeutic Research</i> 1980;27(6):897-907.                                                                                                                                                      | <b>PRIMARY PUBLICATION</b>              |
| 2.  | Bai et al. Equivalent switching dose from oral risperidone to risperidone long-acting injection: a 48-week randomized, prospective, single-blind pharmacokinetic study. <i>J Clin Psychiatry</i> 2007;68(8): 1218-1225.                                                                                           | <b>PRIMARY PUBLICATION</b>              |
| 3.  | Bai et al. A comparative efficacy and safety study of long-acting risperidone injection and risperidone oral tablets among hospitalized patients: 12-week randomized, single-blind study. <i>Pharmacopsychiatry</i> 2006;39(4): 135-141.                                                                          | SECONDARY PUBLICATION of Bai 2007       |
| 4.  | Barnes et al. Use of the Social Behaviour Assessment Schedule (SBAS) in a trial of maintenance antipsychotic therapy in schizophrenic outpatients: pimozide versus fluphenazine. <i>Soc Psychiatry.</i> 1983;18(4):193-199. doi:10.1007/BF00583530                                                                | <b>PRIMARY PUBLICATION</b>              |
| 5.  | Bechelli et al. A double-blind trial of haloperidol decanoate and pipothiazine palmitate in the maintenance treatment of schizophrenics in a public out-patient clinic. <i>Current Therapeutic Research</i> 1985;37(4): 662-671.                                                                                  | <b>PRIMARY PUBLICATION</b>              |
| 6.  | Berwaerts et al. Efficacy and Safety of the 3-Month Formulation of Paliperidone Palmitate vs. Placebo for Relapse Prevention of Schizophrenia: A Randomized Clinical Trial. <i>JAMA Psychiatry</i> 2015; 72: 830-839 DOI: 10.1001/jamapsychiatry.2015.0241. clinicaltrials.gov ID: NCT01529515                    | <b>PRIMARY PUBLICATION</b>              |
| 7.  | Benson et al. Health resource use and cost analysis of Schizophrenia patients participating in a Randomized, Multicenter, Double-Blind, relapse prevention study of paliperidone palmitate 3-month formulation. <i>Value in Health.</i> 2015;18(3):A119.                                                          | Secondary publication of Berwaerts 2015 |
| 8.  | Bell Lynum et al. Paliperidone palmitate once-every-3-months in adults with early illness schizophrenia. <i>Early Interv Psychiatry.</i> 2019;13(3):667-672. doi:10.1111/eip.12685                                                                                                                                | Secondary publication of Berwaerts 2015 |
| 9.  | Bozzatello et al. Effects on Satisfaction and Service Engagement of Paliperidone Palmitate Compared with Oral Paliperidone in Patients with Schizophrenia: An Open Label Randomized Controlled Trial. <i>Clin Drug Investig.</i> 2019;39(2):169-178. doi: 10.1007/s40261-018-0734-1.                              | <b>PRIMARY PUBLICATION</b>              |
| 10. | Chai XS, Wang JH, Liu XY, Ju HZ, Yu JL, Wang WW, Liang CS, Pang DJ, Zhang SJ, Zhang SL, Zhang DP, Zhao JT, Weng Z. A comparison trial of pipotiazine palmitate, haloperidol decanoate and flupenthixol decanoate in treatment of schizophrenic patients. <i>Chinese Journal of Psychiatry</i> 1998;31(4): 218–21. | <b>PRIMARY PUBLICATION</b>              |
| 11. | Chouinard G, Annable L, Kropsky M. A double-blind controlled study of pipothiazine palmitate in the maintenance treatment of schizophrenic outpatients. <i>J Clin Pharmacol.</i> 1978;18(2-3):148-154. doi:10.1002/j.1552-4604.1978.tb02436.x                                                                     | <b>PRIMARY PUBLICATION</b>              |
| 12. | Chouinard et al. A double-blind, controlled clinical trial of haloperidol decanoate and fluphenazine decanoate in the maintenance treatment of schizophrenia. <i>Psychopharmacology Bulletin</i> 1984;20(1): 108-109.                                                                                             | <b>PRIMARY PUBLICATION</b>              |
| 13. | Chowdhury ME, Chacon C. Depot fluphenazine and flupenthixol in the treatment of stabilized schizophrenics. A double-blind comparative trial. <i>Compr Psychiatry.</i> 1980;21(2):135-139. doi:10.1016/0010-440x(80)90090-5                                                                                        | <b>PRIMARY PUBLICATION</b>              |
| 14. | Chue et al. Comparative efficacy and safety of long-acting risperidone and risperidone oral tablets. <i>Eur Neuropsychopharmacol</i> 2005;15(1): 111-117.                                                                                                                                                         | <b>PRIMARY PUBLICATION</b>              |
| 15. | Cookson et al. Weight gain and prolactin levels in patients on long-term antipsychotic medication: a double-blind comparative trial of haloperidol decanoate and fluphenazine decanoate. <i>Int Clin Psychopharmacol</i> 1986;1(Suppl 1):41-51                                                                    | <b>PRIMARY PUBLICATION</b>              |

|     |                                                                                                                                                                                                                                                                                                                         |                                       |
|-----|-------------------------------------------------------------------------------------------------------------------------------------------------------------------------------------------------------------------------------------------------------------------------------------------------------------------------|---------------------------------------|
| 16. | Crawford R, Forrest A. Controlled trial of depot fluphenazine in out-patient schizophrenics. The British journal of psychiatry : the journal of mental science 1974;124(0): 385-391.                                                                                                                                    | <b>PRIMARY PUBLICATION</b>            |
| 17. | Cuomo et al. Head-to-head comparison of 1-year aripiprazole long-acting injectable (LAI) versus paliperidone LAI in comorbid psychosis and substance use disorder: impact on clinical status, substance craving, and quality of life. <i>Neuropsychiatr Dis Treat.</i> 2018;21(14):1645-1656. doi: 10.2147/NDT.S171002. | <b>PRIMARY PUBLICATION</b>            |
| 18. | Del Giudice et al. Prevention of recidivism of schizophrenics treated with fluphenazine enanthate. <i>Psychosomatics</i> 1975;16: 32-36. (HANDSEARCHED)                                                                                                                                                                 | <b>PRIMARY PUBLICATION</b>            |
| 19. | Detke et al. Comparison of olanzapine long-acting injection and oral olanzapine: a 2-year, randomized, open-label study in outpatients with schizophrenia. <i>J Clin Psychopharmacol</i> 2014;34(4): 426-434.                                                                                                           | <b>PRIMARY PUBLICATION</b>            |
| 20. | Detke et al. Dose correspondence between olanzapine long-acting injection and oral olanzapine: recommendations for switching. <i>Int Clin Psychopharmacol</i> 2011;26(1): 35-42.                                                                                                                                        | SECONDARY PUBLICATION of Detke 2014   |
| 21. | Detke et al. Open-label comparison of olanzapine long-acting injection and oral olanzapine: a 2-year, randomized study in outpatients with schizophrenia. <i>Schizophrenia Bulletin</i> 2011;37: 300-300.                                                                                                               | SECONDARY PUBLICATION of Detke 2014   |
| 22. | Detke et al. Efficacy and safety of olanzapine long-acting injection for maintenance treatment of schizophrenia. <i>European Neuropsychopharmacology</i> 2008;18(S4): S393-S394.                                                                                                                                        | SECONDARY PUBLICATION of Detke 2014   |
| 23. | Detke et al. Olanzapine long-acting injection in patients with schizophrenia at risk of relapse: 12-week switching data. <i>European Neuropsychopharmacology</i> 2008;18(S4): S435.                                                                                                                                     | SECONDARY PUBLICATION of Detke 2014   |
| 24. | Novick et al. Olanzapine long-acting injection for schizophrenia: An evaluation of patient functioning during 24 weeks of maintenance therapy. <i>Value in health</i> 2011;14(7): A287.                                                                                                                                 | SECONDARY PUBLICATION of Detke 2014   |
| 25. | Novick et al. Risk of relapse and hospitalization in the 2-year open-label treatment of outpatients with schizophrenia randomized to olanzapine long-acting injection or oral olanzapine. <i>Value in Health</i> 2011;14(7): a288-a289.                                                                                 | SECONDARY PUBLICATION of Detke 2014   |
| 26. | Novick et al. Risk of relapse and hospitalization in the 2-year open-label treatment of outpatients with schizophrenia randomized to olanzapine long-acting injection or oral olanzapine. <i>Schizophrenia Research</i> 2012;136: S357.                                                                                 | SECONDARY PUBLICATION of Detke 2014   |
| 27. | Detke et al. Olanzapine long-acting injection vs oral olanzapine in schizophrenia outpatients: a 2-year, randomized, open-label study. <i>European Neuropsychopharmacology</i> 2010;20: S464-S464.                                                                                                                      | SECONDARY PUBLICATION of Detke 2014   |
| 28. | Dencker SJ, Frankenberg K, Malm U, Zell B. A controlled one-year study of pipotiazine palmitate and fluphenazine decanoate in chronic schizophrenic syndromes. Evaluation of results at 6 and 12 months' trial. <i>Acta Psychiatr Scand Suppl.</i> 1973;241:101-118. doi:10.1111/j.1600-0447.1973.tb07048.x             | <b>PRIMARY PUBLICATION</b>            |
| 29. | Dencker et al. How schizophrenic patients change during 3 years' treatment with depot neuroleptics. <i>Acta Psychiatr Scand.</i> 1978;57(2):115-123. doi:10.1111/j.1600-0447.1978.tb06879.x                                                                                                                             | SECONDARY PUBLICATION of Dencker 1973 |
| 30. | Dencker SJ, Lepp M, Malm U. Clopenthixol and flupenthixol depot preparations in outpatient schizophrenics. I. A one year double-blind study of clopenthixol decanoate and flupenthixol palmitate. <i>Acta Psychiatr Scand Suppl.</i> 1980;279:10-28. doi:10.1111/j.1600-0447.1980.tb07080.x                             | <b>PRIMARY PUBLICATION</b>            |
| 31. | Dencker SJ, Frankenberg K, Hansen V, Malm U. Clopenthixol and flupenthixol depot preparations in outpatient schizophrenics. II. Factor analysis of the CPRS sub-scale for schizophrenia. <i>Acta Psychiatr Scand Suppl.</i> 1980;279:29-40. doi:10.1111/j.1600-0447.1980.tb07081.x                                      | SECONDARY PUBLICATION of Dencker 1980 |
| 32. | Jrgensen A, Overø KF. Clopenthixol and flupenthixol depot preparations in outpatient schizophrenics. III. Serum levels. <i>Acta Psychiatr Scand Suppl.</i> 1980;279:41-54. doi:10.1111/j.1600-0447.1980.tb07082.x                                                                                                       | SECONDARY PUBLICATION of Dencker 1980 |



|     |                                                                                                                                                                                                                                                                                                                                         |                                             |
|-----|-----------------------------------------------------------------------------------------------------------------------------------------------------------------------------------------------------------------------------------------------------------------------------------------------------------------------------------------|---------------------------------------------|
| 33. | Dencker SJ, Malm U, Jørgensen A, Overø KF. Clopenthixol and flupenthixol depot preparations in outpatient schizophrenics. IV. Serum levels and clinical outcome. <i>Acta Psychiatr Scand Suppl.</i> 1980;279:55-63. doi:10.1111/j.1600-0447.1980.tb07083.x                                                                              | SECONDARY PUBLICATION of Dencker 1980       |
| 34. | Dencker et al. A long-term cross-over pharmacokinetic study comparing perphenazine decanoate and haloperidol decanoate in schizophrenic patients. <i>Psychopharmacology (Berl)</i> . 1994;114(1):24-30. doi:10.1007/BF02245440                                                                                                          | PRIMARY PUBLICATION                         |
| 35. | Dotti et al. Double-blind trial of fluphenazine decanoate against placebo in ambulant maintenance treatment of chronic schizophrenics [Studio in doppio cieco della flufenazina decanoato versus placebo nella terapia ambulatoriale di mantenimento di pazienti schizofrenici cronici]. <i>Rivista di Psichiatria</i> 1979;14: 374–83. | PRIMARY PUBLICATION                         |
| 36. | Eberhard G, Hellbom E. Haloperidol decanoate and flupenthixol decanoate in schizophrenia. A long-term double-blind cross-over comparison. <i>Acta Psychiatr Scand</i> 1986;74(3):255-262.                                                                                                                                               | PRIMARY PUBLICATION                         |
| 37. | Eklund K, Forsman A. Minimal effective dose and relapse--double-blind trial: haloperidol decanoate vs. placebo. <i>Clin Neuropharmacol</i> 1991;14 Suppl 2:S7-12; discussion S12-5                                                                                                                                                      | PRIMARY PUBLICATION                         |
| 38. | Eufe R, Wegener G. Double-blind comparison of 2 depot neuroleptics (perphenazine enanthate and flupenthixol decanoate) in chronic schizophrenia (author's transl) [Doppelblindvergleich von 2 depotneuroleptika (Perphenazinonanthat und flupenthixol-decaoat bei chronischer schizoprenie)]. <i>Nervenarzt</i> 1979;50:534-9           | PRIMARY PUBLICATION                         |
| 39. | Feng L. Double blind controlled trial of haloperidol decanoate and fluphenazine decanoate in chronic schizophrenia. <i>Chinese Journal of Nervous and Mental Disorders</i> 1990;16(5):299.                                                                                                                                              | PRIMARY PUBLICATION                         |
| 40. | Fleischhacker et al. Aripiprazole once-monthly for treatment of schizophrenia: double-blind, randomised, non-inferiority study. <i>Br J Psychiatry</i> 2014; 205(2): 135-144. Protocol ID: 2008-002676-10                                                                                                                               | PRIMARY PUBLICATION                         |
| 41. | Fleischhacker et al. Aripiprazole Once-monthly for the Treatment of Schizophrenia: A Double-blind, Randomized, Non-inferiority Study vs. Oral Aripiprazole. <i>Neuropsychopharmacology</i> 2012;38, S339                                                                                                                                | SECONDARY PUBLICATION of Fleischhacker 2014 |
| 42. | Fleischhacker et al. Aripiprazole once-monthly for the treatment of schizophrenia: A double-blind, randomized, noninferiority study versus oral aripiprazole. <i>CNS Spectrums</i> 2013;18, 376                                                                                                                                         | SECONDARY PUBLICATION of Fleischhacker 2014 |
| 43. | Fleischhacker et al. Personal and social performance in schizophrenia: Double-blind, non-inferiority study of once-monthly vs oral aripiprazole. <i>European Neuropsychopharmacology</i> 2013;23,S474-s475                                                                                                                              | SECONDARY PUBLICATION of Fleischhacker 2014 |
| 44. | Fleischhacker et al. Long-term safety and tolerability of aripiprazole once-monthly in maintenance treatment of patients with schizophrenia. <i>Int Clin Psychopharmacol</i> 2013;28(4):171-176.                                                                                                                                        | SECONDARY PUBLICATION of Fleischhacker 2014 |
| 45. | Peters-Strickland et al. Aripiprazole once-monthly for schizophrenia: A double-blind, randomised, non-inferiority study versus oral aripiprazole. <i>European Neuropsychopharmacology</i> 2013;23:S473-S474.                                                                                                                            | SECONDARY PUBLICATION of Fleischhacker 2014 |
| 46. | Peters-Strickland et al. The effect of aripiprazole once-monthly on personal and social functioning: post hoc analyses of acute and long-term studies. <i>Neuropsychiatr Dis Treat.</i> 2019;15:1659-1669. Published 2019 Jun 24. doi:10.2147/NDT.S198241                                                                               | SECONDARY PUBLICATION of Fleischhacker 2014 |
| 47. | Fu et al. Paliperidone palmitate once-monthly reduces risk of relapse of psychotic, depressive, and manic symptoms and maintains functioning in a double-blind, randomized study of schizoaffective disorder. <i>J Clin Psychiatry</i> 2015;76(3):253-62                                                                                | PRIMARY PUBLICATION                         |
| 48. | Joshi et al. Medical cost-offset of once-monthly paliperidone palmitate monotherapy and adjunctive therapy in 15-month trial. <i>Value in health</i> 2015;18, A121                                                                                                                                                                      | SECONDARY PUBLICATION of Fu 2015            |
| 49. | Gaebel et al. Relapse prevention in schizophrenia and schizoaffective disorder with risperidone long-acting injectable vs quetiapine: results of a long-term, open-label, randomized clinical trial. <i>Neuropsychopharmacology</i> 2010;35(12):2367-77                                                                                 | PRIMARY PUBLICATION                         |

|     |                                                                                                                                                                                                                                                                                                                                                          |                                                            |
|-----|----------------------------------------------------------------------------------------------------------------------------------------------------------------------------------------------------------------------------------------------------------------------------------------------------------------------------------------------------------|------------------------------------------------------------|
| 50. | Gitlin et al. Persistence of fluphenazine in plasma after decanoate withdrawal. <i>J Clin Psychopharmacol.</i> 1988;8(1):53-56.                                                                                                                                                                                                                          | <b>PRIMARY PUBLICATION</b>                                 |
| 51. | Gitlin et al. Clinical outcome following neuroleptic discontinuation in patients with remitted recent-onset schizophrenia. <i>Am J Psychiatry.</i> 2001;158(11):1835-1842. doi:10.1176/appi.ajp.158.11.1835                                                                                                                                              | <b>PRIMARY PUBLICATION</b>                                 |
| 52. | Glick ID, Marder SR. Long-term maintenance therapy with quetiapine versus haloperidol decanoate in patients with schizophrenia or schizoaffective disorder. <i>J Clin Psychiatry</i> 2005;66(5):638-41                                                                                                                                                   | <b>PRIMARY PUBLICATION</b>                                 |
| 53. | Green et al. Long-acting injectable vs oral risperidone for schizophrenia and co-occurring alcohol use disorder: a randomized trial. <i>Journal of Clinical Psychiatry</i> 2015;76:1359-1365.                                                                                                                                                            | <b>PRIMARY PUBLICATION</b>                                 |
| 54. | Hirsch SR et al. Maintenance Therapy in Out-patient Schizophrenics: a report of a double-blind trial comparison of fluphenazine decanoate and flupenthixol decanoate. <i>British Journal of Psychiatry</i> 1978;133:370-1 (Abstract of some of the papers given at the Annual Meeting of the Royal College of Psychiatrists in London on 4-6 July 1978). | <b>PRIMARY PUBLICATION</b>                                 |
| 55. | Hirsch et al. Outpatient maintenance of chronic schizophrenic patients with long-acting fluphenazine: double-blind placebo trial. Report to the Medical Research Council Committee on Clinical Trials in Psychiatry. <i>Br Med J.</i> 1973 Mar 17;1(5854):633-7.                                                                                         | <b>PRIMARY PUBLICATION</b>                                 |
| 56. | Hirsch SR. The interaction between depot-phenothiazines and the social and clinical manifestations of behaviour in patients with stabilised chronic schizophrenia. In: Van Praag HM editor(s). <i>On the Origin of Schizophrenic Psychoses.</i> De Erven Bohn BV, 1975:209-22.                                                                           | SECONDARY PUBLICATION of Hirsch 1973                       |
| 57. | Hogarty et al. Fluphenazine and social therapy in the aftercare of schizophrenic patients. Relapse analyses of a two-year controlled study of fluphenazine decanoate and fluphenazine hydrochloride. <i>Archives of General Psychiatry</i> 1979;36(12):1283-1294                                                                                         | <b>PRIMARY PUBLICATION</b>                                 |
| 58. | Hough et al. Paliperidone palmitate maintenance treatment in delaying the time-to-relapse in patients with schizophrenia: a randomized, double-blind, placebo-controlled study. <i>Schizophr Res</i> 2010;116(2-3):107-17.                                                                                                                               | <b>PRIMARY PUBLICATION</b>                                 |
| 59. | Hough et al. Paliperidone palmitate, an injectable antipsychotic, in prevention of symptom recurrence in patients with schizophrenia: A randomized, double-blind, placebo-controlled study. <i>Biological Psychiatry</i> 2008;63(7): 2855-2865.                                                                                                          | SECONDARY PUBLICATION of Hough 2010                        |
| 60. | Hranov et al. Haloperidol decanoate and fluphenazine decanoate for schizophrenia: A comparative naturalistic medium-term study of efficacy and tolerability. <i>European Neuropsychopharmacology</i> 1998;P.2.008:s213. DOI:10.1016/S0924-977X(98)80340-4                                                                                                | <b>PRIMARY PUBLICATION</b>                                 |
| 61. | Ishigooka et al. Efficacy and safety of aripiprazole once-monthly in Asian patients with schizophrenia: a multicenter, randomized, double-blind, non-inferiority study versus oral aripiprazole. <i>Schizophr Res</i> 2015;161(2-3): 421-428.                                                                                                            | <b>PRIMARY PUBLICATION</b>                                 |
| 62. | Ishigooka et al. Efficacy of aripiprazole once-monthly in Asian patients with schizophrenia: Secondary efficacy outcomes in a multicenter, randomized, double-blind, non-inferiority study versus oral aripiprazole. <i>International Journal of Neuropsychopharmacology</i> 2014;17, 62.                                                                | SECONDARY PUBLICATION of Ishigooka 2015                    |
| 63. | Jain RC, Ananth JV, Lehmann HE, Ban TA. A comparative study with pipothiazine palmitate and fluphenazine enanthate in the treatment of schizophrenic patients. <i>Current Therapeutic Research</i> 1975;18(4):585-9.                                                                                                                                     | <b>PRIMARY PUBLICATION</b>                                 |
| 64. | Janssen Korea, Ltd. NCT00992407. An Efficacy and Safety Study of Long Acting Injectable Risperidone and Oral Risperidone in Participants With Schizophrenia or Schizoaffective Disorder. Last Update Posted: March 11, 2014 (HANDSEARCHED)                                                                                                               | <b>PRIMARY PUBLICATION.</b><br>Only online data available. |
| 65. | Javed MA, Chaudhry MR. Double blind comparison of flupenthixol decanoate and fluphenazine decanoate in the treatment of chronic schizophrenia. <i>Pakistan Journal of Clinical Psychiatry</i> 1991;1(2):69-74.                                                                                                                                           | <b>PRIMARY PUBLICATION</b>                                 |

|     |                                                                                                                                                                                                                                                                                                                                                                                                                                                                                       |                                         |
|-----|---------------------------------------------------------------------------------------------------------------------------------------------------------------------------------------------------------------------------------------------------------------------------------------------------------------------------------------------------------------------------------------------------------------------------------------------------------------------------------------|-----------------------------------------|
| 66. | Jolley et al. Trial of brief intermittent neuroleptic prophylaxis for selected schizophrenic outpatients: clinical and social outcome at two years. <i>BMJ</i> 1990;301(6756):837-42.                                                                                                                                                                                                                                                                                                 | <b>PRIMARY PUBLICATION</b>              |
| 67. | Hirsch SR, Jolley AG. The dysphoric syndrome in schizophrenia and its implications for relapse. <i>Br J Psychiatry Suppl.</i> 1989;(5):46-50.                                                                                                                                                                                                                                                                                                                                         | SECONDARY PUBLICATION of Jolley 1990    |
| 68. | Kamijima et al. Comparison study between risperidone long-acting injectable and risperidone tablets in patients with schizophrenia. <i>Jpn J Clin Psychopharmacol.</i> 2009; 12: 1199–1222.<br>Data were extracted from the report linked to the protocol NCT00240708. A Study of the Efficacy and Safety of Long-acting Injectable Risperidone and Risperidone Tablets in Patients With Schizophrenia. Last Update Posted: May 17, 2011. The original publication was not retrieved. | <b>PRIMARY PUBLICATION</b>              |
| 69. | Kane et al. Long-acting injectable risperidone: efficacy and safety of the first long-acting atypical antipsychotic. <i>Am J Psychiatry</i> 2003;160(6):1125-32.                                                                                                                                                                                                                                                                                                                      | <b>PRIMARY PUBLICATION</b>              |
| 70. | Kane et al. Olanzapine long-acting injection: a 24-week, randomized, double-blind trial of maintenance treatment in patients with schizophrenia. <i>Am J Psychiatry</i> 2010;167(2): 181-189.<br>Clinicaltrials.gov: NCT00088491                                                                                                                                                                                                                                                      | <b>PRIMARY PUBLICATION</b>              |
| 71. | Erratum: Comparison of metabolic changes in patients with schizophrenia during randomized treatment with intramuscular olanzapine long-acting injection versus oral olanzapine ( <i>Human Psychopharmacology</i> (2011) 26 (422-433) DOI: 10.1002/hup.1225). <i>Human psychopharmacology</i> 2011;26(7): 536.                                                                                                                                                                         | SECONDARY PUBLICATION of Kane 2010      |
| 72. | McDonnell et al. Comparison of metabolic changes in patients with schizophrenia during randomized treatment with intramuscular olanzapine long-acting injection versus oral olanzapine. <i>Hum Psychopharmacol</i> 2011; 26(6): 422-433.                                                                                                                                                                                                                                              | SECONDARY PUBLICATION of Kane 2010      |
| 73. | Detke et al. Olanzapine long-acting injection for the maintenance treatment of schizophrenia: A 24-week, randomized, double-blind trial. <i>Schizophrenia Research</i> 2008;102(1):251-251.                                                                                                                                                                                                                                                                                           | SECONDARY PUBLICATION of Kane 2010      |
| 74. | Kane et al. Low dose fluphenazine decanoate in maintenance treatment of schizophrenia. <i>Psychiatry Res.</i> 1979;1(3):341-348. doi:10.1016/0165-1781(79)90016-7                                                                                                                                                                                                                                                                                                                     | <b>PRIMARY PUBLICATION</b>              |
| 75. | Kane et al. Aripiprazole intramuscular depot as maintenance treatment in patients with schizophrenia: a 52-week, multicenter, randomized, double-blind, placebo-controlled study. <i>J Clin Psychiatry</i> 2012;73(5):617-24.                                                                                                                                                                                                                                                         | <b>PRIMARY PUBLICATION</b>              |
| 76. | Kaneno et al. A Double-blind Comparative Study on the Efficacy and Safety of Fluphenazine Decanoate (SQ10, 733) and Oral Haloperidol in the Treatment of Schizophrenic Patients. <i>Clinical Evaluation</i> 1991;19(1):15-45. Link:<br><a href="https://jglobal.jst.go.jp/en/detail?JGLOBAL_ID=200902044881238461&amp;rel=0">https://jglobal.jst.go.jp/en/detail?JGLOBAL_ID=200902044881238461&amp;rel=0</a>                                                                          | <b>PRIMARY PUBLICATION</b>              |
| 77. | Kelly HB et al. Clinical and social comparison of fluphenazine decanoate and flupenthixol decanoate in the community maintenance therapy of schizophrenia. <i>International pharmacopsychiatry</i> 1977; 12(1): 54-64                                                                                                                                                                                                                                                                 | <b>PRIMARY PUBLICATION</b>              |
| 78. | Keskiner et al. Maintenance treatment of schizophrenic outpatients with a depot phenothiazine. <i>Psychosomatics</i> 1968; 9(3): 166-71.                                                                                                                                                                                                                                                                                                                                              | <b>PRIMARY PUBLICATION</b>              |
| 79. | Kissling et al. Double-blind comparison of haloperidol decanoate and fluphenazine decanoate effectiveness, side-effects, dosage and serum levels during a six months' treatment for relapse prevention. <i>Pharmacopsychiatry</i> 1985;18(3):240-5.                                                                                                                                                                                                                                   | <b>PRIMARY PUBLICATION</b>              |
| 80. | Koshikawa et al. The Comparative Effects of Risperidone Long-Acting Injection and Paliperidone Palmitate on Social Functioning in Schizophrenia: A 6-Month, Open-Label, Randomized Controlled Pilot Trial. <i>Neuropsychobiology</i> 2016;73(1):35-42.                                                                                                                                                                                                                                | <b>PRIMARY PUBLICATION</b>              |
| 81. | Takekita et al. Cognitive function and risperidone long-acting injection vs. paliperidone palmitate in schizophrenia: a 6-month, open-label, randomized, pilot trial. <i>BMC Psychiatry</i> 2016; 29(16):172.                                                                                                                                                                                                                                                                         | SECONDARY PUBLICATION OF Koshikawa 2016 |

|     |                                                                                                                                                                                                                                                                                                                                                                 |                                            |
|-----|-----------------------------------------------------------------------------------------------------------------------------------------------------------------------------------------------------------------------------------------------------------------------------------------------------------------------------------------------------------------|--------------------------------------------|
| 82. | Koshikawa et al. The effects of risperidone long-acting injection versus paliperidone palmitate on cognitive and social function in schizophrenia - an open pilot randomised controlled trial." <i>European Neuropsychopharmacology</i> 2015;25: S500-S501.                                                                                                     | SECONDARY PUBLICATION<br>OF Koshikawa 2016 |
| 83. | Lapierre YD, von Frenckell R. AMDP psychopathology factors in chronic schizophrenia: a clinical trial of two long-acting neuroleptics. <i>Mod Probl Pharmacopsychiatry</i> . 1983;20:193-203. doi:10.1159/000407841                                                                                                                                             | PRIMARY PUBLICATION                        |
| 84. | Leong et al. A comparative study of pipothiazine palmitate and fluphenazine decanoate in the maintenance of remission of schizophrenia. <i>Singapore medical journal</i> 1989; 30(5): 436-40.                                                                                                                                                                   | PRIMARY PUBLICATION                        |
| 85. | Lundin et al. Community-based rehabilitation of schizophrenia, <i>Nordic Journal of Psychiatry</i> 1992; 46:2, 121-127, DOI: 10.3109/08039489209103313                                                                                                                                                                                                          | PRIMARY PUBLICATION                        |
| 86. | Macfadden et al. A Prospective Study Comparing the Long-term Effectiveness of Injectable Risperidone Long-acting Therapy and Oral Aripiprazole in Patients with Schizophrenia. <i>Psychiatry (Edgmt)</i> 2010;7(11):23-31.                                                                                                                                      | PRIMARY PUBLICATION                        |
| 87. | McCreadie et al. Once weekly pimozide versus fluphenazine decanoate as maintenance therapy in chronic schizophrenia. <i>British Journal of Psychiatry</i> 1982;140:280-6.                                                                                                                                                                                       | PRIMARY PUBLICATION                        |
| 88. | McCreadie et al. Intermittant pimozide versus fluphenazine decanoate as maintenance therapy in chronic schizophrenia. <i>British Journal of Psychiatry</i> 1980;137:510-7                                                                                                                                                                                       | PRIMARY PUBLICATION                        |
| 89. | MC Evoy et al. Effectiveness of paliperidone palmitate vs haloperidol decanoate for maintenance treatment of schizophrenia: a randomized clinical trial. <i>JAMA</i> 2014;311(19):1978-87                                                                                                                                                                       | PRIMARY PUBLICATION                        |
| 90. | McKane et al. Haloperidol decanoate v. fluphenazine decanoate as maintenance therapy in chronic schizophrenic in-patients. <i>British Journal of Psychiatry</i> 1987;151:333-6.                                                                                                                                                                                 | PRIMARY PUBLICATION                        |
| 91. | McLaren et al. Positive and negative symptoms, depression and social disability in chronic schizophrenia: a comparative trial of bromperidol and fluphenazine decanoates. <i>Int Clin Psychopharmacol</i> . 1992;7(2):67-72.                                                                                                                                    | PRIMARY PUBLICATION                        |
| 92. | Odejide OA, Aderounmu AF. Double-blind placebo substitution: withdrawal of fluphenazine decanoate in schizophrenic patients. <i>The Journal of clinical psychiatry</i> 1982; 43(5): 195-6.                                                                                                                                                                      | PRIMARY PUBLICATION                        |
| 93. | Mosolov et al. Comparative efficacy, tolerability and impact on the social functioning of prolonged risperidone (Konsta) and olanzapine in the long-term treatment of schizophrenia and schizoaffective disorder. <i>ТРУДНЫЙ ПАЦИЕНТ ЖУРНАЛ ДЛЯ ВРАЧЕЙ</i> 2008. Available: <a href="http://t-pacient.ru/articles/6358/">http://t-pacient.ru/articles/6358/</a> | PRIMARY PUBLICATION                        |
| 94. | Potapov et al. Response, remission and relapse during the long-term treatment of schizophrenia patients with long-acting injectable risperidone versus olanzapine. <i>The International Journal of Neuropsychopharmacology</i> 2018; 11(s1):158                                                                                                                 | SECONDARY PUBLICATION OF<br>Mosolov 2008   |
| 95. | Pinto R, Bannerjee A, Ghosh N. A double-blind comparison of flupenthixol decanoate and fluphenazine decanoate in the treatment of chronic schizophrenia. <i>Acta Psychiatr Scand</i> . 1979;60(4):313-322. doi:10.1111/j.1600-0447.1979.tb00281.x                                                                                                               | PRIMARY PUBLICATION                        |
| 96. | Potkin et al. Multidimensional Assessment of Functional Outcomes in Schizophrenia: Results From QUALIFY, a Head-to-Head Trial of Aripiprazole Once-Monthly and Paliperidone Palmitate. <i>Int J Neuropsychopharmacol</i> 2017;20(1):40-49.                                                                                                                      | PRIMARY PUBLICATION                        |
| 97. | Potkin et al. Reduced sexual dysfunction with aripiprazole once-monthly versus paliperidone palmitate: results from QUALIFY. <i>Int Clin Psychopharmacol</i> 2017;32(3):147-154.                                                                                                                                                                                | SECONDARY PUBLICATION OF<br>Potkin 2017    |
| 98. | Salzman et al. Effects of aripiprazole once-monthly and paliperidone palmitate on work readiness in patients from the QUALIFY study stratified by age. <i>CNS spectrums</i> 2016;22(1):93-94. Conference: 2016 neuroscience education institute psychopharmacology congress.                                                                                    | SECONDARY PUBLICATION OF<br>Potkin 2017    |

|      |                                                                                                                                                                                                                                                                                                                                 |                                                         |
|------|---------------------------------------------------------------------------------------------------------------------------------------------------------------------------------------------------------------------------------------------------------------------------------------------------------------------------------|---------------------------------------------------------|
| 99.  | Sapin et al. Pharmacoeconomic comparison of aripiprazole once-monthly and paliperidone palmitate from a head-to-head clinical trial in schizophrenia: a US analysis. <i>Drugs Context</i> . 2016;23;5:212301.                                                                                                                   | SECONDARY PUBLICATION of Potkin 2017                    |
| 100. | Naber et al. Improvement in secondary effectiveness measures with aripiprazole once-monthly vs paliperidone palmitate in qualify, a head-to-head study. <i>CNS spectrums</i> 2015;21(1):95-96. Conference: 11th annual neuroscience education institute psychopharmacology congress.                                            | SECONDARY PUBLICATION of Potkin 2017                    |
| 101. | Quitkin et al. Long-acting oral vs injectable antipsychotic drugs in schizophrenics. <i>Archives of General Psychiatry</i> 1978;35:889-92.                                                                                                                                                                                      | <b>PRIMARY PUBLICATION</b>                              |
| 102. | Rifkin et al. Fluphenazine decanoate, fluphenazine hydrochloride given orally, and placebo in remitted schizophrenics. I. Relapse rates after one year. <i>Arch Gen Psychiatry</i> 1977;34(1): 43-47.                                                                                                                           | <b>PRIMARY PUBLICATION</b>                              |
| 103. | Rifkin et al. Fluphenazine decanoate, oral fluphenazine, and placebo in treatment of remitted schizophrenics. II. Rating scale data. <i>Arch Gen Psychiatry</i> 1977;34(10): 1215-1219.                                                                                                                                         | SECONDARY PUBLICATION of Rifkin 1977                    |
| 104. | Rossi et al. Efficacia terapeutica e tollerabilità del bromperidolo decanoato vs. flufenazina decanoato nel disturbo schizofrenico. <i>Rivista sperimentale di freniatria e medicina legale delle alienazioni mentali</i> 1990;64(6):1379-1386                                                                                  | <b>PRIMARY PUBLICATION</b>                              |
| 105. | Rossi et al. Action of bromperidol decanoate in the treatment of negative symptoms of schizophrenia - comparison with haloperidol decanoate [Azione del bromperidolo decanoato nel trattamento dei sintomi negativi della schizofrenia - confronto con l'alooperidolo decanoato]. <i>Rivista di Psichiatria</i> 1992;27:265-70. | <b>PRIMARY PUBLICATION</b>                              |
| 106. | Sampath et al. Neuroleptic discontinuation in the very stable schizophrenic patient relapse rates and serum neuroleptic levels. <i>Human Psychopharmacology</i> 1992;7:255-64.                                                                                                                                                  | <b>PRIMARY PUBLICATION</b>                              |
| 107. | Savitz et al. Efficacy and Safety of Paliperidone Palmitate 3-Month Formulation for Patients with Schizophrenia: A Randomized, Multicenter, Double-Blind, Noninferiority Study. <i>Int J Neuropsychopharmacol</i> 2016;19(7). pii: pyw018.                                                                                      | <b>PRIMARY PUBLICATION</b>                              |
| 108. | Savitz et al. Efficacy and safety of paliperidone palmitate 3-month formulation in Latin American patients with schizophrenia: A subgroup analysis of data from two large phase 3 randomized, double-blind studies. <i>Braz J Psychiatry</i> . 2019;41(6):499-510. doi:10.1590/1516-4446-2018-0153                              | SECONDARY PUBLICATION of Savitz 2016 and Berwaerts 2015 |
| 109. | Savitz et al. Paliperidone Palmitate (3-Month Formulation) Administered once Quarterly Prevents Relapse in Latin American Patients with Schizophrenia. <i>Biological Psychiatry</i> 2017; 81(10), Supplement: S211.                                                                                                             | SECONDARY PUBLICATION of Savitz 2016                    |
| 110. | Kern Sliwa et al. An assessment of injection site reaction and injection site pain of 1-month and 3-month long-acting injectable formulations of paliperidone palmitate. <i>Perspect Psychiatr Care</i> . 2018;54(4):530-538. doi: 10.1111/ppc.12267                                                                            | SECONDARY PUBLICATION of Savitz 2016                    |
| 111. | Mathews et al. Comparison of Paliperidone Palmitate 1-Month Vs 3-Month Long-Acting Injectables for Negative Symptom Improvement. <i>Biological Psychiatry</i> 2018; 83 (9) Supplement: S316. F199.                                                                                                                              | SECONDARY PUBLICATION of Savitz 2016                    |
| 112. | Gopal et al. Improvement of Negative Symptoms in Schizophrenia with Paliperidone Palmitate 1-Month and 3-Month Long-Acting Injectables: Results from a Phase 3 Non-Inferiority Study. <i>Neuropsychiatr Dis Treat</i> . 2020;16:681-690. Published 2020 Mar 6. doi:10.2147/NDT.S226296                                          | SECONDARY PUBLICATION of Savitz 2016                    |
| 113. | Russu et al. Pharmacokinetic-Pharmacodynamic Characterization of Relapse Risk for Paliperidone Palmitate 1-Month and 3-Month Formulations. <i>J Clin Psychopharmacol</i> . 2019;39(6):567-574. doi:10.1097/JCP.0000000000001137                                                                                                 | SECONDARY PUBLICATION of Savitz 2016                    |
| 114. | Brown et al. Evaluation of paliperidone palmitate long-acting injectable antipsychotic therapy as an early treatment option in patients with schizophrenia [published online ahead of print, 2019 Sep 13]. <i>Early Interv Psychiatry</i> . 2019;10.1111/eip.12868. doi:10.1111/eip.12868                                       | SECONDARY PUBLICATION of Savitz 2016                    |
| 115. | Nash et al. Predictors of achieving remission in schizophrenia patients treated with paliperidone palmitate 3-month formulation. <i>Neuropsychiatr Dis Treat</i> . 2019;15:731-737. Published 2019 Mar 22. doi:10.2147/NDT.S194264                                                                                              | SECONDARY PUBLICATION of Savitz 2016                    |

|      |                                                                                                                                                                                                                                                          |                                        |
|------|----------------------------------------------------------------------------------------------------------------------------------------------------------------------------------------------------------------------------------------------------------|----------------------------------------|
| 116. | Schlosberg A, Shadmi M. A comparative controlled study of two long-acting phenothiazines: Pipothiazine palmitate and fluphenazine decanoate. <i>Current Therapeutic Research</i> 1978;23(5):642-54.                                                      | <b>PRIMARY PUBLICATION</b>             |
| 117. | Schooler et al. Prevention of relapse in schizophrenia. An evaluation of fluphenazine decanoate. <i>Archives of General Psychiatry</i> 1980;37(1):16-24                                                                                                  | <b>PRIMARY PUBLICATION</b>             |
| 118. | Levine et al. Discontinuation of oral and depot fluphenazine in schizophrenic patients after one year of continuous medication: a controlled study. <i>Advances in biochemical psychopharmacology</i> 1980;24:483-493.                                   | SECONDARY PUBLICATION of Schooler 1980 |
| 119. | Sharma SK, Jaigirdar SH. A comparison of fluphenazine decanoate and haloperidol decanoate in chronic schizophrenia. <i>British Journal of Clinical Research</i> 1991;2:177-86.                                                                           | <b>PRIMARY PUBLICATION</b>             |
| 120. | Schneider et al. Clinical blood chemistry values and long acting phenothiazines. <i>Pharmacopsychiatry</i> 1981;14:107-114                                                                                                                               | <b>PRIMARY PUBLICATION</b>             |
| 121. | Simon et al. Standard and long-acting depot neuroleptics in chronic schizophrenics. <i>Archives of General Psychiatry</i> 1978;35:893-897                                                                                                                | <b>PRIMARY PUBLICATION</b>             |
| 122. | Singh AN, Saxena B. A comparative study of prolonged action (depot) neuroleptics: pipotiazine palmitate versus fluphenazine enanthate in chronic schizophrenic patients. <i>Current Therapeutic Research</i> 1979;25(1):121-32.                          | <b>PRIMARY PUBLICATION</b>             |
| 123. | Smeraldi et al. Bromperidol decanoate vs placebo in treating schizophrenia in the residual phase. <i>New Trends in Experimental and Clinical Psychiatry</i> 1990;6(4):187-198                                                                            | <b>PRIMARY PUBLICATION</b>             |
| 124. | Song Y. A double-blind control study on the effect of pipotiazine palmitate and fluphenazine decanoate in the treatment of schizophrenia [data not available]. <i>Chinese Journal of Neurology and Psychiatry</i> 1993;26(3):137-140                     | <b>PRIMARY PUBLICATION</b>             |
| 125. | Steinert et al. A comparative trial of depot pipothiazine. <i>The Journal of international medical research</i> 1986;14(2):72-77                                                                                                                         | <b>PRIMARY PUBLICATION</b>             |
| 126. | Subotnik et al. Long-Acting Injectable Risperidone for Relapse Prevention and Control of Breakthrough Symptoms After a Recent First Episode of Schizophrenia: A Randomized Clinical Trial. <i>JAMA Psychiatry</i> 2015;72:822-829                        | <b>PRIMARY PUBLICATION</b>             |
| 127. | Subotnik et al. Clinical advantages of long-acting injectable risperidone after an initial episode of schizophrenia. <i>Schizophrenia Bulletin</i> 2013;39:s353-s354.                                                                                    | SECONDARY PUBLICATION of Subotnik 2015 |
| 128. | Nuechterlein et al. The impact of long-acting injectable versus oral risperidone on cognition and work functioning after an initial psychotic episode: The critical role of early medication adherence. <i>Early Intervention in Psychiatry</i> 2012;6,8 | SECONDARY PUBLICATION of Subotnik 2015 |
| 129. | Nuechterlein et al. Long-acting injectable risperidone and medication adherence enhance cognition and work functioning after a first psychotic episode. <i>Schizophrenia Bulletin</i> 2013;39,S347.                                                      | SECONDARY PUBLICATION of Subotnik 2015 |
| 130. | Bartzokis et al. Long acting injection versus oral risperidone in first-episode schizophrenia: differential impact on white matter myelination trajectory. <i>Schizophr Res</i> 2011;132(1): 35-41.                                                      | SECONDARY PUBLICATION of Subotnik 2015 |
| 131. | Bartzokis et al. Impact on intracortical myelination trajectory of long acting injection versus oral risperidone in first-episode schizophrenia. <i>Schizophr Res</i> 2012;140(1-3): 122-128.                                                            | SECONDARY PUBLICATION of Subotnik 2015 |
| 132. | Bartzokis et al. The impact of antipsychotic medication on intracortical myelination in schizophrenia. <i>Schizophrenia Bulletin</i> 2013;39: S322.                                                                                                      | SECONDARY PUBLICATION of Subotnik 2015 |

|      |                                                                                                                                                                                                                                                                                     |                                        |
|------|-------------------------------------------------------------------------------------------------------------------------------------------------------------------------------------------------------------------------------------------------------------------------------------|----------------------------------------|
| 133. | Bartzokis et al. The mechanism of action of antipsychotics and intracortical myelination in schizophrenia. <i>Biological Psychiatry</i> 2014;75(9): 325S.                                                                                                                           | SECONDARY PUBLICATION of Subotnik 2015 |
| 134. | Subotnik et al. Effectiveness of long-acting injectable risperidone after an initial psychotic episode: Relapse prevention and symptom reduction. <i>Early Intervention in Psychiatry</i> 2012;6,7.                                                                                 | SECONDARY PUBLICATION of Subotnik 2015 |
| 135. | Walker CA. A double-blind comparative trial of the decanoates of clopenthixol and fluphenazine in the treatment of chronic schizophrenic out-patients. <i>Pharmatherapeutica</i> 1983;3(5):289-93.                                                                                  | <b>PRIMARY PUBLICATION</b>             |
| 136. | Wistedt et al. A clinical double blind comparison between haloperidol decanoate and fluphenazine decanoate. <i>Current Therapeutic Research</i> 1984; 35(5):804–14.                                                                                                                 | <b>PRIMARY PUBLICATION</b>             |
| 137. | Wistedt B. A comparison trial of haloperidol decanoate and fluphenazine decanoate in chronic schizophrenic patients. <i>International Clinical Psychopharmacology</i> 1986;Suppl 1:15–23.                                                                                           | SECONDARY PUBLICATION of Wistedt 1984  |
| 138. | Wistedt B, Koskinen T, Thelander S, Nerdrum T, Pedersen V, Mølbjerg C. Zuclopenthixol decanoate and haloperidol decanoate in chronic schizophrenia: a double-blind multicentre study. <i>Acta Psychiatr Scand.</i> 1991;84(1):14-21. doi:10.1111/j.1600-0447.1991.tb01414.x         | <b>PRIMARY PUBLICATION</b>             |
| 139. | Woggon B, Dick P, Fleischhauer HJ, Gmur M, Gruber G, Angst J, et al. [Comparison of the effects of pipothiazine palmitate and fluphenazine decanoate. Results of a Multicenter Double-Blind Trial]. [Article in German]. <i>International Pharmacopsychiatry</i> 1977;12(4):193-209 | <b>PRIMARY PUBLICATION</b>             |
| 140. | Zissis et al. Haloperidol decanoate, a new long-acting antipsychotic, in chronic schizophrenics: Double-blind comparison with placebo. <i>Curr Ther Res, Clin Exp</i> 1982;31,650-655                                                                                               | <b>PRIMARY PUBLICATION</b>             |
| 141. | Zuardi et al. Double-blind comparison between two forms of haloperidol: an oral preparation and a new depot decanoate in the maintenance of schizophrenic inpatients. <i>Current Therapeutic Research</i> 1983;34 (2) 253-261. (HANDSEARCHED)                                       | <b>PRIMARY PUBLICATION</b>             |

### List of excluded studies

|    |                                                                                                                                                                                                                                                                                                                                                          |                                                                        |
|----|----------------------------------------------------------------------------------------------------------------------------------------------------------------------------------------------------------------------------------------------------------------------------------------------------------------------------------------------------------|------------------------------------------------------------------------|
| 1. | Adamson et al. Fluphenazine decanoate trial in chronic inpatient schizophrenics failing to absorb oral chlorpromazine. <i>Diseases of the Nervous System</i> 1973;34(4):181-91.                                                                                                                                                                          | WRONG DESIGN (short follow-up)                                         |
| 2. | Ahlfors et al. Clopenthixol decanoate and perphenazine enanthate in schizophrenic patients. A double-blind Nordic multicentre trial. <i>Acta Psychiatr Scand Suppl.</i> 1980;279:77-91. doi:10.1111/j.1600-0447.1980.tb07085.x                                                                                                                           | WRONG POPULATION (patients requiring treatment for acute symptoms)     |
| 3. | Alphs et al. Design and rationale of the Paliperidone Palmitate Research in Demonstrating Effectiveness (PRIDE) study: a novel comparative trial of once-monthly paliperidone palmitate versus daily oral antipsychotic treatment for delaying time to treatment failure in persons with schizophrenia. <i>J Clin Psychiatry</i> 2014;75(12): 1388-1393. | WRONG COMPARISON (LAI vs. mixed oral APs)                              |
| 4. | Alphs et al. Real-world outcomes of paliperidone palmitate compared to daily oral antipsychotic therapy in schizophrenia: a randomized, open-label, review board-blinded 15-month study. <i>Journal of Clinical Psychiatry</i> 2015;76, 554-561.                                                                                                         | WRONG COMPARISON (LAI vs. mixed oral APs)                              |
| 5. | Alphs et al. A pragmatic analysis comparing once-monthly paliperidone palmitate versus daily oral antipsychotic treatment in patients with schizophrenia. <i>Schizophrenia Research</i> 2016;170(2-3):259-64.                                                                                                                                            | WRONG COMPARISON (LAI vs. mixed oral APs)                              |
| 6. | Alphs et al. Treatment effect with paliperidone palmitate compared with oral antipsychotics in patients with recent-onset versus more chronic schizophrenia and a history of criminal justice system involvement. <i>Early Interv Psychiatry</i> 2018;12(1):55-65.                                                                                       | WRONG COMPARISON (LAI vs. mixed oral APs)                              |
| 7. | Altamura AC, Curry SH, Montgomery S, Wiles DH. Early unwanted effects of fluphenazine esters related to plasma fluphenazine concentrations in schizophrenic patients. <i>Psychopharmacology</i> 1985;87:30-3.                                                                                                                                            | WRONG COMPARISON (different doses of the same medication are compared) |
| 8. | Andorn et al. Monthly Extended-Release Risperidone (RBP-7000) in the Treatment of Schizophrenia: Results From the Phase 3 Program. <i>J Clin Psychopharmacol.</i> 2019;39(5):428-433. doi:10.1097/JCP.0000000000001076                                                                                                                                   | WRONG DESIGN (not randomized)                                          |

|     |                                                                                                                                                                                                                                                                                                                             |                                                                                        |
|-----|-----------------------------------------------------------------------------------------------------------------------------------------------------------------------------------------------------------------------------------------------------------------------------------------------------------------------------|----------------------------------------------------------------------------------------|
| 9.  | Angst J, Frei M, Scharfetter C. The depot neuroleptic agent fluspirilene [Das Depotneurolepticum Fluspirilen. Klinische Pruefung im offenen Versuch und als Doppelblindstudie im Vergleich zu Fluphenazin Decanoat]. <i>Pharmakopsychiatrie und Neuropsychopharmakologie</i> 1973;6(1):13-28. [MEDLINE: 74281360]           | WRONG COMPARISON (fluspirilene)                                                        |
| 10. | Arango et al. Randomised clinical trial comparing oral versus depot formulations of zuclopenthixol in patients with schizophrenia and previous violence. <i>Eur Psychiatry</i> 2006;21(1): 34-40.                                                                                                                           | WRONG POPULATION (patients requiring treatment for acute symptoms)                     |
| 11. | Asarnow RE, Marder SR, Mintz J, Van Putten T, Zimmerman KE. Differential effect of low and conventional doses of fluphenazine on schizophrenic outpatients with good or poor information-processing skills. <i>Archives of General Psychiatry</i> 1988;45:822-7.                                                            | WRONG COMPARISON (different doses of the same medication are compared)                 |
| 12. | Baastrup et al. A controlled Nordic multicentre study of zuclopenthixol acetate in oil solution, haloperidol and zuclopenthixol in the treatment of acute psychosis. <i>Acta Psychiatrica Scandinavica</i> 1993;87(1): 48-58.                                                                                               | WRONG INTERVENTION (LAIs not included)                                                 |
| 13. | Bankier RG. A comparison of fluspirilene and trifluoperazine in the treatment of acute schizophrenic psychosis. <i>Journal of Clinical Pharmacology and The Journal of New Drugs</i> 1973;13(1):44-7.                                                                                                                       | WRONG POPULATION (patients requiring treatment for acute symptoms)                     |
| 14. | Barnes et al. Large effect of baseline treatment with long acting antipsychotic drugs on randomized treatment outcomes. <i>Schizophrenia Research</i> 2010;117(2-3):380.                                                                                                                                                    | WRONG COMPARISON (LAI vs. mixed oral APs)                                              |
| 15. | Barnett et al. Cost and cost-effectiveness in a randomized trial of long-acting risperidone for schizophrenia. <i>J Clin Psychiatry</i> 2012;73(5):696-702.                                                                                                                                                                 | WRONG COMPARISON (LAI vs. mixed oral APs)                                              |
| 16. | Bechelli LP, Navas Filho F. Short term double blind trial of pipothiazine palmitate and haloperidol in the acute phase of schizophrenia. <i>Encephale</i> 1986;12(3):121-5.                                                                                                                                                 | WRONG POPULATION (patients requiring treatment for acute symptoms)                     |
| 17. | Bellnier et al. A Pilot Study to Evaluate the Risk of Sexual Dysfunction Associated with Long-term Use of Atypical Long-Acting Injectable Antipsychotics (LAIs) in the Treatment of Schizophrenia. College of Psychiatric and Neurologic Pharmacists 2016 Poster Abstracts. <i>Journal of Pharmacy Practice</i> 2016;29(3). | WRONG DESIGN (observational study)                                                     |
| 18. | Benabarre et al. Efficacy and safety of long-acting injectable risperidone in maintenance phase of bipolar and schizoaffective disorder. <i>Actas Españolas de Psiquiatría</i> 2009;37(3): 143-147.                                                                                                                         | WRONG DESIGN (observational study)                                                     |
| 19. | Bilone et al. Fluphenazine decanoate and haloperidol decanoate: 2 neuroleptics compared in nonacute psychiatric pathology. Long-term crossover trial. II. Tolerability and side effects. <i>Neurologia Psichiatria Scienze Umane</i> 1988;8(3 SUPPL.): 49-59.                                                               | WRONG DESIGN (cross-over longitudinal study)                                           |
| 20. | Binder et al. Randomized comparison trial of oral atypicals vs long-acting injectable risperidone in patients with bipolar disorder. <i>International Journal of Neuropsychopharmacology</i> 2006;9:S181-S181.                                                                                                              | WRONG COMPARISON (LAI vs. mixed oral APs)                                              |
| 21. | Bobo et al. A randomized open comparison of long-acting injectable risperidone and treatment as usual for prevention of relapse, rehospitalization, and urgent care referral in community-treated patients with rapid cycling bipolar disorder. <i>Clin Neuropharmacol</i> 2011: 34(6): 224-233.                            | WRONG COMPARISON (LAI vs. mixed oral APs)                                              |
| 22. | Bobo et al. Does long-acting injectable risperidone (RLAI) reduce relapse and rehospitalization in patients with frequently relapsing bipolar disorder? <i>Biological Psychiatry</i> 2011;69(9): 375.                                                                                                                       | WRONG COMPARISON (risperidone depot + treatment as usual vs. treatment as usual alone) |
| 23. | Borger J, Van Epen JH, Dekkers A. A double-blind clinical evaluation of diCerent dose intervals with fluspirilene (IMAP). <i>Acta Psychiatrica Belgica</i> 1978;78:383-91.                                                                                                                                                  | WRONG COMPARISON (different doses of the same medication are compared)                 |
| 24. | Boulton et al. Pharmacokinetics and tolerability of intramuscular, oral and intravenous aripiprazole in healthy subjects and in patients with schizophrenia. <i>Clin Pharmacokinet</i> 2008;47(7): 475-485.                                                                                                                 | WRONG COMPARISON (LAI vs. mixed oral APs)                                              |
| 25. | Buckley et al. PROACTIVE Study Comparison of SGA oral medications and a long-acting injectable SGA: the PROACTIVE study. <i>Schizophr Bull</i> 2015;41(2):449-59.                                                                                                                                                           | WRONG COMPARISON (LAI vs. mixed oral APs)                                              |
| 26. | Saito et al. Predicting relapse with residual symptoms in schizophrenia: A secondary analysis of the PROACTIVE trial. <i>Schizophr Res.</i> 2020;215:173-180. doi:10.1016/j.schres.2019.10.037<br>SECONDARY PUBLICATION OF Buckley 2015                                                                                     | WRONG COMPARISON (LAI vs. mixed oral APs)                                              |



|     |                                                                                                                                                                                                                                                                                                                                                           |                                                                                                                           |
|-----|-----------------------------------------------------------------------------------------------------------------------------------------------------------------------------------------------------------------------------------------------------------------------------------------------------------------------------------------------------------|---------------------------------------------------------------------------------------------------------------------------|
| 27. | Buckley et al. Comparison of Injectable and Oral Antipsychotics in Relapse Rates in a Pragmatic 30-Month Schizophrenia Relapse Prevention Study. <i>Psychiatr Serv</i> 2016;67(12):1370-1372.                                                                                                                                                             | WRONG COMPARISON (LAI vs. mixed oral APs)                                                                                 |
| 28. | Chien CP, Cole JO. Depot phenothiazine treatment in acute psychosis: A sequential comparative clinical study. <i>American Journal of Psychiatry</i> 1973;130(1):13-7.                                                                                                                                                                                     | WRONG POPULATION (patients requiring treatment for acute symptoms)                                                        |
| 29. | Chouinard et al. Fluphenazine enanthate and fluphenazine decanoate in the treatment of schizophrenic outpatients: extrapyramidal symptoms and therapeutic effect. <i>The American Journal of Psychiatry</i> 1982;139(3): 312-318.                                                                                                                         | WRONG COMPARISON (two formulations of the same medication are compared: Fluphenazine decanoate vs. Fluphenazine enantate) |
| 30. | Chouinard G, Annable L, Steinberg S. A controlled clinical trial of fluspirilene, a long-acting injectable neuroleptic, in schizophrenic patients with acute exacerbation. <i>Journal of Clinical Psychopharmacology</i> 1986;6(1):21-6.                                                                                                                  | WRONG POPULATION (patients requiring treatment for acute symptoms)                                                        |
| 31. | Citrome et al. Assessing effectiveness of aripiprazole lauroxil vs placebo for the treatment of schizophrenia using number needed to treat and number needed to harm. <i>Neuropsychiatr Dis Treat.</i> 2019;15:2639-2646. Published 2019 Sep 12. doi:10.2147/NDT.S207910<br>SECONDARY PUBLICATION of Meltzer 2015                                         | WRONG POPULATION (patients requiring treatment for acute symptoms)                                                        |
| 32. | Citrome et al. Effect of aripiprazole lauroxil in patients with acute schizophrenia as assessed by the Positive and Negative Syndrome Scale-supportive analyses from a Phase 3 study. <i>CNS Spectr.</i> 2018;23(4):284-290. doi: 10.1017/S1092852917000396.<br>SECONDARY PUBLICATION of Meltzer 2015                                                     | WRONG POPULATION (patients requiring treatment for acute symptoms)                                                        |
| 33. | Cookson IB, Muthu MS, George A, Dewey M. High dose neuroleptic treatment of chronic schizophrenic inpatients. <i>Research Communications in Psychology, Psychiatry and Behaviour</i> 1983;8(4):305-15.                                                                                                                                                    | WRONG COMPARISON (different doses of the same medication are compared)                                                    |
| 34. | Cookson IB. The effects of a 50% reduction of cis(Z)-flupenthixol decanoate in chronic schizophrenic patients maintained on a high dose regime. <i>International Clinical Psychopharmacology</i> 1987;2:141-9.                                                                                                                                            | WRONG COMPARISON (different doses of the same medication are compared)                                                    |
| 35. | Correll et al. Social and functional outcomes with two doses of aripiprazole lauroxil vs placebo in patients with schizophrenia: a post-hoc analysis of a 12-week phase 3 efficacy study. <i>Psychiatry Res.</i> 2019;274:176-181.<br>SECONDARY PUBLICATION of Meltzer 2015                                                                               | WRONG POPULATION (patients requiring treatment for acute symptoms)                                                        |
| 36. | Covell et al. Effectiveness of switching from long-acting injectable fluphenazine or haloperidol decanoate to long-acting injectable risperidone microspheres: an open-label, randomized controlled trial. <i>J Clin Psychiatry</i> 2012;73(5):669-75.<br>HANDSEARCHED                                                                                    | WRONG COMPARISON (mixed LAIs vs. mixed oral APs)                                                                          |
| 37. | Curry SH, Adamson L. Double-blind trial of fluphenazine decanoate. <i>Lancet</i> 1972; 2(7776): 543-544.                                                                                                                                                                                                                                                  | WRONG DESIGN (short follow-up: 4 weeks)                                                                                   |
| 38. | Curson et al. Long-term depot maintenance of chronic schizophrenic out-patients: the seven year follow-up of the Medical Research Council fluphenazine/placebo trial. III. Relapse postponement or relapse prevention? The implications for long-term outcome. <i>The British journal of psychiatry: the journal of mental science</i> 1985;146: 474-480. | WRONG DESIGN (observational study)                                                                                        |
| 39. | Curtis et al. Long-acting risperidone improves negative symptoms in stable psychotic patients. <i>Journal of Psychopharmacology</i> 2008;22(3): 254-261.                                                                                                                                                                                                  | WRONG DESIGN (post-hoc analysis)                                                                                          |
| 40. | Czekalla et al. Analysis of randomized clinical trials with oral and intramuscular (IM) olanzapine in bipolar-affective disorders based on EBM criteria and therapeutic effect calculation. <i>Schizophrenia Research</i> 2003;60(1): 279-279.                                                                                                            | WRONG DESIGN (abstract of a systematic review)                                                                            |
| 41. | De Hert et al. Efficacy and safety of aripiprazole once-monthly in obese and nonobese patients with schizophrenia: a post hoc analysis. <i>Neuropsychiatr Dis Treat</i> 2015;11: 1299-1306.                                                                                                                                                               | WRONG DESIGN (post-hoc analysis)                                                                                          |
| 42. | De Marinis et al. Switching to long-acting injectable risperidone is beneficial with regard to clinical outcomes, regardless of previous conventional medication in patients with schizophrenia. <i>Pharmacopsychiatry</i> 2007;40(6): 257-263.                                                                                                           | WRONG COMPARISON (LAI vs. mixed oral APs)                                                                                 |
| 43. | De Nardi et al. Fluphenazine decanoate and haloperidol decanoate: 2 neuroleptics compared in nonacute psychiatric pathology. Long-term crossover trial. III Psychodynamic aspects. <i>Neurologia Psichiatria Scienze Umane</i> 1988;8(3 SUPPL.): 60-83.                                                                                                   | WRONG DESIGN (longitudinal cross-over study)                                                                              |
| 44. | Donlon PT, Axelrad AD, Tupin JP, Chien C. Comparison of depot fluphenazines: Duration of action and incidence of side effects. <i>Comprehensive Psychiatry</i> 1976;17(2):369-76.                                                                                                                                                                         | WRONG DESIGN (short follow-up)                                                                                            |

|     |                                                                                                                                                                                                                                                                                                                                                           |                                                                                                                                       |
|-----|-----------------------------------------------------------------------------------------------------------------------------------------------------------------------------------------------------------------------------------------------------------------------------------------------------------------------------------------------------------|---------------------------------------------------------------------------------------------------------------------------------------|
| 45. | Dyachkova et al. Effectiveness of 300mg/4 weeks Olanzapine Long-Acting Injection from data mining of an open-label extension study. <i>Schizophrenia Research</i> 2010;117(2-3): 264-265.                                                                                                                                                                 | WRONG DESIGN (observational study)                                                                                                    |
| 46. | Eramo et al. All-cause discontinuation and safety of aripiprazole once-monthly for the treatment of schizophrenia: A pooled analysis of two double-blind, randomized, controlled trials. <i>Schizophrenia Research</i> 2014;153: S174.                                                                                                                    | WRONG DESIGN (pooled analysis of two RCTs)                                                                                            |
| 47. | Eramo et al. The efficacy and safety of aripiprazole once-monthly in obese and non-obese patients with schizophrenia; a post-hoc analysis. <i>International Journal of Neuropsychopharmacology</i> 2014;17: 69.                                                                                                                                           | WRONG DESIGN (post-hoc analysis)                                                                                                      |
| 48. | Fallon et al. The social outcome of patients in a trial of long-term continuation therapy in schizophrenia: pimozide vs fluphenazine. <i>Psychological Medicine</i> 1978;8:265-74. SECONDARY PUBLICATION of Falloon 1978                                                                                                                                  | WRONG POPULATION (patients requiring treatment for acute symptoms)                                                                    |
| 49. | Falloon I, Watt D. A comparative controlled trial of pimozide and fluphenazine decanoate in the continuation therapy of schizophrenia. <i>Psychological Medicine</i> 1978;8:59-70.                                                                                                                                                                        | WRONG POPULATION (patients requiring treatment for acute symptoms)                                                                    |
| 50. | Fallu et al. Randomized trial of oral atypical antipsychotics compared to long acting injectable risperidone in patients with bipolar disorder: An interim safety analysis." <i>Biological Psychiatry</i> 2005;57(8): 235-235.                                                                                                                            | WRONG COMPARISON (LAI vs. mixed oral APs)                                                                                             |
| 51. | Fensbo C. Zuclopenthixol acetat, haloperidol og zuclopenthixol i behandling af akut psykotiske patienter. En kontrolleret multicenterundersøgelse. <i>Nordisk Psykiatrisk Tidsskrift</i> 1990;44(3): 295-297. Secondary publication of Bastrup 1993                                                                                                       | WRONG INTERVENTION (LAIs not included)                                                                                                |
| 52. | Fleischhacker et al. Treatment of schizophrenia with long-acting injectable risperidone: a 12-month open-label trial of the first long-acting second-generation antipsychotic. <i>The Journal of clinical psychiatry</i> 2003;64(10): 1250-1257.                                                                                                          | WRONG COMPARISON (different doses of the same medication are compared)                                                                |
| 53. | Fleischhacker et al. Functional outcomes with aripiprazole once-monthly in two double-blind, placebo- and active-controlled studies (aspire us 246 and aspire eu 247) for the treatment of schizophrenia. <i>Value in health</i> 2013;16, A550.                                                                                                           | WRONG DESIGN (pooled analysis of two RCTs)                                                                                            |
| 54. | Frangos H, Zissis NP, Leontopoulos I, et al. Double-blind therapeutic evaluation of fluspililene compared with fluphenazine decanoate in chronic schizophrenics. <i>Acta Psychiatr Scand.</i> 1978;57(5):436-446. doi:10.1111/j.1600-0447.1978.tb06912.x                                                                                                  | WRONG COMPARISON (fluspililene)                                                                                                       |
| 55. | Fricchione Parise et al. Long-acting injectable antipsychotics: second-generation compared to first-generation drugs. Clinical outcomes and reflections. <i>Journal: European neuropsychopharmacology</i> 2016;26(0): s535-S536. Conference: 29th european college of neuropsychopharmacology congress, ECNP 2016. Austria.                               | WRONG COMPARISON (comparison of mixed groups of LAIs)                                                                                 |
| 56. | Galfi B, Benson K, Grynaeus T. Results with the sustained action neuroleptic fluspililene on chronic schizophrenic patients undergoing occupational therapy [Erfahrungen mit dem anhaltend wirkenden Neuroleptikum Fluspililene bei arbeitstherapeutisch beschaffigten chronisch Schizophrenen]. <i>International Pharmacopsychiatry</i> 1973;8(1):37-59. | WRONG COMPARISON (fluspililene)                                                                                                       |
| 57. | Gerlach J, Kramp P, Kristjansen P, Lauritsen B, Luhdorf K, Munkvad I. Peroral and parenteral administration of long-acting neuroleptics: a double-blind study of penfluridol compared to flupenthixol decanoate in the treatment of schizophrenia. <i>Acta Psychiatrica Scandinavica</i> 1975;52:132-44.                                                  | WRONG DESIGN (patients were already on one of the studied medications and have been randomised to keep it or switch to the other one) |
| 58. | Gopal et al. Incidence and time course of extrapyramidal symptoms: A comparison of oral and long-acting injectable paliperidone randomized controlled studies. <i>International Journal of Neuropsychopharmacology</i> 2012;15: 50-51.                                                                                                                    | WRONG DESIGN (pooled analysis)                                                                                                        |
| 59. | Gopal et al. Rates and time course of extrapyramidal symptoms: A comparison of oral and long-acting intramuscular (LAI) paliperidone randomized controlled studies. <i>Schizophrenia Research</i> 2012;136, S257.                                                                                                                                         | WRONG DESIGN (pooled analysis)                                                                                                        |
| 60. | Goldstein MJ, Rodnick EH, Evans JR, May PRA, Steinberg MR. Drug and family therapy in the aftercare of acute schizophrenics. <i>Archives of General Psychiatry</i> 1978;35:1169-77.                                                                                                                                                                       | WRONG COMPARISON (different doses of the same medication are compared)                                                                |
| 61. | Haider I. A controlled trial of fluphenazine enanthate in hospitalized chronic schizophrenics. <i>The British journal of psychiatry: the journal of mental science</i> 1968;114(512): 837-841.                                                                                                                                                            | WRONG DESIGN (short follow-up: 6 weeks)                                                                                               |
| 62. | Hard et al. Pharmacokinetics and safety of deltoid or gluteal injection of aripiprazole lauroxil NanoCrystal™ Dispersion used for initiation of the long-acting antipsychotic aripiprazole lauroxil. <i>Ther Adv Psychopharmacol.</i> 2019;9:2045125319859964. Published 2019 Jul 2. doi:10.1177/2045125319859964                                         | WRONG COMPARISON (different doses and sites of injection of the same medication are compared)                                         |

|     |                                                                                                                                                                                                                                                                                                                                                                 |                                                                        |
|-----|-----------------------------------------------------------------------------------------------------------------------------------------------------------------------------------------------------------------------------------------------------------------------------------------------------------------------------------------------------------------|------------------------------------------------------------------------|
| 63. | Hodgson RE. Evaluating the cost and clinical effectiveness of long-acting, injectable aripiprazole and paliperidone palmitate once a month in a real-world setting [published correction appears in <i>Clinicoecon Outcomes Res.</i> 2019 Sep 09;11:dlxviii]. <i>Clinicoecon Outcomes Res.</i> 2019;11:517-524. Published 2019 Aug 13. doi:10.2147/CEOR.S191198 | WRONG DESIGN (observational study)                                     |
| 64. | Hogarty GE, McEvoy JP, Munetz M, DiBarry AL, Bartone P, Cather R, et al. Dose of fluphenazine, familial expressed emotion, and outcome in schizophrenia. <i>Archives of General Psychiatry</i> 1988;45:797-805.                                                                                                                                                 | WRONG COMPARISON (different doses of the same medication are compared) |
| 65. | Hill et al. Incidences of extrapyramidal symptoms in patients with schizophrenia after treatment with long-acting injection (depot) or oral formulations of olanzapine. <i>Clinical Schizophrenia and Related Psychoses</i> 2014;7, 216-222.                                                                                                                    | WRONG DESIGN (pooled analysis)                                         |
| 66. | Hirsch SR, Jolley AG. The dysphoric syndrome in schizophrenia and its implications for relapse. <i>Br J Psychiatry Suppl.</i> 1989;(5):46-50.                                                                                                                                                                                                                   | WRONG DESIGN (discontinuation study)                                   |
| 67. | Hsu et al. Comparison of intramuscular olanzapine, orally disintegrating olanzapine tablets, oral risperidone solution, and intramuscular haloperidol in the management of acute agitation in an acute care psychiatric ward in Taiwan. <i>J Clin Psychopharmacol</i> 2010;30(3): 230-234.                                                                      | WRONG COMPARISON (long-acting formulations not included)               |
| 68. | Huang et al. A randomized, 13-week study assessing the efficacy and metabolic effects of paliperidone palmitate injection and olanzapine in first-episode schizophrenia patients. <i>Prog Neuropsychopharmacol Biol Psychiatry.</i> 2018;81:122-130. doi:10.1016/j.pnpbp.2017.10.021                                                                            | WRONG POPULATION (patients requiring treatment for acute symptoms)     |
| 69. | Isitt et al. Health-related quality of life in acute schizophrenia patients treated with RBP-7000 once monthly risperidone: An 8-week, randomized, double-blind, placebo-controlled, multicenter phase 3 study. <i>Schizophr Res</i> 2016;174(1-3):126-131. doi: 10.1016/j.schres.2016.03.020.                                                                  | WRONG POPULATION (patients requiring treatment for acute symptoms)     |
| 70. | Johnson DAW, Ludlow JM, Street K, Taylor RDW. Double-blind comparison of half-dose and standard-dose flupenthixol decanoate in the maintenance treatment of stabilised outpatients with schizophrenia. <i>British Journal of Psychiatry</i> 1987;151:634-8.                                                                                                     | WRONG COMPARISON (different doses of the same medication are compared) |
| 71. | Ju H, Cong Z, Deng P. A control study on using pipothiazine palmitate to treat schizophrenic patients. <i>Journal of Clinical Psychological Medicine</i> 2000;10(1):24-5.                                                                                                                                                                                       | WRONG POPULATION (patients requiring treatment for acute symptoms)     |
| 72. | Kahn et al. Efficacy and tolerability of intramuscular followed by oral remoxipride and haloperidol in psychosis: A double blind controlled multicenter trial. <i>European Neuropsychopharmacology</i> 1993;3, 382-383                                                                                                                                          | WRONG INTERVENTION (LAIs not included)                                 |
| 73. | Kane J, Quitkin F, Rifkin A, Klein DF. Comparison of the incidence and severity of extrapyramidal side effects with fluphenazine enanthate and fluphenazine decanoate. <i>American Journal of Psychiatry</i> 1978;135:1539-42.                                                                                                                                  | WRONG DESIGN (short follow-up)                                         |
| 74. | Kane JM, Rifkin A, Woerner M, Reardon G. Low-dose neuroleptics in outpatient schizophrenics. <i>Psychopharmacology Bulletin</i> 1982;18(1):20-1.                                                                                                                                                                                                                | WRONG COMPARISON (different doses of the same medication are compared) |
| 75. | Kane et al. Fluphenazine vs placebo in patients with remitted, acute first-episode schizophrenia. <i>Archives of General Psychiatry</i> 1982;39(1): 70-73.                                                                                                                                                                                                      | WRONG INTERVENTION (fluphenazine LAI & OS vs. placebo)                 |
| 76. | Kane et al. Low dose fluphenazine decanoate in maintenance treatment of schizophrenia. <i>Psychiatry Res.</i> 1979;1(3):341-348. doi:10.1016/0165-1781(79)90016-7                                                                                                                                                                                               | WRONG DESIGN (discontinuation study)                                   |
| 77. | Keks et al. Long-acting injectable risperidone v. olanzapine tablets for schizophrenia or schizoaffective disorder. Randomised, controlled, open-label study. <i>Br J Psychiatry</i> 2007;191:131-9. <a href="http://Clinicaltrials.gov">Clinicaltrials.gov</a> : NCT00236457                                                                                   | WRONG POPULATION (patients requiring treatment for acute symptoms)     |
| 78. | Keskiner A, Itil T, Han H, Hsu W, Ulett G. EEG changes after fluphenazine enanthate and decanoate based on analog power spectra and digital computer period analysis. <i>Psychopharmacologia</i> 1971;20(3):230-41. [MEDLINE: 71275801]                                                                                                                         | WRONG DESIGN (short follow-up)                                         |
| 79. | Khazaie H, Shakeri J. Comparative efficacy of every 2 weeks versus every 6 weeks injections of fluphenazine decanoate. <i>Archives of Iranian Medicine</i> 2005;8(2):109-14.                                                                                                                                                                                    | WRONG COMPARISON (different doses of the same medication are compared) |

|     |                                                                                                                                                                                                                                                                                                      |                                                                                                                           |
|-----|------------------------------------------------------------------------------------------------------------------------------------------------------------------------------------------------------------------------------------------------------------------------------------------------------|---------------------------------------------------------------------------------------------------------------------------|
| 80. | Kim et al. Once-monthly paliperidone palmitate compared with conventional and atypical daily oral antipsychotic treatment in patients with schizophrenia. <i>CNS Spectr.</i> 2016;21(6):466-477 (clinicaltrials.gov: NCT02918825)                                                                    | WRONG COMPARISON (LAI vs. mixed oral APs)                                                                                 |
| 81. | Kinross-Wright J, Charalampous KD. A controlled study of a very long-acting phenothiazine preparation. <i>International Journal of Neuropsychiatry</i> 1965; 1:66-70. (HANDSEARCHED)                                                                                                                 | WRONG DESIGN (short follow-up: 6 weeks)                                                                                   |
| 82. | Knudsen P, Hansen LB, Auken G, Waehrens J, Hojholdt K, Larsen NE. Perphenazine decanoate vs perphenazine enanthate efficacy and side effects in a 6 week double-blind, comparative study of 50 drug monitored psychotic patients. <i>Acta Psychiatrica Scandinavica</i> 1985;72(supp 322):15-28.     | WRONG DESIGN (short follow-up: 6 weeks)                                                                                   |
| 83. | Kramer et al. Paliperidone palmitate, a potential long-acting treatment for patients with schizophrenia. Results of a randomized, double-blind, placebo-controlled efficacy and safety study. <i>International Journal of Neuropsychopharmacology</i> 2009;13, 1-13                                  | WRONG POPULATION (patients requiring treatment for acute symptoms)                                                        |
| 84. | Kreisman D, Blumenthal R, Borenstein M, Woerner M, Kane J, Rifkin A, et al. Family attitudes and patient social adjustment in a longitudinal study of outpatient schizophrenics receiving lowdose neuroleptics: the family's view. <i>Psychiatry</i> 1988;51(1):3-13. [MEDLINE: 88218101]            | WRONG COMPARISON (different doses of the same medication are compared)                                                    |
| 85. | Kurland AA, Richardson JH. A comparative study of two long acting phenothiazine preparations, fluphenazine enanthate and fluphenazine decanoate. <i>Psychopharmacologia (Berl)</i> 1966;9:320-7.                                                                                                     | WRONG COMPARISON (two formulations of the same medication are compared: Fluphenazine decanoate vs. Fluphenazine enantate) |
| 86. | Lauriello et al. An 8-week, double-blind, randomized, placebo-controlled study of olanzapine long-acting injection in acutely ill patients with schizophrenia. <i>J Clin Psychiatry</i> 2008;69(5):790-9.                                                                                            | WRONG POPULATION (patients requiring treatment for acute symptoms)                                                        |
| 87. | Lehmann E, Quadbeck H, Tegeler J, Fararuni M, Heinrich K. Drug-response differences of high and standard dosage of fluphenazine-decanoate in relation to schizophrenic symptoms. <i>Pharmakopsychiatrie und Neuropsychopharmakologie</i> 1980;13(3):117-29.                                          | WRONG COMPARISON (different doses of the same medication are compared)                                                    |
| 88. | Levenson AJ, Burnett GB, Nottingham JD, Sermas CE, Thornby JI. Speed and rate of remission in acute schizophrenia: a comparison of intramuscularly administered fluphenazine HC1 with thiothixene and haloperidol. <i>Current Therapeutic Research Clinical and Experimental</i> 1976;20(5):695-700. | WRONG DESIGN (short follow-up: 21 days)                                                                                   |
| 89. | Li et al. A comparative randomized, open-label, rater-blinded study of paliperidone palmitate and risperidone long-acting injectable therapy in patients with schizophrenia." <i>International Journal of Neuropsychopharmacology</i> 2010;13: 167-167.                                              | WRONG POPULATION (patients requiring treatment for acute symptoms)                                                        |
| 90. | MacCrimmon DJ, Saxena B, Foley P, Grof P. Fluphenazine decanoate and fluphenazine enanthate in the out-patient management of chronic schizophrenia. <i>Neuropsychobiology</i> 1978;4:360-5.                                                                                                          | WRONG COMPARISON (two formulations of the same medication are compared: Fluphenazine decanoate vs. Fluphenazine enantate) |
| 91. | Magnus RV. A comparative study of fluspirilene and fluphenazine decanoate in schizophrenic patients. <i>Journal of Pharmacotherapy</i> 1979;2(3):109-14.                                                                                                                                             | WRONG POPULATION (patients requiring treatment for acute symptoms)                                                        |
| 92. | Malla et al. An Exploratory, Open-Label, Randomized Trial Comparing Risperidone Long-Acting Injectable with Oral Antipsychotic Medication in the Treatment of Early Psychosis. <i>Clin Schizophr Relat Psychoses.</i> 2016;9(4):198-208. doi: 10.3371/CSRP.MACH.061213. (HANDSEARCHED)               | WRONG COMPARISON (LAI vs. mixed oral APs)                                                                                 |
| 93. | Malla et al. An open-label randomized trial comparing risperidone long acting injectable (RLAI) with oral antipsychotic medication in the treatment of early psychosis. <i>Early Intervention in Psychiatry</i> 2012;6: 100-100.                                                                     | WRONG COMPARISON (LAI vs. mixed oral APs)                                                                                 |
| 94. | Mallikaarjun et al. Pharmacokinetics, tolerability and safety of aripiprazole once-monthly in adult schizophrenia: an open-label, parallel-arm, multiple-dose study. <i>Schizophr Res</i> 2013;150(1): 281-288.                                                                                      | WRONG COMPARISON (different LAI doses are compared)                                                                       |
| 95. | Malm U, Perris C, Rapp W, Wedren G. A multicenter controlled trial of fluspirilene and fluphenazine enanthate in chronic schizophrenic syndromes. <i>Acta Psychiatrica Scandinavica Supplementum</i> 1974;249:94-116.                                                                                | WRONG COMPARISON (fluspirilene)                                                                                           |
| 96. | Manli et al. A randomized, 13-week study assessing the efficacy and safety of paliperidone palmitate and olanzapine in first-episode schizophrenic patients. <i>European Neuropsychopharmacology</i> 2015;25: S486-S487.                                                                             | WRONG POPULATION (patients requiring treatment for acute symptoms)                                                        |
| 97. | Marder SR, Van Putten T, Mintz J, Lebell M, McKenzie J, May PRA. Low and conventional dose maintenance therapy with fluphenazine decanoate. <i>Archives of General Psychiatry</i> 1987;44:518-21.                                                                                                    | WRONG COMPARISON (different doses of the same medication are compared)                                                    |

|     |                                                                                                                                                                                                                                                                                                                                         |                                                                        |
|-----|-----------------------------------------------------------------------------------------------------------------------------------------------------------------------------------------------------------------------------------------------------------------------------------------------------------------------------------------|------------------------------------------------------------------------|
| 98. | Markowitz et al. Long-acting injectable paliperidone palmitate versus oral paliperidone extended release: a comparative analysis from two placebo-controlled relapse prevention studies. <i>Ann Gen Psychiatry</i> 2013;12(1): 22.                                                                                                      | WRONG DESIGN (post-hoc analysis)                                       |
| 99. | Martyns-Yellowe IS. The decanoates of flupenthixol and clopenthixol in the treatment of chronic schizophrenic inpatients implications for community psychiatry. <i>West African Journal of Medicine</i> 1993;12(2):110-2.                                                                                                               | WRONG POPULATION ("drug free" patients were included)                  |
| 100 | McClelland H, Farquharson RG, Leyburn P, Furness JA, SchiG AA. Very high dose fluphenazine decanoate. <i>Archives of General Psychiatry</i> 1976;33:1435-9                                                                                                                                                                              | WRONG COMPARISON (different doses of the same medication are compared) |
| 101 | McCreadie RG, Flanagan WL, McKnight J, Jorgensen A. High dose flupenthixol decanoate in chronic schizophrenia. <i>British Journal of Psychiatry</i> 1979;135:175-9.                                                                                                                                                                     | WRONG COMPARISON (different doses of the same medication are compared) |
| 102 | Meltzer et al. A randomized, double-blind, placebo-controlled trial of aripiprazole lauroxil in acute exacerbation of schizophrenia. <i>J Clin Psychiatry</i> . 2015;76(8):1085-90.                                                                                                                                                     | WRONG POPULATION (patients requiring treatment for acute symptoms)     |
| 103 | Millar J, Daniel GR. A trial of fluphenazine enanthate in chronic schizophrenia. <i>The British Journal of Psychiatry</i> 1967;113(505): 1431-1432.                                                                                                                                                                                     | WRONG DESIGN (observational study)                                     |
| 104 | Muser et al. Cost effectiveness of paliperidone palmitate versus oral antipsychotics in patients with schizophrenia and a history of criminal justice involvement. <i>J Med Econ</i> 2015: 1-9.                                                                                                                                         | WRONG DESIGN (cost-analysis of the a randomized trial)                 |
| 105 | Nasrallah et al. Effect of Aripiprazole Lauroxil on Metabolic and Endocrine Profiles and Related Safety Considerations Among Patients With Acute Schizophrenia. <i>J Clin Psychiatry</i> 2016;77(11):1519-1525. doi: 10.4088/JCP.15m10467. SECONDARY PUBLICATION of Meltzer 2015                                                        | WRONG POPULATION (patients requiring treatment for acute symptoms)     |
| 106 | Nasser et al. Efficacy, Safety, and Tolerability of RBP-7000 Once-Monthly Risperidone for the Treatment of Acute Schizophrenia: An 8-Week, Randomized, Double-Blind, Placebo-Controlled, Multicenter Phase 3 Study. <i>J Clin Psychopharmacol</i> . 2016;36(2):130-40. SECONDARY PUBLICATION of Isitt 2016                              | WRONG POPULATION (patients requiring treatment for acute symptoms)     |
| 107 | NCT01567527. 52-week, Multicenter, Randomized, Double-blind, Placebo-controlled Study to Evaluate the Efficacy, Safety, and Tolerability of an Intramuscular Depot Formulation of Aripiprazole (OPC-14597) as Maintenance Treatment in Patients With Bipolar I Disorder. Last updated: 2012. (HANDSEARCHED)                             | WRONG POPULATION (bipolar patients)                                    |
| 108 | NCT02282085 Treatment Study Comparing Aripiprazole Once Monthly With Standard of Care Medication in Outpatients With Schizophrenia. Last updated: 2015                                                                                                                                                                                  | WRONG COMPARISON (LAI vs. mixed oral APs)                              |
| 109 | Nylander et al. The effect of previous dose of oral aripiprazole (10 or 30 mg/day) on the efficacy and tolerability of aripiprazole once-monthly: Post-hoc analysis of two double-blind, randomized, controlled trials. <i>International Journal of Neuropsychopharmacology</i> 2014;17:149-150.                                        | WRONG DESIGN (post-hoc analysis)                                       |
| 110 | Ohkuma et al. A phase III study of KD-136 (haloperidol decanoate: a long-acting neuroleptic) in the treatment of schizophrenia - The detailed analysis of multi-clinical double-blind comparative study of haloperidol decanoate with oral haloperidol preparation. <i>Rinsho Hyoka (Clin. Eval.)</i> 1987; 15(1):37-72. (HANDSEARCHED) | WRONG POPULATION (patients requiring treatment for acute symptoms)     |
| 111 | Pandina G. A Randomized, Placebo-Controlled Study to Assess the Efficacy and Safety of 3 Doses of Paliperidone Palmitate in Adults With Acutely Exacerbated Schizophrenia (vol 30, pg 235, 2010). <i>Journal of Clinical Psychopharmacology</i> 2010;30(4): 364-364.                                                                    | WRONG POPULATION (patients requiring treatment for acute symptoms)     |
| 112 | Pandina et al. A double-blind study of paliperidone palmitate and risperidone long-acting injectable in adults with schizophrenia. <i>Prog Neuropsychopharmacol Biol Psychiatry</i> 2011;35(1): 218-226.                                                                                                                                | WRONG POPULATION (patients requiring treatment for acute symptoms)     |
| 113 | Potkin SG, Preda A. Aripiprazole once-monthly long-acting injectable for the treatment of schizophrenia. <i>Expert Opin Pharmacother</i> 2016;17(3):395-407. doi: 10.1517/14656566.2015.1114100.                                                                                                                                        | WRONG DESIGN (systematic review)                                       |
| 114 | Quiroz et al. Randomized, placebo-controlled, long-term study of risperidone long-acting injectable in relapse prevention in bipolar I disorder patients. <i>Bipolar Disorders</i> 2009;11: 71-71.                                                                                                                                      | WRONG POPULATION (bipolar patients)                                    |
| 115 | Ravaris et al. A controlled study of fluphenazine enanthate in chronic schizophrenic patients. <i>Diseases of the Nervous System</i> 1965;25:33-9. (HADSEARCHED)                                                                                                                                                                        | WRONG DESIGN (not randomized)                                          |
| 116 | Robak OH. Pipothiazine palmitate in the long-term treatment of chronic psychoses. A controlled trial on inpatients. <i>Acta Psychiatrica Scandinavica</i> 1973;244:83-94.                                                                                                                                                               | WRONG COMPARISON (LAI vs. mixed oral APs)                              |
| 117 | Rosenheck et al. Long-acting risperidone and oral antipsychotics in unstable schizophrenia. <i>N Engl J Med</i> 2011;364(9): 842-851.                                                                                                                                                                                                   | WRONG COMPARISON (LAI vs. mixed oral APs)                              |

|     |                                                                                                                                                                                                                                                                                                          |                                                                        |
|-----|----------------------------------------------------------------------------------------------------------------------------------------------------------------------------------------------------------------------------------------------------------------------------------------------------------|------------------------------------------------------------------------|
| 118 | Russell N, Landmark J, Merskey H, Turpin T. A double-blind comparison of fluspirilene and fluphenazine decanoate in schizophrenia. <i>Canadian Journal of Psychiatry</i> 1982;27:593-6.                                                                                                                  | WRONG POPULATION (patients requiring treatment for acute symptoms)     |
| 119 | Schooler NR, Levine J, NIMH-PRB Collaborative Fluphenazine Study Group. The initiation of long-term pharmacotherapy in schizophrenia: dosage and side effect comparisons between oral and depot fluphenazine. <i>Pharmakopsychiatria</i> 1976;9(4):159-69.                                               | WRONG POPULATION (patients requiring treatment for acute symptoms)     |
| 120 | Schooler NR, Levine J, Severe JB. Depot fluphenazine in the prevention of relapse in schizophrenia: evaluation of a treatment regimen. <i>Psychopharmacology Bulletin</i> 1979;15(2):44-7                                                                                                                | WRONG POPULATION (patients requiring treatment for acute symptoms)     |
| 121 | Schooler NR, Keith SJ, Sever JB, Matthews SM, Bellack AS, Glick ID, et al. Relapse and rehospitalisation during maintenance treatment of schizophrenia: the effects of dose reduction and family treatment. <i>Archives of General Psychiatry</i> 1997;54(5):453-63.                                     | WRONG COMPARISON (different doses of the same medication are compared) |
| 122 | Schooler NR. Risperidone long-acting injection vs. oral risperidone: Analysis of relapse and rehospitalization controlling for switching in a pragmatic trial. <i>Schizophrenia Bulletin</i> 2015;41, S333.                                                                                              | WRONG COMPARISON (LAI vs. mixed oral APs)                              |
| 123 | Schreiner et al. The effect of long-acting paliperidone palmitate once-monthly on negative and depressive symptoms in patients with schizophrenia switched from previous unsuccessful treatment with oral aripiprazole. <i>Ther Adv Psychopharmacol.</i> 2017;7(2):59-65.                                | WRONG DESIGN (post-hoc analysis of an interventional single-arm trial) |
| 124 | Shenoy et al. Effects of a six-week drug holiday on symptom status, relapse, and tardive dyskinesia in chronic schizophrenics. <i>Journal of Clinical Psychopharmacology</i> 1981;1:141-5.                                                                                                               | WRONG DESIGN (short follow-up: 6 weeks)                                |
| 125 | Shu L. Double-blind study of domestic penfluridol and fluphenazine decanoate. <i>Chung Hua Shen Ching Ching Shen Ko Tsa Chih (Chinese Journal of Neurology and Psychiatry)</i> 1983;16(3):141-5                                                                                                          | WRONG DESIGN (short follow-up: 6 weeks)                                |
| 126 | Tegeler J, Floru L. A comparative study of the longacting neuroleptics perphenazin enanthate and fluspirilene [Eine Vergleichende Untersuchung Der Depot-Neuroleptika Perphenazin Onanthat Und Fluspirilen]. <i>PharmakopsychiatrieNeuropsychopharmakologie</i> 1979;12(5):357-65. [EMBASE 1980018158]   | WRONG COMPARISON (fluspirilene)                                        |
| 127 | Van Praag et al. A controlled comparative study of Fluphenazine and Fluphenazine Enanthate in acute and chronic psychotic patients. <i>Psychiatria, Neurologia, neurochirurgia</i> 1970;73, 165-175.                                                                                                     | WRONG POPULATION (patients requiring treatment for acute symptoms)     |
| 128 | Van Praag HM, Dols LCW. Fluphenazine enanthate and fluphenazine decanoate: A comparison of their duration of action and motor side effects. <i>American Journal of Psychiatry</i> 1973;130(7):801-4.                                                                                                     | WRONG DESIGN (short follow-up: 4 weeks)                                |
| 129 | Vereecken JLTH, Tanghe A. Fluspirilene and pipothiazine undecylenate, two long-acting injectable neuroleptics. <i>Psychiatria, Neurologia, Neurochirurgia</i> 1972;75:117-27.                                                                                                                            | WRONG DESIGN (short follow-up: 6 weeks)                                |
| 130 | Villeneuve A, Dogan K, Lachance R, Proulx C. A controlled study of fluspirilene in chronic schizophrenia. <i>Current Therapeutic Research, Clinical and Experimental</i> 1970;12(12):819-27.                                                                                                             | WRONG COMPARISON (fluspirilene)                                        |
| 131 | Weiden et al. A randomized controlled trial of long-acting injectable risperidone vs continuation on oral atypical antipsychotics for first-episode schizophrenia patients: initial adherence outcome. <i>Journal of Clinical Psychiatry</i> 2009;70, 1397-1406.<br>SECONDARY PUBLICATION of Weiden 2012 | WRONG COMPARISON (LAI vs. mixed oral APs)                              |
| 132 | Weiden et al. Maintenance treatment with long-acting injectable risperidone in first-episode schizophrenia: a randomized effectiveness study. <i>J Clin Psychiatry</i> 2012;73(9): 1224-1233.                                                                                                            | WRONG COMPARISON (LAI vs. mixed oral APs)                              |
| 133 | Winter K, Fullerton AG, Hussain K, Tarlo L. A comparative double-blind trial of fluspirilene and fluphenazine decanoate in the treatment of chronic schizophrenia. <i>Br J Clin Pract.</i> 1973;27(10):377-380                                                                                           | WRONG COMPARISON (fluspirilene)                                        |
| 134 | Wistedt B, Jorgensen A, Wiles D. A depot withdrawal study. Plasma concentration of fluphenazine and flupenthixol and relapse frequency. <i>Psychopharmacology</i> 1982;78:301-4.                                                                                                                         | WRONG INTERVENTION (fluphenazine + flupenthixol)                       |
| 135 | Wistedt B, Wiles D, Jorgensen A. A depot neuroleptic withdrawal study neurological effects. <i>Psychopharmacology</i> 1983;80(2):101-5.                                                                                                                                                                  | WRONG INTERVENTION (fluphenazine + flupenthixol)                       |

|     |                                                                                                                                                                                                                                                |                                                                       |
|-----|------------------------------------------------------------------------------------------------------------------------------------------------------------------------------------------------------------------------------------------------|-----------------------------------------------------------------------|
| 136 | Wistedt B, Ranta J. Comparative double-blind study of flupenthixol decanoate and fluphenazine decanoate in the treatment of patients relapsing in a schizophrenic symptomatology. Acta Psychiatria Scandanavica 1983;67:378-88.                | WRONG POPULATION<br>(patients requiring treatment for acute symptoms) |
| 137 | Yatham et al. A 6-month randomized open-label comparison of continuation of oral atypical antipsychotic therapy or switch to long acting injectable risperidone in patients with bipolar disorder. Acta Psychiatr Scand Suppl 2007;(434):50-6. | WRONG POPULATION<br>(bipolar patients)                                |

### Records studies awaiting assessment

|    |                                                                                                                                                                                                                                         |                                                                                     |
|----|-----------------------------------------------------------------------------------------------------------------------------------------------------------------------------------------------------------------------------------------|-------------------------------------------------------------------------------------|
| 1. | Czekalla et al. Randomised controlled clinical trials with oral and intramuscular olanzapine in the treatment of bipolar disorders - An analysis using criteria of evidence-based medicine (EbM). Pharmacopsychiatry 2002;35(5): II-II. | The reference is apparently wrong, there is no matching with the indicated journal. |
| 2. | Detke et al. Olanzapine long-acting injection: An 8-week double-blind, randomized, placebo-controlled study in acutely-ill patients with schizophrenia. International Journal of Neuropsychopharmacology 2008;11: 152-152.              | The reference is apparently wrong, there is no matching with the indicated journal. |
| 3. | Filip et al. [Oxyprothepin decanoate in maintenance therapy of schizophrenia--a double-blind, standardized controlled study]. Ceskoslovenska psychiatrie 1985;81, 6-14                                                                  | Not available after online research.                                                |
| 4. | Montgomery et al. Randomized, double-blind, placebo-controlled study of risperidone long-acting injectable in relapse prevention in patients with bipolar i disorder." European Psychiatry 2010:25.                                     | The reference is apparently wrong, there is no matching with the indicated journal. |
| 5. | Yi et al. Efficacy of flexible dose of paliperidone palmitate in the treatment of acute schizophrenia: A randomized, open, placebo-controlled study. Chinese Journal of New Drugs 2013;22(10): 1190-1195.                               | The reference is apparently wrong, there is no matching with the indicated journal. |

### List of ongoing studies

|    |                                                                                                                                                                                                |                                                             |
|----|------------------------------------------------------------------------------------------------------------------------------------------------------------------------------------------------|-------------------------------------------------------------|
| 1. | NCT03172871. Aripiprazole IM Depot in the Acute Treatment of Adults With Schizophrenia. Last updated: January 2020.                                                                            | Recruitment Status:<br>Completed.<br>No data available.     |
| 2. | CTRI/2012/04/002552. A clinical trial to study the effect of Olanzapine Long Acting Injection with Oral Olanzapine in Patients with Schizophrenia. Last modified on: April 2012 (HANDSEARCHED) | According to the protocol the study is open to recruitment. |

## Supplement E - Characteristics of included studies

Table. Characteristics of included studies. Legend: LAI=long-acting antipsychotics; OS=oral treatment; SCZ=schizophrenia; SCZ-AFF=schizo-affective disorder; OL=open-label; DB=double-blind; PANSS=Positive and Negative Syndrome Scale; BPRS= Brief Psychiatric Rating Scale; CGI=Clinical Global Impression; CPRS=Comprehensive Psychopathological Rating Scale; ICD=International Classification of Diseases; TSQM=Treatment Satisfaction Questionnaire for Medication; SBAS= Social Behaviour Assessment Schedule; SWN-K=subjective well-being under neuroleptic scale, short version; SES=Socio-Economic Status scales; PSE=Present State Examination; PSP=Personal and Social Performance; QLS=Quality of Life Scale; BMI=body mass index; DSM=Diagnostic and Statistical Manual of Mental Disorders; mg=milligrams; w=weeks; NR=not reported; NA=not applicable. Outcomes: A=relapse; B=acceptability; C=tolerability; D=efficacy (continuous); E=quality of life; F=hospitalization; G=functioning; H=weight gain; I=QTc prolongation; J=hyperprolactinaemia; K=extrapyramidal symptoms; L=sedation.

| First author, year                         | Treatment 1                 | Treatment 2      | Treatment 1 dose                                                               | Treatment 2 dose                                                               | N. patients | % women | Mean age (SD or range)                | Diagnosis (criteria employed)                                | Setting     | Country | Follow-up length | Blinding | Primary outcome                                            | Provided data for the following outcomes |
|--------------------------------------------|-----------------------------|------------------|--------------------------------------------------------------------------------|--------------------------------------------------------------------------------|-------------|---------|---------------------------------------|--------------------------------------------------------------|-------------|---------|------------------|----------|------------------------------------------------------------|------------------------------------------|
| <b>Studies comparing LAIs head-to-head</b> |                             |                  |                                                                                |                                                                                |             |         |                                       |                                                              |             |         |                  |          |                                                            |                                          |
| Albert 1980                                | fluphenazine LAI            | pipothiazine LAI | flexible mean 50 mg/2w                                                         | flexible mean 100 mg/4w                                                        | 33          | 0%      | About 45                              | SCZ (criteria unclear)                                       | inpatients  | Canada  | 12               | DB       | Multiple outcomes (mainly, BPRS subscales endpoint change) | B, C, D, K                               |
| Bechelli 1985                              | haloperidol LAI             | pipothiazine LAI | flexible 50-150 mg/4w; mean 100 mg/4w                                          | flexible 50-125 mg/4w; mean 65 mg/4w                                           | 41          | 0%      | 32 (19-43)                            | SCZ + schizotypal personality (Research Diagnostic Criteria) | outpatients | Brazil  | 24               | DB       | BPRS endpoint change                                       | A, B, C, D, H, K                         |
| <del>Chai 1998</del>                       | <del>pipothiazine LAI</del> | fluphenazine LAI | Flexible: 50-150 mg/4w                                                         | Flexible: 25-75 mg/4w                                                          | 209         | 39.2%   | 30                                    | SCZ (criteria unclear)                                       | inpatients  | China   | 12               | OL       | multiple outcomes                                          | None                                     |
|                                            |                             | haloperidol LAI  |                                                                                | Flexible: 50-150 mg/4w                                                         |             |         |                                       |                                                              |             |         |                  |          |                                                            |                                          |
| Chouinard 1978                             | fluphenazine LAI            | pipothiazine LAI | flexible: administered each 2w; median at 9 months = 50 mg (6.25-100 mg)/month | flexible: administered each 2w; median at 9 months = 75 mg (12.5-450 mg)/month | 32          | 50%     | FLU-LAI median 36; PIPO-LAI median 39 | SCZ (DSM-II)                                                 | outpatients | Canada  | 36               | DB       | multiple outcomes                                          | A, B, C, D, F, J, K                      |
| Chouinard 1984                             | haloperidol LAI             | fluphenazine LAI | flexible 15-900 mg/4w (median 225 mg/4w)                                       | flexible 2,5-300 mg/2w (median 75 mg/2w)                                       | 72          | 50%     | NR                                    | SCZ (DSM-III)                                                | outpatients | Canada  | 32               | DB       | BPRS and CGI endpoint change                               | None                                     |



|                       |                  |                    |                            |                            |     |       |                                      |                                                                                                                                                                                 |             |          |    |    |                       |                        |
|-----------------------|------------------|--------------------|----------------------------|----------------------------|-----|-------|--------------------------------------|---------------------------------------------------------------------------------------------------------------------------------------------------------------------------------|-------------|----------|----|----|-----------------------|------------------------|
| <b>Chowdhury 1980</b> | flupenthixol LAI | fluphenazine LAI   | flexible (no details)      | flexible (no details)      | 26  | 36%   | 40 males; 43 females                 | SCZ (criteria unclear)                                                                                                                                                          | outpatients | UK       | 12 | DB | multiple outcomes     | None                   |
| <b>Cookson 1985</b>   | fluphenazine LAI | haloperidol LAI    | flexible 12,5-37,5 mg/2-6w | flexible 100-200 mg/2-6w   | 19  | 52.6% | 42,8 (NR)                            | SCZ (criteria unclear); BMI>25                                                                                                                                                  | outpatients | UK       | 52 | NR | BMI endpoint change   | A, B, C, J             |
| <b>Cuomo 2018</b>     | aripiprazole LAI | paliperidone LAI-1 | fixed 400 mg/4w            | fixed 100 mg/4w            | 101 | 13%   | 31,9 (12,1)                          | SCZ spectrum/bipolar disorder with psychotic features (DSM-5) + DSM-5 substance use disorder. Note: 11% of patients had a diagnosis of bipolar disorder with psychotic features | inpatients  | Italy    | 52 | OL | CGI endpoint change   | A, B, C, D, E, F, J, K |
| <b>Dencker 1973</b>   | fluphenazine LAI | pipothiazine LAI   | flexible: mean 16.2 mg/4w  | flexible: mean 145.7 mg/4w | 67  | 20.9% | 40.2 pipothiazine; 42.1 fluphenazine | SCZ (criteria unclear)                                                                                                                                                          | mixed       | Sweden   | 52 | DB | multiple outcomes     | A, B, C, D, K          |
| <b>Dencker 1980</b>   | flupenthixol LAI | clopenthixol LAI   | flexible                   | flexible                   | 60  | 21.7% | 40.4                                 | SCZ (criteria similar to the Schneiderian criteria)                                                                                                                             | outpatients | Sweden   | 52 | DB | multiple outcomes     | A, C, D, K, L          |
| <b>Dencker 1994</b>   | haloperidol LAI  | perphenazine LAI   | flexible: mean 120 mg/3w   | flexible: mean 117 mg/3w   | 29  | 31%   | 43.8 (22-62)                         | SCZ (DSM-III-R; ICD-9 295)                                                                                                                                                      | mixed       | Sweden   | 24 | DB | CPRS endpoint change  | None                   |
| <b>Eberhard 1986</b>  | haloperidol LAI  | flupenthixol LAI   | flexible 25-300mg/4w       | flexible 10-120 mg/4w      | 32  | 46.9% | 38                                   | SCZ (DSM-III)                                                                                                                                                                   | mixed       | NR       | 48 | DB | CPRS endpoint change  | A, B, D                |
| <b>Eufe 1979</b>      | flupenthixol LAI | perphenazine LAI   | fixed 20 mg/2w             | fixed 100 mg/2w            | 32  | 12.5% | 28-63                                | SCZ (ICD-9)                                                                                                                                                                     | outpatients | Germany  | 12 | NR | NR                    | B, D, K                |
| <b>Feng 1990</b>      | haloperidol LAI  | fluphenazine LAI   | fixed 25 mg/4w             | fixed 25 mg/2w             | 30  | 20%   | 40.4 (25-54)                         | SCZ (Huangshan council schizophrenia standard 1984)                                                                                                                             | NR          | China    | 12 | DB | CGI endpoint change   | B, D, K                |
| <b>Hirsch 1978</b>    | flupenthixol LAI | fluphenazine LAI   | NR                         | NR                         | 57  | NR    | NR                                   | SCZ (PSE criteria)                                                                                                                                                              | outpatients | UK       | 26 | DB | multiple outcomes     | None                   |
| <b>Hranov 1998</b>    | haloperidol LAI  | fluphenazine LAI   | Flexible: mean 99.3 mg/4w  | Flexible: mean 47.3 mg/2w  | 41  | 58.5% | 41.3                                 | SCZ (ICD-10 F20)                                                                                                                                                                | NR          | Bulgaria | 26 | NR | PANSS endpoint change | B, K                   |
| <b>Jain 1975</b>      | fluphenazine LAI | pipothiazine LAI   | flexible: mean 125 mg/2w   | flexible: mean 250 mg/2w   | 30  | 46.7% | 49 (24-61)                           | SCZ (criteria unclear)                                                                                                                                                          | Inpatients  | Canada   | 20 | DB | BPRS endpoint change  | A, B, D                |

|                       |                    |                    |                                                                 |                                                                 |     |         |                                               |                           |             |           |     |    |                                                               |                        |
|-----------------------|--------------------|--------------------|-----------------------------------------------------------------|-----------------------------------------------------------------|-----|---------|-----------------------------------------------|---------------------------|-------------|-----------|-----|----|---------------------------------------------------------------|------------------------|
| <b>Javed 1991</b>     | flupenthixol LAI   | fluphenazine LAI   | fixed: mean 40 mg/2w                                            | fixed: mean 25 mg/2w                                            | 38  | 11.1%   | 50                                            | SCZ (DSM-III)             | outpatients | Pakistan  | 12  | DB | CGI endpoint change                                           | D, K                   |
| <b>Kelly 1977</b>     | flupenthixol LAI   | fluphenazine LAI   | fixed 20-40 mg/3w                                               | fixed 25 mg, 50 mg/3w                                           | 60  | unclear | 41.9                                          | SCZ (criteria unclear)    | outpatients | UK        | 39  | DB | BPRS endpoint change                                          | A, B, C, K             |
| <b>Kissling 1985</b>  | haloperidol LAI    | fluphenazine LAI   | flexible 68 mg/4w at the end of the study                       | flexible 10 mg/2w at the end of the study                       | 54  | 74%     | 33 (sd 11.5)                                  | SCZ (ICD 295,-)           | NR          | Germany   | 26  | DB | multiple outcomes                                             | A, B, C, D             |
| <b>Koshikawa 2016</b> | risperidone LAI    | paliperidone LAI-1 | flexible upper limit 50 mg/2w                                   | flexible upper limit 150 mg/4w                                  | 30  | 48.2%   | 45 (sd 10.9)                                  | SCZ + SCZ-AFF (DSM-IV-TR) | inpatients  | Japan     | 26  | OL | SFS endpoint change                                           | A, B, C, D, E, G       |
| <b>Lapierre 1983</b>  | fluphenazine LAI   | pipothiazine LAI   | Males: mean 65.17 (6.25 to 150); females: 49.21 (12.5 to 125.0) | Males: mean 76.38 /12.5 to 150); females: 78.9 (18.75 to 112.5) | 43  | 46.5%   | FLU-LAI: 36.5 (19-56); PIPO-LAI: 31.3 (21-49) | SCZ (DSM-III)             | outpatients | Canada    | 52  | DB | AMDP Psychopathology Scale endpoint change                    | None                   |
| <b>Leong 1989</b>     | fluphenazine LAI   | pipothiazine LAI   | flexible mean 19,4 mg/4w. Range: 12,5-50 mg/4w                  | flexible mean 39,8 mg/4w. Range mean 25-50 mg/4w                | 60  | 55%     | 37.8 (se 1.87)                                | SCZ (ICD 295,-)           | outpatients | Singapore | 28  | DB | multiple outcomes                                             | A, B, C, D, K          |
| <b>Lundin 1992</b>    | fluphenazine LAI   | flupenthixol LAI   | flexible mean 21 mg/4w                                          | flexible mean 82 mg/4w                                          | 58  | 20.7%   | 35                                            | SCZ (DSM-III)             | outpatients | Sweden    | 26  | DB | multiple outcomes                                             | A, B, D                |
| <b>McEvoy 2014</b>    | paliperidone LAI-1 | haloperidol LAI    | flexible 39-234 mg/4w                                           | flexible 25-200 mg/4w                                           | 311 | 25.5%   | 44 (sd 12.5)                                  | SCZ + SCZ-AFF (DSM-IV-TR) | outpatients | US        | 104 | DB | Efficacy failure (rated by an Outcome Adjudication Committee) | A, B, C, D, F, H, J, K |
| <b>McKane 1987</b>    | haloperidol LAI    | fluphenazine LAI   | flexible mean 127 mg/4w                                         | flexible mean 106 mg/4w                                         | 38  | 42%     | 56 (NR)                                       | SCZ (Feighner criteria)   | inpatients  | Scotland  | 60  | DB | Relapse rate                                                  | A, B                   |
| <b>McLaren 1992</b>   | bromperidol LAI    | fluphenazine LAI   | flexible mean 242 mg/4w                                         | flexible mean 103 mg/4w                                         | 47  | 42.6%   | 46.2 (sd 11.4)                                | SCZ (ICD-9)               | outpatients | UK        | 52  | DB | Relapse rate                                                  | A, B, C, L             |
| <b>Pinto 1979</b>     | fluphenazine LAI   | flupenthixol LAI   | flexible mean 25 mg/3w                                          | flexible mean 36.6 mg/3w                                        | 64  | NR      | NR                                            | SCZ (criteria unclear)    | outpatients | UK        | 78  | DB | BPRS endpoint change                                          | B, C, D, K             |

|                                   |                    |                    |                                 |                                   |      |         |                                |                                                         |             |                                                                                              |          |    |                                         |                                 |
|-----------------------------------|--------------------|--------------------|---------------------------------|-----------------------------------|------|---------|--------------------------------|---------------------------------------------------------|-------------|----------------------------------------------------------------------------------------------|----------|----|-----------------------------------------|---------------------------------|
| <b>Potkin 2017</b>                | aripiprazole LAI   | paliperidone LAI-1 | flexible 300-400 mg/4w          | flexible 78-234 mg/4w             | 295  | 40.2%   | 41.9 (sd 10.8)                 | SCZ (DSM-IV-TR)                                         | outpatients | Multicenter (Canada, Czech Republic, Estonia, France, Italy, Germany, Spain, Sweden, UK, US) | 28       | OL | QLS endpoint change                     | A, B, C, D, E, H, K             |
| <b>Rossi 1990</b>                 | bromperidol LAI    | fluphenazine LAI   | flexible 85 mg/4w               | flexible 30 mg/4w                 | 30   | 40%     | 29.3 (19-42)                   | SCZ (DSM-III-R)                                         | mixed       | Italy                                                                                        | 26       | DB | multiple outcomes                       | A, B, C, D, K                   |
| <b>Rossi 1992</b>                 | bromperidol LAI    | haloperidol LAI    | flexible mean 164 mg/4w         | flexible mean 119 mg/4w           | 20   | 55%     | 48 (34-68)                     | SCZ (DSM-III-R)                                         | inpatients  | Italy                                                                                        | 52       | DB | multiple outcomes                       | A, B, C, D, H, K                |
| <b>Savitz 2016</b>                | paliperidone LAI-1 | paliperidone LAI-3 | fixed 50, 75, 100, or 150 mg/4w | fixed 175, 263, 350, or 525 mg/4w | 1016 | 48%     | 38.7 (12)                      | SCZ (DSM-IV)                                            | mixed       | Multicenter (26 countries)                                                                   | 48       | DB | Relapse according to composite criteria | A, B, C, D, F, G, H, I, J, K, L |
| <del><b>Schlesberg 1979</b></del> | fluphenazine LAI   | placebo            | Flexible 6.25-50 mg/4w          | NA                                | 75   | NR      | 41.6 (sd 10.6)                 | SCZ (criteria unclear); "highly resistant to treatment" | inpatients  | Israel                                                                                       | 36       | DB | multiple outcomes                       | A, B, C, K                      |
| <b>Schneider 1981</b>             | fluphenazine LAI   | pipothiazine LAI   | flexible 12.5-100 mg/2-5w       | Flexible 50-400 mg/2-5w           | 59   | 13.5%   | 44.5 (22-61)                   | SCZ (DSM-II)                                            | outpatients | US                                                                                           | 16 to 32 | DB | Blood laboratory values                 | None                            |
| <b>Sharma 1991</b>                | fluphenazine LAI   | haloperidol LAI    | Fixed 100 mg/4w                 | Fixed 100 mg/4w                   | 59   | 42.4%   | 52 (30-81)                     | SCZ (DSM-III)                                           | NR          | UK                                                                                           | 48       | DB | multiple outcomes                       | A, B, K                         |
| <b>Simon 1978</b>                 | fluphenazine LAI   | pipothiazine LAI   | flexible: mean 88 mg/3w         | flexible: mean 90 mg/25 days      | 118  | 34.7%   | 30% 20-29; 37% 30-39; 33% > 40 | SCZ (official French classification)                    | inpatients  | France                                                                                       | 78       | OL | multiple outcomes                       | A, B, C, D, K                   |
| <b>Singh 1979</b>                 | fluphenazine LAI   | pipothiazine LAI   | Flexible: mean 44.2 mg/4w       | Flexible: mean 125 mg/4w          | 30   | 20%     | 44 (29-59)                     | SCZ (DSM-II)                                            | Outpatients | Canada                                                                                       | 44       | DB | BPRS endpoint change                    | B, D, K                         |
| <b>Song 1993</b>                  | fluphenazine LAI   | pipothiazine LAI   | unclear                         | unclear                           | 109  | unclear | unclear                        | SCZ (criteria unclear)                                  | outpatients | China                                                                                        | 24       | NR | multiple outcomes                       | A, B, C                         |
| <b>Steinert 1986</b>              | flupenthixol LAI   | pipothiazine LAI   | flexible 20-40 mg/2w            | flexible 25-100 mg/4w             | 39   | 38.5%   | 42.4 (11.5)                    | SCZ (operational definition Priest Steinert 1977)       | inpatients  | UK                                                                                           | 52       | DB | BPRS endpoint change                    | A, B, C, D, K                   |
| <b>Walker 1983</b>                | fluphenazine LAI   | clopenthixol LAI   | flexible mean 24.8 mg/3-4w      | flexible mean 220 mg/3-4w         | 39   | NR      | 45 (23-67)                     | SCZ (criteria unclear)                                  | outpatients | UK                                                                                           | 24       | DB | multiple outcomes                       | A, B, C, D, F, K, L             |

|                                                       |                    |                    |                         |                                        |     |       |              |                                                                                    |             |                                            |     |    |                                   |                           |
|-------------------------------------------------------|--------------------|--------------------|-------------------------|----------------------------------------|-----|-------|--------------|------------------------------------------------------------------------------------|-------------|--------------------------------------------|-----|----|-----------------------------------|---------------------------|
| <b>Wistedt 1991</b>                                   | haloperidol LAI    | zuclopenthixol LAI | flexible 38-200 mg/4w   | flexible 100-600 mg/4w                 | 64  | 54.1% | 38 (21-61)   | SCZ (DSM-III) and 18-item BPRS between 5 and 26                                    | outpatients | Finland, Sweden                            | 36  | DB | CGI endpoint change               | A, B, C, D, K             |
| <b>Wistedt 1984</b>                                   | fluphenazine LAI   | haloperidol LAI    | flexible 25-300 mg/4w   | flexible 25-300 mg/4w                  | 51  | 35.3% | 37.3 (NR)    | SCZ, chronic (Research Diagnostic Criteria)                                        | inpatients  | Multicenter                                | 20  | DB | CPRS endpoint change              | A, B, C, D, H, J, K       |
| <b>Woggon 1977</b>                                    | fluphenazine LAI   | pipothiazine LAI   | flexible 25-37.5 mg/3w  | flexible starting from 100 mg/4w       | 61  | 41%   | 21-79        | SCZ (ICD, version not specified)                                                   | outpatients | Germany                                    | 26  | DB | multiple outcomes                 | B                         |
| <b>Studies comparing LAIs vs. oral antipsychotics</b> |                    |                    |                         |                                        |     |       |              |                                                                                    |             |                                            |     |    |                                   |                           |
| <b>Bai 2007</b>                                       | risperidone LAI    | risperidone OS     | flexible 25-50 mg/2w    | flexible 1-8 mg/day                    | 50  | 50%   | 46.4 (11.9)  | SCZ (DSM-IV)                                                                       | inpatients  | Taiwan                                     | 52  | OL | PANSS endpoint change             | A, B, C, D, E, G, K       |
| <b>Barnes 1983</b>                                    | fluphenazine LAI   | pimozide OS        | fixed 25 mg/2w          | fixed: 8 mg/day                        | 36  | 50%   | 49.4 (10.01) | SCZ (Syndrome Check List of the Present State Examination 9 <sup>th</sup> edition) | outpatients | UK                                         | 52  | DB | SBAS endpoint change              | A, B, F, G                |
| <b>Bozzatello 2019</b>                                | paliperidone LAI-1 | paliperidone OS    | flexible 50-150 mg/4w   | flexible 6-12 mg/day                   | 72  | NR    | 46.4 (NR)    | SCZ (DSM-5)                                                                        | outpatients | Italy                                      | 24  | OL | TSQM, SWN-K, SES endpoint change  | A, B, D, E, G, H, J       |
| <b>Chue 2005</b>                                      | risperidone LAI    | risperidone OS     | fixed 25, 50, 75 mg/2w  | fixed 2, 4, 6 mg/day                   | 640 | 35.3% | 40 (0.6)     | SCZ (DSM-IV)                                                                       | mixed       | UK, mainland Europe, North America, Africa | 12  | DB | PANSS endpoint change             | A, B, C, D, H, J          |
| <b>Crawford 1974</b>                                  | fluphenazine LAI   | trifluoperazine OS | NR                      | NR                                     | 29  | NR    | NR           | SCZ (criteria unclear)                                                             | outpatients | Scotland                                   | 40  | DB | Relapse rate                      | A, B, F                   |
| <b>Del Giudice 1975</b>                               | fluphenazine LAI   | fluphenazine OS    | fixed 25 mg/4w          | flexible 5-80 mg/day; mean 21.7 mg/day | 58  | NR    | NR           | SCZ (criteria unclear)                                                             | outpatients | US                                         | 69  | DB | Re-hospitalization rate           | A, B, C, H, K, L          |
| <b>Detke 2014</b>                                     | olanzapine LAI     | olanzapine OS      | flexible 150-405/4w     | flexible 5-20/day                      | 524 | 32.8% | 40.9 (10.9)  | SCZ (DSM-IV)                                                                       | outpatients | US                                         | 96  | OL | Time to all-cause discontinuation | A, B, C, D, F, H, J, K, L |
| <b>Gaebel 2010</b>                                    | risperidone LAI    | quetiapine OS      | flexible 25-50 mg/2w    | flexible 50-750 mg/day                 | 710 |       | 41.6 (12.8)  | SCZ + SCZ-AFF (DSM-IV)                                                             | outpatients | Multicenter (25 countries)                 | 104 | OL | Time to relapse                   | A, B, C, D, F, H, J, K, L |
| <b>Glick 2005</b>                                     | haloperidol LAI    | quetiapine OS      | flexible mean 170 mg/4w | flexible mean 493 mg/day               | 29  | NR    | 42.2 (12.7)  | SCZ + SCZ-AFF (DSM-IV)                                                             | inpatients  | US                                         | 48  | OL | PANSS endpoint change             | A, B, D                   |
| <b>Green 2015</b>                                     | risperidone LAI    | risperidone OS     | flexible 25-37.5 mg/2w  | flexible 2-4 mg/day                    | 95  | 23.2% | 41.7 (10.7)  | SCZ + ALCOHOL ABUSE (DSM-IV)                                                       | outpatients | US                                         | 24  | OL | Days of heavy drinking            | A, B, D                   |

|                                               |                  |                 |                             |                                               |     |       |             |                                                    |             |                                        |     |    |                                                             |                        |
|-----------------------------------------------|------------------|-----------------|-----------------------------|-----------------------------------------------|-----|-------|-------------|----------------------------------------------------|-------------|----------------------------------------|-----|----|-------------------------------------------------------------|------------------------|
| <b>Hogarty 1979</b>                           | fluphenazine LAI | fluphenazine OS | flexible 12.5-125 mg/2w     | flexible 2.5-40 mg/day                        | 105 | 54%   | 34.2 (NR)   | SCZ (criteria unclear)                             | outpatients | US                                     | 104 | DB | Relapse rate                                                | A, B, C, K             |
| <b>Ishigooka 2015</b>                         | aripiprazole LAI | aripiprazole OS | flexible 300-400 mg/4w      | flexible 6-24 mg/day                          | 455 | 39.1% | 39.2 (11.5) | SCZ (DSM-IV)                                       | NR          | Japan, Malaysia, Taiwan, Philippines   | 52  | DB | Non-relapse rate                                            | A, B, C, D, E, H, J, K |
| <b>Janssen Korea, Ltd. (NCT00992407) 2014</b> | risperidone LAI  | risperidone OS  | flexible 25; 37,5; 50 mg/2w | flexible 0.5-10 mg/day                        | 75  | 39%   | 34.5 (10)   | SCZ + SCZ-AFF (criteria unclear)                   | NR          | Republic of Korea                      | 52  | OL | PSP endpoint change                                         | A, B, C, D, E          |
| <b>Kamijima 2009</b>                          | risperidone LAI  | risperidone OS  | flexible 25-50 mg/2w        | flexible 2-6 mg/day                           | 205 | NR    | 42.7 (NR)   | SCZ (DSM-IV)                                       | mixed       | Japan                                  | 24  | OL | PANSS endpoint change                                       | A, B, C, H, J          |
| <b>Kaneno 1991</b>                            | fluphenazine LAI | haloperidol OS  | flexible 12,6-50 mg/4w      | 3,1-12 mg/day                                 | 263 | 35%   | NR          | SCZ (criteria unclear)                             | NR          | Japan                                  | 24  | DB | Discontinuation rate due to symptoms worsening              | A, B, C                |
| <b>MacFadden 2010</b>                         | risperidone LAI  | aripiprazole OS | flexible 25-50 mg/2w        | flexible 10-30 mg/day                         | 355 | 39.9% | 37.9 (11.5) | SCZ (DSM-IV)                                       | outpatients | Multicenter (US, South America, India) | 104 | OL | Time to relapse; time in remission according to PANSS score | A, B, C, D, J, K       |
| <b>McCreadie 1980</b>                         | fluphenazine LAI | pimozide OS     | flexible 12,5-50 mg/1-2w    | flexible 8-32 mg/day                          | 34  | 0     | 49 (19-70)  | definite SCZ (Feighner criteria)                   | mixed       | Scotland                               | 36  | DB | multiple outcomes                                           | A, B, C, K             |
| <b>McCreadie 1982</b>                         | fluphenazine LAI | pimozide OS     | flexible 12,5-50 mg/1-2w    | fixed, the initial dose was gradually reduced | 28  | 0     | 55.5 (NR)   | definite SCZ (Feighner criteria)                   | outpatients | Scotland                               | 36  | DB | multiple outcomes                                           | A, B, C, K             |
| <b>Mosolov 2008</b>                           | risperidone LAI  | olanzapine OS   | flexible mean 41,7 mg/2w    | flexible mean 15,9 mg/day                     | 40  | 42.5% | 34.5 (8.7)  | SCZ + SCZ-AFF (ICD-10)                             | outpatients | Russia                                 | 53  | OL | PANSS and CGI endpoint change                               | A, B, C, D, K          |
| <b>Quitkin 1978</b>                           | fluphenazine LAI | penfluridol OS  | flexible 0,5-20 mg/2w       | flexible 40-80 mg/day                         | 60  | 31.6% | 26 (6)      | SCZ (Research Diagnostic Criteria)                 | outpatients | US                                     | 52  | DB | multiple outcomes                                           | A, B, C                |
| <b>Schooler 1980</b>                          | fluphenazine LAI | fluphenazine OS | flexible 12,5-100 mg/3w     | flexible 2,5-60 mg/day                        | 214 | 41.4% | 29 (9)      | SCZ (DSM-II)                                       | inpatients  | US                                     | 52  | DB | Relapse rate                                                | A, B, C, F             |
| <b>Subotnik 2015</b>                          | risperidone LAI  | risperidone OS  | flexible 12,5-37,5 mg/2w    | flexible 1-7,5 mg/day                         | 86  | 22%   | 21.5 (3)    | SCZ + SCZ-AFF + schizophreniform disorder (DSM-IV) | mixed       | US                                     | 52  | OL | Relapse rate                                                | A, B, C, F, J, K       |
| <b>Zuardi 1983</b>                            | haloperidol LAI  | haloperidol OS  | unclear                     | unclear                                       | 22  | 40.9% | 45 (NR)     | SCZ (criteria unclear)                             | inpatients  | Brazil                                 | 16  | DB | unclear                                                     | A, D, K                |
| <b>Studies comparing LAIs vs. placebo</b>     |                  |                 |                             |                                               |     |       |             |                                                    |             |                                        |     |    |                                                             |                        |

|                       |                    |         |                                    |    |     |       |              |                                              |             |                                                                                                                        |     |    |                                                              |                              |
|-----------------------|--------------------|---------|------------------------------------|----|-----|-------|--------------|----------------------------------------------|-------------|------------------------------------------------------------------------------------------------------------------------|-----|----|--------------------------------------------------------------|------------------------------|
| <b>Berwaerts 2015</b> | paliperidone LAI-3 | placebo | fixed 175, 263, 350, 525 mg/12w    | NA | 305 | 25%   | 37.8 (11)    | SCZ (DSM-IV-TR)                              | mixed       | Multicenter (8 countries)                                                                                              | 12  | DB | Time to relapse                                              | A, B, C, D, F, G, H, I, J, K |
| <b>Dotti 1979</b>     | fluphenazine LAI   | placebo | flexible 25-50 mg/4w               | NA | 20  | 0     | NR           | SCZ (criteria unclear)                       | outpatients | NR                                                                                                                     | 36  | DB | Relapse rate                                                 | A, B, D                      |
| <b>Eklund 1991</b>    | haloperidol LAI    | Placebo | 60 mg/4w                           | NA | 43  | NR    | NR           | SCZ (Research Diagnostic Criteria)           | mixed       | Sweden                                                                                                                 | 48  | DB | Relapse rate                                                 | A, B, C                      |
| <b>Fu 2015</b>        | paliperidone LAI-1 | placebo | fixed 78, 117, 156, 234 mg/4w      | NA | 334 | 49.4% | 38.6 (19-66) | SCZ-AFF (DSM-IV)                             | mixed       | US                                                                                                                     | 65  | DB | Relapse rate                                                 | A, B, C, D, F, H, J, K       |
| <b>Gitlin 1988</b>    | fluphenazine LAI   | placebo | fixed 12.5 mg/2w                   | NA | 12  | 33.3% | 25 (20-33)   | SCZ + SCZ-AFF (Research Diagnostic Criteria) | NR          | US                                                                                                                     | 12  | DB | Plasma levels of the drug                                    | None                         |
| <b>Gitlin 2001</b>    | fluphenazine LAI   | placebo | flexible, starting from 12.5 mg/2w | NA | 53  | 13%   | 25 (4.3)     | SCZ + SCZ-AFF (Research Diagnostic Criteria) | outpatients | US                                                                                                                     | 12  | DB | Multiple outcomes                                            | None                         |
| <b>Hirsch 1973</b>    | fluphenazine LAI   | placebo | flexible 25 mg-no upper limit/4w   | NA | 81  | 35.9% | 43.4 (10.2)  | SCZ (criteria unclear)                       | outpatients | UK                                                                                                                     | 36  | DB | Relapse rate                                                 | A, B, F, K                   |
| <b>Hough 2010</b>     | paliperidone LAI-1 | placebo | flexible 25-100 mg/4w              | NA | 410 | 66%   | 39.1 (11.1)  | SCZ (DSM-IV)                                 | mixed       | Multicenter (9 countries)                                                                                              | 63  | DB | Time to relapse                                              | A, B, C, D, H, I             |
| <b>Jolley 1990</b>    | fluphenazine LAI   | placebo | flexible mean 133 mg/4w            | NA | 54  | NR    | NR           | SCZ (DSM-III)                                | outpatients | UK                                                                                                                     | 104 | DB | Relapse rate                                                 | A, B, C, F, K                |
| <b>Kane 1979</b>      | fluphenazine LAI   | placebo | flexible 12.5-50/2w                | NA | 16  | NR    | 26.7 (5.3)   | SCZ (Research Diagnostic Criteria)           | outpatients | US                                                                                                                     | 12  | DB | Relapse rate                                                 | A, B, C                      |
| <b>Kane 2003</b>      | risperidone LAI    | placebo | fixed 25, 50, 75 mg/2w             | NA | 400 | 24.6% | 37.7         | SCZ (DSM-IV)                                 | mixed       | US                                                                                                                     | 12  | DB | PANSS endpoint change                                        | A, B, C, D, H, K             |
| <b>Kane 2012</b>      | aripiprazole LAI   | placebo | flexible 300-400 mg/4w             | NA | 403 | 40.2% | 40.6 (10.8)  | SCZ (DSM-IV-TR)                              | mixed       | Multicenter (US, Mexico, Argentina, Bulgaria, Romania, Serbia, Slovakia, Russia, India, Taiwan, Malaysia, Philippines) | 52  | DB | Impending relapse rate according to operationalized criteria | A, B, C, D, H, J, K          |

|                                                                   |                  |                                                    |                                      |                |      |       |             |                                    |             |                            |    |    |                                              |                        |
|-------------------------------------------------------------------|------------------|----------------------------------------------------|--------------------------------------|----------------|------|-------|-------------|------------------------------------|-------------|----------------------------|----|----|----------------------------------------------|------------------------|
| <b>Keskiner 1968</b>                                              | fluphenazine LAI | placebo                                            | fixed 12,5-75 mg/8w                  | NA             | 24   | 83.3% | 36 (22-50)  | SCZ (criteria unclear)             | outpatients | US                         | 12 | DB | CGI endpoint change                          | A, B, C                |
| <b>Odejide 1982</b>                                               | fluphenazine LAI | placebo                                            | fixed 50 mg/4w                       | NA             | 70   | NR    | NR          | SCZ (ICD-9)                        | outpatients | Nigeria                    | 52 | DB | Relapse rate                                 | A, B, C, K             |
| <b>Sampath 1992</b>                                               | fluphenazine LAI | placebo                                            | flexible mean 50,4 mg/4w             | NA             | 24   | NR    | 57.1 (5.4)  | SCZ (Research Diagnostic Criteria) | inpatients  | UK                         | 52 | DB | Discontinuation of antipsychotic maintenance | A, B, C, J             |
| <b>Smeraldi 1990</b>                                              | bromperidol LAI  | placebo                                            | fixed 150 mg/4w                      | NA             | 20   | 50%   | 42 (18-65)  | SCZ, residual (DSM-III-R)          | outpatients | Italy                      | 26 | DB | multiple outcomes                            | A, B, D, H, K          |
| <b>Zissis 1982</b>                                                | haloperidol LAI  | placebo                                            | fixed 100 mg/4w                      | NA             | 32   | 28.1% | 46.5 (NR)   | SCZ (Feighner criteria)            | inpatients  | Greece                     | 16 | DB | BPRS endpoint change                         | A, B, C, D, K, L       |
| <b>Studies comparing LAIs vs. oral antipsychotics vs. placebo</b> |                  |                                                    |                                      |                |      |       |             |                                    |             |                            |    |    |                                              |                        |
| <b>Fleischhacker 2014</b>                                         | aripiprazole LAI | very low dose of aripiprazole LAI (pseudo-placebo) | fixed 400 mg/4w                      | fixed 50 mg/4w | 662  | 38.7% | 41.2 (10.4) | SCZ (DSM-IV)                       | outpatients | Multicenter (15 countries) | 38 | DB | Relapse rate                                 | A, B, C, D, H, I, J, K |
| <b>Kane 2010</b>                                                  | olanzapine LAI   | very low dose of olanzapine LAI (pseudo-placebo)   | fixed 150mg/2w, 405 mg/4w, 300 mg/2w | fixed 45 mg/4w | 1065 | 34.6% | 35 (15.1)   | SCZ (DSM-IV)                       | outpatients | Multicenter (26 countries) | 24 | DB | Relapse rate                                 | A, B, C, D, H, J, K    |
| <b>Rifkin 1977</b>                                                | fluphenazine LAI | placebo                                            | flexible 12,5-50 mg/2w               | NA             | 73   | 31.5% | 23.2 (NR)   | SCZ (criteria unclear)             | outpatients | US                         | 52 | DB | Relapse rate                                 | A, B, C, K, L          |

## Supplement F - Risk of bias of included studies

Risk of bias summary: review authors' judgements about each risk of bias item for each included study

|                   | Random sequence generation (selection bias) | Allocation concealment (selection bias) | Blinding of participants and personnel (performance bias) | Blinding of outcome assessment (detection bias) | Incomplete outcome data (attrition bias) | Selective reporting (reporting bias) | Other bias | Overall (CINEMA) |
|-------------------|---------------------------------------------|-----------------------------------------|-----------------------------------------------------------|-------------------------------------------------|------------------------------------------|--------------------------------------|------------|------------------|
| Albert 1980       | +                                           | ?                                       | +                                                         | ?                                               | +                                        | ?                                    | ?          | ?                |
| Bai 2007          | +                                           | ?                                       | +                                                         | +                                               | +                                        | ?                                    | +          | ?                |
| Barnes 1983       | ?                                           | ?                                       | +                                                         | ?                                               | +                                        | +                                    | +          | +                |
| Bechelli 1985     | +                                           | ?                                       | +                                                         | ?                                               | +                                        | +                                    | +          | +                |
| Berwaerts 2015    | +                                           | +                                       | +                                                         | ?                                               | +                                        | +                                    | +          | +                |
| Bozzatello 2019   | +                                           | +                                       | +                                                         | +                                               | +                                        | ?                                    | +          | +                |
| Chai 1998         | ?                                           | ?                                       | ?                                                         | ?                                               | ?                                        | ?                                    | ?          | ?                |
| Chouinard 1978    | +                                           | ?                                       | +                                                         | ?                                               | +                                        | ?                                    | +          | +                |
| Chouinard 1984    | +                                           | ?                                       | +                                                         | ?                                               | +                                        | +                                    | +          | ?                |
| Chowdhury 1980    | +                                           | ?                                       | +                                                         | ?                                               | ?                                        | +                                    | ?          | ?                |
| Chue 2005         | +                                           | ?                                       | +                                                         | ?                                               | +                                        | +                                    | +          | +                |
| Cookson 1986      | +                                           | ?                                       | +                                                         | ?                                               | +                                        | ?                                    | +          | +                |
| Crawford 1974     | +                                           | ?                                       | +                                                         | ?                                               | +                                        | +                                    | +          | +                |
| Cuomo 2018        | +                                           | ?                                       | +                                                         | ?                                               | +                                        | +                                    | +          | +                |
| Del Giudice 1975  | +                                           | ?                                       | +                                                         | +                                               | +                                        | ?                                    | +          | ?                |
| Dencker 1973      | +                                           | ?                                       | +                                                         | ?                                               | +                                        | +                                    | +          | +                |
| Dencker 1980      | +                                           | ?                                       | +                                                         | +                                               | +                                        | ?                                    | +          | +                |
| Dencker 1994      | +                                           | ?                                       | +                                                         | ?                                               | ?                                        | ?                                    | +          | ?                |
| Detke 2014        | +                                           | ?                                       | +                                                         | ?                                               | +                                        | +                                    | +          | +                |
| Doti 1979         | +                                           | ?                                       | +                                                         | ?                                               | +                                        | +                                    | +          | +                |
| Eberhard 1986     | +                                           | ?                                       | +                                                         | ?                                               | +                                        | +                                    | +          | +                |
| Eklund 1991       | +                                           | ?                                       | +                                                         | +                                               | +                                        | +                                    | +          | +                |
| Eufe 1979         | ?                                           | ?                                       | +                                                         | ?                                               | +                                        | ?                                    | ?          | ?                |
| Feng 1990         | ?                                           | ?                                       | ?                                                         | ?                                               | +                                        | ?                                    | ?          | ?                |
| Fleishhacker 2014 | +                                           | ?                                       | +                                                         | ?                                               | +                                        | ?                                    | +          | ?                |
| Fu 2015           | ?                                           | ?                                       | +                                                         | ?                                               | ?                                        | +                                    | +          | ?                |
| Gaebel 2010       | +                                           | ?                                       | +                                                         | ?                                               | +                                        | +                                    | +          | +                |
| Gitlin 1988       | +                                           | ?                                       | +                                                         | ?                                               | +                                        | +                                    | +          | +                |
| Gitlin 2001       | +                                           | ?                                       | +                                                         | ?                                               | ?                                        | +                                    | +          | ?                |
| Glick 2005        | +                                           | ?                                       | +                                                         | ?                                               | +                                        | +                                    | +          | +                |
| Green 2015        | +                                           | ?                                       | +                                                         | ?                                               | ?                                        | ?                                    | +          | ?                |
| Hirsh 1973        | +                                           | ?                                       | +                                                         | ?                                               | +                                        | ?                                    | +          | +                |
| Hirsh 1978        | +                                           | ?                                       | +                                                         | ?                                               | +                                        | ?                                    | ?          | ?                |
| Hogarty 1979      | +                                           | ?                                       | +                                                         | ?                                               | +                                        | +                                    | +          | ?                |
| Hough 2010        | +                                           | +                                       | +                                                         | ?                                               | +                                        | +                                    | +          | +                |
| Hranov 1998       | +                                           | ?                                       | ?                                                         | ?                                               | ?                                        | ?                                    | ?          | ?                |
| Ishigooka 2015    | +                                           | +                                       | +                                                         | +                                               | +                                        | +                                    | +          | +                |
| Jain 1975         | +                                           | ?                                       | ?                                                         | ?                                               | +                                        | +                                    | +          | ?                |
| Javed 1991        | +                                           | ?                                       | +                                                         | ?                                               | ?                                        | ?                                    | ?          | ?                |
| Jolley 1990       | +                                           | ?                                       | +                                                         | ?                                               | +                                        | +                                    | +          | ?                |
| Kamijima 2009     | ?                                           | ?                                       | +                                                         | ?                                               | ?                                        | +                                    | +          | ?                |
| Kane 1979         | +                                           | ?                                       | +                                                         | ?                                               | +                                        | ?                                    | ?          | ?                |
| Kane 2003         | +                                           | ?                                       | +                                                         | ?                                               | ?                                        | +                                    | +          | ?                |
| Kane 2010         | +                                           | ?                                       | +                                                         | ?                                               | ?                                        | +                                    | +          | ?                |
| Kane 2012         | +                                           | ?                                       | +                                                         | ?                                               | ?                                        | +                                    | +          | ?                |
| Kaneno 1991       | ?                                           | ?                                       | ?                                                         | ?                                               | ?                                        | ?                                    | ?          | ?                |
| Kelly 1977        | +                                           | +                                       | ?                                                         | ?                                               | +                                        | ?                                    | +          | ?                |
| Keskiner 1967     | +                                           | ?                                       | +                                                         | +                                               | +                                        | +                                    | +          | +                |
| Kissling 1985     | +                                           | +                                       | +                                                         | +                                               | +                                        | ?                                    | ?          | +                |
| Koshikawa 2016    | +                                           | +                                       | +                                                         | ?                                               | +                                        | +                                    | +          | +                |
| Lapierre 1983     | +                                           | ?                                       | +                                                         | ?                                               | ?                                        | ?                                    | ?          | ?                |
| Leong 1989        | +                                           | ?                                       | +                                                         | +                                               | +                                        | +                                    | +          | +                |
| Lundin 1992       | +                                           | ?                                       | +                                                         | ?                                               | ?                                        | ?                                    | ?          | ?                |
| Macfadden 2010    | +                                           | ?                                       | +                                                         | +                                               | +                                        | +                                    | +          | +                |
| McCreadie 1980    | +                                           | ?                                       | +                                                         | ?                                               | +                                        | +                                    | +          | ?                |
| McCreadie 1982    | +                                           | ?                                       | +                                                         | ?                                               | +                                        | +                                    | +          | ?                |
| McEvoy 2014       | +                                           | ?                                       | +                                                         | ?                                               | +                                        | +                                    | +          | ?                |
| McKane 1987       | +                                           | ?                                       | +                                                         | ?                                               | ?                                        | ?                                    | ?          | ?                |
| McLaren 1992      | +                                           | ?                                       | +                                                         | ?                                               | ?                                        | ?                                    | ?          | ?                |
| Mosolov 2008      | +                                           | ?                                       | +                                                         | ?                                               | +                                        | +                                    | +          | +                |
| NCT00992407       | +                                           | ?                                       | +                                                         | ?                                               | +                                        | +                                    | +          | +                |
| Odejide 1982      | +                                           | ?                                       | +                                                         | ?                                               | +                                        | +                                    | +          | +                |
| Pinto 1979        | +                                           | ?                                       | +                                                         | ?                                               | ?                                        | ?                                    | ?          | ?                |
| Potkin 2017       | +                                           | +                                       | +                                                         | +                                               | +                                        | +                                    | +          | +                |
| Quitkin 1978      | +                                           | ?                                       | +                                                         | ?                                               | ?                                        | ?                                    | ?          | ?                |
| Rifkin 1977       | +                                           | ?                                       | +                                                         | ?                                               | ?                                        | ?                                    | ?          | ?                |
| Rossi 1990        | +                                           | ?                                       | +                                                         | ?                                               | ?                                        | ?                                    | ?          | ?                |
| Rossi 1992        | +                                           | ?                                       | +                                                         | ?                                               | ?                                        | ?                                    | ?          | ?                |
| Sampath 1992      | +                                           | ?                                       | +                                                         | ?                                               | ?                                        | ?                                    | ?          | ?                |
| Savitz 2016       | +                                           | +                                       | +                                                         | +                                               | +                                        | +                                    | +          | +                |
| Schlosberg 1978   | +                                           | ?                                       | +                                                         | ?                                               | ?                                        | ?                                    | ?          | ?                |
| Schneider 1981    | +                                           | ?                                       | +                                                         | ?                                               | ?                                        | ?                                    | ?          | ?                |
| Schooler 1980     | +                                           | ?                                       | +                                                         | ?                                               | ?                                        | ?                                    | ?          | ?                |
| Sharma 1991       | +                                           | ?                                       | ?                                                         | ?                                               | ?                                        | ?                                    | ?          | ?                |
| Simon 1978        | +                                           | ?                                       | +                                                         | ?                                               | ?                                        | ?                                    | ?          | ?                |
| Singh 1979        | +                                           | ?                                       | +                                                         | ?                                               | ?                                        | ?                                    | ?          | ?                |
| Smeraldi 1990     | +                                           | ?                                       | +                                                         | ?                                               | ?                                        | ?                                    | ?          | ?                |
| Song 1993         | +                                           | ?                                       | +                                                         | ?                                               | ?                                        | ?                                    | ?          | ?                |
| Steinert 1986     | +                                           | ?                                       | +                                                         | ?                                               | ?                                        | ?                                    | ?          | ?                |
| Subotnik 2015     | +                                           | ?                                       | +                                                         | ?                                               | ?                                        | ?                                    | ?          | ?                |
| Walker 1983       | +                                           | ?                                       | +                                                         | ?                                               | ?                                        | ?                                    | ?          | ?                |
| Wistedt 1984      | +                                           | ?                                       | +                                                         | ?                                               | ?                                        | ?                                    | ?          | ?                |
| Wistedt 1991      | +                                           | ?                                       | +                                                         | ?                                               | ?                                        | ?                                    | ?          | ?                |
| Woggon 1977       | +                                           | ?                                       | +                                                         | ?                                               | ?                                        | ?                                    | ?          | ?                |
| Zissis 1982       | +                                           | ?                                       | +                                                         | ?                                               | ?                                        | ?                                    | ?          | ?                |
| Zuardi 1983       | +                                           | +                                       | +                                                         | ?                                               | +                                        | +                                    | +          | +                |



**Risk of bias graph:** review authors' judgements about each risk of bias item presented as percentages across all included studies

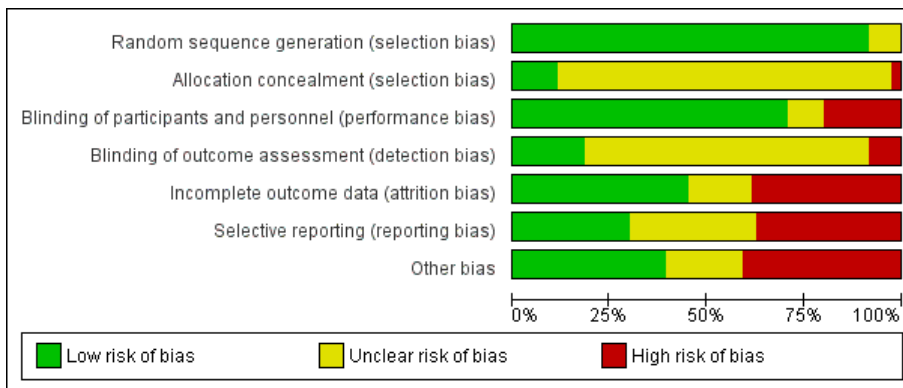

**Risk of bias tables**

Note: the “overall” Risk of Bias, which was used for the analysis of the certainty of results with CINeMA, was calculated according to the following criteria: (a) LOW risk if four or more domains were at low risk (even if three were at high risk); (b) HIGH risk if three or more domains were at high risk; (c) UNCLEAR RISK in all other cases.

*Albert 1980*

| Bias                                                      | Authors' judgement | Support for judgement                                                                                                                                                        |
|-----------------------------------------------------------|--------------------|------------------------------------------------------------------------------------------------------------------------------------------------------------------------------|
| Random sequence generation (selection bias)               | Low risk           | Quote: “Patients were randomly assigned [...]”.                                                                                                                              |
| Allocation concealment (selection bias)                   | Unclear risk       | No details provided regarding allocation concealment                                                                                                                         |
| Blinding of participants and personnel (performance bias) | Low risk           | Quote: “The identity of the medications was masked and the double blind character of the study preserved by inserting an identical placebo injection at two week intervals”. |
| Blinding of outcome assessment (detection bias)           | Unclear risk       | No details provided                                                                                                                                                          |
| Incomplete outcome data (attrition bias)                  | Low risk           | Apparently, although not clearly stated, all patients completed the study and were included in the analyses.                                                                 |
| Selective reporting (reporting bias)                      | Unclear risk       | Protocol not available. Standard deviations and information on Serious Adverse Events have not been reported.                                                                |
| Other bias                                                | Unclear risk       | Source of funding not reported.                                                                                                                                              |
| Overall (CINeMA)                                          | Unclear risk       |                                                                                                                                                                              |

*Bai 2007*

| Bias                                                      | Authors' judgement | Support for judgement                                                                                                                                                                                    |
|-----------------------------------------------------------|--------------------|----------------------------------------------------------------------------------------------------------------------------------------------------------------------------------------------------------|
| Random sequence generation (selection bias)               | Low risk           | Described as randomised, but no details are provided regarding generation of random sequence                                                                                                             |
| Allocation concealment (selection bias)                   | Unclear risk       | No details provided regarding allocation concealment                                                                                                                                                     |
| Blinding of participants and personnel (performance bias) | High risk          | The study is described as single-blind, which probably refers to the blinding of the outcome assessor, as a double-dummy procedure was not employed. However, this is not clearly discussed in the text. |

|                                                 |              |                                                                                                                                                                                                                                                                                                                                                                                                                                                                                                                                              |
|-------------------------------------------------|--------------|----------------------------------------------------------------------------------------------------------------------------------------------------------------------------------------------------------------------------------------------------------------------------------------------------------------------------------------------------------------------------------------------------------------------------------------------------------------------------------------------------------------------------------------------|
| Blinding of outcome assessment (detection bias) | Low risk     | Although authors do not clearly state that assessors were unblinded, the description of the trial as "single blind" suggests so                                                                                                                                                                                                                                                                                                                                                                                                              |
| Incomplete outcome data (attrition bias)        | Low risk     | Overall dropouts were not particularly high, however rates were strongly unbalanced between the two groups: oral risperidone 0/25 (0%), long-acting risperidone 5/25 (20%). Quote: "All data were analyzed on an ITT basis, and endpoint data were generated with the LOCF". Authors applied a "loose" ITT analysis, including only patients who received at least one dose of the drug. Although this is not clearly specified in the text, it seem likely that all patients received at least 1 dose of medication (see p. 1221, Results). |
| Selective reporting (reporting bias)            | Unclear risk | No primary and secondary outcome clearly specified, no protocol available. All relevant outcomes are clearly reported in the text and tables, however tables did not always report the number of patients included in the analysis.                                                                                                                                                                                                                                                                                                          |
| Other bias                                      | High risk    | Study "supported by grants from Janssen-Cilag Taiwan [and] the Johnson & Johnson Corporation, Taipei". The role of the funder in planning and conducting the study and writing the paper is not clearly discussed.                                                                                                                                                                                                                                                                                                                           |
| Overall (CINeMA)                                | Unclear risk |                                                                                                                                                                                                                                                                                                                                                                                                                                                                                                                                              |

*Barnes 1983*

| Bias                                                      | Authors' judgement | Support for judgement                                                                                                                                                                                                                                                              |
|-----------------------------------------------------------|--------------------|------------------------------------------------------------------------------------------------------------------------------------------------------------------------------------------------------------------------------------------------------------------------------------|
| Random sequence generation (selection bias)               | Unclear risk       | Described as a "double-blind, placebo-controlled trial", although the terms "random" is not used, and no details are provided regarding generation of random sequence.                                                                                                             |
| Allocation concealment (selection bias)                   | Unclear risk       | No details provided regarding allocation concealment                                                                                                                                                                                                                               |
| Blinding of participants and personnel (performance bias) | Low risk           | A double-blind and double-dummy method is described.                                                                                                                                                                                                                               |
| Blinding of outcome assessment (detection bias)           | Unclear risk       | No details are provided on whether and how the blinding of the outcome assessor was guaranteed.                                                                                                                                                                                    |
| Incomplete outcome data (attrition bias)                  | Low risk           | Dropout rates were relatively high: pimozide were 5/17 (29%) and fluphenazine LAI 5/19 (26%). An ITT approach is described: "the 1-year follow-up results of all patients who had begun the trial, including drop-outs, withdrawals and relapsers, were involved in the analysis". |
| Selective reporting (reporting bias)                      | Low risk           | The primary outcome is indicated as the Social Behaviour Assessment Schedule (SBAS).                                                                                                                                                                                               |
| Other bias                                                | Low risk           | Funding source is not clearly reported, although apparently there was no involvement of the industry in planning and writing the study.                                                                                                                                            |
| Overall (CINeMA)                                          | Low risk           |                                                                                                                                                                                                                                                                                    |

*Bechelli 1985*

| Bias                                                      | Authors' judgement | Support for judgement                                                                                                                                                                              |
|-----------------------------------------------------------|--------------------|----------------------------------------------------------------------------------------------------------------------------------------------------------------------------------------------------|
| Random sequence generation (selection bias)               | Low risk           | Stratified randomisation employed, but no details provided regarding generation of the random sequence                                                                                             |
| Allocation concealment (selection bias)                   | Unclear risk       | No details provided regarding allocation concealment                                                                                                                                               |
| Blinding of participants and personnel (performance bias) | Low risk           | Study described as "double blind". Quote: "The medications had a similar physical appearance and were injected by a nurse who did not participate in patient evaluation".                          |
| Blinding of outcome assessment (detection bias)           | Unclear risk       | No details provided. Quote: "[...] evaluation carried out every month by the same investigator (LPCB)"                                                                                             |
| Incomplete outcome data (attrition bias)                  | Low risk           | Relatively low drop out rate (<20%) in both arms: HD 2/21 9%, PP 2/20 10%.                                                                                                                         |
| Selective reporting (reporting bias)                      | Low risk           | Although no protocol is available, the outcomes reported are coherent with study objectives                                                                                                        |
| Other bias                                                | High risk          | An author (Iecco MC) is an employee of Janssen Farmaceutica do Brasil, the role of the pharmaceutical company in planning and conducting the study and writing the paper is not clearly discussed. |
| Overall (CINeMA)                                          | Low risk           |                                                                                                                                                                                                    |

*Berwaerts 2015*

| Bias                                                      | Authors' judgement | Support for judgement                                                                                                                                                                                                                                                                                                                                                      |
|-----------------------------------------------------------|--------------------|----------------------------------------------------------------------------------------------------------------------------------------------------------------------------------------------------------------------------------------------------------------------------------------------------------------------------------------------------------------------------|
| Random sequence generation (selection bias)               | Low risk           | Quote:"Stabilized patients were then randomized (1:1 ratio; via a sponsor-prepared computer-generated randomization scheme; administered by an interactive voice/web response system)".<br>Quote:"Randomization was balanced using permuted blocks across the 2 treatment groups and stratified by study center to ensure balance of treatment allocation within a center" |
| Allocation concealment (selection bias)                   | Low risk           | See quoted text on random sequence generation                                                                                                                                                                                                                                                                                                                              |
| Blinding of participants and personnel (performance bias) | Low risk           | Study defined as double blind and details are provided regarding strategies employed to ensure placebo and active intervention injections could not be distinguished on administration                                                                                                                                                                                     |
| Blinding of outcome assessment (detection bias)           | Unclear risk       | No clear details are provided regarding blinding of assessors                                                                                                                                                                                                                                                                                                              |
| Incomplete outcome data (attrition bias)                  | Low risk           | Drop out rates are <20% in both arms: PP3M 12/160 7.5%, PBO 23/145 16%.                                                                                                                                                                                                                                                                                                    |
| Selective reporting (reporting bias)                      | Low risk           | Primary and secondary outcome described in the protocol are reported in the paper                                                                                                                                                                                                                                                                                          |
| Other bias                                                | High risk          | Janssen Research & Development, LLC had a direct involvement in the trial, some authors are company employed. The protocol mentions an ITT approach not reported in the paper                                                                                                                                                                                              |
| Overall (CINeMA)                                          | Low risk           |                                                                                                                                                                                                                                                                                                                                                                            |

#### Bozzatello 2019

| Bias                                                      | Authors' judgement | Support for judgement                                                                                                                                                                                                                                                                                                                                                                                             |
|-----------------------------------------------------------|--------------------|-------------------------------------------------------------------------------------------------------------------------------------------------------------------------------------------------------------------------------------------------------------------------------------------------------------------------------------------------------------------------------------------------------------------|
| Random sequence generation (selection bias)               | Low risk           | Quote:"Research Randomizer [...], free, web-based service for randomization, was used." p.3                                                                                                                                                                                                                                                                                                                       |
| Allocation concealment (selection bias)                   | Low risk           | See above (apparently, a centralized web-based randomization was employed).                                                                                                                                                                                                                                                                                                                                       |
| Blinding of participants and personnel (performance bias) | High risk          | Open label trial                                                                                                                                                                                                                                                                                                                                                                                                  |
| Blinding of outcome assessment (detection bias)           | High risk          | No masking performed according to the trial registration page @ACTRN12618001113246                                                                                                                                                                                                                                                                                                                                |
| Incomplete outcome data (attrition bias)                  | Low risk           | An ITT analysis has been done with LOCF. The ITT sample includes all of the randomised subjects.                                                                                                                                                                                                                                                                                                                  |
| Selective reporting (reporting bias)                      | Unclear risk       | Primary and secondary outcomes are stated in the paper and are all reported. However, a protocol published before the publication is not available. The trial registration has been done Retrospectively in the Australian New Zealand Clinical Trial Registry (the trial being performed by an Italian team in Italy). Given the current standard on clinical trial, an unclear risk judgment seems appropriate. |
| Other bias                                                | Low risk           | No industry role, no other source of bias detected.                                                                                                                                                                                                                                                                                                                                                               |
| Overall (CINeMA)                                          | Low risk           |                                                                                                                                                                                                                                                                                                                                                                                                                   |

#### Chai 1998

| Bias                                                      | Authors' judgement | Support for judgement                                                                                                                                                                                                                                        |
|-----------------------------------------------------------|--------------------|--------------------------------------------------------------------------------------------------------------------------------------------------------------------------------------------------------------------------------------------------------------|
| Random sequence generation (selection bias)               | Unclear risk       | WARNING: PDF COULD NOT BE LOCATED. The Risk of Bias judgments were not reported in Dinesh M, David A, Quraishi SN. Depot pipotiazine palmitate and undecylenate for schizophrenia. Cochrane Database of Systematic Reviews 2004, Issue 3. Art. No.: CD001720 |
| Allocation concealment (selection bias)                   | Unclear risk       | Not reported.                                                                                                                                                                                                                                                |
| Blinding of participants and personnel (performance bias) | Unclear risk       | Not reported.                                                                                                                                                                                                                                                |

|                                                 |              |               |
|-------------------------------------------------|--------------|---------------|
| Blinding of outcome assessment (detection bias) | Unclear risk | Not reported. |
| Incomplete outcome data (attrition bias)        | Unclear risk | Not reported. |
| Selective reporting (reporting bias)            | Unclear risk | Not reported. |
| Other bias                                      | Unclear risk | Not reported. |
| Overall (CINeMA)                                | Unclear risk |               |

*Chouinard 1978*

| Bias                                                      | Authors' judgement | Support for judgement                                                                                                                     |
|-----------------------------------------------------------|--------------------|-------------------------------------------------------------------------------------------------------------------------------------------|
| Random sequence generation (selection bias)               | Low risk           | Subjects were allocated "at random". Quote: "Except for the nurse responsible for giving the injections, the procedure was double-blind". |
| Allocation concealment (selection bias)                   | Unclear risk       | Allocation concealment not addressed in the paper.                                                                                        |
| Blinding of participants and personnel (performance bias) | Low risk           | See above.                                                                                                                                |
| Blinding of outcome assessment (detection bias)           | Unclear risk       | No details provided.                                                                                                                      |
| Incomplete outcome data (attrition bias)                  | Low risk           | Dropout rates: fluphenazine 1/16 (6.2%); pipothiazine 3/16 (18.7%). All randomized patients were included in the analysis.                |
| Selective reporting (reporting bias)                      | Unclear risk       | No protocol available. Primary and secondary outcome are not clearly defined.                                                             |
| Other bias                                                | Low risk           | Poulenc Canada Ltd supplied the drug. Apparently, there was not other involvement of the industry in planning and writing the study.      |
| Overall (CINeMA)                                          | Low risk           |                                                                                                                                           |

*Chouinard 1984*

| Bias                                                      | Authors' judgement | Support for judgement                                                                                                                        |
|-----------------------------------------------------------|--------------------|----------------------------------------------------------------------------------------------------------------------------------------------|
| Random sequence generation (selection bias)               | Low risk           | Quote:"[...] randomly assigned [...] in a balanced 2x2x3 factorial design". No details provided regarding generation of the random sequence. |
| Allocation concealment (selection bias)                   | Unclear risk       | Allocation concealment not addressed in the paper                                                                                            |
| Blinding of participants and personnel (performance bias) | Low risk           | Although the study is reported as "double blind", the authors do not report measures to ensure blinding                                      |
| Blinding of outcome assessment (detection bias)           | Unclear risk       | No details provided                                                                                                                          |
| Incomplete outcome data (attrition bias)                  | Low risk           | No clear definition of primary and secondary outcomes. All of them are however (poorly described)                                            |
| Selective reporting (reporting bias)                      | High risk          | Results are only summarised in the text, basic information lacking e.g. number of patients randomised to each arm                            |
| Other bias                                                | High risk          | Results were only narratively reported. No industry involvement.                                                                             |
| Overall (CINeMA)                                          | Unclear risk       |                                                                                                                                              |

*Chowdhury 1980*

| Bias | Authors' judgement | Support for judgement |
|------|--------------------|-----------------------|
|      |                    |                       |

|                                                           |              |                                                                                                                                                                                          |
|-----------------------------------------------------------|--------------|------------------------------------------------------------------------------------------------------------------------------------------------------------------------------------------|
| Random sequence generation (selection bias)               | Low risk     | Quote:" Patients were assigned to start on one or the other of the active drugs following a random number list".                                                                         |
| Allocation concealment (selection bias)                   | Unclear risk | No details provided.                                                                                                                                                                     |
| Blinding of participants and personnel (performance bias) | Low risk     | Although the study is reported as "double blind", the authors do not report measures to ensure blinding                                                                                  |
| Blinding of outcome assessment (detection bias)           | Unclear risk | No details provided                                                                                                                                                                      |
| Incomplete outcome data (attrition bias)                  | Unclear risk | 26 patients were randomized and 22 patients completed the study (dropout rate 15%). The number of patients randomized to each arm is not reported. Analysis were performed per protocol. |
| Selective reporting (reporting bias)                      | High risk    | See above.                                                                                                                                                                               |
| Other bias                                                | Unclear risk | Lundbeck Ltd. is acknowledged, but the role in planning and writing the study is not discussed.                                                                                          |
| Overall (CINeMA)                                          | Unclear risk |                                                                                                                                                                                          |

#### Chue 2005

| Bias                                                      | Authors' judgement | Support for judgement                                                                                                                                                                                                                                                                                                                                                                                                               |
|-----------------------------------------------------------|--------------------|-------------------------------------------------------------------------------------------------------------------------------------------------------------------------------------------------------------------------------------------------------------------------------------------------------------------------------------------------------------------------------------------------------------------------------------|
| Random sequence generation (selection bias)               | Low risk           | Quote:" Randomization was stratified according to site, Positive and Negative Syndrome Scale (PANSS) score, Extrapyramidal Symptom Rating Scale (ESRS) total score, use of depot antipsychotics in the previous 6 months and daily dose of oral risperidone at randomization". Comment: no details are provided regarding generation of the random sequence, the stratification process seems to imply a computer generated scheme. |
| Allocation concealment (selection bias)                   | Unclear risk       | No details provided regarding allocation concealment                                                                                                                                                                                                                                                                                                                                                                                |
| Blinding of participants and personnel (performance bias) | Low risk           | Double dummy approach, quote:"stable patients were randomly assigned to receive long-acting risperidone (active injections, dummy oral) or continued oral risperidone (dummy injections, active oral)"                                                                                                                                                                                                                              |
| Blinding of outcome assessment (detection bias)           | Unclear risk       | Quote: "Psychotic symptoms were assessed by trained investigators at screening, randomization, and weeks 8 and 12 of the double-blind trial...". Comment: no details are provided regarding blinding of these investigators                                                                                                                                                                                                         |
| Incomplete outcome data (attrition bias)                  | Low risk           | For the primary outcome, trialists included in the analyses patients who recieved at least 4 injections (Loose ITT), however rates of patients non included are relatively low (<20%) in both arms: Oral 46/321= 14%, LAI 53/319= 17% (NB: più accurato di Ostuzzi 2017)                                                                                                                                                            |
| Selective reporting (reporting bias)                      | Low risk           | All outcomes planned on the original trial registration at clinical trials.gov (NCT00249223) are reported in the paper. The paper reports moreover PANSS subscales not stated (nor as primary or secondary) in orginal trial registration.                                                                                                                                                                                          |
| Other bias                                                | High risk          | Jenssen funded trial, 2 authors are Jenssen employees. The role of the funder in planning and conducting the study and writing the paper is not clearly discussed                                                                                                                                                                                                                                                                   |
| Overall (CINeMA)                                          | Low risk           |                                                                                                                                                                                                                                                                                                                                                                                                                                     |

#### Cookson 1986

| Bias                                                      | Authors' judgement | Support for judgement                                                                                                                                                  |
|-----------------------------------------------------------|--------------------|------------------------------------------------------------------------------------------------------------------------------------------------------------------------|
| Random sequence generation (selection bias)               | Low risk           | Quote:"Separate randomisation sequences were used for male and female patients". Comment: no details provided regarding how the randomisation sequences were generated |
| Allocation concealment (selection bias)                   | Unclear risk       | No details provided                                                                                                                                                    |
| Blinding of participants and personnel (performance bias) | Low risk           | Trial reported as double blind, however the strategy employed to ensure blinding is not reported                                                                       |
| Blinding of outcome assessment (detection bias)           | Unclear risk       | No details provided                                                                                                                                                    |

|                                          |              |                                                                                       |
|------------------------------------------|--------------|---------------------------------------------------------------------------------------|
| Incomplete outcome data (attrition bias) | Low risk     | Haloperidol drop out rate: 2/10 20%, no drop out in Fluphenazine arm.                 |
| Selective reporting (reporting bias)     | Unclear risk | Clinical ratings are poorly reported by a summary description, no quantitative result |
| Other bias                               | Low risk     | No industry involvement. No other possible source of bias detected                    |
| Overall (CINeMA)                         | Low risk     |                                                                                       |

#### Crawford 1974

| Bias                                                      | Authors' judgement | Support for judgement                                                                                                |
|-----------------------------------------------------------|--------------------|----------------------------------------------------------------------------------------------------------------------|
| Random sequence generation (selection bias)               | Low risk           | Described as randomised but random sequence generation strategy not reported                                         |
| Allocation concealment (selection bias)                   | Unclear risk       | No details regarding allocation concealment reported                                                                 |
| Blinding of participants and personnel (performance bias) | Low risk           | Double blind with double dummy strategy employed. Quote:"The preparations employed had identical appearances" (p386) |
| Blinding of outcome assessment (detection bias)           | Unclear risk       | No details provided                                                                                                  |
| Incomplete outcome data (attrition bias)                  | Low risk           | 2 patients not analysed in the Trifluoperazine arm: 2/17 11.7%, no drop out from fluphenazine arm (n=14).            |
| Selective reporting (reporting bias)                      | Low risk           | All pre specified outcomes are reported. No protocol available.                                                      |
| Other bias                                                | High risk          | 2 industry employees are mentioned in the acknowledgements, their role is not clearly addressed                      |
| Overall (CINeMA)                                          | Low risk           |                                                                                                                      |

#### Cuomo 2018

| Bias                                                      | Authors' judgement | Support for judgement                                                                                                                                                                                                                                                                                                            |
|-----------------------------------------------------------|--------------------|----------------------------------------------------------------------------------------------------------------------------------------------------------------------------------------------------------------------------------------------------------------------------------------------------------------------------------|
| Random sequence generation (selection bias)               | Low risk           | Quote:"those who accepted [enrollment] were randomly assigned [...] according to a block randomization design".<br>Comment: no details provided regarding the random sequence generation                                                                                                                                         |
| Allocation concealment (selection bias)                   | Unclear risk       | No details provided regarding the allocation concealment                                                                                                                                                                                                                                                                         |
| Blinding of participants and personnel (performance bias) | High risk          | Quote:"The open design of the study, despite randomization, may limit the validity of its data, but this is compensated by its naturalistic design"                                                                                                                                                                              |
| Blinding of outcome assessment (detection bias)           | Unclear risk       | No details provided.                                                                                                                                                                                                                                                                                                             |
| Incomplete outcome data (attrition bias)                  | Low risk           | Quote:"A remarkable finding of our study was the complete adherence of our patients and the absence of dropouts"<br>Comment: all randomized patients were analysed                                                                                                                                                               |
| Selective reporting (reporting bias)                      | Low risk           | Although no protocol is available, the paper is overall coherent and the outcomes chosen are reasonable for the population type. Quote: "We used no other, disorder-specific tools, like the Positive and Negative Syndrome Scale or the Brief Psychiatric Rating Scale (BPRS) due to our population's diagnostic heterogeneity" |
| Other bias                                                | Low risk           | No other source of bias detected. No industry involvement.                                                                                                                                                                                                                                                                       |
| Overall (CINeMA)                                          | Low risk           |                                                                                                                                                                                                                                                                                                                                  |

#### Del Giudice 1975

| Bias                                        | Authors' judgement | Support for judgement                                                                                                                                                                                                          |
|---------------------------------------------|--------------------|--------------------------------------------------------------------------------------------------------------------------------------------------------------------------------------------------------------------------------|
| Random sequence generation (selection bias) | Low risk           | Quote:"Within each block patients were randomly assigned by the visiting nurse to one of three study groups." Comment: Stratified randomisation employed, but no details are provided regarding the random sequence generation |
| Allocation concealment (selection bias)     | Unclear risk       | No details are provided regarding the allocation concealment                                                                                                                                                                   |

|                                                           |              |                                                                                                                                                                                                                                                                                                                                                                                                                                                                                                                                                                                                                                                                                                                                           |
|-----------------------------------------------------------|--------------|-------------------------------------------------------------------------------------------------------------------------------------------------------------------------------------------------------------------------------------------------------------------------------------------------------------------------------------------------------------------------------------------------------------------------------------------------------------------------------------------------------------------------------------------------------------------------------------------------------------------------------------------------------------------------------------------------------------------------------------------|
| Blinding of participants and personnel (performance bias) | Low risk     | Patients were randomized to three groups. A double-dummy procedure was used in two groups (fluphenazine depot + oral PBO; oral fluphenazine + PBO injection), while the third group was open-label (oral fluphenazine). Only the nurse who administered the intervention had the code, in case of adverse reactions needed to be managed, which is consistent with a single-blind design, as stated by the authors.                                                                                                                                                                                                                                                                                                                       |
| Blinding of outcome assessment (detection bias)           | Low risk     | Quote:"The investigators and ward physicians were blind" p 32. Comment: probably done                                                                                                                                                                                                                                                                                                                                                                                                                                                                                                                                                                                                                                                     |
| Incomplete outcome data (attrition bias)                  | High risk    | Quote:"The life table analyses were adjusted for the partial and censored data through a calculation of the "effective number present at the beginning of an interval". As a result, the probabilities of returning are based on all of the available data."<br>Comment: results are provided in not enough detail to ensure the validity of this approach as an ITT. Number of drop out patients of group 3 seems to be wrong (quote:"In Group III of 8 patients, 2 refused to participate, 1 refused injection and 1 refused the nurse's visits. The other 6 left the area after starting injection." 2+1+1+6=10). Over all, dropout rates were high: LAI + oral PBO 8/27 (29.6%); oral + LAI PBO 11/31 (35.5%), oral alone 6/30 (20%). |
| Selective reporting (reporting bias)                      | Unclear risk | The primary outcome was pre-specified and reported in the text and tables. No other efficacy outcomes were reported. Adverse events were not reported for group II. No protocol available                                                                                                                                                                                                                                                                                                                                                                                                                                                                                                                                                 |
| Other bias                                                | High risk    | The trial was funded by the Veteran administration and Squibb International. A Squibb and Sons statistician employee was involved in the trial design. The role of the funder in conducting the study and writing the paper is not clearly discussed.                                                                                                                                                                                                                                                                                                                                                                                                                                                                                     |
| Overall (CINeMA)                                          | Unclear risk |                                                                                                                                                                                                                                                                                                                                                                                                                                                                                                                                                                                                                                                                                                                                           |

#### Dencker 1973

| Bias                                                      | Authors' judgement | Support for judgement                                                                                                                                                                      |
|-----------------------------------------------------------|--------------------|--------------------------------------------------------------------------------------------------------------------------------------------------------------------------------------------|
| Random sequence generation (selection bias)               | Low risk           | Quote:" These 67 patients were matched for sex and age (10 year classes), and distributed randomly between the treatment series".                                                          |
| Allocation concealment (selection bias)                   | Unclear risk       | No details are provided regarding allocation concealment                                                                                                                                   |
| Blinding of participants and personnel (performance bias) | Low risk           | Quote: "The double blind technique was applied and one of the psychiatrists regulated the treatment by prescribing the neuroleptics in the form of dose units".                            |
| Blinding of outcome assessment (detection bias)           | Unclear risk       | No details provided on the blinding of the outcome assessment.                                                                                                                             |
| Incomplete outcome data (attrition bias)                  | Low risk           | Dropout rates: fluphenazine LAI 6/35 (17.1%); pipothiazine LAI 3/32 (9.4%). A per protocol analysis was employed, however the number of patients analysed was similar to those randomized. |
| Selective reporting (reporting bias)                      | Unclear risk       | No protocol available. No clear distinction between primary and secondary outcomes. All outcomes are reported, although many details are missing (e.g. standard deviations).               |
| Other bias                                                | Low risk           | Possible role of the industry in funding, planning and writing the study is not reported. Apparently, the study was conducted independently from industry.                                 |
| Overall (CINeMA)                                          | Low risk           |                                                                                                                                                                                            |

#### Dencker 1980

| Bias                                                      | Authors' judgement | Support for judgement                                                                                                                                                                                                                                                                                                                                                                                                                                                                                                |
|-----------------------------------------------------------|--------------------|----------------------------------------------------------------------------------------------------------------------------------------------------------------------------------------------------------------------------------------------------------------------------------------------------------------------------------------------------------------------------------------------------------------------------------------------------------------------------------------------------------------------|
| Random sequence generation (selection bias)               | Low risk           | Quote: "60 patients started the 12-month study during the years 1974-75. These patients were allocated at random to treatment with clopenthixol decanoate (30) or flupenthixol palmitate (30)" and "The injections were given by one of two nurses who knew the code but were unaware of other details of the study and who were not participating in the ratings or other assessments. This method of drug administration has been found in other trials to function well for maintaining double-blind conditions". |
| Allocation concealment (selection bias)                   | Unclear risk       | No details are provided regarding allocation concealment                                                                                                                                                                                                                                                                                                                                                                                                                                                             |
| Blinding of participants and personnel (performance bias) | Low risk           | See above.                                                                                                                                                                                                                                                                                                                                                                                                                                                                                                           |
| Blinding of outcome assessment (detection bias)           | Low risk           | See above.                                                                                                                                                                                                                                                                                                                                                                                                                                                                                                           |

|                                          |              |                                                                                                                                                                              |
|------------------------------------------|--------------|------------------------------------------------------------------------------------------------------------------------------------------------------------------------------|
| Incomplete outcome data (attrition bias) | High risk    | Dropout rates: flupenthixol LAI 7/30 (23.3%); clopenthixol LAI 3/30 (10%). A per protocol analysis was employed.                                                             |
| Selective reporting (reporting bias)     | Unclear risk | No protocol available. No clear distinction between primary and secondary outcomes. All outcomes are reported, although many details are missing (e.g. standard deviations). |
| Other bias                               | Low risk     | Possible role of the industry in funding, planning and writing the study is not reported. Apparently, the study was conducted independently from industry.                   |
| Overall (CINeMA)                         | Low risk     |                                                                                                                                                                              |

Dencker 1994

| Bias                                                      | Authors' judgement | Support for judgement                                                                                                                                                                    |
|-----------------------------------------------------------|--------------------|------------------------------------------------------------------------------------------------------------------------------------------------------------------------------------------|
| Random sequence generation (selection bias)               | Low risk           | Quote: "The trial was carried out as a randomised, double-blind, cross-over, multicentre study (five centres) with a total treatment period of 51 weeks".                                |
| Allocation concealment (selection bias)                   | Unclear risk       | No details are provided regarding allocation concealment                                                                                                                                 |
| Blinding of participants and personnel (performance bias) | Low risk           | Quote: "The double blind technique was applied and one of the psychiatrists regulated the treatment by prescribing the neuroleptics in the form of dose units".                          |
| Blinding of outcome assessment (detection bias)           | Unclear risk       | No details provided.                                                                                                                                                                     |
| Incomplete outcome data (attrition bias)                  | Unclear risk       | Overall dropout rate was 5/29 (17.2%), however the number of patients randomized for each arm is not provided. Apparently, analyses were performed according to a per protocol approach. |
| Selective reporting (reporting bias)                      | Unclear risk       | No protocol available. No clear distinction between primary and secondary outcomes. All outcomes are reported, although many details are missing (e.g. standard deviations).             |
| Other bias                                                | Low risk           | Possible role of the industry in funding, planning and writing the study is not reported. Apparently, the study was conducted independently from industry.                               |
| Overall (CINeMA)                                          | Unclear risk       |                                                                                                                                                                                          |

Detke 2014

| Bias                                                      | Authors' judgement | Support for judgement                                                                                                                                                                                                                                                                                                                        |
|-----------------------------------------------------------|--------------------|----------------------------------------------------------------------------------------------------------------------------------------------------------------------------------------------------------------------------------------------------------------------------------------------------------------------------------------------|
| Random sequence generation (selection bias)               | Low risk           | Quote: "At randomization (week 0) patients were randomly assigned to and received either olanzapine LAI [...] or oral olanzapine". (p. 427). Comment: no details are provided regarding the generation of the random sequence                                                                                                                |
| Allocation concealment (selection bias)                   | Unclear risk       | No details are provided regarding allocation concealment                                                                                                                                                                                                                                                                                     |
| Blinding of participants and personnel (performance bias) | High risk          | Quote: "This was a global, multicenter, 2-year, randomized, open label study comparing the long-term treatment effectiveness and safety of monthly olanzapine LAI versus daily oral olanzapine" p 427                                                                                                                                        |
| Blinding of outcome assessment (detection bias)           | Unclear risk       | No details provided on the blinding of the outcome assessment                                                                                                                                                                                                                                                                                |
| Incomplete outcome data (attrition bias)                  | High risk          | Dropout rates were very high: LAI group 142/264 (53.8%), oral group 133/260 (51.2%). Quote: "All analyses were conducted on an intention-to-treat basis; efficacy analyses included all randomized patients with baseline and post-baseline observations, unless otherwise stated". Missing data were imputed with LOCF and MMRM approaches. |
| Selective reporting (reporting bias)                      | Low risk           | All outcomes stated in the first registration at clinicaltrials.gov (May 2006) are reported in the paper DA RICONTROLLARE: credo che ce ne siano moltissimi su ct.gov - li hannop tenuti da parte just in case?                                                                                                                              |
| Other bias                                                | High risk          | Eli Lilly sponsored trial. 4 authors are Eli Lilly employees. The role of the funder in planning and conducting the study and writing the paper is not clearly discussed. Quote: "Patients who discontinued because of sponsor decision (n = 6/524, 1.1%) were excluded from discontinuation analyses to minimize potential bias".           |
| Overall (CINeMA)                                          | High risk          |                                                                                                                                                                                                                                                                                                                                              |

Dotti 1979

| Bias | Authors' judgement | Support for judgement |
|------|--------------------|-----------------------|
|------|--------------------|-----------------------|



|                                                           |              |                                                                                                                                                                                                                                                                          |
|-----------------------------------------------------------|--------------|--------------------------------------------------------------------------------------------------------------------------------------------------------------------------------------------------------------------------------------------------------------------------|
| Random sequence generation (selection bias)               | Low risk     | The paper states that allocation was randomized but does not report randomization strategy.                                                                                                                                                                              |
| Allocation concealment (selection bias)                   | Unclear risk | No details provided regarding allocation concealment.                                                                                                                                                                                                                    |
| Blinding of participants and personnel (performance bias) | Low risk     | No details provided regarding the appearance of the placebo injections. Investigators are reported as unaware of patients' assignment.                                                                                                                                   |
| Blinding of outcome assessment (detection bias)           | Unclear risk | No details provided                                                                                                                                                                                                                                                      |
| Incomplete outcome data (attrition bias)                  | High risk    | No ITT approach reported. All randomized subjects are accounted for the drop-out outcome. Regarding the BPRS score: in the placebo group 3 out of 10 patients (30%) and 1 out of 10 in the Fluphenazine arm (10%) were not analyzed, moreover this being due to relapse. |
| Selective reporting (reporting bias)                      | Low risk     | No protocol available. No clearly prespecified primary and secondary outcomes, however all of the measures reported in the "methods" section are reported within the paper.                                                                                              |
| Other bias                                                | Low risk     | No industry involvement. No other source of bias detected                                                                                                                                                                                                                |
| Overall (CINeMA)                                          | Low risk     |                                                                                                                                                                                                                                                                          |

*Eberhard 1986*

| Bias                                                      | Authors' judgement | Support for judgement                                                                                                                                                                                                                                                                                                                                                                                                                                                                                                                                                                                                                                                                                                                                                                                                              |
|-----------------------------------------------------------|--------------------|------------------------------------------------------------------------------------------------------------------------------------------------------------------------------------------------------------------------------------------------------------------------------------------------------------------------------------------------------------------------------------------------------------------------------------------------------------------------------------------------------------------------------------------------------------------------------------------------------------------------------------------------------------------------------------------------------------------------------------------------------------------------------------------------------------------------------------|
| Random sequence generation (selection bias)               | Low risk           | Quote: "The patients were randomised in groups of six" p. 256. No details provided regarding random sequence generation.                                                                                                                                                                                                                                                                                                                                                                                                                                                                                                                                                                                                                                                                                                           |
| Allocation concealment (selection bias)                   | Unclear risk       | No details provided regarding allocation concealment                                                                                                                                                                                                                                                                                                                                                                                                                                                                                                                                                                                                                                                                                                                                                                               |
| Blinding of participants and personnel (performance bias) | Low risk           | The trial is described as "double blind", although the blinding is not described in detail, two similar looking interventions were compared. Probably effective.                                                                                                                                                                                                                                                                                                                                                                                                                                                                                                                                                                                                                                                                   |
| Blinding of outcome assessment (detection bias)           | Unclear risk       | Quote: "At weeks, 0, 12, 16 and 24 of both the HALd and the FLUD treatment phases, the psychiatrist completed the comprehensive psychopathological rating scale (CPRS) [...] At weeks 0, 14, 18, (i.e. 2 weeks after injections) and 24 of each study phase, the patient stated whether the condition had improved or deteriorated as compared to the preceding control assessment. In particular a check list was completed of side effects expected to occur" p. 258. Although the study is stated to be "double blind", strategy for ensure blinding of assessor is not described. It's also unclear whether the assessor psychiatrists were the same prescribing drugs increase (flexible dose trial) and the fact that 10 subjects were inpatients should also be taken into account. Overall the risk of bias seems unclear. |
| Incomplete outcome data (attrition bias)                  | Low risk           | Quote: "All patients completed the first period, thereafter six dropped out" p. 256. Since only the first phase of this crossover study is taken into account, the attrition rate for both arms is 0%                                                                                                                                                                                                                                                                                                                                                                                                                                                                                                                                                                                                                              |
| Selective reporting (reporting bias)                      | Low risk           | A protocol for his trial is not available. Although the paper does not clearly state a primary outcome, a major importance of the CRSP scale is implied and all outcomes reported (weight change is described but not quantitatively reported).                                                                                                                                                                                                                                                                                                                                                                                                                                                                                                                                                                                    |
| Other bias                                                | High risk          | Janssen sponsored trial. One of the two authors was a Janssen employee, moreover in the Acknowledgements some more Janssen employees are recognized (quote) "for their active collaboration in this study" p.261. The role of the funder in planning and conducting the study and writing the paper is not clearly discussed.                                                                                                                                                                                                                                                                                                                                                                                                                                                                                                      |
| Overall (CINeMA)                                          | Low risk           |                                                                                                                                                                                                                                                                                                                                                                                                                                                                                                                                                                                                                                                                                                                                                                                                                                    |

*Eklund 1991*

| Bias                                        | Authors' judgement | Support for judgement                                                                                                                                                                                                   |
|---------------------------------------------|--------------------|-------------------------------------------------------------------------------------------------------------------------------------------------------------------------------------------------------------------------|
| Random sequence generation (selection bias) | Low risk           | Quote: "After 15 countdown weeks, the patients either continued HD treatment or received placebo injection in accordance with randomization performed at baseline." No details on the sequence generation are provided. |
| Allocation concealment (selection bias)     | Unclear risk       | No details provided regarding allocation concealment.                                                                                                                                                                   |
| Blinding of participants and                | Low risk           | Trial design generically stated to be "double blind", but without enough detail to establish the active/PBO injection could not be distinguished.                                                                       |

|                                                 |           |                                                                                                                                                                                                                                                                                                                                                                                                                                                                                                                                                                                                                                                                                                                                                                                                                                                                  |
|-------------------------------------------------|-----------|------------------------------------------------------------------------------------------------------------------------------------------------------------------------------------------------------------------------------------------------------------------------------------------------------------------------------------------------------------------------------------------------------------------------------------------------------------------------------------------------------------------------------------------------------------------------------------------------------------------------------------------------------------------------------------------------------------------------------------------------------------------------------------------------------------------------------------------------------------------|
| personnel (performance bias)                    |           |                                                                                                                                                                                                                                                                                                                                                                                                                                                                                                                                                                                                                                                                                                                                                                                                                                                                  |
| Blinding of outcome assessment (detection bias) | High risk | No details are given regarding who performed the outcome assessment and whether blinded to allocation, however part of the discussion seems to imply that who made the assessment had knowledge of allocation and was informed of the overall clinical course of patients (see "other bias")                                                                                                                                                                                                                                                                                                                                                                                                                                                                                                                                                                     |
| Incomplete outcome data (attrition bias)        | Low risk  | Although original investigators defined as "dropped out" patients who relapsed, the drop out rate measured as leaving the assigned arm early due to any reason (but relapse) are <20% (run in: 5/56 9%, HD 3/20 15%, PBO 0/23 0%)                                                                                                                                                                                                                                                                                                                                                                                                                                                                                                                                                                                                                                |
| Selective reporting (reporting bias)            | High risk | No clear definition of primary and secondary outcomes. No definition of "relapse" provided. Data are poorly reported.                                                                                                                                                                                                                                                                                                                                                                                                                                                                                                                                                                                                                                                                                                                                            |
| Other bias                                      | High risk | Original investigators report concern that some patients may have deviated from study drug. Quote: "Judged from high prolactin and RRA values in serum, a few patients may have occasionally used additional antipsychotic drugs, probably as a result of this emotional pressure (positive noncompliance)". Original investigators report concern on the efficacy of the instrument used to assess relapse in some cases. Quote: "Because two of the seven patients who remained well in the placebo group were skilled dissimulants, their psychiatric condition was difficult to assess. Reports from nurses as well as neighbours suggested that these two patients behaved strangely at times. The fact that they subsequently denied psychiatric symptoms during CPRS determinations demonstrate the difficulty of drawing the line between ill and well." |
| Overall (CINeMA)                                | High risk |                                                                                                                                                                                                                                                                                                                                                                                                                                                                                                                                                                                                                                                                                                                                                                                                                                                                  |

*Eufe 1979*

| Bias                                                      | Authors' judgement | Support for judgement                                                                                                                              |
|-----------------------------------------------------------|--------------------|----------------------------------------------------------------------------------------------------------------------------------------------------|
| Random sequence generation (selection bias)               | Unclear risk       | Quote: "According to chance".                                                                                                                      |
| Allocation concealment (selection bias)                   | Unclear risk       | No details provided.                                                                                                                               |
| Blinding of participants and personnel (performance bias) | Low risk           | Described as double-blind.                                                                                                                         |
| Blinding of outcome assessment (detection bias)           | Unclear risk       | No details provided.                                                                                                                               |
| Incomplete outcome data (attrition bias)                  | Low risk           | Dropout rate: perphenazine LAI 1/16 (6.2%); flupenthixol LAI 2/16 (12.5%). Apparently, intention-to-treat analysis was done using a LOCF approach. |
| Selective reporting (reporting bias)                      | Unclear risk       | Protocol not available. Some outcomes of interest regarding Mental State, side effects and nurses' assessments were reported incompletely.         |
| Other bias                                                | Unclear risk       | No details provided on a possible role of the funder.                                                                                              |
| Overall (CINeMA)                                          | Unclear risk       |                                                                                                                                                    |

*Feng 1990*

| Bias                                                      | Authors' judgement | Support for judgement                                                                                                                        |
|-----------------------------------------------------------|--------------------|----------------------------------------------------------------------------------------------------------------------------------------------|
| Random sequence generation (selection bias)               | Unclear risk       | Quote: "randomly assigned".                                                                                                                  |
| Allocation concealment (selection bias)                   | Unclear risk       | No details provided.                                                                                                                         |
| Blinding of participants and personnel (performance bias) | Unclear risk       | "double blind...patients and doctors did not know what kind of medicine to be applied till end of treatment". Blinding details not reported. |
| Blinding of outcome assessment (detection bias)           | Unclear risk       | See above.                                                                                                                                   |

|                                          |              |                                                                                                                       |
|------------------------------------------|--------------|-----------------------------------------------------------------------------------------------------------------------|
| Incomplete outcome data (attrition bias) | High risk    | Losses to follow-up unbalanced between groups: 3 (20%) in the haloperidol group and 1 (7%) in the fluphenazine group. |
| Selective reporting (reporting bias)     | Low risk     | Protocol not available. Primary outcome clearly reported.                                                             |
| Other bias                               | Unclear risk | Source of funding not reported.                                                                                       |
| Overall (CINeMA)                         | Unclear risk |                                                                                                                       |

*Fleishhacker 2014*

| Bias                                                      | Authors' judgement | Support for judgement                                                                                                                                                                                                                                                                                                                                                                                                                                                                                                                                                                                                                                                                                                                                                                                                     |
|-----------------------------------------------------------|--------------------|---------------------------------------------------------------------------------------------------------------------------------------------------------------------------------------------------------------------------------------------------------------------------------------------------------------------------------------------------------------------------------------------------------------------------------------------------------------------------------------------------------------------------------------------------------------------------------------------------------------------------------------------------------------------------------------------------------------------------------------------------------------------------------------------------------------------------|
| Random sequence generation (selection bias)               | Low risk           | Quote:"eligible patients were randomised 2:2:1 to aripiprazole once-monthly 400 mg, oral aripiprazole (10–30 mg/day) or aripiprazole once-monthly 50 mg." p 136. Comment: generation of random sequence not described                                                                                                                                                                                                                                                                                                                                                                                                                                                                                                                                                                                                     |
| Allocation concealment (selection bias)                   | Unclear risk       | See quote above. No details provided regarding allocation concealment                                                                                                                                                                                                                                                                                                                                                                                                                                                                                                                                                                                                                                                                                                                                                     |
| Blinding of participants and personnel (performance bias) | Low risk           | Quote:"Aripiprazole once-monthly was administered into the gluteal muscle using a double-dummy design such that all patients, including those randomised to oral aripiprazole, received an injection. For patients randomised to aripiprazole once-monthly 400 mg or 50 mg, a one-time option to decrease to 300 mg or 25 mg, respectively, was permitted" p. 136<br>Quote:"Aripiprazole depot was supplied in 400 mg lyophilized vials [...] Placebo tablets were identical in appearance to the aripiprazole tablets [...] Placebo depot was supplied in lyophilized vials [...] Aripiprazole depot was supplied in 200 mg lyophilized vials. (clinicaltrials.gov for NCT00706654)<br>Comment: although some details are not reported, the double dummy procedure was likely effective in ensuring double blind fashion |
| Blinding of outcome assessment (detection bias)           | Unclear risk       | No details provided regarding blinding of assessor                                                                                                                                                                                                                                                                                                                                                                                                                                                                                                                                                                                                                                                                                                                                                                        |
| Incomplete outcome data (attrition bias)                  | Low risk           | Quote:"The intent-to-treat (ITT) sample included all patients randomised to the double-blind treatment. The efficacy sample included all patients who received at least one dose of treatment and had at least one efficacy outcome assessment in the double-blind, active-controlled phase." "The Kaplan–Meier estimated impending relapse rates at week 26 were calculated as 1 minus the proportions of patients free of impending relapse events" p 137 (other outcomes measures employed LOCF as imputational approach)<br>Comment: although "loose", an ITT approach is employed and the vast majority of patients were eventually included in the analysis of data.                                                                                                                                                |
| Selective reporting (reporting bias)                      | Unclear risk       | Quote:"Also, because of the very low initial relapse rates, the primary outcome was adjusted (as approved by the EMA; see online supplement DS1) from time to observed impending relapse at week 38 to Kaplan–Meier estimated relapse rates at week 26" p.144<br>Comment: primary outcome was changed during course of the study. Otherwise, no pre planned outcome is omitted.                                                                                                                                                                                                                                                                                                                                                                                                                                           |
| Other bias                                                | High risk          | Study funded and sponsored by Otsuka Pharmaceutical Development & Commercialization, Inc, several authors are employed by Otsuka and Lundbeck. The funder played an active role in the analysis and interpretation of data.                                                                                                                                                                                                                                                                                                                                                                                                                                                                                                                                                                                               |
| Overall (CINeMA)                                          | Unclear risk       |                                                                                                                                                                                                                                                                                                                                                                                                                                                                                                                                                                                                                                                                                                                                                                                                                           |

*Fu 2015*

| Bias                                                      | Authors' judgement | Support for judgement                                                                                                                                                                                            |
|-----------------------------------------------------------|--------------------|------------------------------------------------------------------------------------------------------------------------------------------------------------------------------------------------------------------|
| Random sequence generation (selection bias)               | Unclear risk       | A double-blind approach with a "matching placebo" was employed. No details on the generation of the randomization sequence.                                                                                      |
| Allocation concealment (selection bias)                   | Unclear risk       | No details provided.                                                                                                                                                                                             |
| Blinding of participants and personnel (performance bias) | Low risk           | A double-blind approach with a "matching placebo" was employed.                                                                                                                                                  |
| Blinding of outcome assessment (detection bias)           | Unclear risk       | It is unclear whether the outcome assessor was blinded.                                                                                                                                                          |
| Incomplete outcome data (attrition bias)                  | Unclear risk       | Dropout rates: paliperidone LAI 24%; placebo 28%. The primary analysis was performed on the ITT analysis set (all patients who received at least one injection).                                                 |
| Selective reporting (reporting bias)                      | High risk          | According to the protocol, the primary outcome was the percentage of patients experiencing relapse, while in the paper multiple primary outcomes are described (i.e. delaying relapse, safety and tolerability). |

|                  |              |                                                                                       |
|------------------|--------------|---------------------------------------------------------------------------------------|
| Other bias       | High risk    | The study was sponsored, designed and written by the Janssen Scientific Affairs, LLC. |
| Overall (CINeMA) | Unclear risk |                                                                                       |

Gaebel 2010

| Bias                                                      | Authors' judgement | Support for judgement                                                                                                                                                                                                                                                                                                                                                                           |
|-----------------------------------------------------------|--------------------|-------------------------------------------------------------------------------------------------------------------------------------------------------------------------------------------------------------------------------------------------------------------------------------------------------------------------------------------------------------------------------------------------|
| Random sequence generation (selection bias)               | Low risk           | Quote: "Stratified randomization according to previous treatment used three strata [...]. Patients were randomly allocated 1 : 1 to RLAI or quetiapine" p.2369                                                                                                                                                                                                                                  |
| Allocation concealment (selection bias)                   | Unclear risk       | No details provided regarding allocation concealment                                                                                                                                                                                                                                                                                                                                            |
| Blinding of participants and personnel (performance bias) | High risk          | Study defined as open label                                                                                                                                                                                                                                                                                                                                                                     |
| Blinding of outcome assessment (detection bias)           | Unclear risk       | No details provided regarding masking of outcome assessor in the context of an open label trial.                                                                                                                                                                                                                                                                                                |
| Incomplete outcome data (attrition bias)                  | Low risk           | For the primary outcome (time to relapse), an ITT approach was employed (Kaplan-Meier product limit method), and in both arms most of the randomised subjects were included (RLAI: 327/355: 92% QUET: 326/355 92%). For secondary outcomes the ITT approach employed the LOCF method. All the secondary outcomes had an attrition rate < 20, the highest being the SF-12 (RLAI 17%, QUET: 18%). |
| Selective reporting (reporting bias)                      | High risk          | The primary outcome is clearly stated and reported both in paper and in the trial registration at clinicaltrials.gov. The SF-12 quality of life score secondary outcome is reported in the trial registration entry but omitted from the published paper. All the other outcomes are coherent between trial registration and published paper.                                                   |
| Other bias                                                | High risk          | Industry sponsored Trial. Jansenn Cilag employes 2 of the authors (A. Schreiner, P Bergemans), other company employees provided study design, medical conduct supervision, statistical analyses.                                                                                                                                                                                                |
| Overall (CINeMA)                                          | High risk          |                                                                                                                                                                                                                                                                                                                                                                                                 |

Gitlin 1988

| Bias                                                      | Authors' judgement | Support for judgement                                                                                                                                         |
|-----------------------------------------------------------|--------------------|---------------------------------------------------------------------------------------------------------------------------------------------------------------|
| Random sequence generation (selection bias)               | Low risk           | Quote: "Each patient was treated with either continued fluphenazine decanoate or placebo administered double blind for 12 weeks with random assignment [...]" |
| Allocation concealment (selection bias)                   | Unclear risk       | No details provided regarding allocation concealment                                                                                                          |
| Blinding of participants and personnel (performance bias) | Low risk           | See above.                                                                                                                                                    |
| Blinding of outcome assessment (detection bias)           | Unclear risk       | No details provided.                                                                                                                                          |
| Incomplete outcome data (attrition bias)                  | Low risk           | Apparently, no dropouts occurred. A per protocol analysis was performed.                                                                                      |
| Selective reporting (reporting bias)                      | High risk          | No protocol available. Implicitly, the primary outcome is represented by variations of plasma levels of fluphenazine. No other outcomes are reported.         |
| Other bias                                                | Low risk           | Apparently, the sponsor participated only by providing the drug for the study.                                                                                |
| Overall (CINeMA)                                          | Low risk           |                                                                                                                                                               |

Gitlin 2001

| Bias                                                      | Authors' judgement | Support for judgement                                                                                                                                                                                                                                              |
|-----------------------------------------------------------|--------------------|--------------------------------------------------------------------------------------------------------------------------------------------------------------------------------------------------------------------------------------------------------------------|
| Random sequence generation (selection bias)               | Low risk           | Quote: "During the first 24 weeks of the study, patients were randomly assigned to treatment in a double-blind fashion to 12 weeks of their usual fluphenazine decanoate regimen or 12 weeks of placebo treatment, administered by a research nurse or physician". |
| Allocation concealment (selection bias)                   | Unclear risk       | No details provided regarding allocation concealment                                                                                                                                                                                                               |
| Blinding of participants and personnel (performance bias) | Low risk           | See above.                                                                                                                                                                                                                                                         |

|                                                 |              |                                                                                                                                                                                                        |
|-------------------------------------------------|--------------|--------------------------------------------------------------------------------------------------------------------------------------------------------------------------------------------------------|
| Blinding of outcome assessment (detection bias) | Unclear risk | No details provided.                                                                                                                                                                                   |
| Incomplete outcome data (attrition bias)        | Unclear risk | The number of patients analysed varies across different analyses. The number of dropout is apparently low, however the reasons for dropout and their distribution across study arms are not described. |
| Selective reporting (reporting bias)            | High risk    | No protocol available. Primary and secondary outcomes are not clearly described. The distribution of events across study arms is not clearly reported, thus data are not usable for the meta-analysis. |
| Other bias                                      | Low risk     | Apparently, the sponsor participated only by providing the drug for the study.                                                                                                                         |
| Overall (CINeMA)                                | Unclear risk |                                                                                                                                                                                                        |

*Glick 2005*

| Bias                                                      | Authors' judgement | Support for judgement                                                                                                                                                                                                                                                                                                                                                                                                                                                                           |
|-----------------------------------------------------------|--------------------|-------------------------------------------------------------------------------------------------------------------------------------------------------------------------------------------------------------------------------------------------------------------------------------------------------------------------------------------------------------------------------------------------------------------------------------------------------------------------------------------------|
| Random sequence generation (selection bias)               | Low risk           | Paper states that the patients were randomized without providing additional details                                                                                                                                                                                                                                                                                                                                                                                                             |
| Allocation concealment (selection bias)                   | Unclear risk       | No details provided regarding allocation concealment.                                                                                                                                                                                                                                                                                                                                                                                                                                           |
| Blinding of participants and personnel (performance bias) | High risk          | Trial is defined as "open-label".                                                                                                                                                                                                                                                                                                                                                                                                                                                               |
| Blinding of outcome assessment (detection bias)           | Low risk           | Quote:"All ratings were performed by clinicians who were not aware of the patients' treatment assignment."                                                                                                                                                                                                                                                                                                                                                                                      |
| Incomplete outcome data (attrition bias)                  | High risk          | Quote:"Thirty-five patients were enrolled in the study. Of these, 6 patients declined to participate after learning of their treatment assignment [...]" p. 639. Although non explicitly stated, the number of randomized subjects was 35. The attrition rate was very high for the PANSS outcome: (QUET: 6/21: 29%, HALD: 7/14: 50%), for the survival curve (QUET: 5/21: 24%, HALD: 9/14: 36%). No details are provided regarding the number of analysed subjects for the remaining outcomes. |
| Selective reporting (reporting bias)                      | Unclear risk       | No protocol available. In the paper the outcomes are pre-specified before the results, without a clear definition of primary and secondary ones. Results from the Simpson-Angus Scale and Barnes Akathisia Acale are only shortly and qualitatively reported.                                                                                                                                                                                                                                   |
| Other bias                                                | High risk          | AstraZeneca supported the trial along with the Department of Veterans Affairs Medical Research Service. It is stated that editorial support was provided by the industry sponsor, but its role in designing and carrying out the trial is not described.                                                                                                                                                                                                                                        |
| Overall (CINeMA)                                          | High risk          |                                                                                                                                                                                                                                                                                                                                                                                                                                                                                                 |

*Green 2015*

| Bias                                                      | Authors' judgement | Support for judgement                                                                                                                                                                                                                                                                                                                                                                                                                                                                                                                                      |
|-----------------------------------------------------------|--------------------|------------------------------------------------------------------------------------------------------------------------------------------------------------------------------------------------------------------------------------------------------------------------------------------------------------------------------------------------------------------------------------------------------------------------------------------------------------------------------------------------------------------------------------------------------------|
| Random sequence generation (selection bias)               | Low risk           | Quote:"Randomization was stratified by use of oral risperidone at recruitment" p 1360. Comment: methods for generation of the random sequence are not reported.                                                                                                                                                                                                                                                                                                                                                                                            |
| Allocation concealment (selection bias)                   | Unclear risk       | No details are provided regarding allocation concealment                                                                                                                                                                                                                                                                                                                                                                                                                                                                                                   |
| Blinding of participants and personnel (performance bias) | High risk          | Quote:"the open-label nature of the study could have potentially led to biases in the way subjects were treated and the way in which they reported outcomes" p. 1364. Comment: open-label study.                                                                                                                                                                                                                                                                                                                                                           |
| Blinding of outcome assessment (detection bias)           | Low risk           | Quote:"At these visits, unblinded study investigators assessed participants for overall response to treatment and adverse events; and trained, blinded raters assessed participants for alcohol and other substance use, psychiatric symptoms, and treatment utilization" p 1360 "Blinding was maintained by ensuring that raters did not participate in the treatment aspects of the study, and patients were asked not to discuss the details of their treatment with raters." p 1361. Comment: blinding of assessors of rating scales likely effective. |
| Incomplete outcome data (attrition bias)                  | Unclear risk       | Quote:"For the intent-to-treat analyses, data were censored (1) for the rest of the study if a subject was given clozapine or received a medication thought to decrease alcohol use or (2) for every week that a subject was in the hospital or otherwise incarcerated for more than 4 days during that week." p 1361<br>Comment: completers rate as from the clincialtrials.gov registration website for NCT00130923: Risperidone                                                                                                                         |

|                                      |              |                                                                                                                                                                                                                                                                                                                           |
|--------------------------------------|--------------|---------------------------------------------------------------------------------------------------------------------------------------------------------------------------------------------------------------------------------------------------------------------------------------------------------------------------|
|                                      |              | oral: 32/46 (69.6%), risperidone LAI 36/49 (73.5%). An ITT approach was employed but not as a primary outcome of the trial. Results are reported in not enough detail to establish how many participants were included in the ITT analyses                                                                                |
| Selective reporting (reporting bias) | Unclear risk | The primary outcome has been originally described as (quote - NCT00130923 6/12/2007) "Alcohol use assessed by the Timeline Followback scale 6 months" and later changed to (quote - NCT00130923 23/09/2012) "Mean Heavy Drinking Days Per Week". Secondary outcome are not fully reported in the paper (PANSS, CGI, GAF). |
| Other bias                           | Low risk     | Quote:"The sponsor [Janssen Pharmaceutical] had no role in the study itself. The investigators requested information from the sponsor regarding clinical use of LAI risperidone" p 1364                                                                                                                                   |
| Overall (CINeMA)                     | Unclear risk |                                                                                                                                                                                                                                                                                                                           |

Hirsh 1973

| Bias                                                      | Authors' judgement | Support for judgement                                                                                                                                                                                                                                                                                                                                                                                                                                                                                              |
|-----------------------------------------------------------|--------------------|--------------------------------------------------------------------------------------------------------------------------------------------------------------------------------------------------------------------------------------------------------------------------------------------------------------------------------------------------------------------------------------------------------------------------------------------------------------------------------------------------------------------|
| Random sequence generation (selection bias)               | Low risk           | Quote:"Patients were randomly allocated by a research assistant to the active drug or placebo group as they came into the trial over a period of seven months. No one else knew who was on drug or placebo until after the data were analysed." p 634. Comment: no details provided regarding strategy for generation of random sequence                                                                                                                                                                           |
| Allocation concealment (selection bias)                   | Unclear risk       | See quote above: no details provided regarding allocation concealment                                                                                                                                                                                                                                                                                                                                                                                                                                              |
| Blinding of participants and personnel (performance bias) | Low risk           | See quote above. Moreover:"Questionnaires filled in as patients completed the trial give no indication that the community or the ward nurses giving the medication could discern which patients had been receiving active medication. The same was true of general practitioners. They rarely saw a patient unless there was a crisis or the patient became ill. Patients seemed unaware of any change". Although not enough details are provided regarding the means to ensure blinding, it was likely effective. |
| Blinding of outcome assessment (detection bias)           | Unclear risk       | No details provided regarding blinding of outcome assessors.                                                                                                                                                                                                                                                                                                                                                                                                                                                       |
| Incomplete outcome data (attrition bias)                  | Low risk           | Analyses have been conducted by a per protocol approach, with low attrition rates: PBO: 3/41 7.3%, FLUPH-D: 4/40 10%                                                                                                                                                                                                                                                                                                                                                                                               |
| Selective reporting (reporting bias)                      | Unclear risk       | No protocol available. No clearly predefined primary and secondary outcomes.                                                                                                                                                                                                                                                                                                                                                                                                                                       |
| Other bias                                                | Low risk           | No industry involvement. No other source of bias detected.                                                                                                                                                                                                                                                                                                                                                                                                                                                         |
| Overall (CINeMA)                                          | Low risk           |                                                                                                                                                                                                                                                                                                                                                                                                                                                                                                                    |

Hirsh 1978

| Bias                                                      | Authors' judgement | Support for judgement                                                                                                    |
|-----------------------------------------------------------|--------------------|--------------------------------------------------------------------------------------------------------------------------|
| Random sequence generation (selection bias)               | Low risk           | The study is defined as a "double-blind trial", and no more details are provided.                                        |
| Allocation concealment (selection bias)                   | Unclear risk       | See above.                                                                                                               |
| Blinding of participants and personnel (performance bias) | Low risk           | See above.                                                                                                               |
| Blinding of outcome assessment (detection bias)           | Unclear risk       | No details provided regarding blinding of outcome assessors.                                                             |
| Incomplete outcome data (attrition bias)                  | High risk          | 30% dropped out of treatment (not clear how many in each arm). No details provided on the analysis methodology employed. |
| Selective reporting (reporting bias)                      | Unclear risk       | No protocol available. No clearly predefined primary and secondary outcomes.                                             |
| Other bias                                                | Unclear risk       | No details on the funder are provided.                                                                                   |
| Overall (CINeMA)                                          | Unclear risk       |                                                                                                                          |

Hogarty 1979

| Bias                                                      | Authors' judgement | Support for judgement                                                                                                                                                                                                                                                                                                                                                                                                                                                                                        |
|-----------------------------------------------------------|--------------------|--------------------------------------------------------------------------------------------------------------------------------------------------------------------------------------------------------------------------------------------------------------------------------------------------------------------------------------------------------------------------------------------------------------------------------------------------------------------------------------------------------------|
| Random sequence generation (selection bias)               | Low risk           | Quote:"105 schizophrenic patients were randomly assigned to a clinic to receive either oral fluphenazine hydrochloride or long-actingfluphenazine decanoate. Within the two drug conditions, patients were randomly assigned to either intensive ST (high ST) or routine surveillance (low ST). Thus, four distinct treatment groups were created" p1284. Comment: no details are provided regarding the generation of the random sequence                                                                   |
| Allocation concealment (selection bias)                   | Unclear risk       | No details provided regarding allocation concealment                                                                                                                                                                                                                                                                                                                                                                                                                                                         |
| Blinding of participants and personnel (performance bias) | Low risk           | Quote"The active and placebo form of the medication were identical in appearance" p1284. Comment: doble dummy procedure employed                                                                                                                                                                                                                                                                                                                                                                             |
| Blinding of outcome assessment (detection bias)           | Unclear risk       | No details provided                                                                                                                                                                                                                                                                                                                                                                                                                                                                                          |
| Incomplete outcome data (attrition bias)                  | High risk          | Dropout rates are not reported in the text, however, according to the number of analyzed patients reported in table 2, they seem to be very high: depot arm 32/55 (58.2%), oral arm 37/50 (74%). No details provided on the management of missing data in the analysis. According to table 3 the analysis of the primary outcome (relapse rate) was performed on an intention-to-treat basis (all randomized patients are reported as the denominator), however the methods of imputation was not described. |
| Selective reporting (reporting bias)                      | High risk          | The criteria for deeming clinical deterioration are not explained. Moreover, the major role adjustment inventory scale results are not reported.                                                                                                                                                                                                                                                                                                                                                             |
| Other bias                                                | Low risk           | The study was supported by a public grant. A pharmaceutical company (Squibb and Sons Inc) only supplied medications.                                                                                                                                                                                                                                                                                                                                                                                         |
| Overall (CINeMA)                                          | Unclear risk       |                                                                                                                                                                                                                                                                                                                                                                                                                                                                                                              |

#### Hough 2010

| Bias                                                      | Authors' judgement | Support for judgement                                                                                                                                                                                                                                                                                                                                                                                                                                                                                            |
|-----------------------------------------------------------|--------------------|------------------------------------------------------------------------------------------------------------------------------------------------------------------------------------------------------------------------------------------------------------------------------------------------------------------------------------------------------------------------------------------------------------------------------------------------------------------------------------------------------------------|
| Random sequence generation (selection bias)               | Low risk           | Quote:"were randomized in a 1:1 ratio (via a sponsor-prepared computer-generated randomization scheme; assigned by an interactive voice-response system) to receive either paliperidone palmitate (at the previously stabilized dose), or placebo." p 108.                                                                                                                                                                                                                                                       |
| Allocation concealment (selection bias)                   | Low risk           | See quote above                                                                                                                                                                                                                                                                                                                                                                                                                                                                                                  |
| Blinding of participants and personnel (performance bias) | Low risk           | Trial described as double blind. Quote "Paliperidone palmitate was provided as prefilled syringes containing 25, 50, or 100mg eq paliperidone palmitate (or matching placebo [Intralipid® 20% injectable emulsion])." p 108.                                                                                                                                                                                                                                                                                     |
| Blinding of outcome assessment (detection bias)           | Unclear risk       | No details provided regarding blinding of outcome assessor.                                                                                                                                                                                                                                                                                                                                                                                                                                                      |
| Incomplete outcome data (attrition bias)                  | Low risk           | Quote:"All efficacy analyses (interim and final) from the double-blind phase used the intent-to-treat (ITT) analysis set, which included all randomized patients who received at least one injection in the double-blind phase and had data available at the time of interim analysis cut-offdate or through study completion date. Safety analysis set for the double-blind phase was the same as the ITT analysis set." With this loose ITT approach, attrition rate were low: PP: 1/206 0.5%, PBO 1/204 0.5%. |
| Selective reporting (reporting bias)                      | Low risk           | The paper pre specifies primary and secondary outcomes (clinicaltrial.gov registration entry less accurate but coherent). All the outcomes are reported, although some minor ones just in a narrative fashion.                                                                                                                                                                                                                                                                                                   |
| Other bias                                                | High risk          | Quote:"This study was funded by Johnson & Johnson Pharmaceutical Research & Development, L.L.C., Raritan, New Jersey, USA. The employees of the sponsor and consultants for the study were directly involved in the design of the study, the collection, analysis and interpretation of data, the writing of the report and in the decision to submit this paper for publication."                                                                                                                               |
| Overall (CINeMA)                                          | Low risk           |                                                                                                                                                                                                                                                                                                                                                                                                                                                                                                                  |

#### Hranov 1998

| Bias | Authors' judgement | Support for judgement |
|------|--------------------|-----------------------|
|      |                    |                       |

|                                                           |              |                                                                                                                              |
|-----------------------------------------------------------|--------------|------------------------------------------------------------------------------------------------------------------------------|
| Random sequence generation (selection bias)               | Low risk     | Described as "randomized", however no details are provided regarding the generation of the random sequence.                  |
| Allocation concealment (selection bias)                   | Unclear risk | No information provided.                                                                                                     |
| Blinding of participants and personnel (performance bias) | Unclear risk | No information provided.                                                                                                     |
| Blinding of outcome assessment (detection bias)           | Unclear risk | No information provided.                                                                                                     |
| Incomplete outcome data (attrition bias)                  | Unclear risk | Dropout rates: haloperidol LAI 4/21 (19%), fluphenazine LAI 6/20 (30%). No details on the analysis methodology are provided. |
| Selective reporting (reporting bias)                      | High risk    | In this abstract multiple outcomes are reported and many details are lacking (e.g. mean rating scale scores).                |
| Other bias                                                | Unclear risk | No information provided.                                                                                                     |
| Overall (CINeMA)                                          | Unclear risk |                                                                                                                              |

*Ishigooka 2015*

| Bias                                                      | Authors' judgement | Support for judgement                                                                                                                                                                                                                                                                                                                                                                                                                                                                                                                                                                              |
|-----------------------------------------------------------|--------------------|----------------------------------------------------------------------------------------------------------------------------------------------------------------------------------------------------------------------------------------------------------------------------------------------------------------------------------------------------------------------------------------------------------------------------------------------------------------------------------------------------------------------------------------------------------------------------------------------------|
| Random sequence generation (selection bias)               | Low risk           | Quote:"[patients] were randomized 1:1 to either aripiprazole once monthly group or oral aripiprazole group using permuted block method according to the instruction of the Interactive Voice Response System or the Interactive Web Response System" p422. The randomization process seems to imply a computer generated random sequence                                                                                                                                                                                                                                                           |
| Allocation concealment (selection bias)                   | Low risk           | See quote above. Allocation concealment via voice/web response system                                                                                                                                                                                                                                                                                                                                                                                                                                                                                                                              |
| Blinding of participants and personnel (performance bias) | Low risk           | A double dummy system is reported, however no description of the appearance of the placebo tablets/injections is provided                                                                                                                                                                                                                                                                                                                                                                                                                                                                          |
| Blinding of outcome assessment (detection bias)           | Low risk           | Quote:"In the double-blind phase, the treatment allocation code for the administration of the investigational product was double-blind, meaning that the investigators and the subjects did not know whether the treatment group was the aripiprazole once-monthly group or the oral aripiprazole group. The sponsor's trial personnel, such as those involved in monitoring (blinded), data management, or data analysis, did not access to the treatment allocation code during the conduct of the trial." p422. Comment: it seems likely that assessors were blinded to allocation              |
| Incomplete outcome data (attrition bias)                  | High risk          | The completers rate is <80% in both arms (aripiprazole once monthly 169/228 74%, aripiprazole oral 151/227 66%). According to the number of analysed patients in tables 3, 4 and 5 all randomised patients were included in the analyses, and a (loose) ITT approach is reported (p424). However, the imputational method employed (LOCF) is not appropriate in the context of a maintenance trial as it risks to overestimate the efficacy of the intervention. Moreover, some outcomes were analyzed according to a "per protocol" approach (see for example motor symptoms, weight gain, etc.). |
| Selective reporting (reporting bias)                      | High risk          | Primary outcome is reported as "The primary efficacy endpoint was the non-exacerbation of psychotic symptoms/non-relapse rate at Week 26 in the double-blind phase" p423 - on a trial lasting 52 weeks. Moreover, the primary outcome listed on the registration trial @ clinicaltrials.jp (JapicCTI-R171013) reads "Non-exacerbation of psychotic symptoms/non-relapse rate in Phase 3 calculated by the Kaplan-Meier method", that given the timeframe reported in the registration entry seems to imply a study endpoint timeframe.                                                             |
| Other bias                                                | High risk          | The trial was funded by Otsuka Pharmaceutical Co., Ltd. One of the authors is a company employee, an other company employee provided "editorial support". The role of the funder in planning and conducting the study and writing the paper is not clearly discussed                                                                                                                                                                                                                                                                                                                               |
| Overall (CINeMA)                                          | Low risk           |                                                                                                                                                                                                                                                                                                                                                                                                                                                                                                                                                                                                    |

*Jain 1975*

| Bias | Authors' judgement | Support for judgement |
|------|--------------------|-----------------------|
|------|--------------------|-----------------------|



|                                                           |              |                                                                                                                                                                                                                                 |
|-----------------------------------------------------------|--------------|---------------------------------------------------------------------------------------------------------------------------------------------------------------------------------------------------------------------------------|
| Random sequence generation (selection bias)               | Low risk     | Quote: "...randomly assigned...".                                                                                                                                                                                               |
| Allocation concealment (selection bias)                   | Unclear risk | Details of allocation concealment not reported                                                                                                                                                                                  |
| Blinding of participants and personnel (performance bias) | Unclear risk | Described as "double-blind". Blinding details not reported.                                                                                                                                                                     |
| Blinding of outcome assessment (detection bias)           | Unclear risk | See above.                                                                                                                                                                                                                      |
| Incomplete outcome data (attrition bias)                  | High risk    | Losses to follow-up relatively high and unbalanced between groups: 4 (27%) participants left the study early in the pipothiazine group and 1 (5%) in the fluphenazine group. Apparently, a per protocol analysis was performed. |
| Selective reporting (reporting bias)                      | High risk    | Protocol not available. The primary outcome is reported, although no SDs are presented.                                                                                                                                         |
| Other bias                                                | Low risk     | Partially supported by Public Health Service Grant from the Department of Health, Education and Welfare, Washington D.C.                                                                                                        |
| Overall (CINeMA)                                          | Unclear risk |                                                                                                                                                                                                                                 |

*Javed 1991*

| Bias                                                      | Authors' judgement | Support for judgement                                                                                                                                                                                                         |
|-----------------------------------------------------------|--------------------|-------------------------------------------------------------------------------------------------------------------------------------------------------------------------------------------------------------------------------|
| Random sequence generation (selection bias)               | Low risk           | Quote: "randomised". No further details.                                                                                                                                                                                      |
| Allocation concealment (selection bias)                   | Unclear risk       | Details of allocation concealment not reported                                                                                                                                                                                |
| Blinding of participants and personnel (performance bias) | Low risk           | Described as "double-blind". Blinding details not reported.                                                                                                                                                                   |
| Blinding of outcome assessment (detection bias)           | Unclear risk       | See above.                                                                                                                                                                                                                    |
| Incomplete outcome data (attrition bias)                  | Unclear risk       | 7/45 patients dropped out of the study. 1/7 died and 6/7 "dropped out for reasons not related to the treatment [...] did not keep up their appointments." The number of drop-outs not reported across the intervention group. |
| Selective reporting (reporting bias)                      | Unclear risk       | Protocol not available. All outcomes reported as mean scores (without SD): CGI, BPRS, Hamilton, SAS, Side effects checklist (side effects not described).                                                                     |
| Other bias                                                | Unclear risk       | Employees of Lundbeck are acknowledged, however the role of industry in planning and conducting the trial is not clear.                                                                                                       |
| Overall (CINeMA)                                          | Unclear risk       |                                                                                                                                                                                                                               |

*Jolley 1990*

| Bias                                                      | Authors' judgement | Support for judgement                                                                                                                                                                                                                                                                                                                 |
|-----------------------------------------------------------|--------------------|---------------------------------------------------------------------------------------------------------------------------------------------------------------------------------------------------------------------------------------------------------------------------------------------------------------------------------------|
| Random sequence generation (selection bias)               | Low risk           | Quote:"The patients were randomized into intermittent treatment (n=27) and control (n=27) groups." P. 838. no details provided regarding random sequence generation strategy.                                                                                                                                                         |
| Allocation concealment (selection bias)                   | Unclear risk       | See above: no details provided regarding allocation concealment                                                                                                                                                                                                                                                                       |
| Blinding of participants and personnel (performance bias) | Low risk           | Quote:"The control group (n=27) continued to receive fluphenazine decanoate in clinically optimal (that is, pretrial) doses, whereas in the intermittent group (n=27) equivalent doses of placebo injections were substituted under double blind conditions." P. 986. No further details provided.                                    |
| Blinding of outcome assessment (detection bias)           | Unclear risk       | No details provided.                                                                                                                                                                                                                                                                                                                  |
| Incomplete outcome data (attrition bias)                  | High risk          | No ITT approach employed. Attrition rates are very high regarding the outcomes on extrapyramidal side effects: FLUPH-D: 9/27 30%, INTERM 15/27 55%.                                                                                                                                                                                   |
| Selective reporting (reporting bias)                      | High risk          | Quote:" This paper is a report of clinical outcome after one year in terms of symptoms, treatment, and side effects. Data on social outcome will be reported separately after a longer period of follow up" Jolley 1989 p 986. Unclear if the two year timeframe was effectively pre planned. The report after 2 years follow up does |

|                  |              |                                                                                                                                                                                          |
|------------------|--------------|------------------------------------------------------------------------------------------------------------------------------------------------------------------------------------------|
|                  |              | not mention the Manchester scale, the Global Assessment Scale, the Herz early signs questionnaire, the Symptom check list 90. The results from the SAS-II are only narratively reported. |
| Other bias       | Low risk     | E. R. Squibb and Sond had a role only in providing active intervention and placebo. No other source of bias detected                                                                     |
| Overall (CINeMA) | Unclear risk |                                                                                                                                                                                          |

*Kamijima 2009*

| Bias                                                      | Authors' judgement | Support for judgement                                                                                                                                                                                                                                                                                                                                                                                                                                                                                                |
|-----------------------------------------------------------|--------------------|----------------------------------------------------------------------------------------------------------------------------------------------------------------------------------------------------------------------------------------------------------------------------------------------------------------------------------------------------------------------------------------------------------------------------------------------------------------------------------------------------------------------|
| Random sequence generation (selection bias)               | Unclear risk       | No details provided.                                                                                                                                                                                                                                                                                                                                                                                                                                                                                                 |
| Allocation concealment (selection bias)                   | Unclear risk       | No details provided.                                                                                                                                                                                                                                                                                                                                                                                                                                                                                                 |
| Blinding of participants and personnel (performance bias) | High risk          | The study employs an open label design.                                                                                                                                                                                                                                                                                                                                                                                                                                                                              |
| Blinding of outcome assessment (detection bias)           | High risk          | See above.                                                                                                                                                                                                                                                                                                                                                                                                                                                                                                           |
| Incomplete outcome data (attrition bias)                  | Unclear risk       | Dropout rates: risperidone LAI 24%; risperidone OS 23%. No further details available on the approach employed for the analyses. According to the reporting available from clinicaltrials.gov (NCT00240708) different analysis sets were defined in advance, and the primary outcome was measured on the "full analysis set", excluding "Patients who have not been treated with the investigational drug; Patients whose efficacy evaluation after treatment with the investigational drug was not conducted at all) |
| Selective reporting (reporting bias)                      | Low risk           | The primary endpoint was declared in advance according to the protocol registered in clinicaltrials.gov and reported.                                                                                                                                                                                                                                                                                                                                                                                                |
| Other bias                                                | High risk          | The study was sponsored and directed by Janssen Pharmaceutical K.K.                                                                                                                                                                                                                                                                                                                                                                                                                                                  |
| Overall (CINeMA)                                          | High risk          |                                                                                                                                                                                                                                                                                                                                                                                                                                                                                                                      |

*Kane 1979*

| Bias                                                      | Authors' judgement | Support for judgement                                                                                                       |
|-----------------------------------------------------------|--------------------|-----------------------------------------------------------------------------------------------------------------------------|
| Random sequence generation (selection bias)               | Low risk           | Quote:"[...] 16 patients [...] entered a double-blind placebo-controlled discontinuation study".                            |
| Allocation concealment (selection bias)                   | Unclear risk       | No details provided regarding allocation concealment.                                                                       |
| Blinding of participants and personnel (performance bias) | Low risk           | See above.                                                                                                                  |
| Blinding of outcome assessment (detection bias)           | Unclear risk       | No details provided regarding blinding of outcome assessors.                                                                |
| Incomplete outcome data (attrition bias)                  | Low risk           | Authors report only one dropout in the fluphenazine arm. The analysis of relapses was performed on all randomized patients. |
| Selective reporting (reporting bias)                      | Unclear risk       | No protocol available. Primary and secondary outcomes are not defined. Only the outcome relapse is reported.                |
| Other bias                                                | Unclear risk       | No disclosure is provided regarding the possible role of the industry in the study.                                         |
| Overall (CINeMA)                                          | Unclear risk       |                                                                                                                             |

*Kane 2003*

| Bias | Authors' judgement | Support for judgement |
|------|--------------------|-----------------------|
|------|--------------------|-----------------------|

|                                                           |              |                                                                                                                                                                                                                                                                                                                                                                                                                                                       |
|-----------------------------------------------------------|--------------|-------------------------------------------------------------------------------------------------------------------------------------------------------------------------------------------------------------------------------------------------------------------------------------------------------------------------------------------------------------------------------------------------------------------------------------------------------|
| Random sequence generation (selection bias)               | Low risk     | Quote:"A dynamic method [Pocock minimisation strategy] was used to randomly assign patients to treatment groups." P. 1126                                                                                                                                                                                                                                                                                                                             |
| Allocation concealment (selection bias)                   | Unclear risk | No details provided regarding allocation concealment                                                                                                                                                                                                                                                                                                                                                                                                  |
| Blinding of participants and personnel (performance bias) | Low risk     | Trial is described as double blind. Quote:"[...]patients with schizophrenia received intramuscular injections of long-acting risperidone [...] or placebo injections that were identical in appearance every 2 weeks." p 1126.                                                                                                                                                                                                                        |
| Blinding of outcome assessment (detection bias)           | Unclear risk | No details provided regarding blinding of outcome assessors                                                                                                                                                                                                                                                                                                                                                                                           |
| Incomplete outcome data (attrition bias)                  | Unclear risk | The authors employed a loose ITT (including subjects who received at least one dose and with at least one post baseline evaluation) by LOCF. Attrition rates would be overall low: PBO: 6/98 6.1%, RLAI25: 6/99 6.1%, RLAI50:5/103 4.8%, RLAI75: 13/100 13%; however, on the registration entry at clinicaltrials.gov (NCT00253136) 458 subjects are reported as randomized instead of 400 (paper-reported). Reasons for this difference are unclear. |
| Selective reporting (reporting bias)                      | High risk    | The SF-36 (Quality of life) outcome, reported as assessed in the registration entry at clinicaltrials.gov is missing from the paper.                                                                                                                                                                                                                                                                                                                  |
| Other bias                                                | High risk    | Johnson & Johnson founded the trial and employed some of the authors. The role of the funder in planning and conducting the study and writing the paper is not clearly discussed.                                                                                                                                                                                                                                                                     |
| Overall (CINeMA)                                          | Unclear risk |                                                                                                                                                                                                                                                                                                                                                                                                                                                       |

#### Kane 2010

| Bias                                                      | Authors' judgement | Support for judgement                                                                                                                                                                                                                                                                                                                                         |
|-----------------------------------------------------------|--------------------|---------------------------------------------------------------------------------------------------------------------------------------------------------------------------------------------------------------------------------------------------------------------------------------------------------------------------------------------------------------|
| Random sequence generation (selection bias)               | Low risk           | The study is described as randomized, however no further details are provided.                                                                                                                                                                                                                                                                                |
| Allocation concealment (selection bias)                   | Unclear risk       | No details provided.                                                                                                                                                                                                                                                                                                                                          |
| Blinding of participants and personnel (performance bias) | Low risk           | Quote: "Patients and study personnel were blind to treatment assignment". A double-dummy procedure was employed, however authors report that: "The staff administering injections were not part of the study team and provided no clinical ratings."                                                                                                          |
| Blinding of outcome assessment (detection bias)           | Unclear risk       | Measures for ensuring the blinding of the outcome assessor are not clearly discussed.                                                                                                                                                                                                                                                                         |
| Incomplete outcome data (attrition bias)                  | High risk          | Dropout rates are above 20% in almost all groups: LAI 45 mg: 68/144 (47.2%), LAI 150 mg: 50/140 (35.7%), LAI 300 mg: 34/141 (24.1%), LAI 405 mg: 96/318 (30.2%), oral group 64/322 (19.9%). A loose ITT analysis was employed, as apparently missing data were imputed with the LOCF approach only for those who underwent at least one follow-up assessment. |
| Selective reporting (reporting bias)                      | Low risk           | The primary and secondary outcomes are clearly pre-specified and reported in the text and tables.                                                                                                                                                                                                                                                             |
| Other bias                                                | High risk          | The study was supported by Eli Lilly and Company. The role of the funder in planning, conducting and writing the study are not clearly discussed. Further, table 2 e figure 1 of supplemental material do not match in terms of combined number of patients for the LAI arms.                                                                                 |
| Overall (CINeMA)                                          | Unclear risk       |                                                                                                                                                                                                                                                                                                                                                               |

#### Kane 2012

| Bias                                        | Authors' judgement | Support for judgement                                                                                                                                                                                                                                                                                                                                                                                                                                                                                                                         |
|---------------------------------------------|--------------------|-----------------------------------------------------------------------------------------------------------------------------------------------------------------------------------------------------------------------------------------------------------------------------------------------------------------------------------------------------------------------------------------------------------------------------------------------------------------------------------------------------------------------------------------------|
| Random sequence generation (selection bias) | Low risk           | Quote:"Subjects who met stability criteria (as defined above) on single-blind aripiprazole-IM- depot for 12 consecutive weeks were randomly assigned 2:1 to maintenance treatment (phase 4, up to 52 weeks) with aripiprazole-IM-depot at the dose they were receiving (400 or 300 mg) or placebo-IM-depot. Aripiprazole-IM-depot and placebo-IM-depot were administered every 4 weeks and injected into the gluteal muscle in an alternating fashion." p 618. Comment: no details provided regarding strategy of random sequence generation. |
| Allocation concealment (selection bias)     | Unclear risk       | See quote above: no details provided regarding allocation concealment                                                                                                                                                                                                                                                                                                                                                                                                                                                                         |

|                                                           |              |                                                                                                                                                                                                                                                                                                                                                                                                                                                                                                                                                                 |
|-----------------------------------------------------------|--------------|-----------------------------------------------------------------------------------------------------------------------------------------------------------------------------------------------------------------------------------------------------------------------------------------------------------------------------------------------------------------------------------------------------------------------------------------------------------------------------------------------------------------------------------------------------------------|
| Blinding of participants and personnel (performance bias) | Low risk     | Trial described as double blinded, however no details are provided regarding effective measures to ensure blinding.                                                                                                                                                                                                                                                                                                                                                                                                                                             |
| Blinding of outcome assessment (detection bias)           | Unclear risk | No details provided regarding blinding of outcome assessors                                                                                                                                                                                                                                                                                                                                                                                                                                                                                                     |
| Incomplete outcome data (attrition bias)                  | Low risk     | All of the outcomes reported on the registration entry on clinicaltrials.gov (NCT00705783) include almost all randomized patients by applying a loose LOCF ITT. There's a mistake in the reporting of the number of analyzed patients on the mean change on PANSS total score: values are coherent with figure 3 of the papers that reports all of the randomized patients as randomized. Mean change of positive and negative subscales are reported and employing the same number of analyzed patients of figure 3, as moreover proof of a reporting mistake. |
| Selective reporting (reporting bias)                      | High risk    | Not all of the secondary outcomes listed on ct.gov are reported on the paper, although these results are available on the ct.gov registration entry. The secondary outcomes were not pre specified on ct.gov before publication of the paper but added thereafter. Moreover, the paper and a secondary publication (Kane 2015) report some secondary outcomes (AIMS, SAS, BARS, DAI, MAQ) not listed on the registration entry.                                                                                                                                 |
| Other bias                                                | High risk    | Otsuka Pharmaceutical employed most of the authors, supported the trial, founded editorial support. The company role in designing and conducting the trial is not further described.                                                                                                                                                                                                                                                                                                                                                                            |
| Overall (CINeMA)                                          | Unclear risk |                                                                                                                                                                                                                                                                                                                                                                                                                                                                                                                                                                 |

*Kaneno 1991*

| Bias                                                      | Authors' judgement | Support for judgement                                                                                                                                                                            |
|-----------------------------------------------------------|--------------------|--------------------------------------------------------------------------------------------------------------------------------------------------------------------------------------------------|
| Random sequence generation (selection bias)               | Unclear risk       | WARNING: COULD NOT LOCATE THE ORIGINAL PAPER. Risk of Bias derived from Kishi et al. Schiz Bull 2016;42(6):1438–45; supplementary material, although reasons for RoB judgments are not reported. |
| Allocation concealment (selection bias)                   | Unclear risk       | See above.                                                                                                                                                                                       |
| Blinding of participants and personnel (performance bias) | Unclear risk       | See above.                                                                                                                                                                                       |
| Blinding of outcome assessment (detection bias)           | Unclear risk       | See above.                                                                                                                                                                                       |
| Incomplete outcome data (attrition bias)                  | Unclear risk       | See above.                                                                                                                                                                                       |
| Selective reporting (reporting bias)                      | High risk          | See above.                                                                                                                                                                                       |
| Other bias                                                | Unclear risk       | See above.                                                                                                                                                                                       |
| Overall (CINeMA)                                          | Unclear risk       |                                                                                                                                                                                                  |

*Kelly 1977*

| Bias                                                      | Authors' judgement | Support for judgement                                                                                                                                   |
|-----------------------------------------------------------|--------------------|---------------------------------------------------------------------------------------------------------------------------------------------------------|
| Random sequence generation (selection bias)               | Low risk           | Quote: "The patients were randomly allocated ...". No details provided on sequence generation strategy                                                  |
| Allocation concealment (selection bias)                   | Low risk           | Quote:"the key to the allocation being known only to the hospital pharmacist and to the nurse administering the injections" p55                         |
| Blinding of participants and personnel (performance bias) | Unclear risk       | See quote above. No details reported regarding strategy for participants blinding. The trial is not described neither as double blind nor as open label |
| Blinding of outcome assessment (detection bias)           | Unclear risk       | No details reported regarding effective measures for blinding of the assessors                                                                          |

|                                          |              |                                                                                                                                                                                                                                                                                                                                                                                                                                                                                |
|------------------------------------------|--------------|--------------------------------------------------------------------------------------------------------------------------------------------------------------------------------------------------------------------------------------------------------------------------------------------------------------------------------------------------------------------------------------------------------------------------------------------------------------------------------|
| Incomplete outcome data (attrition bias) | Low risk     | The authors do not clearly report the number of patients allocated to each arm, but the overall randomised number (60-p55). Table I and II report 14/15/15/15 patients at week one, suggesting original randomization of 15 patients for each arm. Upon this assumption, no study arm had a drop out rate >20% at study end point (2/15 16%; 3/15 20%; 1/15 6.7%; 1/15 6.7%). No imputational strategy employed. 6 out of 7 of the dropped out patients did so due to relapse. |
| Selective reporting (reporting bias)     | Unclear risk | All prespecified outcomes are reported                                                                                                                                                                                                                                                                                                                                                                                                                                         |
| Other bias                               | High risk    | One author is an employee of E.R. Squibb & Sons, Twickenham. The role of the funder in planning and conducting the study and writing the paper is not clearly discussed.                                                                                                                                                                                                                                                                                                       |
| Overall (CINeMA)                         | Unclear risk |                                                                                                                                                                                                                                                                                                                                                                                                                                                                                |

*Keskiner 1967*

| Bias                                                      | Authors' judgement | Support for judgement                                                                                                                                                                                                                                                                                           |
|-----------------------------------------------------------|--------------------|-----------------------------------------------------------------------------------------------------------------------------------------------------------------------------------------------------------------------------------------------------------------------------------------------------------------|
| Random sequence generation (selection bias)               | Low risk           | Quote:"[...] the patients were randomly assigned into two groups.". Comment: no details regarding the generation of the random sequence are provided.                                                                                                                                                           |
| Allocation concealment (selection bias)                   | Unclear risk       | See quote above: no details provided regarding allocation concealment                                                                                                                                                                                                                                           |
| Blinding of participants and personnel (performance bias) | High risk          | Although the placebo injections are reported to be of sesame oil (and thus likely very similar to active intervention), the paper states:" If deterioration had occurred by the next due injection, placebo was replaced by fluphenazine decanoate 2.5 mg I.M. " p 167, implying that personellel was unblinded |
| Blinding of outcome assessment (detection bias)           | High risk          | No mention of blinding of outcome assessor, likely not done considering the above quote                                                                                                                                                                                                                         |
| Incomplete outcome data (attrition bias)                  | High risk          | Counting the patients switched within the placebo group from placebo to active compound as dropped out, attrition rates are high for this group: 8/11 72%                                                                                                                                                       |
| Selective reporting (reporting bias)                      | High risk          | No protocol available. The paper states clearly the trials's aims, but not primary or secondary outcomes. The drug induced psychosomatic scale results are not reported. The side effects are only briefly and narratively reported                                                                             |
| Other bias                                                | High risk          | The Squibb institute for Medical research was among the founders of the trial and provided the pluphenazine decanoate. The role of the funder in planning and conducting the study and writing the paper is not discussed.                                                                                      |
| Overall (CINeMA)                                          | High risk          |                                                                                                                                                                                                                                                                                                                 |

*Kissling 1985*

| Bias                                                      | Authors' judgement | Support for judgement                                                                                                           |
|-----------------------------------------------------------|--------------------|---------------------------------------------------------------------------------------------------------------------------------|
| Random sequence generation (selection bias)               | Low risk           | Patients were randomized by coin throwing.                                                                                      |
| Allocation concealment (selection bias)                   | Low risk           | See above.                                                                                                                      |
| Blinding of participants and personnel (performance bias) | Low risk           | A double-blind double-dummy procedure was employed.                                                                             |
| Blinding of outcome assessment (detection bias)           | Low risk           | See above.                                                                                                                      |
| Incomplete outcome data (attrition bias)                  | High risk          | The attrition rate was high: 30% in the haloperidol LAI arm and 60% in the fluphenazine LAI arm.                                |
| Selective reporting (reporting bias)                      | Unclear risk       | Protocol of the study not available. All relevant outcomes are reported, however a primary outcome is not explicitly mentioned. |
| Other bias                                                | Unclear risk       | No information about sponsorship bias nor conflict of interest are reported..                                                   |
| Overall (CINeMA)                                          | Low risk           |                                                                                                                                 |

*Koshikawa 2016*

| Bias | Authors' judgement | Support for judgement |
|------|--------------------|-----------------------|
|      |                    |                       |

|                                                           |              |                                                                                                                                                                                                                                                                                                                                                            |
|-----------------------------------------------------------|--------------|------------------------------------------------------------------------------------------------------------------------------------------------------------------------------------------------------------------------------------------------------------------------------------------------------------------------------------------------------------|
| Random sequence generation (selection bias)               | Low risk     | Quote:"Patients who satisfied the inclusion criteria were randomly allocated [...] using the pseudo-random number generation program of SPSS software" p36                                                                                                                                                                                                 |
| Allocation concealment (selection bias)                   | Low risk     | On the trail registration page ( <a href="https://upload.umin.ac.jp/cgi-open-bin/ctr_e/ctr_view.cgi?recptno=R000014342">https://upload.umin.ac.jp/cgi-open-bin/ctr_e/ctr_view.cgi?recptno=R000014342</a> , retrieved on 26.04.2019), under "concealment" the entry reads "Numbered container method".                                                      |
| Blinding of participants and personnel (performance bias) | High risk    | Quote:"Patients and raters were not blind to the patient group because this study had an open-label design" p. 36                                                                                                                                                                                                                                          |
| Blinding of outcome assessment (detection bias)           | Unclear risk | Not clear whether the assessors were blinded.                                                                                                                                                                                                                                                                                                              |
| Incomplete outcome data (attrition bias)                  | High risk    | Quote: "the final analysis included the 21 patients who completed this study (RLAI, n = 11; PP group, n = 10)." p37. A per protocol approach was employed, with an high attrition rate: RLAI 5/16 31%, PP 9/30 30%.                                                                                                                                        |
| Selective reporting (reporting bias)                      | High risk    | All of the primary outcomes described in the original trial registration are reported in either Koshikawa 2016 or in Takekita 2016. However, the JART-25 and SAS outcomes are not reported in neither of the papers (JART is stated to have been employed during screening phase, but is listed as "Key secondary outcome" in the trial registration page. |
| Other bias                                                | Low risk     | No other source of bias detected. no industry involvement. Self funded by Kansai Medical University                                                                                                                                                                                                                                                        |
| Overall (CINeMA)                                          | High risk    |                                                                                                                                                                                                                                                                                                                                                            |

#### Lapierre 1983

| Bias                                                      | Authors' judgement | Support for judgement                                                                                                                   |
|-----------------------------------------------------------|--------------------|-----------------------------------------------------------------------------------------------------------------------------------------|
| Random sequence generation (selection bias)               | Low risk           | Quote: "Treatment with pipotiazine palmitate and fluphenazine decanoate was randomized and administered under double-blind conditions". |
| Allocation concealment (selection bias)                   | Unclear risk       | No details provided.                                                                                                                    |
| Blinding of participants and personnel (performance bias) | Low risk           | See above.                                                                                                                              |
| Blinding of outcome assessment (detection bias)           | Unclear risk       | No details provided on the outcome assessment.                                                                                          |
| Incomplete outcome data (attrition bias)                  | Unclear risk       | No details on the number of dropouts. It is not clear whether all randomized patients were included in the analysis.                    |
| Selective reporting (reporting bias)                      | High risk          | No protocol was available. The discussion is narrowly focused on the factor analysis of AMDP (data not usable for the meta-analysis).   |
| Other bias                                                | Unclear risk       | No details provided.                                                                                                                    |
| Overall (CINeMA)                                          | Unclear risk       |                                                                                                                                         |

#### Leong 1989

| Bias                                                      | Authors' judgement | Support for judgement                                                                                                                                                                                                                                                                                                 |
|-----------------------------------------------------------|--------------------|-----------------------------------------------------------------------------------------------------------------------------------------------------------------------------------------------------------------------------------------------------------------------------------------------------------------------|
| Random sequence generation (selection bias)               | Low risk           | Quote:"patients were assigned the next available study number in numerical sequence and allocated to receive either [...]" p. 436. Unclear how the numerical sequence was generated                                                                                                                                   |
| Allocation concealment (selection bias)                   | Unclear risk       | See quote above.                                                                                                                                                                                                                                                                                                      |
| Blinding of participants and personnel (performance bias) | High risk          | Quote:"The administration of the study medications was open to the person giving the injections but the patient's symptoms and side effects, recorded after each four-week period of treatment, were assessed by one of the investigators who had no knowledge of which study medication had been prescribed". P. 436 |
| Blinding of outcome assessment (detection bias)           | Low risk           | See quote above                                                                                                                                                                                                                                                                                                       |

|                                          |           |                                                                                                                                                                                                        |
|------------------------------------------|-----------|--------------------------------------------------------------------------------------------------------------------------------------------------------------------------------------------------------|
| Incomplete outcome data (attrition bias) | Low risk  | Attrition rate low for both arms: Pipothiazine LAI 1/30 (3%), Fluphenazine LAI 2/30 (6%)                                                                                                               |
| Selective reporting (reporting bias)     | Low risk  | Although the CGI results are only narratively reported, all of the outcomes are reported                                                                                                               |
| Other bias                               | High risk | May Baker Clinical research Department employed one of the author, had a role in the processing of the statistical data. The role of the company in funding, designing etc the study is not addressed. |
| Overall (CINeMA)                         | Low risk  |                                                                                                                                                                                                        |

*Lundin 1992*

| Bias                                                      | Authors' judgement | Support for judgement                                                                                                                                                                                                               |
|-----------------------------------------------------------|--------------------|-------------------------------------------------------------------------------------------------------------------------------------------------------------------------------------------------------------------------------------|
| Random sequence generation (selection bias)               | Low risk           | Quote: "The patients were randomly allocated".                                                                                                                                                                                      |
| Allocation concealment (selection bias)                   | Unclear risk       | No details provided.                                                                                                                                                                                                                |
| Blinding of participants and personnel (performance bias) | Low risk           | Arguably, the study employed a double-blind fashion. Quote: "The doses were monitored blindly by units by the patient's psychiatrist as described by Dencker et al."                                                                |
| Blinding of outcome assessment (detection bias)           | Unclear risk       | No details provided on the outcome assessment.                                                                                                                                                                                      |
| Incomplete outcome data (attrition bias)                  | High risk          | Dropout rates (in the first 6 months of the study, before a further randomization to a psychosocial supportive program): flupenthixol LAI 6/28 (21.4%), fluphenazine LAI (30%). Apparently, a "per protocol" analysis was employed. |
| Selective reporting (reporting bias)                      | Unclear risk       | No protocol was available. The primary outcome is not clearly identified and multiple outcomes are reported.                                                                                                                        |
| Other bias                                                | Unclear risk       | No details provided.                                                                                                                                                                                                                |
| Overall (CINeMA)                                          | Unclear risk       |                                                                                                                                                                                                                                     |

*Macfadden 2010*

| Bias                                                      | Authors' judgement | Support for judgement                                                                                                                                                                                                                                                                                             |
|-----------------------------------------------------------|--------------------|-------------------------------------------------------------------------------------------------------------------------------------------------------------------------------------------------------------------------------------------------------------------------------------------------------------------|
| Random sequence generation (selection bias)               | Low risk           | Quote:"Subjects were randomly assigned in a 1:1 ratio to receive open-label RLAT" p 25. No details provided regarding strategy of random sequence generation.                                                                                                                                                     |
| Allocation concealment (selection bias)                   | Unclear risk       | No details provided regarding allocation concealment.                                                                                                                                                                                                                                                             |
| Blinding of participants and personnel (performance bias) | High risk          | Trial was open label with flexible dosages                                                                                                                                                                                                                                                                        |
| Blinding of outcome assessment (detection bias)           | Low risk           | Quote:"Assessments were made by raters who were blinded to drug-treatment information" p 25. Comment: probably done                                                                                                                                                                                               |
| Incomplete outcome data (attrition bias)                  | Low risk           | Attrition rates were low: a loose ITT approach was employed (subjects who had at least one administration of study drug as well as at least one follow-up efficacy measurement). RLAI: 2/179 1.1%, ARI-O 4/176 2.3%                                                                                               |
| Selective reporting (reporting bias)                      | High risk          | Quote:"The secondary objectives of the trial are to compare the effectiveness of Risperdal Consta to that of Abilify, as assessed by time to remission, as well as safety/tolerability, subject impact, and social impact." clinicaltrials.gov/NCT00299702. Of these secondary outcomes, only TEAEs are reported. |
| Other bias                                                | High risk          | All of the authors were employed by Janssen at the time of trial, Janssen supported the trial, and its role in designing and carrying out the trial is not described.                                                                                                                                             |
| Overall (CINeMA)                                          | High risk          |                                                                                                                                                                                                                                                                                                                   |

*McCreadie 1980*

| Bias                                                      | Authors' judgement | Support for judgement                                                                                                                                                                                                                                                                               |
|-----------------------------------------------------------|--------------------|-----------------------------------------------------------------------------------------------------------------------------------------------------------------------------------------------------------------------------------------------------------------------------------------------------|
| Random sequence generation (selection bias)               | Low risk           | Quote:"Patients were randomly and blindly allocated either to continue on fluphenazine decanoate [...] or to receive the approximate therapeutic equivalent of pimozide [...] wich was given four days each week" p 511. Comment: no details provided regarding random sequence generation strategy |
| Allocation concealment (selection bias)                   | Unclear risk       | See quote above: no details provided regarding allocation concealment                                                                                                                                                                                                                               |
| Blinding of participants and personnel (performance bias) | Low risk           | A double dummy procedure is described                                                                                                                                                                                                                                                               |
| Blinding of outcome assessment (detection bias)           | Unclear risk       | No details provided regarding blinding of outcome assessors.                                                                                                                                                                                                                                        |
| Incomplete outcome data (attrition bias)                  | Low risk           | All but one patients randomized were considered for the relapse outcome. The Hamilton-Lorr, Krawiecka, tardive dyskinesia and Wing ward behaviour scales scores were not reported: unable to assess attrition rates for these outcomes                                                              |
| Selective reporting (reporting bias)                      | High risk          | No protocol available. See above: Hamilton-Lorr, Krawiecka, tardive dyskinesia and Wing ward behaviour scales scores were not reported.                                                                                                                                                             |
| Other bias                                                | High risk          | One of the authors was an employee of Janssen Pharmaceutica. Personnel from Janssen and E.R. Squibb is acknowledged for providing "advice" and supplying the medication. The role of these personnel is not further discussed.                                                                      |
| Overall (CINeMA)                                          | Unclear risk       |                                                                                                                                                                                                                                                                                                     |

*McCreadie 1982*

| Bias                                                      | Authors' judgement | Support for judgement                                                                                                                                                                                                                                                                                                                       |
|-----------------------------------------------------------|--------------------|---------------------------------------------------------------------------------------------------------------------------------------------------------------------------------------------------------------------------------------------------------------------------------------------------------------------------------------------|
| Random sequence generation (selection bias)               | Low risk           | Quote:"Patients were randomly and blindly allocated to either pimozide or fluphenazine decanoate" p 280. Comment: no details provided regarding random sequence generation strategy                                                                                                                                                         |
| Allocation concealment (selection bias)                   | Unclear risk       | See quote above: no details provided regarding allocation concealment                                                                                                                                                                                                                                                                       |
| Blinding of participants and personnel (performance bias) | Low risk           | A double dummy procedure is described                                                                                                                                                                                                                                                                                                       |
| Blinding of outcome assessment (detection bias)           | Unclear risk       | No details provided regarding blinding of outcome assessors                                                                                                                                                                                                                                                                                 |
| Incomplete outcome data (attrition bias)                  | Low risk           | All of the randomized but one subject were considered for the relapse outcome. For the tardive dyskinesia outcome table II reports the total score at the time of withdrawal for non completers. The Hamilton-Lorr, Krawiecka and Wing ward behaviour scales scores were not reported, unable to assess attrition rates for these outcomes. |
| Selective reporting (reporting bias)                      | High risk          | No protocol available. See above: Hamilton-Lorr, Krawiecka and Wing ward behaviour scales scores were not reported.                                                                                                                                                                                                                         |
| Other bias                                                | High risk          | Personnel from Janssen and E.R. Squibb is acknowledged for providing "advice" and supplying the medication and other materials. The role of this personnel in trials design and carry-over is not further discussed.                                                                                                                        |
| Overall (CINeMA)                                          | Unclear risk       |                                                                                                                                                                                                                                                                                                                                             |

*McEvoy 2014*

| Bias                                        | Authors' judgement | Support for judgement                                                                                                                                                                                                                                                                                                   |
|---------------------------------------------|--------------------|-------------------------------------------------------------------------------------------------------------------------------------------------------------------------------------------------------------------------------------------------------------------------------------------------------------------------|
| Random sequence generation (selection bias) | Low risk           | Quote:"311 were found to be eligible and randomized to study treatment" p. 1979. Comment: do details provided regarding generation of random sequence.                                                                                                                                                                  |
| Allocation concealment (selection bias)     | Unclear risk       | No details provided regarding allocation concealment                                                                                                                                                                                                                                                                    |
| Blinding of participants and                | Low risk           | Quote:"Treatment condition was blinded from study physicians and all other personnel. Study physicians wrote orders for both of the potential I[medications] [...]. Each patient was then injected with only the randomly assigned drug. A clinician not otherwise involved in the trial administered the injection and |



|                                                 |           |                                                                                                                                                                                                                                                                                                                                                                                                                                                                                                                                                                                 |
|-------------------------------------------------|-----------|---------------------------------------------------------------------------------------------------------------------------------------------------------------------------------------------------------------------------------------------------------------------------------------------------------------------------------------------------------------------------------------------------------------------------------------------------------------------------------------------------------------------------------------------------------------------------------|
| personnel (performance bias)                    |           | concealed the identity of the medication from the patient and study personnel" p 1979-80. Comment: likely effective.                                                                                                                                                                                                                                                                                                                                                                                                                                                            |
| Blinding of outcome assessment (detection bias) | Low risk  | Quote:"outcome adjudication committee consisting of 3 research psychiatrists who were blind to treatment assignment and not otherwise involved in the study. A majority vote of the committee determined whether and when a participant experienced efficacy failure" p 1980. Comment: although not specified that the same blinding approach has been employed to the secondary outcomes, this seems likely. Moreover some of the secondary outcomes are "hard" (weight, blood testing...).                                                                                    |
| Incomplete outcome data (attrition bias)        | High risk | When considering the original outcomes listed on CT.gov at (NCT01136772), low attrition rates are found for the primary outcome (PP 12/157 7.6%, HD 9/154 5.8%), but very high for the PANSS change from baseline at 6 months (PP 66/157 42.0%, HD 66/154 42.8%) despite a loose ITT. On the supplementary material is reported the change from baseline for "selected months", of these timepoints only the 3 months timepoint yields attrition rates are below 20%.                                                                                                           |
| Selective reporting (reporting bias)            | High risk | The original registration entry at ct.gov (NCT01136772) reports specified time frame for assessing the primary and secondary outcomes (24 and 6 months). this was confirmed in later revision of the registration entry but the paper does not reflect that. Moreover, two secondary outcomes were cancelled (Clinical Global Impressions-Severity Scale (CGI-S) Alcohol Use Scale and Drug Use Scale (AUS/DUS)) within the time of conducting the trial and are not reported. The paper does report several secondary outcomes not mentioned on the CT.gov registration entry. |
| Other bias                                      | Low risk  | Trial funded by grants from NIMH, which had no role in designing and conducting the trials or analysing and interpreting the data. No other source of bias detected.                                                                                                                                                                                                                                                                                                                                                                                                            |
| Overall (CINeMA)                                | Low risk  |                                                                                                                                                                                                                                                                                                                                                                                                                                                                                                                                                                                 |

#### McKane 1987

| Bias                                                      | Authors' judgement | Support for judgement                                                                                                                                                                                                                                                                                                                                              |
|-----------------------------------------------------------|--------------------|--------------------------------------------------------------------------------------------------------------------------------------------------------------------------------------------------------------------------------------------------------------------------------------------------------------------------------------------------------------------|
| Random sequence generation (selection bias)               | Low risk           | Quote:"Patients were randomly and blindly allocated to injections every 4 weeks of haloperidol decanoate or fluphenazine decanoate" p 333. Comment: No details provided regarding generation of random sequence                                                                                                                                                    |
| Allocation concealment (selection bias)                   | Unclear risk       | See above quote: no details provided regarding allocation concealment                                                                                                                                                                                                                                                                                              |
| Blinding of participants and personnel (performance bias) | Low risk           | Trial is described as double-blind, although no further details are provided.                                                                                                                                                                                                                                                                                      |
| Blinding of outcome assessment (detection bias)           | Unclear risk       | Quote:"It was the decision [to deem a patient relapsed] of the consultant psychiatrist who was responsible for the patient's care, and who was blind to which drug the patient was receiving" p 334. Blinding for outcome "relapse" is described in enough detail. However no details are provided regarding the blinding of the assessors for the other outcomes. |
| Incomplete outcome data (attrition bias)                  | High risk          | Attrition rate were high in both study arms: HALD: 8/19 42%, FLUPHD: 7/19 37%.                                                                                                                                                                                                                                                                                     |
| Selective reporting (reporting bias)                      | Unclear risk       | No protocol available. No clear definition of a primary outcome among the ones reported. Relapse rates are reported in details among the text. Most of the other outcomes are reported in a narrative way, rating scales as well.                                                                                                                                  |
| Other bias                                                | High risk          | Janssen Pharmaceutical is acknowledged "for financial and other assistance" (p 336), the industry role is not further described.                                                                                                                                                                                                                                   |
| Overall (CINeMA)                                          | Unclear risk       |                                                                                                                                                                                                                                                                                                                                                                    |

#### McLaren 1992

| Bias                                                      | Authors' judgement | Support for judgement                                                                                                                                                                                                                                                                                                                                                                                                              |
|-----------------------------------------------------------|--------------------|------------------------------------------------------------------------------------------------------------------------------------------------------------------------------------------------------------------------------------------------------------------------------------------------------------------------------------------------------------------------------------------------------------------------------------|
| Random sequence generation (selection bias)               | Low risk           | Patients were "randomly allocated". No details provided regarding generation of random sequence                                                                                                                                                                                                                                                                                                                                    |
| Allocation concealment (selection bias)                   | Unclear risk       | No details provided regarding allocation concealment                                                                                                                                                                                                                                                                                                                                                                               |
| Blinding of participants and personnel (performance bias) | Low risk           | Flexible dose design employed. Quote:"[...] dosage ratio of approximately 1:0.5 for bromperidol and fluphenazine in higher dosages ranges. Patients were therefore randomly allocated to receive either bromperidol decanoate or fluphenazine decanoate, in identical ampoules containing either 50mg bromperidol decanoate or 25mg fluphenazine decanoate" p 67. Comment: blinding of participants and personnel likely effective |

|                                                 |              |                                                                                                                                                                                                                                                                                            |
|-------------------------------------------------|--------------|--------------------------------------------------------------------------------------------------------------------------------------------------------------------------------------------------------------------------------------------------------------------------------------------|
| Blinding of outcome assessment (detection bias) | Unclear risk | No details provided regarding blindness of outcome assessors                                                                                                                                                                                                                               |
| Incomplete outcome data (attrition bias)        | Unclear risk | Quote: "When all patients were included in the analysis no statistically significant differences [...] for changes in total score from entry to last recorded visit." Although authors employed a LOCF approach, the number of patients actually included in the analysis is not provided. |
| Selective reporting (reporting bias)            | High risk    | No endpoint scores at Krawiecka-Goldberg scale, NSRS, MARDRS, Simpson & Angus scale, MRSS, AIMS, weight measures and blood samples provided.                                                                                                                                               |
| Other bias                                      | High risk    | Janssen Pharmaceutical provided financial support. The role of the company in designing and conducting the study is not further addressed.                                                                                                                                                 |
| Overall (CINeMA)                                | Unclear risk |                                                                                                                                                                                                                                                                                            |

Mosolov 2008

| Bias                                                      | Authors' judgement | Support for judgement                                                                                                                                                                                                                                                                                                                                                                                                                                                   |
|-----------------------------------------------------------|--------------------|-------------------------------------------------------------------------------------------------------------------------------------------------------------------------------------------------------------------------------------------------------------------------------------------------------------------------------------------------------------------------------------------------------------------------------------------------------------------------|
| Random sequence generation (selection bias)               | Low risk           | Sequence of random number generated via Software (Statistica 6.0)                                                                                                                                                                                                                                                                                                                                                                                                       |
| Allocation concealment (selection bias)                   | Unclear risk       | No details provided regarding allocation concealment                                                                                                                                                                                                                                                                                                                                                                                                                    |
| Blinding of participants and personnel (performance bias) | High risk          | Although not clearly stated, the design appears to be open label.                                                                                                                                                                                                                                                                                                                                                                                                       |
| Blinding of outcome assessment (detection bias)           | Unclear risk       | No mention of blinding of outcome assessors (most likely not done)                                                                                                                                                                                                                                                                                                                                                                                                      |
| Incomplete outcome data (attrition bias)                  | Low risk           | ITT by LOCF employed, 20/20 for both arms analysed                                                                                                                                                                                                                                                                                                                                                                                                                      |
| Selective reporting (reporting bias)                      | Low risk           | No protocol available. Potapov 2008 (Poster session) reports as an outcome the categorization of patients according to 3 groups of PANNS improvement (<25%, 25-50%, >50%). This outcome is not reported on the main paper, who employs a >20% improvement on the PANSS. However, the main paper reports mean PANSS score at study endpoint as well, thus overcoming the risk of bias that converting the continuous PANSS scale to three categories would have brought. |
| Other bias                                                | Low risk           | No further source of bias detected.                                                                                                                                                                                                                                                                                                                                                                                                                                     |
| Overall (CINeMA)                                          | Low risk           |                                                                                                                                                                                                                                                                                                                                                                                                                                                                         |

NCT0092407

| Bias                                                      | Authors' judgement | Support for judgement                                                                                                                                                                                                                                   |
|-----------------------------------------------------------|--------------------|---------------------------------------------------------------------------------------------------------------------------------------------------------------------------------------------------------------------------------------------------------|
| Random sequence generation (selection bias)               | Low risk           | The study is described as randomized, however no details on the sequence generation process are provided.                                                                                                                                               |
| Allocation concealment (selection bias)                   | Unclear risk       | No details provided.                                                                                                                                                                                                                                    |
| Blinding of participants and personnel (performance bias) | High risk          | An open-label design was employed.                                                                                                                                                                                                                      |
| Blinding of outcome assessment (detection bias)           | Unclear risk       | No details provided.                                                                                                                                                                                                                                    |
| Incomplete outcome data (attrition bias)                  | High risk          | Dropout rates were extremely high: LAI group 31/37 (83.8%), oral group 24/38 (63.1%). Apparently, some imputation method was employed, considering that 17 and 24 patients, respectively, were analyzed, however this is not discussed in the protocol. |
| Selective reporting (reporting bias)                      | Low risk           | Primary and secondary outcomes are clearly pre-specified and reported in tables.                                                                                                                                                                        |
| Other bias                                                | High risk          | Janssen Korea funded the study and its role in planning and conducting it was not discussed. Baseline measures are not reported for all randomized patients, but only for those who were analyzed.                                                      |
| Overall (CINeMA)                                          | High risk          |                                                                                                                                                                                                                                                         |

Odejide 1982

| Bias                                                      | Authors' judgement | Support for judgement                                                                                                                                                                                                                                                                                                                                                                                                                                                         |
|-----------------------------------------------------------|--------------------|-------------------------------------------------------------------------------------------------------------------------------------------------------------------------------------------------------------------------------------------------------------------------------------------------------------------------------------------------------------------------------------------------------------------------------------------------------------------------------|
| Random sequence generation (selection bias)               | Low risk           | Quote:"In each pair, one patient was given the active drug and the other received the inactive placebo, with assignment based on randomization schedule" p 195.                                                                                                                                                                                                                                                                                                               |
| Allocation concealment (selection bias)                   | High risk          | See quote above. No allocation concealment reported with a vulnerable randomization strategy                                                                                                                                                                                                                                                                                                                                                                                  |
| Blinding of participants and personnel (performance bias) | Unclear risk       | "Patients were unaware of the content of their injections" p .195 "Dosages were 2 cc (25 mg/cc) of fluphenazine decanoate or 2 cc of vitamin B complex given intramuscularly at each follow up clinic visit" p 195. Comment: vitamin B injections are well known for being associated with burning sensation on injection site. It can not be ruled out that this phenomenon could have lead to unblinding of patients. No mention of blinding of who administered the drugs. |
| Blinding of outcome assessment (detection bias)           | Low risk           | "The psychiatrist who evaluated follow-up status was blind to treatment status" p 195. Most likely done.                                                                                                                                                                                                                                                                                                                                                                      |
| Incomplete outcome data (attrition bias)                  | High risk          | No ITT approach was performed. Subjects excluded from the analyses PBO: 8/35 22.9%, FLUPH-D: 9/35 25.7%. Attrition rates were overall high.                                                                                                                                                                                                                                                                                                                                   |
| Selective reporting (reporting bias)                      | High risk          | No protocol available. No clearly prespecified primary and secondary outcomes. The BPRS scale is reported in a categorical way instead of by means. The AIMS scale reported only narratively.                                                                                                                                                                                                                                                                                 |
| Other bias                                                | Low risk           | No industry involvement. No other source of bias detected                                                                                                                                                                                                                                                                                                                                                                                                                     |
| Overall (CINeMA)                                          | High risk          |                                                                                                                                                                                                                                                                                                                                                                                                                                                                               |

Pinto 1979

| Bias                                                      | Authors' judgement | Support for judgement                                                                                                                                                                                                                                                                                                                                                                                                                                                                                                                                                          |
|-----------------------------------------------------------|--------------------|--------------------------------------------------------------------------------------------------------------------------------------------------------------------------------------------------------------------------------------------------------------------------------------------------------------------------------------------------------------------------------------------------------------------------------------------------------------------------------------------------------------------------------------------------------------------------------|
| Random sequence generation (selection bias)               | Low risk           | Quote: "[...] randomly allocated for treatment with either flupenthixol or fluphenazine depot injections. [...] The trial was organised on a double blind basis. The depot injections used were the standard ampoules available in Britain but the injections were prepared and administered by nursing staff who kept the rating clinicians in ignorance of the allocation of patients to treatment groups. Neither the clinician nor the patients were aware of the treatment allocation. An independent clinician who had no part in the assessments prescribed the drugs". |
| Allocation concealment (selection bias)                   | Unclear risk       | See above.                                                                                                                                                                                                                                                                                                                                                                                                                                                                                                                                                                     |
| Blinding of participants and personnel (performance bias) | Low risk           | See above.                                                                                                                                                                                                                                                                                                                                                                                                                                                                                                                                                                     |
| Blinding of outcome assessment (detection bias)           | Unclear risk       | See above.                                                                                                                                                                                                                                                                                                                                                                                                                                                                                                                                                                     |
| Incomplete outcome data (attrition bias)                  | High risk          | Dropout rate: flupenthixol LAI 0/31 (0%); fluphenazine LAI 8/33 (24.2%). A per protocol analysis was performed.                                                                                                                                                                                                                                                                                                                                                                                                                                                                |
| Selective reporting (reporting bias)                      | Unclear risk       | Protocol not available. No clear distinction is made between primary and secondary outcomes. The outcome BPRS is reported in detail.                                                                                                                                                                                                                                                                                                                                                                                                                                           |
| Other bias                                                | Low risk           | Possible role of the industry in funding, planning and writing the study is not reported. Apparently, the study was conducted independently from industry.                                                                                                                                                                                                                                                                                                                                                                                                                     |
| Overall (CINeMA)                                          | Unclear risk       |                                                                                                                                                                                                                                                                                                                                                                                                                                                                                                                                                                                |

Potkin 2017

| Bias                                        | Authors' judgement | Support for judgement                                                                                                                                                                                                                                                |
|---------------------------------------------|--------------------|----------------------------------------------------------------------------------------------------------------------------------------------------------------------------------------------------------------------------------------------------------------------|
| Random sequence generation (selection bias) | Low risk           | Quote:"Randomization was stratified by age ( $\leq 35$ years or $>35$ years) and was achieved using an interactive voice response system using block randomization to ensure that equal numbers of patients entered each treatment group within each stratum." p 42. |

|                                                           |           |                                                                                                                                                                                                                                                                                                                                                                                                                                                                                                                                                                                                                                                                                                                                                                                                                                                                                                                                            |
|-----------------------------------------------------------|-----------|--------------------------------------------------------------------------------------------------------------------------------------------------------------------------------------------------------------------------------------------------------------------------------------------------------------------------------------------------------------------------------------------------------------------------------------------------------------------------------------------------------------------------------------------------------------------------------------------------------------------------------------------------------------------------------------------------------------------------------------------------------------------------------------------------------------------------------------------------------------------------------------------------------------------------------------------|
| Allocation concealment (selection bias)                   | Low risk  | See quote above                                                                                                                                                                                                                                                                                                                                                                                                                                                                                                                                                                                                                                                                                                                                                                                                                                                                                                                            |
| Blinding of participants and personnel (performance bias) | High risk | Open label trial                                                                                                                                                                                                                                                                                                                                                                                                                                                                                                                                                                                                                                                                                                                                                                                                                                                                                                                           |
| Blinding of outcome assessment (detection bias)           | High risk | Raters for QLS and IAQ were blinded to treatment assignment and had no access to medical records, study file, study medications (Naber 2015 p500). Raters for all other outcomes (comprising CGI) were not blinded                                                                                                                                                                                                                                                                                                                                                                                                                                                                                                                                                                                                                                                                                                                         |
| Incomplete outcome data (attrition bias)                  | Low risk  | Quote:"Effectiveness data is based on all patients who received study medicine, who had a valid baseline assessment, and at least 1 valid post-baseline assessment of the QLS (Full analysis set)" (NCT01795547 CT.gov). Attrition rate for the CGI-S outcome: PP 16/148: 10.8%, AOM400 11/147: 7.5%                                                                                                                                                                                                                                                                                                                                                                                                                                                                                                                                                                                                                                       |
| Selective reporting (reporting bias)                      | High risk | When comparing the available publications and results posted on ct.gov with the original secondary outcomes posted on ct.gov, the outcome "Risk of suicidality [ Time Frame: Up to 28 weeks and 4-week safety follow up ] Columbia-Suicide Severity Rating Scale (C-SSRS) score" is missing. Moreover, a secondary publication (Potkin 2017 - Int Clin Psychopharmacol. 2017 May;32(3):147-154. doi: 10.1097/YIC.000000000000168.) is based on the Arizona Sexual Experience Scale which is not listed as an outcome measure tool. Quote:"Preplanned secondary analyses included mean total CGI-I and IAQ scores at week 28 and changes from baseline in SWN-S and TooL at week 28." p 42, however, the original trial registration on CT.gov does not list the CGI-I but the CGI-S. The WoRQ tool is not listed as an outcome in the original trial registration on CT.gov. The overall risk of selective reporting is judged to be high. |
| Other bias                                                | High risk | Otsuka and Lundbeck founded the trial. Most of the authors but 2 were employees of the companies. All authors contributed to interpretation of the data. The role of the companies is designing and conducting the trial is not further described.                                                                                                                                                                                                                                                                                                                                                                                                                                                                                                                                                                                                                                                                                         |
| Overall (CINeMA)                                          | High risk |                                                                                                                                                                                                                                                                                                                                                                                                                                                                                                                                                                                                                                                                                                                                                                                                                                                                                                                                            |

Quitkin 1978

| Bias                                                      | Authors' judgement | Support for judgement                                                                                                                                                             |
|-----------------------------------------------------------|--------------------|-----------------------------------------------------------------------------------------------------------------------------------------------------------------------------------|
| Random sequence generation (selection bias)               | Low risk           | Quote:"In a double-blind random fashion each patient was assigned to [...]" p 890. Sequence generation strategy is not reported                                                   |
| Allocation concealment (selection bias)                   | Unclear risk       | No details are provided regarding sequence concealment                                                                                                                            |
| Blinding of participants and personnel (performance bias) | Low risk           | A double dummy approach was employed. Means to ensure placebo and active interventions could not be distinguished are described.                                                  |
| Blinding of outcome assessment (detection bias)           | Unclear risk       | Quote:" This judgment [relapse] was made by a treatment-blind psychiatrist" p 890. Unclear if the raters of the other outcomes were blinded.                                      |
| Incomplete outcome data (attrition bias)                  | High risk          | Results are poorly reported. No imputational strategy is mentioned, assuming a per protocol approach, attrition rates would be high: Pentifluridol 11/30 36%, FLUPH-D 14/30 46.7% |
| Selective reporting (reporting bias)                      | High risk          | Quote:"Relapse was not defined using strict operational criteria". The results of the scales employed (BPRS CGI KASP KARS SAS) are not provided.                                  |
| Other bias                                                | Low risk           | Results are poorly and partially reported. No industry involvement.                                                                                                               |
| Overall (CINeMA)                                          | Unclear risk       |                                                                                                                                                                                   |

Rifkin 1977

| Bias                                                      | Authors' judgement | Support for judgement                                                                                                                                                              |
|-----------------------------------------------------------|--------------------|------------------------------------------------------------------------------------------------------------------------------------------------------------------------------------|
| Random sequence generation (selection bias)               | Low risk           | The study is described as randomized, however details on the sequence generation are not reported.                                                                                 |
| Allocation concealment (selection bias)                   | Unclear risk       | No details provided.                                                                                                                                                               |
| Blinding of participants and personnel (performance bias) | Low risk           | A double-dummy procedure was employed.                                                                                                                                             |
| Blinding of outcome assessment (detection bias)           | Unclear risk       | No details provided.                                                                                                                                                               |
| Incomplete outcome data (attrition bias)                  | High risk          | Dropout rates are very high: LAI arm 13/23 (56.5%), oral arm 7/28 (25%), placebo arm 19/22 (86.4%). No details are provided on the management of missing patients in the analysis. |

|                                      |              |                                                                                                                                                                                                                                                             |
|--------------------------------------|--------------|-------------------------------------------------------------------------------------------------------------------------------------------------------------------------------------------------------------------------------------------------------------|
| Selective reporting (reporting bias) | Unclear risk | Data are poorly reported. The primary outcome (relapse rate) was clearly pre-specified. The number of patients experiencing relapse is reported, however tables report only the raw number of patients experiencing each outcome (relapse, toxicity, etc.). |
| Other bias                           | Low risk     | The study was supported by a public grant.                                                                                                                                                                                                                  |
| Overall (CINeMA)                     | Unclear risk |                                                                                                                                                                                                                                                             |

Rossi 1990

| Bias                                                      | Authors' judgement | Support for judgement                                                                                                                                                                                                                                                                                                                      |
|-----------------------------------------------------------|--------------------|--------------------------------------------------------------------------------------------------------------------------------------------------------------------------------------------------------------------------------------------------------------------------------------------------------------------------------------------|
| Random sequence generation (selection bias)               | Low risk           | Described as randomized. No details provided regarding generation of the random sequence.                                                                                                                                                                                                                                                  |
| Allocation concealment (selection bias)                   | High risk          | According to the authors, a "functional" double-blind design was employed, as one investigator "selects patients and assess parameters at follow-up visits", and another investigator "checks the allocation list and deliver the corresponding medication". This old-fashioned approach is at high risk for selection and detection bias. |
| Blinding of participants and personnel (performance bias) | Low risk           | The method employed for blinding (see above) is likely to guarantee the blindness of participants, who also received both medications with the same frequency.                                                                                                                                                                             |
| Blinding of outcome assessment (detection bias)           | High risk          | See above.                                                                                                                                                                                                                                                                                                                                 |
| Incomplete outcome data (attrition bias)                  | Low risk           | Dropouts are about 20% in both arms. Only patients who completed the study were included in the analysis (no ITT approach was employed), however the impact of this procedure might be mitigated by the relatively low number of dropouts.                                                                                                 |
| Selective reporting (reporting bias)                      | Low risk           | Protocol of the study not available. All outcomes of interest are reported.                                                                                                                                                                                                                                                                |
| Other bias                                                | Unclear risk       | No information about sponsorship bias nor conflict of interest are reported..                                                                                                                                                                                                                                                              |
| Overall (CINeMA)                                          | Low risk           |                                                                                                                                                                                                                                                                                                                                            |

Rossi 1992

| Bias                                                      | Authors' judgement | Support for judgement                                                                                                                                                                                                    |
|-----------------------------------------------------------|--------------------|--------------------------------------------------------------------------------------------------------------------------------------------------------------------------------------------------------------------------|
| Random sequence generation (selection bias)               | Low risk           | Described as randomized. No details provided regarding generation of the random sequence.                                                                                                                                |
| Allocation concealment (selection bias)                   | Unclear risk       | No details provided regarding allocation concealment.                                                                                                                                                                    |
| Blinding of participants and personnel (performance bias) | Low risk           | Quote: "i farmaci venivano forniti in confezioni indistinguibili al fine di salvaguardare la doppia cecità [With the purpose of safeguarding double blindness, drugs have been provided in undistinguishable packages]". |
| Blinding of outcome assessment (detection bias)           | Unclear risk       | No information provided regarding blinding of outcomes assessors                                                                                                                                                         |
| Incomplete outcome data (attrition bias)                  | High risk          | No denominator reported. Assuming dropped out patients were not included in the analyses (no imputational strategy is mentioned), the attrition rate would be overall very high: 9/20 45%                                |
| Selective reporting (reporting bias)                      | High risk          | The paper does not explicitly name a primary outcome. Side effects scale results are only summarized. SANS SANP HAM-D BPRS scales are reported without SD and denominator.                                               |
| Other bias                                                | Low risk           | No other source of bias detected.                                                                                                                                                                                        |
| Overall (CINeMA)                                          | Unclear risk       |                                                                                                                                                                                                                          |

Sampath 1992

| Bias                                        | Authors' judgement | Support for judgement                                                                                                                                                                                                                                                                                                                                                                     |
|---------------------------------------------|--------------------|-------------------------------------------------------------------------------------------------------------------------------------------------------------------------------------------------------------------------------------------------------------------------------------------------------------------------------------------------------------------------------------------|
| Random sequence generation (selection bias) | Low risk           | Quote:"At the end of this phase, 24 patients (from the initial sample of 30), who had remained clinically stable, were randomly allocated to either a placebo group who received injections without active medication or a control group who continued to receive their usual dose of fluphenazine decanoate" p 256. Comment: no details provided regarding generation of random sequence |

|                                                           |              |                                                                                                                                                                                                                                                                                                                                                                                                     |
|-----------------------------------------------------------|--------------|-----------------------------------------------------------------------------------------------------------------------------------------------------------------------------------------------------------------------------------------------------------------------------------------------------------------------------------------------------------------------------------------------------|
| Allocation concealment (selection bias)                   | Unclear risk | See quote above: no details provided regarding allocation concealment.                                                                                                                                                                                                                                                                                                                              |
| Blinding of participants and personnel (performance bias) | Low risk     | Quote: "The placebo injections consisted of sesame oil without the active drug in a volume identical to the original volume of the injection which the patient regularly received during initial phase of the study and was identical in physical appearance to the normal fluphenazine preparation. The researchers were blind to patients' treatments throughout the course of the study." p 256. |
| Blinding of outcome assessment (detection bias)           | Low risk     | See quote above: blinding of outcome assessors likely done                                                                                                                                                                                                                                                                                                                                          |
| Incomplete outcome data (attrition bias)                  | Unclear risk | No denominators are provided regarding the BPRS outcome. All of the randomized have been considered for calculating relapse rates.                                                                                                                                                                                                                                                                  |
| Selective reporting (reporting bias)                      | High risk    | No protocol available. The BPRS outcome is reported as a mean at study endpoint for patients who did not relapse and relapser among the placebo and fluphenazine group, i.e. three groups different from the two arms of the trial. Although it seems implied, it is not clearly reported if all of the patients were included in this approach of reporting. The PIP scale is missing.             |
| Other bias                                                | Low risk     | Squibb and Sons had a role in providing the active intervention and placebo drugs. No other source of bias detected.                                                                                                                                                                                                                                                                                |
| Overall (CINeMA)                                          | Low risk     |                                                                                                                                                                                                                                                                                                                                                                                                     |

Savitz 2016

| Bias                                                      | Authors' judgement | Support for judgement                                                                                                                                                                                                                                                                                                                                                                |
|-----------------------------------------------------------|--------------------|--------------------------------------------------------------------------------------------------------------------------------------------------------------------------------------------------------------------------------------------------------------------------------------------------------------------------------------------------------------------------------------|
| Random sequence generation (selection bias)               | Low risk           | Quote: "Randomization was performed using a computer-generated randomization scheme administered by an interactive web response system, balanced using permuted blocks across the 2 groups, and stratified by study center".                                                                                                                                                         |
| Allocation concealment (selection bias)                   | Low risk           | See above                                                                                                                                                                                                                                                                                                                                                                            |
| Blinding of participants and personnel (performance bias) | Low risk           | Quote: "[...] patients received active medication every 3 months and, to maintain the blinding, received matched placebo injections (20% intralipid) monthly when they did not receive active medication. All medications (PP3M, PP1M, and placebo) were administered by a study drug administrator who was not involved in any safety or efficacy assessments during the DB phase." |
| Blinding of outcome assessment (detection bias)           | Low risk           | See above                                                                                                                                                                                                                                                                                                                                                                            |
| Incomplete outcome data (attrition bias)                  | Low risk           | Dropouts are about 18% in both arms. A modified ITT approach was employed (quote: "[...] defined as all patients who received at least 1 dose of study drug during the DB phase and had no errors in the delivery of active treatment due to the manufacturing of the investigational product."                                                                                      |
| Selective reporting (reporting bias)                      | Low risk           | Primary and secondary outcomes are clearly described and in line with the protocol of the study (ClinicalTrials.gov Identifier: NCT01515423).                                                                                                                                                                                                                                        |
| Other bias                                                | High risk          | Quote: "This work was supported by Janssen Research & Development, LLC, USA". Also, the funder provided editorial and writing assistance.                                                                                                                                                                                                                                            |
| Overall (CINeMA)                                          | Low risk           |                                                                                                                                                                                                                                                                                                                                                                                      |

Schlosberg 1978

| Bias                                                      | Authors' judgement | Support for judgement                                                                                                                                                         |
|-----------------------------------------------------------|--------------------|-------------------------------------------------------------------------------------------------------------------------------------------------------------------------------|
| Random sequence generation (selection bias)               | Low risk           | Quote: "randomised". Method not reported.                                                                                                                                     |
| Allocation concealment (selection bias)                   | Unclear risk       | Details of allocation concealment not reported.                                                                                                                               |
| Blinding of participants and personnel (performance bias) | Low risk           | Quote: "Double-blind". Patients blinded: "The drugs injected were pipotiazine palmitate, fluphenazine decanoate, and placebo...". Blinding details of personnel not reported. |
| Blinding of outcome assessment (detection bias)           | Unclear risk       | See above.                                                                                                                                                                    |
| Incomplete outcome data (attrition bias)                  | High risk          | Dropout rates were very high: fluphenazine LAI 21/30; piphthiazine LAI 21/30; placebo 13/15. Only analysis for the responders are reported.                                   |
| Selective reporting (reporting bias)                      | High risk          | Protocol not available. Outcomes are incompletely reported. Only analysis for the responders are reported.                                                                    |

|                  |              |                                                                                                                 |
|------------------|--------------|-----------------------------------------------------------------------------------------------------------------|
| Other bias       | Low risk     | Source of funding not reported. Apparently, industry was not involved in the planning and writing of the study. |
| Overall (CINeMA) | Unclear risk |                                                                                                                 |

Schneider 1981

| Bias                                                      | Authors' judgement | Support for judgement                                                                                                                                                                                                             |
|-----------------------------------------------------------|--------------------|-----------------------------------------------------------------------------------------------------------------------------------------------------------------------------------------------------------------------------------|
| Random sequence generation (selection bias)               | Low risk           | Quote: "[...] randomly assigned in a double blind design, to receive either I.M. fluphenazine enanthate or I.M. pipothiazine palmitate".                                                                                          |
| Allocation concealment (selection bias)                   | Unclear risk       | No details provided regarding allocation concealment.                                                                                                                                                                             |
| Blinding of participants and personnel (performance bias) | Low risk           | See above.                                                                                                                                                                                                                        |
| Blinding of outcome assessment (detection bias)           | Unclear risk       | No details provided regarding blinding of outcome assessors.                                                                                                                                                                      |
| Incomplete outcome data (attrition bias)                  | High risk          | Overall dropout rate was 25/59 (42.4%), however no details are provided on the distribution across arms. Apparently, a per protocol approach was employed.                                                                        |
| Selective reporting (reporting bias)                      | Low risk           | No protocol available. Blood chemistry alterations are described as the primary outcome, and are thoroughly reported. Other variables have been collected, but are not reported in detail (no usable data for the meta-analysis). |
| Other bias                                                | Low risk           | Apparently, no support in planning and writing the study came from the industry.                                                                                                                                                  |
| Overall (CINeMA)                                          | Low risk           |                                                                                                                                                                                                                                   |

Schooler 1980

| Bias                                                      | Authors' judgement | Support for judgement                                                                                                                                                                                                                                                                                                                                                                                                                                                                                                                           |
|-----------------------------------------------------------|--------------------|-------------------------------------------------------------------------------------------------------------------------------------------------------------------------------------------------------------------------------------------------------------------------------------------------------------------------------------------------------------------------------------------------------------------------------------------------------------------------------------------------------------------------------------------------|
| Random sequence generation (selection bias)               | Low risk           | The study is described as randomized, however no details on the sequence generation process are provided.                                                                                                                                                                                                                                                                                                                                                                                                                                       |
| Allocation concealment (selection bias)                   | Unclear risk       | No details provided.                                                                                                                                                                                                                                                                                                                                                                                                                                                                                                                            |
| Blinding of participants and personnel (performance bias) | Low risk           | A double-dummy procedure was employed.                                                                                                                                                                                                                                                                                                                                                                                                                                                                                                          |
| Blinding of outcome assessment (detection bias)           | Unclear risk       | No details provided.                                                                                                                                                                                                                                                                                                                                                                                                                                                                                                                            |
| Incomplete outcome data (attrition bias)                  | High risk          | Dropout rates are not clearly reported in the text, however, according to table 2 and 3 they are very high: depot arm 94/143 (65.7%), oral arm 106/147 (72.1%). 76 individuals were randomized and subsequently removed after the "intensive treatment" phase. They were not included in the analysis. No details provided on the management of missings in the analysis, however, according to the number of analyzed patients reported in tables 7 and 10, only completers were included, which is consistent with a "per protocol" analysis. |
| Selective reporting (reporting bias)                      | High risk          | The primary outcome is not clearly pre-specified and no data on adverse events and total scores on rating scales are reported.                                                                                                                                                                                                                                                                                                                                                                                                                  |
| Other bias                                                | Low risk           | The study was supported by a public grant. A pharmaceutical company (Squibb and Sons Inc) only supplied medications.                                                                                                                                                                                                                                                                                                                                                                                                                            |
| Overall (CINeMA)                                          | Unclear risk       |                                                                                                                                                                                                                                                                                                                                                                                                                                                                                                                                                 |

Sharma 1991

| Bias                                        | Authors' judgement | Support for judgement                                                                                                                                                                                     |
|---------------------------------------------|--------------------|-----------------------------------------------------------------------------------------------------------------------------------------------------------------------------------------------------------|
| Random sequence generation (selection bias) | Low risk           | WARNING. The Risk of Bias is reported according to Maayan et al. <i>Cochrane Database of Systematic Reviews</i> 2015, Issue 2. Art. No.: CD000307, and adapted. Quote: "randomised". Method not reported. |

|                                                           |              |                                                                                                                                                                                                                  |
|-----------------------------------------------------------|--------------|------------------------------------------------------------------------------------------------------------------------------------------------------------------------------------------------------------------|
| Allocation concealment (selection bias)                   | Unclear risk | Details of allocation concealment not reported                                                                                                                                                                   |
| Blinding of participants and personnel (performance bias) | Unclear risk | Described as "double-blind". Blinding details not reported.                                                                                                                                                      |
| Blinding of outcome assessment (detection bias)           | Unclear risk | See above.                                                                                                                                                                                                       |
| Incomplete outcome data (attrition bias)                  | High risk    | Losses to follow-up unbalanced in numbers (6/30 fluphenazine vs 10/29 haloperidol) and reasons (treatment failure "primary reason for withdrawal in one patient on fluphenazine and 5 patients on haloperidol"). |
| Selective reporting (reporting bias)                      | Unclear risk | Protocol not available. Some outcomes are incompletely reported.                                                                                                                                                 |
| Other bias                                                | Unclear risk | Source of funding not reported.                                                                                                                                                                                  |
| Overall (CINeMA)                                          | Unclear risk |                                                                                                                                                                                                                  |

*Simon 1978*

| Bias                                                      | Authors' judgement | Support for judgement                                                                                                                                                                     |
|-----------------------------------------------------------|--------------------|-------------------------------------------------------------------------------------------------------------------------------------------------------------------------------------------|
| Random sequence generation (selection bias)               | Low risk           | Quote:"A balanced randomization was prepared placing each patient in one of the following groups [...]" p894. Comment: no details provided regarding the strategy for sequence generation |
| Allocation concealment (selection bias)                   | Unclear risk       | No details provided regarding allocation concealment                                                                                                                                      |
| Blinding of participants and personnel (performance bias) | High risk          | Study is open label                                                                                                                                                                       |
| Blinding of outcome assessment (detection bias)           | Unclear risk       | Study is open label, no mention of blinding of outcome assessors                                                                                                                          |
| Incomplete outcome data (attrition bias)                  | Low risk           | Although with an ad hoc approach, an ITT was performed. Attrition rate are low: SM 6/57 10.5%; PIP 6/55 10.9%, FLU 6/51 11.8%                                                             |
| Selective reporting (reporting bias)                      | Low risk           | All stated outcomes are reported                                                                                                                                                          |
| Other bias                                                | Low risk           | None detected                                                                                                                                                                             |
| Overall (CINeMA)                                          | Low risk           |                                                                                                                                                                                           |

*Singh 1979*

| Bias                                                      | Authors' judgement | Support for judgement                                                                                                                                                                                                                       |
|-----------------------------------------------------------|--------------------|---------------------------------------------------------------------------------------------------------------------------------------------------------------------------------------------------------------------------------------------|
| Random sequence generation (selection bias)               | Low risk           | Quote: "randomised". Method not reported.                                                                                                                                                                                                   |
| Allocation concealment (selection bias)                   | Unclear risk       | Details of allocation concealment not reported.                                                                                                                                                                                             |
| Blinding of participants and personnel (performance bias) | Low risk           | Quote: "double blind". Patients were blinded: "...test medications were administered blind...on alternate two weeks, patients in the pipotiazine group received an injection of sesame oil...". Blinding details of personnel not reported. |
| Blinding of outcome assessment (detection bias)           | Unclear risk       | See above.                                                                                                                                                                                                                                  |
| Incomplete outcome data (attrition bias)                  | Low risk           | All patients completed the study.                                                                                                                                                                                                           |
| Selective reporting (reporting bias)                      | Low risk           | Protocol not available. The main outcomes are clearly reported.                                                                                                                                                                             |
| Other bias                                                | Unclear risk       | Source of funding not reported.                                                                                                                                                                                                             |
| Overall (CINeMA)                                          | Low risk           |                                                                                                                                                                                                                                             |

*Smeraldi 1990*

| Bias | Authors' judgement | Support for judgement |
|------|--------------------|-----------------------|
|      |                    |                       |



|                                                           |              |                                                                                                                                                          |
|-----------------------------------------------------------|--------------|----------------------------------------------------------------------------------------------------------------------------------------------------------|
| Random sequence generation (selection bias)               | Low risk     | Described as randomized. No details provided regarding random sequence generation                                                                        |
| Allocation concealment (selection bias)                   | Unclear risk | No details provided regarding allocation concealment                                                                                                     |
| Blinding of participants and personnel (performance bias) | Low risk     | Trial is described as "double blind". Quote: "The placebo and bromperidol pills were perfectly identical" p 189.                                         |
| Blinding of outcome assessment (detection bias)           | Unclear risk | No details provided regarding blinding of outcome assessors                                                                                              |
| Incomplete outcome data (attrition bias)                  | High risk    | Attrition rates were high, especially for the placebo arm: PBO: 5/10: 50%, BROM: 2/10: 80%. No ITT approach employed, no imputational strategy employed. |
| Selective reporting (reporting bias)                      | Low risk     | No protocol available. Although no outcome was clearly stated to be primary, all of the outcomes are reported. Side effects only summarized.             |
| Other bias                                                | Low risk     | No industry role, no further source of bias detected.                                                                                                    |
| Overall (CINeMA)                                          | Low risk     |                                                                                                                                                          |

*Song 1993*

| Bias                                                      | Authors' judgement | Support for judgement                                                                             |
|-----------------------------------------------------------|--------------------|---------------------------------------------------------------------------------------------------|
| Random sequence generation (selection bias)               | Low risk           | Described as randomized. No details provided regarding generation of random sequence              |
| Allocation concealment (selection bias)                   | Unclear risk       | No details provided regarding allocation concealment                                              |
| Blinding of participants and personnel (performance bias) | Low risk           | Personnel carrying out the trial blinded to allocation, but unclear how participants were blinded |
| Blinding of outcome assessment (detection bias)           | Low risk           | Outcome assessment carried out by external clinicians                                             |
| Incomplete outcome data (attrition bias)                  | Low risk           | Attrition rates were overall below 20%: PIPO: 11/57 19.3%, FLUPH 5/52 9.6%.                       |
| Selective reporting (reporting bias)                      | Low risk           | All the outcomes mentioned in the methods paragraphs are reported in the results                  |
| Other bias                                                | Low risk           | No other source of bias detected                                                                  |
| Overall (CINeMA)                                          | Low risk           |                                                                                                   |

*Steinert 1986*

| Bias                                                      | Authors' judgement | Support for judgement                                                                                                                                                                                                                      |
|-----------------------------------------------------------|--------------------|--------------------------------------------------------------------------------------------------------------------------------------------------------------------------------------------------------------------------------------------|
| Random sequence generation (selection bias)               | Low risk           | Quote: "The patients were randomly assigned to one of the two treatments (blind to patient, nurse and doctor) and medication" p73<br>Comment: no details provided on sequence generation strategy                                          |
| Allocation concealment (selection bias)                   | Unclear risk       | See quote above, no details reported                                                                                                                                                                                                       |
| Blinding of participants and personnel (performance bias) | Low risk           | See quote above. Sesame oil injection were used to preserve masking (the two drugs have different time interval between injections)                                                                                                        |
| Blinding of outcome assessment (detection bias)           | Low risk           | Blinding of outcome assessor is not explicitly mentioned, but considering that at the time of the trial there was not a focus on reporting this information, and the quote above, it seems likely that assessor were blinded to allocation |
| Incomplete outcome data (attrition bias)                  | High risk          | High attrition rate for both arms: PPT 9/14 39%, FPX 7/16 43%.                                                                                                                                                                             |
| Selective reporting (reporting bias)                      | High risk          | Only the BPRS outcome is described in enough detail, whereas all the other outcomes are very poorly reported                                                                                                                               |
| Other bias                                                | Low risk           | No other source of bias found                                                                                                                                                                                                              |
| Overall (CINeMA)                                          | Low risk           |                                                                                                                                                                                                                                            |

*Subotnik 2015*

| Bias | Authors' judgement | Support for judgement |
|------|--------------------|-----------------------|
|------|--------------------|-----------------------|

|                                                           |              |                                                                                                                                                                                                                                                                                                                                                                                       |
|-----------------------------------------------------------|--------------|---------------------------------------------------------------------------------------------------------------------------------------------------------------------------------------------------------------------------------------------------------------------------------------------------------------------------------------------------------------------------------------|
| Random sequence generation (selection bias)               | Low risk     | The study is described as randomized, however no details on the sequence generation process are provided.                                                                                                                                                                                                                                                                             |
| Allocation concealment (selection bias)                   | Unclear risk | No details provided.                                                                                                                                                                                                                                                                                                                                                                  |
| Blinding of participants and personnel (performance bias) | High risk    | Even though this is not clearly specified in the text, no measures for ensuring blinding were employed, which is consistent with an "open-label" approach.                                                                                                                                                                                                                            |
| Blinding of outcome assessment (detection bias)           | High risk    | Quote: "[...] symptom raters were not blinded to treatment condition".                                                                                                                                                                                                                                                                                                                |
| Incomplete outcome data (attrition bias)                  | High risk    | Dropout rates were relatively high: oral risperidone 16/43 (37.2%), long-acting risperidone 13/43 (30.2%). The primary analysis was performed on all randomized patients, according to an ITT approach.                                                                                                                                                                               |
| Selective reporting (reporting bias)                      | Low risk     | The primary and secondary outcomes are clearly pre-specified and reported in the text.                                                                                                                                                                                                                                                                                                |
| Other bias                                                | Low risk     | Quote: "[...] supplementary funding and medication was provided by Janssen Scientific Affairs, LLC. Role of the Funder/Sponsor: The funding sources had no role in the design and conduct of the study; collection, management, analysis, and interpretation of the data; preparation, review, or approval of the manuscript; and decision to submit the manuscript for publication". |
| Overall (CINeMA)                                          | High risk    |                                                                                                                                                                                                                                                                                                                                                                                       |

#### Walker 1983

| Bias                                                      | Authors' judgement | Support for judgement                                                                                                                                                                    |
|-----------------------------------------------------------|--------------------|------------------------------------------------------------------------------------------------------------------------------------------------------------------------------------------|
| Random sequence generation (selection bias)               | Low risk           | Quote: "[...] randomly allocated". No further details provided.                                                                                                                          |
| Allocation concealment (selection bias)                   | Unclear risk       | No details provided.                                                                                                                                                                     |
| Blinding of participants and personnel (performance bias) | Low risk           | The study is described as "double-blind", with no further details.                                                                                                                       |
| Blinding of outcome assessment (detection bias)           | Unclear risk       | Unclear whether the assessor was aware of the allocation of the patient                                                                                                                  |
| Incomplete outcome data (attrition bias)                  | Low risk           | Apparently, all patients included in the double-blind phase, but one (in the clopenthixol arm) were assessed at the end of the trial. A "per protocol" analysis was performed.           |
| Selective reporting (reporting bias)                      | Unclear risk       | Protocol not available. Primary and secondary outcomes are not clearly reported. SD not reported for the following rating scales: CGI, BPRS, Krawiecka, Goldberg & Vaughan Rating Scale. |
| Other bias                                                | High risk          | Source of funding not reported, however an employee of Lundbeck Ltd. is acknowledged for his help and advice.                                                                            |
| Overall (CINeMA)                                          | Unclear risk       |                                                                                                                                                                                          |

#### Wistedt 1984

| Bias                                                      | Authors' judgement | Support for judgement                                                                                                              |
|-----------------------------------------------------------|--------------------|------------------------------------------------------------------------------------------------------------------------------------|
| Random sequence generation (selection bias)               | Low risk           | Quote:"The patients were allocated to the two groups according to a randomization list, one for each hospital" Wistedt 1984 p 805. |
| Allocation concealment (selection bias)                   | Unclear risk       | See quote above: no details are provided regarding the concealment of the randomization list                                       |
| Blinding of participants and personnel (performance bias) | Low risk           | Quote:"Injections were given double blind every four weeks". Comment: both injections were active decanoate drugs.                 |
| Blinding of outcome assessment (detection bias)           | Unclear risk       | No details are provided to ensure there was blinding of assessor for all the outcomes                                              |
| Incomplete outcome data (attrition bias)                  | Low risk           | Low attrition rate for both arms: Haloperidol 4/29 13.8%, Fluphenazine 4/26 15.4%                                                  |
| Selective reporting (reporting bias)                      | High risk          | Not all the outcomes measured are reported in sufficient detail in neither the publications.                                       |

|                  |              |                                                                                                                                                    |
|------------------|--------------|----------------------------------------------------------------------------------------------------------------------------------------------------|
| Other bias       | High risk    | One of the author was a Janssen employee. Role of the company in planning and conducting the study and writing the paper is not clearly discussed. |
| Overall (CINeMA) | Unclear risk |                                                                                                                                                    |

*Wistedt 1991*

| Bias                                                      | Authors' judgement | Support for judgement                                                                                                                                                                                                                                                     |
|-----------------------------------------------------------|--------------------|---------------------------------------------------------------------------------------------------------------------------------------------------------------------------------------------------------------------------------------------------------------------------|
| Random sequence generation (selection bias)               | Low risk           | Quote: "patients were randomly allocated..."                                                                                                                                                                                                                              |
| Allocation concealment (selection bias)                   | Unclear risk       | No details provided                                                                                                                                                                                                                                                       |
| Blinding of participants and personnel (performance bias) | Low risk           | Quote: "As the 2 depot preparations are not quite identical in the appearance, the so-called triple-blind technique was used to keep blindness. The injections were given by a nurse who had access to the code, but was not involved in the assessment of the patients". |
| Blinding of outcome assessment (detection bias)           | Unclear risk       | Unclear whether the assessor was aware of the allocation of the patient                                                                                                                                                                                                   |
| Incomplete outcome data (attrition bias)                  | Low risk           | Dropout rates were realtively low: haloperidol LAI 5/28 (17.8%), zuclopenthixol LAI 3/35 (8.6%). A per protocol analysis was employed, however the number of patients analysed was quite similar to those randomized.                                                     |
| Selective reporting (reporting bias)                      | Low risk           | Protocol not available. Primary and secondary outcomes are implicitly defined and reported.                                                                                                                                                                               |
| Other bias                                                | Low risk           | No details on the funder are provided. Apparently, the study was conducted independently from industry.                                                                                                                                                                   |
| Overall (CINeMA)                                          | Low risk           |                                                                                                                                                                                                                                                                           |

*Woggon 1977*

| Bias                                                      | Authors' judgement | Support for judgement                                                                                                                                                                    |
|-----------------------------------------------------------|--------------------|------------------------------------------------------------------------------------------------------------------------------------------------------------------------------------------|
| Random sequence generation (selection bias)               | Low risk           | The study is described as "randomized".                                                                                                                                                  |
| Allocation concealment (selection bias)                   | Unclear risk       | No details are provided regarding allocation concealment                                                                                                                                 |
| Blinding of participants and personnel (performance bias) | Low risk           | Quote: "The tests were performed double-blind. The dosage of both drugs and the additional medications were prescribed by an investigator who himself did not take part in the ratings". |
| Blinding of outcome assessment (detection bias)           | Unclear risk       | Unclear whether the assessor was aware of the patients' allocation.                                                                                                                      |
| Incomplete outcome data (attrition bias)                  | High risk          | Dropout rates: fluphenazine LAI 9/30 (30%), pipothiazine LAI 9/31 (29%). Apparently, all patients were included in the analyses.                                                         |
| Selective reporting (reporting bias)                      | Unclear risk       | No protocol available. Primary and secondary outcomes are not clearly described. Data for side effects not usable, other outcomes reported.                                              |
| Other bias                                                | Unclear risk       | Source of funding not reported.                                                                                                                                                          |
| Overall (CINeMA)                                          | Unclear risk       |                                                                                                                                                                                          |

*Zisis 1982*

| Bias                                                      | Authors' judgement | Support for judgement                                                                                                                                    |
|-----------------------------------------------------------|--------------------|----------------------------------------------------------------------------------------------------------------------------------------------------------|
| Random sequence generation (selection bias)               | Low risk           | Quote:"Patientes were alloted to the two treatment groups according to a pre-established randomization code" p. 651                                      |
| Allocation concealment (selection bias)                   | Unclear risk       | No details are provided regarding allocation concealment                                                                                                 |
| Blinding of participants and personnel (performance bias) | Low risk           | Quote:"The double-blind medication was administered by a particular nurse and the randomization code was unknown to the evaluating investigators" p. 652 |
| Blinding of outcome assessment (detection bias)           | Low risk           | See quote above                                                                                                                                          |

|                                          |              |                                                                                                                                                                                                                          |
|------------------------------------------|--------------|--------------------------------------------------------------------------------------------------------------------------------------------------------------------------------------------------------------------------|
| Incomplete outcome data (attrition bias) | High risk    | 12 (out of 16) patients from the placebo arm were withdrawn due to "therapeutic failure" (i.e. relapse). For these no outcome measure were apparently collected at the time of withdrawn, with an attrition rate of 75%. |
| Selective reporting (reporting bias)     | Unclear risk | All outcomes are reported in detail. No protocol available.                                                                                                                                                              |
| Other bias                               | High risk    | Janssen Pharmaceutica is credited as an affiliation institute, but its role in planning and conducting the study and writing the paper is not clearly addressed in the paper.                                            |
| Overall (CINeMA)                         | Unclear risk |                                                                                                                                                                                                                          |

*Zuardi 1983*

| Bias                                                      | Authors' judgement | Support for judgement                                                                                                                                                                                                                                                                                                                                                |
|-----------------------------------------------------------|--------------------|----------------------------------------------------------------------------------------------------------------------------------------------------------------------------------------------------------------------------------------------------------------------------------------------------------------------------------------------------------------------|
| Random sequence generation (selection bias)               | Low risk           | Quote: "[...] patients were divided into two groups [...]" and "The assistant-physician had no need to disclose the randomization code to any patient during the study. This way the study was blind both to the assistant and to the valuator-physician". No details about the sequence generation are reported.                                                    |
| Allocation concealment (selection bias)                   | Low risk           | No details reported.                                                                                                                                                                                                                                                                                                                                                 |
| Blinding of participants and personnel (performance bias) | Low risk           | A double-dummy procedure was employed and the randomization code was never disclosed (see above).                                                                                                                                                                                                                                                                    |
| Blinding of outcome assessment (detection bias)           | Unclear risk       | See above.                                                                                                                                                                                                                                                                                                                                                           |
| Incomplete outcome data (attrition bias)                  | Low risk           | The number of dropouts is not reported. Apparently, all patients were included in the analysis.                                                                                                                                                                                                                                                                      |
| Selective reporting (reporting bias)                      | Low risk           | The primary and secondary outcomes were not clearly pre-specified. All relevant outcomes were reported only graphically. This supports an unclear risk for selective reporting. However, some of these data were included in the meta-analysis, as they were provided by the authors of the trial to the review authors of the Cochrane Review Quraishi et al. 1999. |
| Other bias                                                | High risk          | The sponsorship bias cannot be ruled out, as a conflict of interest disclosure is not reported.                                                                                                                                                                                                                                                                      |
| Overall (CINeMA)                                          | Low risk           |                                                                                                                                                                                                                                                                                                                                                                      |

## Supplement G - Primary outcome: relapse

### Treatment codes

|                       |   |
|-----------------------|---|
| Placebo               | A |
| Fluphenazine LAI      | B |
| Flupenthixol LAI      | C |
| Haloperidol LAI       | D |
| Zu(clopendthixol) LAI | E |
| Pipothiazine LAI      | F |
| Bromperidol LAI       | G |
| Olanzapine LAI        | H |
| Risperidone LAI       | I |
| Aripiprazole LAI      | J |
| Paliperidone LAI-1    | K |
| Paliperidone LAI-3    | L |
| Phenothiazines OS     | M |
| Haloperidol OS        | N |
| Aripiprazole OS       | O |
| Olanzapine OS         | P |
| Risperidone OS        | Q |
| Quetiapine OS         | R |
| Paliperidone OS       | S |
| DBP_OS                | T |

### Network map

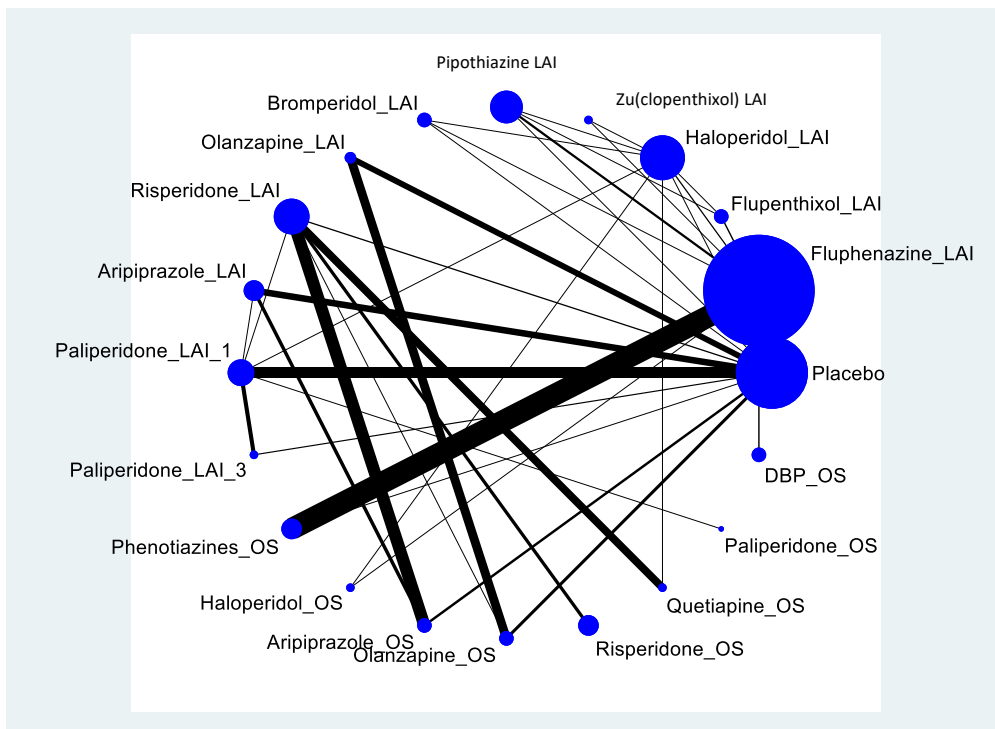

### Pairwise meta-analysis

| Study | ES    | [95% Conf. Interval] |
|-------|-------|----------------------|
| ----- |       |                      |
| Q - I |       |                      |
| 1     | 0.994 | 0.324 3.049          |
| 2     | 0.333 | 0.037 2.991          |
| 3     | 7.000 | 1.692 28.960         |
| 4     | 0.901 | 0.450 1.806          |
| 5     | 0.974 | 0.063 14.998         |

|       |               |       |       |         |
|-------|---------------|-------|-------|---------|
| 58    |               | 0.817 | 0.319 | 2.091   |
|       | Sub-total     |       |       |         |
|       | D+L pooled ES | 1.127 | 0.583 | 2.177   |
| ----- |               |       |       |         |
|       | J - A         |       |       |         |
| 6     |               | 0.375 | 0.225 | 0.626   |
| 39    |               | 0.254 | 0.168 | 0.384   |
|       | Sub-total     |       |       |         |
|       | D+L pooled ES | 0.299 | 0.205 | 0.437   |
| ----- |               |       |       |         |
|       | O - A         |       |       |         |
| 6     |               | 0.357 | 0.212 | 0.601   |
|       | Sub-total     |       |       |         |
|       | D+L pooled ES | 0.357 | 0.212 | 0.601   |
| ----- |               |       |       |         |
|       | O - J         |       |       |         |
| 6     |               | 0.951 | 0.536 | 1.687   |
| 7     |               | 1.004 | 0.503 | 2.006   |
|       | Sub-total     |       |       |         |
|       | D+L pooled ES | 0.972 | 0.625 | 1.512   |
| ----- |               |       |       |         |
|       | H - A         |       |       |         |
| 8     |               | 0.389 | 0.277 | 0.546   |
|       | Sub-total     |       |       |         |
|       | D+L pooled ES | 0.389 | 0.277 | 0.546   |
| ----- |               |       |       |         |
|       | P - A         |       |       |         |
| 8     |               | 0.245 | 0.153 | 0.391   |
|       | Sub-total     |       |       |         |
|       | D+L pooled ES | 0.245 | 0.153 | 0.391   |
| ----- |               |       |       |         |
|       | P - H         |       |       |         |
| 8     |               | 0.629 | 0.400 | 0.990   |
| 9     |               | 0.920 | 0.647 | 1.306   |
|       | Sub-total     |       |       |         |
|       | D+L pooled ES | 0.782 | 0.542 | 1.130   |
| ----- |               |       |       |         |
|       | N - D         |       |       |         |
| 10    |               | 1.000 | 0.170 | 5.888   |
|       | Sub-total     |       |       |         |
|       | D+L pooled ES | 1.000 | 0.170 | 5.888   |
| ----- |               |       |       |         |
|       | M - B         |       |       |         |
| 11    |               | 1.293 | 1.034 | 1.616   |
| 12    |               | 1.232 | 0.225 | 6.759   |
| 13    |               | 1.600 | 1.089 | 2.351   |
| 14    |               | 1.310 | 0.833 | 2.058   |
| 19    |               | 7.500 | 0.438 | 128.401 |
|       | Sub-total     |       |       |         |
|       | D+L pooled ES | 1.363 | 1.143 | 1.626   |
| ----- |               |       |       |         |
|       | B - A         |       |       |         |
| 12    |               | 0.128 | 0.033 | 0.494   |
| 35    |               | 0.333 | 0.041 | 2.686   |
| 37    |               | 0.123 | 0.040 | 0.375   |
| 38    |               | 0.125 | 0.017 | 0.932   |
| 40    |               | 0.423 | 0.044 | 4.063   |
| 41    |               | 0.333 | 0.136 | 0.818   |
| 45    |               | 0.444 | 0.187 | 1.055   |
| 67    |               | 0.143 | 0.022 | 0.910   |
| 76    |               | 0.500 | 0.234 | 1.068   |
|       | Sub-total     |       |       |         |
|       | D+L pooled ES | 0.301 | 0.204 | 0.444   |
| ----- |               |       |       |         |
|       | M - A         |       |       |         |
| 12    |               | 0.157 | 0.052 | 0.475   |
|       | Sub-total     |       |       |         |
|       | D+L pooled ES | 0.157 | 0.052 | 0.475   |
| ----- |               |       |       |         |
|       | N - B         |       |       |         |
| 15    |               | 1.082 | 0.431 | 2.718   |
|       | Sub-total     |       |       |         |
|       | D+L pooled ES | 1.082 | 0.431 | 2.718   |
| ----- |               |       |       |         |
|       | R - D         |       |       |         |
| 16    |               | 2.105 | 0.547 | 8.097   |
|       | Sub-total     |       |       |         |
|       | D+L pooled ES | 2.105 | 0.547 | 8.097   |

|               |  |        |       |         |
|---------------|--|--------|-------|---------|
| -----         |  |        |       |         |
| R - I         |  |        |       |         |
| 17            |  | 1.889  | 1.406 | 2.538   |
| Sub-total     |  |        |       |         |
| D+L pooled ES |  |        |       |         |
|               |  | 1.889  | 1.406 | 2.538   |
| -----         |  |        |       |         |
| O - I         |  |        |       |         |
| 18            |  | 0.942  | 0.744 | 1.192   |
| Sub-total     |  |        |       |         |
| D+L pooled ES |  |        |       |         |
|               |  | 0.942  | 0.744 | 1.192   |
| -----         |  |        |       |         |
| F - C         |  |        |       |         |
| 20            |  | 0.708  | 0.015 | 33.972  |
| Sub-total     |  |        |       |         |
| D+L pooled ES |  |        |       |         |
|               |  | 0.708  | 0.015 | 33.972  |
| -----         |  |        |       |         |
| C - B         |  |        |       |         |
| 21            |  | 1.000  | 0.219 | 4.564   |
| 62            |  | 0.857  | 0.395 | 1.859   |
| Sub-total     |  |        |       |         |
| D+L pooled ES |  |        |       |         |
|               |  | 0.885  | 0.444 | 1.763   |
| -----         |  |        |       |         |
| K - J         |  |        |       |         |
| 23            |  | 1.007  | 0.020 | 50.403  |
| 24            |  | 2.353  | 0.894 | 6.192   |
| Sub-total     |  |        |       |         |
| D+L pooled ES |  |        |       |         |
|               |  | 2.241  | 0.876 | 5.732   |
| -----         |  |        |       |         |
| D - B         |  |        |       |         |
| 25            |  | 0.167  | 0.022 | 1.255   |
| 46            |  | 1.034  | 0.068 | 15.773  |
| 47            |  | 0.909  | 0.020 | 41.676  |
| 55            |  | 0.688  | 0.045 | 10.417  |
| 74            |  | 1.611  | 0.672 | 3.861   |
| Sub-total     |  |        |       |         |
| D+L pooled ES |  |        |       |         |
|               |  | 1.010  | 0.455 | 2.240   |
| -----         |  |        |       |         |
| D - C         |  |        |       |         |
| 26            |  | 1.500  | 0.288 | 7.807   |
| Sub-total     |  |        |       |         |
| D+L pooled ES |  |        |       |         |
|               |  | 1.500  | 0.288 | 7.807   |
| -----         |  |        |       |         |
| G - B         |  |        |       |         |
| 27            |  | 1.043  | 0.393 | 2.770   |
| 56            |  | 1.500  | 0.291 | 7.731   |
| Sub-total     |  |        |       |         |
| D+L pooled ES |  |        |       |         |
|               |  | 1.147  | 0.496 | 2.655   |
| -----         |  |        |       |         |
| K - A         |  |        |       |         |
| 28            |  | 0.368  | 0.264 | 0.511   |
| 54            |  | 0.455  | 0.299 | 0.691   |
| Sub-total     |  |        |       |         |
| D+L pooled ES |  |        |       |         |
|               |  | 0.399  | 0.308 | 0.517   |
| -----         |  |        |       |         |
| I - A         |  |        |       |         |
| 29            |  | 0.349  | 0.170 | 0.718   |
| Sub-total     |  |        |       |         |
| D+L pooled ES |  |        |       |         |
|               |  | 0.349  | 0.170 | 0.718   |
| -----         |  |        |       |         |
| G - A         |  |        |       |         |
| 30            |  | 1.000  | 0.022 | 46.053  |
| Sub-total     |  |        |       |         |
| D+L pooled ES |  |        |       |         |
|               |  | 1.000  | 0.022 | 46.053  |
| -----         |  |        |       |         |
| D - A         |  |        |       |         |
| 31            |  | 25.000 | 1.605 | 389.347 |
| 36            |  | 9.200  | 2.403 | 35.216  |
| Sub-total     |  |        |       |         |
| D+L pooled ES |  |        |       |         |
|               |  | 11.157 | 3.341 | 37.260  |
| -----         |  |        |       |         |
| S - K         |  |        |       |         |
| 32            |  | 1.000  | 0.065 | 15.380  |
| Sub-total     |  |        |       |         |
| D+L pooled ES |  |        |       |         |
|               |  | 1.000  | 0.065 | 15.380  |
| -----         |  |        |       |         |
| F - B         |  |        |       |         |
| 33            |  | 8.224  | 0.453 | 149.154 |
| 51            |  | 1.000  | 0.363 | 2.751   |

|               |  |       |       |        |
|---------------|--|-------|-------|--------|
| 53            |  | 0.467 | 0.089 | 2.454  |
| 64            |  | 0.365 | 0.079 | 1.678  |
| 68            |  | 5.000 | 0.259 | 96.587 |
| 73            |  | 3.000 | 0.350 | 25.678 |
| 76            |  | 0.750 | 0.296 | 1.900  |
| Sub-total     |  |       |       |        |
| D+L pooled ES |  | 0.920 | 0.500 | 1.693  |
| -----         |  |       |       |        |
| L - A         |  |       |       |        |
| 34            |  | 0.141 | 0.066 | 0.303  |
| Sub-total     |  |       |       |        |
| D+L pooled ES |  | 0.141 | 0.066 | 0.303  |
| -----         |  |       |       |        |
| K - I         |  |       |       |        |
| 42            |  | 1.133 | 0.024 | 53.684 |
| Sub-total     |  |       |       |        |
| D+L pooled ES |  | 1.133 | 0.024 | 53.684 |
| -----         |  |       |       |        |
| T - B         |  |       |       |        |
| 43            |  | 1.059 | 0.247 | 4.544  |
| 44            |  | 1.071 | 0.258 | 4.455  |
| 52            |  | 0.800 | 0.238 | 2.692  |
| 61            |  | 1.118 | 0.259 | 4.815  |
| Sub-total     |  |       |       |        |
| D+L pooled ES |  | 0.982 | 0.493 | 1.954  |
| -----         |  |       |       |        |
| P - I         |  |       |       |        |
| 48            |  | 3.000 | 0.129 | 69.515 |
| Sub-total     |  |       |       |        |
| D+L pooled ES |  | 3.000 | 0.129 | 69.515 |
| -----         |  |       |       |        |
| K - D         |  |       |       |        |
| 49            |  | 0.981 | 0.062 | 15.543 |
| Sub-total     |  |       |       |        |
| D+L pooled ES |  | 0.981 | 0.062 | 15.543 |
| -----         |  |       |       |        |
| F - D         |  |       |       |        |
| 50            |  | 2.100 | 0.206 | 21.391 |
| Sub-total     |  |       |       |        |
| D+L pooled ES |  | 2.100 | 0.206 | 21.391 |
| -----         |  |       |       |        |
| G - D         |  |       |       |        |
| 57            |  | 3.000 | 0.372 | 24.171 |
| Sub-total     |  |       |       |        |
| D+L pooled ES |  | 3.000 | 0.372 | 24.171 |
| -----         |  |       |       |        |
| L - K         |  |       |       |        |
| 59            |  | 0.843 | 0.561 | 1.266  |
| Sub-total     |  |       |       |        |
| D+L pooled ES |  | 0.843 | 0.561 | 1.266  |
| -----         |  |       |       |        |
| E - D         |  |       |       |        |
| 63            |  | 1.067 | 0.260 | 4.378  |
| Sub-total     |  |       |       |        |
| D+L pooled ES |  | 1.067 | 0.260 | 4.378  |
| -----         |  |       |       |        |
| F - A         |  |       |       |        |
| 76            |  | 0.375 | 0.159 | 0.884  |
| Sub-total     |  |       |       |        |
| D+L pooled ES |  | 0.375 | 0.159 | 0.884  |
| -----         |  |       |       |        |
| E - B         |  |       |       |        |
| 77            |  | 0.702 | 0.131 | 3.748  |
| Sub-total     |  |       |       |        |
| D+L pooled ES |  | 0.702 | 0.131 | 3.748  |
| -----         |  |       |       |        |

Test(s) of heterogeneity:

|       | Heterogeneity<br>statistic | degrees of<br>freedom | P     | I-squared** | Tau-squared |
|-------|----------------------------|-----------------------|-------|-------------|-------------|
| Q - I | 8.38                       | 5                     | 0.137 | 40.3%       | 0.2517      |
| J - A | 1.35                       | 1                     | 0.246 | 25.7%       | 0.0196      |
| O - A | 0.00                       | 0                     | .     | .%          | 0.0000      |
| O - J | 0.01                       | 1                     | 0.905 | 0.0%        | 0.0000      |
| H - A | 0.00                       | 0                     | .     | .%          | 0.0000      |
| P - A | 0.00                       | 0                     | .     | .%          | 0.0000      |
| P - H | 1.68                       | 1                     | 0.194 | 40.6%       | 0.0293      |



|       |      |   |       |       |        |
|-------|------|---|-------|-------|--------|
| N - D | 0.00 | 0 | .     | .%    | 0.0000 |
| M - B | 2.31 | 4 | 0.679 | 0.0%  | 0.0000 |
| B - A | 8.02 | 8 | 0.432 | 0.2%  | 0.0008 |
| M - A | 0.00 | 0 | .     | .%    | 0.0000 |
| N - B | 0.00 | 0 | .     | .%    | 0.0000 |
| R - D | 0.00 | 0 | .     | .%    | 0.0000 |
| R - I | 0.00 | 0 | .     | .%    | 0.0000 |
| O - I | 0.00 | 0 | .     | .%    | 0.0000 |
| F - C | 0.00 | 0 | .     | .%    | 0.0000 |
| C - B | 0.03 | 1 | 0.859 | 0.0%  | 0.0000 |
| K - J | 0.17 | 1 | 0.680 | 0.0%  | 0.0000 |
| D - B | 4.21 | 4 | 0.378 | 5.0%  | 0.0583 |
| D - C | 0.00 | 0 | .     | .%    | 0.0000 |
| G - B | 0.14 | 1 | 0.709 | 0.0%  | 0.0000 |
| K - A | 0.61 | 1 | 0.434 | 0.0%  | 0.0000 |
| I - A | 0.00 | 0 | .     | .%    | 0.0000 |
| G - A | 0.00 | 0 | .     | .%    | 0.0000 |
| D - A | 0.41 | 1 | 0.521 | 0.0%  | 0.0000 |
| S - K | 0.00 | 0 | .     | .%    | 0.0000 |
| F - B | 6.87 | 6 | 0.333 | 12.7% | 0.0878 |
| L - A | 0.00 | 0 | .     | .%    | 0.0000 |
| K - I | 0.00 | 0 | .     | .%    | 0.0000 |
| T - B | 0.16 | 3 | 0.983 | 0.0%  | 0.0000 |
| P - I | 0.00 | 0 | .     | .%    | 0.0000 |
| K - D | 0.00 | 0 | .     | .%    | 0.0000 |
| F - D | 0.00 | 0 | .     | .%    | 0.0000 |
| G - D | 0.00 | 0 | .     | .%    | 0.0000 |
| L - K | 0.00 | 0 | .     | .%    | 0.0000 |
| E - D | 0.00 | 0 | .     | .%    | 0.0000 |
| F - A | 0.00 | 0 | .     | .%    | 0.0000 |
| E - B | 0.00 | 0 | .     | .%    | 0.0000 |

\*\* I-squared: the variation in ES attributable to heterogeneity)

### Net league table

|                          |                         |                         |                          |                         |                         |                            |                            |                          |                          |                              |                         |                           |                         |                         |                         |                         |                         |                              |                         |
|--------------------------|-------------------------|-------------------------|--------------------------|-------------------------|-------------------------|----------------------------|----------------------------|--------------------------|--------------------------|------------------------------|-------------------------|---------------------------|-------------------------|-------------------------|-------------------------|-------------------------|-------------------------|------------------------------|-------------------------|
| Aripip<br>razole<br>_LAI | 1.74<br>(0.72,<br>4.22) | 1.11<br>(0.51,<br>2.41) | 1.20<br>(0.76,<br>1.89)  | 1.98<br>(1.08,<br>3.64) | 1.30<br>(0.82,<br>2.06) | 1.35<br>(0.93,1<br>.97)    | 0.94<br>(0.55,1<br>.60)    | 1.22<br>(0.65,<br>2.32)  | 1.21<br>(0.78,<br>1.85)  | 1.44<br>(0.44,4.<br>74)      | 3.50<br>(2.59,<br>4.74) | 1.60<br>(0.98,<br>2.60)   | 1.42<br>(0.56,<br>3.63) | 1.12<br>(0.76,<br>1.65) | 1.04<br>(0.63,<br>1.73) | 1.28<br>(0.68,<br>2.41) | 2.35<br>(1.38,<br>4.01) | 1.35<br>(0.09,<br>21.40<br>) | 1.18<br>(0.52,<br>2.70) |
| 0.57<br>(0.24,<br>1.39)  | Brom<br>perid<br>ol_LAI | 0.64<br>(0.24,<br>1.73) | 0.69<br>(0.32,<br>1.49)  | 1.14<br>(0.47,<br>2.74) | 0.74<br>(0.30,<br>1.84) | 0.78<br>(0.33,1<br>.85)    | 0.54<br>(0.21,1<br>.40)    | 0.70<br>(0.28,<br>1.77)  | 0.69<br>(0.28,<br>1.73)  | 0.83<br>(0.21,3.<br>18)      | 2.01<br>(0.87,<br>4.62) | 0.92<br>(0.41,<br>2.03)   | 0.82<br>(0.26,<br>2.52) | 0.64<br>(0.26,<br>1.59) | 0.60<br>(0.23,<br>1.52) | 0.74<br>(0.26,<br>2.05) | 1.35<br>(0.52,<br>3.51) | 0.78<br>(0.04,<br>13.70<br>) | 0.68<br>(0.24,<br>1.91) |
| 0.90<br>(0.41,<br>1.95)  | 1.57<br>(0.58,<br>4.25) | Flupe<br>nthixo<br>_LAI | 1.08<br>(0.57,<br>2.05)  | 1.78<br>(0.83,<br>3.81) | 1.17<br>(0.53,<br>2.59) | 1.22<br>(0.57,2<br>.60)    | 0.84<br>(0.36,1<br>.97)    | 1.10<br>(0.49,<br>2.47)  | 1.09<br>(0.48,<br>2.44)  | 1.30<br>(0.36,4.<br>64)      | 3.15<br>(1.54,<br>6.45) | 1.44<br>(0.74,<br>2.80)   | 1.28<br>(0.45,<br>3.62) | 1.01<br>(0.45,<br>2.24) | 0.93<br>(0.41,<br>2.14) | 1.15<br>(0.45,<br>2.93) | 2.12<br>(0.90,<br>5.00) | 1.22<br>(0.07,<br>20.80<br>) | 1.06<br>(0.41,<br>2.72) |
| 0.83<br>(0.53,<br>1.31)  | 1.45<br>(0.67,<br>3.14) | 0.93<br>(0.49,<br>1.75) | Fluph<br>enazin<br>e_LAI | 1.65<br>(1.01,<br>2.71) | 1.08<br>(0.66,<br>1.76) | 1.13<br>(0.74,1<br>.72)    | 0.78<br>(0.44,1<br>.38)    | 1.02<br>(0.61,<br>1.70)  | 1.01<br>(0.60,<br>1.68)  | 1.20<br>(0.39,3.<br>69)      | 2.92<br>(2.07,<br>4.11) | 1.33<br>(1.10,<br>1.62)   | 1.18<br>(0.52,<br>2.72) | 0.93<br>(0.57,<br>1.53) | 0.87<br>(0.51,<br>1.48) | 1.07<br>(0.53,<br>2.14) | 1.96<br>(1.08,<br>3.55) | 1.13<br>(0.07,<br>17.95<br>) | 0.98<br>(0.49,<br>1.96) |
| 0.51<br>(0.28,<br>0.93)  | 0.88<br>(0.37,<br>2.12) | 0.56<br>(0.39,<br>1.20) | 0.61<br>(0.37,<br>0.99)  | Halop<br>eridol<br>_LAI | 0.66<br>(0.35,<br>1.24) | 0.68<br>(0.38,1<br>.23)    | 0.47<br>(0.24,0<br>.95)    | 0.62<br>(0.31,<br>1.22)  | 0.61<br>(0.32,<br>1.15)  | 0.73<br>(0.24,2.<br>19)      | 1.77<br>(1.03,<br>3.03) | 0.81<br>(0.48,<br>1.37)   | 0.72<br>(0.29,<br>1.79) | 0.57<br>(0.30,<br>1.06) | 0.52<br>(0.27,<br>1.03) | 0.65<br>(0.30,<br>1.42) | 1.19<br>(0.60,<br>2.36) | 0.68<br>(0.04,<br>11.22<br>) | 0.60<br>(0.25,<br>1.39) |
| 0.77<br>(0.49,<br>1.22)  | 1.34<br>(0.54,<br>3.32) | 0.86<br>(0.39,<br>1.90) | 0.92<br>(0.57,<br>1.51)  | 1.53<br>(0.80,<br>2.89) | Olanz<br>apine<br>_LAI  | 1.04<br>(0.68,1<br>.61)    | 0.72<br>(0.41,1<br>.27)    | 0.94<br>(0.49,<br>1.84)  | 0.93<br>(0.55,<br>1.58)  | 1.11<br>(0.33,3.<br>71)      | 2.70<br>(1.90,<br>3.83) | 1.23<br>(0.73,<br>2.07)   | 1.10<br>(0.42,<br>2.85) | 0.86<br>(0.52,<br>1.43) | 0.80<br>(0.59,<br>1.08) | 0.99<br>(0.49,<br>2.00) | 1.81<br>(0.98,<br>3.37) | 1.04<br>(0.07,<br>16.62<br>) | 0.91<br>(0.39,<br>2.12) |
| 0.74<br>(0.51,<br>1.08)  | 1.29<br>(0.54,<br>3.07) | 0.82<br>(0.39,<br>1.75) | 0.89<br>(0.58,<br>1.36)  | 1.46<br>(0.81,<br>2.64) | 0.96<br>(0.62,<br>1.48) | Paliper<br>idone_<br>LAI_1 | 0.69<br>(0.46,1<br>.05)    | 0.91<br>(0.49,<br>1.68)  | 0.89<br>(0.56,<br>1.42)  | 1.07<br>(0.33,3.<br>47)      | 2.59<br>(2.01,<br>3.34) | 1.18<br>(0.75,<br>1.87)   | 1.05<br>(0.42,<br>2.65) | 0.83<br>(0.53,<br>1.29) | 0.77<br>(0.47,<br>1.25) | 0.95<br>(0.49,<br>1.83) | 1.74<br>(1.00,<br>3.04) | 1.00<br>(0.06,<br>15.43<br>) | 0.87<br>(0.39,<br>1.96) |
| 1.07<br>(0.63,<br>1.81)  | 1.86<br>(0.71,<br>4.83) | 1.18<br>(0.51,<br>2.77) | 1.28<br>(0.73,<br>2.25)  | 2.11<br>(1.05,<br>4.24) | 1.38<br>(0.79,<br>2.43) | 1.44<br>(0.95,2<br>.19)    | Paliper<br>idone_<br>LAI_3 | 1.31<br>(0.63,<br>2.70)  | 1.29<br>(0.70,<br>2.36)  | 1.54<br>(0.45,5.<br>29)      | 3.73<br>(2.38,<br>5.85) | 1.70<br>(0.94,<br>3.09)   | 1.52<br>(0.94,<br>4.12) | 1.19<br>(0.62,<br>2.12) | 1.11<br>(0.62,<br>1.99) | 1.37<br>(0.95,<br>2.95) | 2.51<br>(1.25,<br>5.05) | 1.44<br>(0.09,<br>22.94<br>) | 1.26<br>(0.51,<br>3.07) |
| 0.82<br>(0.43,<br>1.55)  | 1.42<br>(0.57,<br>3.57) | 0.91<br>(0.41,<br>2.03) | 0.98<br>(0.59,<br>1.63)  | 1.62<br>(0.82,<br>3.19) | 1.06<br>(0.54,<br>2.06) | 1.10<br>(0.59,2<br>.05)    | 0.77<br>(0.37,1<br>.58)    | Pipot<br>hiazin<br>e_LAI | 0.98<br>(0.50,<br>1.95)  | 1.18<br>(0.35,4.<br>00)      | 2.86<br>(1.62,<br>5.03) | 1.30<br>(0.76,<br>2.25)   | 1.16<br>(0.44,<br>3.06) | 0.91<br>(0.47,<br>1.79) | 0.85<br>(0.42,<br>1.71) | 1.05<br>(0.46,<br>2.39) | 1.92<br>(0.91,<br>4.05) | 1.10<br>(0.07,<br>18.24<br>) | 0.96<br>(0.41,<br>2.27) |
| 0.83<br>(0.54,<br>1.27)  | 1.44<br>(0.58,<br>3.61) | 0.92<br>(0.41,<br>2.07) | 0.99<br>(0.59,<br>1.67)  | 1.64<br>(0.87,<br>3.10) | 1.08<br>(0.63,<br>1.83) | 1.12<br>(0.70,1<br>.79)    | 0.78<br>(0.42,1<br>.43)    | 1.02<br>(0.51,<br>2.01)  | Risper<br>idone_<br>_LAI | 1.19<br>(0.36,4.<br>00)      | 2.90<br>(1.94,<br>4.34) | 1.32<br>(0.77,<br>2.28)   | 1.18<br>(0.45,<br>3.10) | 0.93<br>(0.72,<br>1.20) | 0.86<br>(0.49,<br>1.53) | 1.06<br>(0.67,<br>1.69) | 1.95<br>(1.41,<br>2.70) | 1.12<br>(0.07,<br>17.99<br>) | 0.98<br>(0.41,<br>2.32) |
| 0.69<br>(0.21,<br>2.28)  | 1.21<br>(0.31,<br>4.65) | 0.77<br>(0.22,<br>2.76) | 0.83<br>(0.27,<br>2.56)  | 1.37<br>(0.46,<br>4.14) | 0.90<br>(0.27,<br>3.01) | 0.94<br>(0.29,3<br>.05)    | 0.65<br>(0.19,2<br>.24)    | 0.85<br>(0.25,<br>2.89)  | 0.84<br>(0.25,<br>2.80)  | (Zu)clo<br>penthix<br>ol_LAI | 2.43<br>(0.77,<br>7.71) | 1.11<br>(0.36,<br>3.46)   | 0.99<br>(0.25,<br>3.90) | 0.78<br>(0.23,<br>2.59) | 0.72<br>(0.21,<br>2.45) | 0.89<br>(0.24,<br>3.25) | 1.63<br>(0.47,<br>5.65) | 0.94<br>(0.05,<br>18.47<br>) | 0.82<br>(0.22,<br>3.06) |
| 0.29<br>(0.21,<br>0.39)  | 0.50<br>(0.22,<br>1.15) | 0.32<br>(0.16,<br>0.65) | 0.34<br>(0.24,<br>0.48)  | 0.57<br>(0.33,<br>0.97) | 0.37<br>(0.26,<br>0.53) | 0.39<br>(0.30,0<br>.50)    | 0.27<br>(0.17,0<br>.42)    | 0.35<br>(0.20,<br>0.62)  | 0.34<br>(0.23,<br>0.52)  | 0.41<br>(0.13,1.<br>31)      | Place<br>bo             | 0.46<br>(0.31,<br>0.67)   | 0.41<br>(0.17,<br>0.99) | 0.32<br>(0.22,<br>0.46) | 0.30<br>(0.20,<br>0.45) | 0.37<br>(0.20,<br>0.68) | 0.67<br>(0.40,<br>1.12) | 0.39<br>(0.02,<br>6.03)      | 0.34<br>(0.16,<br>0.73) |
| 0.63<br>(0.38,<br>1.02)  | 1.09<br>(0.49,<br>2.42) | 0.70<br>(0.36,<br>1.36) | 0.75<br>(0.62,<br>0.91)  | 1.24<br>(0.73,<br>2.10) | 0.81<br>(0.48,<br>1.37) | 0.85<br>(0.53,1<br>.34)    | 0.59<br>(0.32,1<br>.06)    | 0.77<br>(0.44,<br>1.32)  | 0.76<br>(0.44,<br>1.30)  | 0.90<br>(0.29,2.<br>81)      | 2.19<br>(1.49,<br>3.22) | Pheno<br>tizazine<br>s_OS | 0.89<br>(0.38,<br>2.09) | 0.70<br>(0.41,<br>1.19) | 0.65<br>(0.37,<br>1.14) | 0.80<br>(0.39,<br>1.64) | 1.47<br>(0.79,<br>2.74) | 0.85<br>(0.05,<br>13.56<br>) | 0.74<br>(0.36,<br>1.51) |
| 0.70<br>(0.28,<br>1.80)  | 1.23<br>(0.40,<br>3.78) | 0.78<br>(0.28,<br>2.21) | 0.84<br>(0.37,<br>1.94)  | 1.39<br>(0.56,<br>3.46) | 0.91<br>(0.35,<br>2.38) | 0.95<br>(0.38,2<br>.39)    | 0.66<br>(0.24,1<br>.79)    | 0.86<br>(0.33,<br>2.27)  | 0.85<br>(0.32,<br>2.23)  | 1.01<br>(0.26,4.<br>00)      | 2.46<br>(1.01,<br>6.00) | 1.12<br>(0.48,<br>2.64)   | Halop<br>eridol<br>_OS  | 0.79<br>(0.30,<br>2.05) | 0.73<br>(0.27,<br>1.95) | 0.90<br>(0.31,<br>2.63) | 1.65<br>(0.60,<br>4.53) | 0.95<br>(0.05,<br>17.07<br>) | 0.83<br>(0.28,<br>2.44) |

|                              |                              |                              |                          |                              |                              |                          |                          |                              |                              |                          |                              |                              |                              |                              |                              |                              |                              |                              |                              |
|------------------------------|------------------------------|------------------------------|--------------------------|------------------------------|------------------------------|--------------------------|--------------------------|------------------------------|------------------------------|--------------------------|------------------------------|------------------------------|------------------------------|------------------------------|------------------------------|------------------------------|------------------------------|------------------------------|------------------------------|
| 0.89<br>(0.61,<br>1.32)      | 1.56<br>(0.63,<br>3.86)      | 0.99<br>(0.45,<br>2.21)      | 1.07<br>(0.65,<br>1.77)  | 1.77<br>(0.94,<br>3.32)      | 1.16<br>(0.70,<br>1.93)      | 1.21<br>(0.77,1<br>.89)  | 0.84<br>(0.47,1<br>.49)  | 1.09<br>(0.56,<br>2.15)      | 1.08<br>(0.83,<br>1.40)      | 1.29<br>(0.39,4.<br>29)  | 3.13<br>(2.15,<br>4.55)      | 1.43<br>(0.84,<br>2.42)      | 1.27<br>(0.49,<br>3.31)      | Aripip<br>razole<br>_OS      | 0.93<br>(0.54,<br>1.61)      | 1.15<br>(0.67,<br>1.95)      | 2.10<br>(1.38,<br>3.21)      | 1.21<br>(0.08,<br>19.33<br>) | 1.05<br>(0.45,<br>2.47)      |
| 0.96<br>(0.58,<br>1.60)      | 1.68<br>(0.66,<br>4.27)      | 1.07<br>(0.47,<br>2.45)      | 1.16<br>(0.68,<br>1.97)  | 1.91<br>(0.97,<br>3.74)      | 1.25<br>(0.93,<br>1.68)      | 1.30<br>(0.80,2<br>.11)  | 0.90<br>(0.50,1<br>.62)  | 1.18<br>(0.59,<br>2.38)      | 1.16<br>(0.65,<br>2.06)      | 1.39<br>(0.41,4.<br>72)  | 3.37<br>(2.24,<br>5.08)      | 1.54<br>(0.87,<br>2.70)      | 1.37<br>(0.51,<br>3.65)      | 1.08<br>(0.62,<br>1.86)      | Olanz<br>apine<br>_OS        | 1.23<br>(0.59,<br>2.59)      | 2.27<br>(1.17,<br>4.40)      | 1.30<br>(0.08,<br>20.95<br>) | 1.13<br>(0.47,<br>2.72)      |
| 0.78<br>(0.41,<br>1.47)      | 1.36<br>(0.49,<br>3.78)      | 0.87<br>(0.34,<br>2.20)      | 0.94<br>(0.47,<br>1.87)  | 1.54<br>(0.70,<br>3.39)      | 1.01<br>(0.50,<br>2.05)      | 1.05<br>(0.55,2<br>.03)  | 0.73<br>(0.34,1<br>.58)  | 0.96<br>(0.42,<br>2.18)      | 0.94<br>(0.59,<br>1.49)      | 1.12<br>(0.31,4.<br>10)  | 2.73<br>(1.48,<br>5.04)      | 1.25<br>(0.61,<br>2.55)      | 1.11<br>(0.38,<br>3.24)      | 0.87<br>(0.51,<br>1.49)      | 0.81<br>(0.39,<br>1.70)      | Risper<br>idone<br>_OS       | 1.84<br>(1.05,<br>3.21)      | 1.05<br>(0.06,<br>17.58<br>) | 0.92<br>(0.35,<br>2.45)      |
| 0.42<br>(0.25,<br>0.72)      | 0.74<br>(0.28,<br>1.93)      | 0.47<br>(0.20,<br>1.11)      | 0.51<br>(0.28,<br>0.92)  | 0.84<br>(0.42,<br>1.67)      | 0.55<br>(0.30,<br>1.02)      | 0.57<br>(0.33,1<br>.00)  | 0.40<br>(0.20,0<br>.80)  | 0.52<br>(0.25,<br>1.10)      | 0.51<br>(0.37,<br>0.71)      | 0.61<br>(0.18,2.<br>12)  | 1.49<br>(0.90,<br>2.47)      | 0.68<br>(0.37,<br>1.26)      | 0.60<br>(0.22,<br>1.65)      | 0.48<br>(0.31,<br>0.72)      | 0.44<br>(0.23,<br>0.86)      | 0.54<br>(0.31,<br>0.95)      | Queti<br>apine<br>_OS        | 0.57<br>(0.04,<br>9.37)      | 0.50<br>(0.20,<br>1.25)      |
| 0.74<br>(0.05,<br>11.71<br>) | 1.29<br>(0.07,<br>22.75<br>) | 0.82<br>(0.05,<br>14.06<br>) | 0.89<br>(0.06,<br>14.15) | 1.46<br>(0.09,<br>24.05<br>) | 0.96<br>(0.06,<br>15.32<br>) | 1.00<br>(0.06,1<br>5.43) | 0.69<br>(0.04,1<br>1.05) | 0.91<br>(0.05,<br>14.98<br>) | 0.89<br>(0.06,<br>14.32<br>) | 1.07<br>(0.05,2<br>0.98) | 2.59<br>(0.17,<br>40.42<br>) | 1.18<br>(0.07,<br>18.94<br>) | 1.05<br>(0.06,<br>18.89<br>) | 0.83<br>(0.05,<br>13.23<br>) | 0.77<br>(0.05,<br>12.37<br>) | 0.95<br>(0.06,<br>15.82<br>) | 1.74<br>(0.11,<br>28.42<br>) | 0.87<br>(0.05,<br>15.13<br>) | 0.87<br>(0.05,<br>15.13<br>) |
| 0.85<br>(0.37,<br>1.94)      | 1.48<br>(0.52,<br>4.17)      | 0.94<br>(0.37,<br>2.42)      | 1.02<br>(0.51,<br>2.03)  | 1.68<br>(0.72,<br>3.93)      | 1.10<br>(0.47,<br>2.57)      | 1.15<br>(0.51,2<br>.58)  | 0.80<br>(0.33,1<br>.94)  | 1.04<br>(0.44,<br>2.45)      | 1.02<br>(0.43,<br>2.42)      | 1.22<br>(0.33,4.<br>56)  | 2.97<br>(1.37,<br>6.43)      | 1.35<br>(0.66,<br>2.78)      | 1.21<br>(0.41,<br>3.56)      | 0.95<br>(0.40,<br>2.23)      | 0.88<br>(0.37,<br>2.11)      | 1.09<br>(0.41,<br>2.90)      | 2.00<br>(0.80,<br>4.97)      | 1.15<br>(0.07,<br>19.90<br>) | DBP_<br>OS                   |

Net league table: head-to-head comparisons. Relative risks (RRs) and 95% confidence intervals (CIs) are reported. RRs lower than 1 favour the column-defining treatment. Statistically significant results are highlighted in grey. LAI=long-acting antipsychotics

### Evaluation of heterogeneity and incoherence

#### Overall heterogeneity

Estimated between-studies SD: .0661036

#### Overall incoherence

Design-by-treatment test: P = 0.453

#### Loop-specific approach

- \* 21 triangular loops found
- \* 3 quadratic loops found

Note: Heterogeneity of loop A-D-F cannot be estimated due to insufficient observations - set equal to 0  
 Note: Heterogeneity of loop A-D-G cannot be estimated due to insufficient observations - set equal to 0  
 Note: Heterogeneity of loop A-H-P cannot be estimated due to insufficient observations - set equal to 0  
 Note: Heterogeneity of loop A-I-K cannot be estimated due to insufficient observations - set equal to 0  
 Note: Heterogeneity of loop A-I-O cannot be estimated due to insufficient observations - set equal to 0  
 Note: Heterogeneity of loop A-I-P cannot be estimated due to insufficient observations - set equal to 0  
 Note: Heterogeneity of loop A-J-O cannot be estimated due to insufficient observations - set equal to 0  
 Note: Heterogeneity of loop A-K-L cannot be estimated due to insufficient observations - set equal to 0  
 Note: Heterogeneity of loop C-D-F cannot be estimated due to insufficient observations - set equal to 0  
 Note: Heterogeneity of loop A-D-I-R cannot be estimated due to insufficient observations - set equal to 0  
 Note: Heterogeneity of loop D-I-K-R cannot be estimated due to insufficient observations - set equal to 0

Evaluation of inconsistency using loop-specific heterogeneity estimates:

| Loop    | ROR    | z_value | p_value | CI_95          | Loop_Heterog_tau2 |
|---------|--------|---------|---------|----------------|-------------------|
| A-D-F   | 62.478 | 2.944   | 0.003   | (3.98,980.01)  | 0.000             |
| A-D-I-R | 35.582 | 3.557   | 0.000   | (4.97,254.69)  | 0.000             |
| A-B-D   | 34.579 | 4.755   | 0.000   | (8.03,148.98)  | 0.000             |
| A-D-G   | 33.470 | 1.521   | 0.128   | (1.00,3089.02) | 0.000             |
| A-D-K   | 27.444 | 2.146   | 0.032   | (1.33,565.57)  | 0.000             |
| C-D-F   | 4.447  | 0.609   | 0.543   | (1.00,543.07)  | 0.000             |
| A-I-P   | 4.281  | 0.875   | 0.382   | (1.00,111.32)  | 0.000             |
| A-B-G   | 2.897  | 0.529   | 0.597   | (1.00,148.91)  | 0.000             |
| A-B-M   | 2.818  | 1.704   | 0.088   | (1.00,9.28)    | 0.000             |
| B-D-G   | 2.804  | 0.855   | 0.393   | (1.00,29.80)   | 0.000             |
| A-K-L   | 2.384  | 1.886   | 0.059   | (1.00,5.88)    | 0.000             |
| B-D-F   | 2.266  | 0.615   | 0.539   | (1.00,30.75)   | 0.080             |
| I-J-K-O | 1.915  | 0.318   | 0.750   | (1.00,104.75)  | 0.000             |
| A-B-F   | 1.665  | 0.898   | 0.369   | (1.00,5.06)    | 0.000             |
| A-J-K   | 1.664  | 0.972   | 0.331   | (1.00,4.64)    | 0.000             |
| B-D-E   | 1.535  | 0.346   | 0.729   | (1.00,17.36)   | 0.058             |

|  |         |       |       |       |               |  |       |  |
|--|---------|-------|-------|-------|---------------|--|-------|--|
|  | A-H-P   | 1.462 | 1.099 | 0.272 | (1.00,2.88)   |  | 0.000 |  |
|  | B-C-F   | 1.430 | 0.177 | 0.860 | (1.00,75.68)  |  | 0.000 |  |
|  | D-I-K-R | 1.288 | 0.100 | 0.920 | (1.00,180.27) |  | 0.000 |  |
|  | B-C-D   | 1.238 | 0.217 | 0.829 | (1.00,8.53)   |  | 0.000 |  |
|  | A-J-O   | 1.199 | 0.385 | 0.700 | (1.00,3.02)   |  | 0.000 |  |
|  | A-I-O   | 1.084 | 0.171 | 0.864 | (1.00,2.72)   |  | 0.000 |  |
|  | B-D-N   | 1.072 | 0.061 | 0.952 | (1.00,10.20)  |  | 0.058 |  |
|  | A-I-K   | 1.007 | 0.003 | 0.997 | (1.00,51.41)  |  | 0.000 |  |

Consistency between direct and indirect estimates

| Side  | Direct<br>Coef. | Std. Err. | Indirect<br>Coef. | Std. Err. | Difference<br>Coef. | Std. Err. | P> z  |
|-------|-----------------|-----------|-------------------|-----------|---------------------|-----------|-------|
| A B   | -1.302397       | .2085646  | -.0781746         | .467297   | -1.224222           | .5333786  | 0.022 |
| A D   | 2.412044        | .6152606  | -1.296328         | .3036415  | 3.708372            | .6861077  | 0.000 |
| A F   | -.8955038       | .4354568  | -1.162145         | .3751997  | .2666411            | .5637971  | 0.636 |
| A G   | 1.37e-10        | 1.955159  | -.7323252         | .4356085  | .7323252            | 2.003098  | 0.715 |
| A H   | -.9411271       | .1729056  | -1.536832         | .5446163  | .5957049            | .5652758  | 0.292 |
| A I   | -1.051352       | .3880762  | -1.068561         | .2725293  | .0172096            | .4742102  | 0.971 |
| A J   | -1.207921       | .1897704  | -1.435167         | .3759277  | .2272465            | .4243239  | 0.592 |
| A K   | -.9161484       | .144513   | -1.135581         | .3368776  | .2194327            | .3614458  | 0.544 |
| A L   | -1.959192       | .3897856  | -1.054122         | .2431796  | -.9050701           | .4594226  | 0.049 |
| A M   | -1.985488       | .5328399  | -.5918196         | .2075202  | -1.393668           | .5777743  | 0.016 |
| A O   | -1.005914       | .2860251  | -1.268874         | .2734272  | .2629599            | .3912183  | 0.501 |
| A P   | -1.412684       | .2388381  | -.5896256         | .4667082  | -.823058            | .5638714  | 0.144 |
| B C   | -.1216655       | .357366   | .155526           | .8098896  | -.2771916           | .8852104  | 0.754 |
| B D   | .0589586        | .3808337  | .8678771          | .3447855  | -.8089185           | .515876   | 0.117 |
| B E   | -.3541809       | .8576282  | .6141304          | .7687811  | -.9683113           | 1.151757  | 0.401 |
| B F   | -.1076075       | .2782237  | .7516277          | .6333765  | -.8592352           | .6785964  | 0.205 |
| B G   | .1381599        | .4304993  | 1.534177          | .9593469  | -1.396017           | 1.051504  | 0.184 |
| B M * | .3097304        | .0898763  | -2.142524         | .9720713  | 2.452254            | .977973   | 0.012 |
| B N   | .0791686        | .4757987  | .5278995          | .9444179  | -.4487309           | 1.057502  | 0.671 |
| B T * | -.0179938       | .3526913  | 2.146149          | 68.83413  | -2.164143           | 68.835    | 0.975 |
| C D   | .4054782        | .8451152  | .6232467          | .4389563  | -.2177685           | .9523136  | 0.819 |
| C F   | -.3448407       | 1.975903  | .1171529          | .4202427  | -.4619937           | 2.020098  | 0.819 |
| D E   | .0645432        | .7237907  | -.9036145         | .8959235  | .9681576            | 1.151762  | 0.401 |
| D F   | .7419523        | 1.186036  | -.5949932         | .3634522  | 1.336946            | 1.240475  | 0.281 |
| D G   | 1.098659        | 1.066197  | -.3902095         | .4926104  | 1.488868            | 1.174501  | 0.205 |
| D K   | -.0192932       | 1.411402  | -.3987161         | .3081948  | .3794229            | 1.444659  | 0.793 |
| D N   | 1.83e-10        | .9076921  | -.4486247         | .5426454  | .4486247            | 1.05753   | 0.671 |
| D R   | .7444666        | .6910401  | -.0183615         | .4014646  | .7628281            | .7991928  | 0.340 |
| H P * | -.2323917       | .1570458  | 2.35533           | 3.26199   | -2.587722           | 3.270568  | 0.429 |
| I K   | .1251633        | 1.96959   | .1137154          | .2415116  | .0114479            | 1.984342  | 0.995 |
| I O   | -.0600587       | .1777933  | -.2074132         | .4161314  | .1473544            | .4525215  | 0.745 |
| I P   | 1.098646        | 1.605567  | -.1952121         | .3105764  | 1.293858            | 1.63533   | 0.429 |
| I Q * | .0610814        | .2354253  | 2.369477          | 69.53775  | -2.308396           | 69.5382   | 0.974 |
| I R   | .6359892        | .16695    | 1.39881           | .7814813  | -.7628212           | .7991158  | 0.340 |
| J K   | .8056177        | .4852968  | .2042264          | .2194108  | .6013913            | .5319168  | 0.258 |
| J O   | -.029609        | .2274195  | .5033336          | .3763568  | -.5329427           | .4388878  | 0.225 |
| K L   | -1.708379       | .2073171  | -1.075896         | .4099859  | .9050576            | .4594222  | 0.049 |
| K S * | -1.43e-09       | 1.395994  | 1.903183          | 373.7651  | -1.903183           | 373.7677  | 0.996 |

\* Warning: all the evidence about these contrasts comes from the trials which directly compare them. See help file for more information.

SUCRA and cumulative probability plots

| Treatment           | SUCRA | PrBest | MeanRank |
|---------------------|-------|--------|----------|
| Placebo             | 2.5   | 0.0    | 19.5     |
| Fluphenazine_LAI    | 60.9  | 0.2    | 8.4      |
| Flupenthixol_LAI    | 65.4  | 9.6    | 7.6      |
| Haloperidol_LAI     | 21.1  | 0.0    | 16.0     |
| (Zu)clopendthix_LAI | 45.9  | 8.4    | 11.3     |
| Pipothiazine_LAI    | 57.5  | 3.1    | 9.1      |
| Bromperidol_LAI     | 32.8  | 1.7    | 13.8     |
| Olanzapine_LAI      | 50.9  | 0.1    | 10.3     |
| Risperidone_LAI     | 58.9  | 0.7    | 8.8      |
| Aripiprazole_LAI    | 78.0  | 5.2    | 5.2      |
| Paliperidone_LAI_1  | 46.8  | 0.0    | 11.1     |
| Paliperidone_LAI_3  | 80.2  | 14.6   | 4.8      |
| Phenotiazines_OS    | 32.6  | 0.0    | 13.8     |
| Haloperidol_OS      | 47.0  | 5.3    | 11.1     |
| Aripiprazole_OS     | 67.2  | 1.4    | 7.2      |
| Olanzapine_OS       | 73.2  | 6.7    | 6.1      |
| Risperidone_OS      | 53.5  | 2.8    | 9.8      |

|                 |      |      |      |
|-----------------|------|------|------|
| Quetiapine_OS   | 13.9 | 0.0  | 17.4 |
| Paliperidone_OS | 50.6 | 32.0 | 10.4 |
| DBP_OS          | 60.8 | 8.4  | 8.4  |

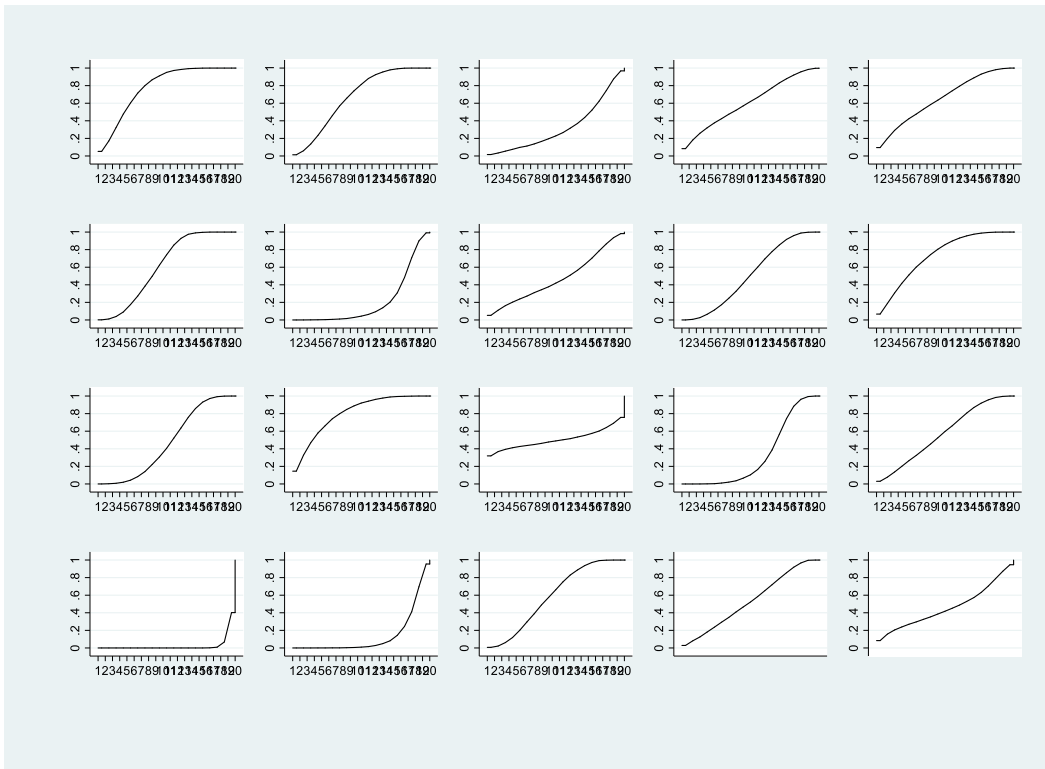

**Funnel plot**

Not applicable: no comparisons with 10 or more studies.

**GRADE appraisal (CINeMA)**

The analysis of the certainty of the evidence was performed with the online application CINeMA, which follows the principles of the GRADE methodology. The following criteria were applied:

- Within-study bias: the "overall" risk of bias of each study was calculated as follows: (a) LOW risk if four or more domains of the Cochrane RoB were at low risk (even if three were at high risk); (b) HIGH risk if three or more domains were at high risk; (c) UNCLEAR RISK in all other cases. For each comparison, the histogram was interpreted according to a "Majority risk of bias" rule;
- Across-studies bias was considered "undetected" when was not possible to evaluate the risk of publication bias;
- Indirectness: the histogram was interpreted according to a "Majority risk of bias" rule;
- Imprecision: risk ratio between 0.667 to 1.5 was considered as a clinically important size of effect;
- Heterogeneity: risk ratio between 0.667 to 1.5 was considered as a clinically important size of effect;
- Incoherence: for all the comparisons for which only a direct or indirect estimation was available (Inconsistency measures: Not applicable) we reported "some concern".

**Within-study bias**

The bar chart shows the contributions of each piece of study to the network estimate. Green=low risk; Yellow=unclear risk; Red=high risk

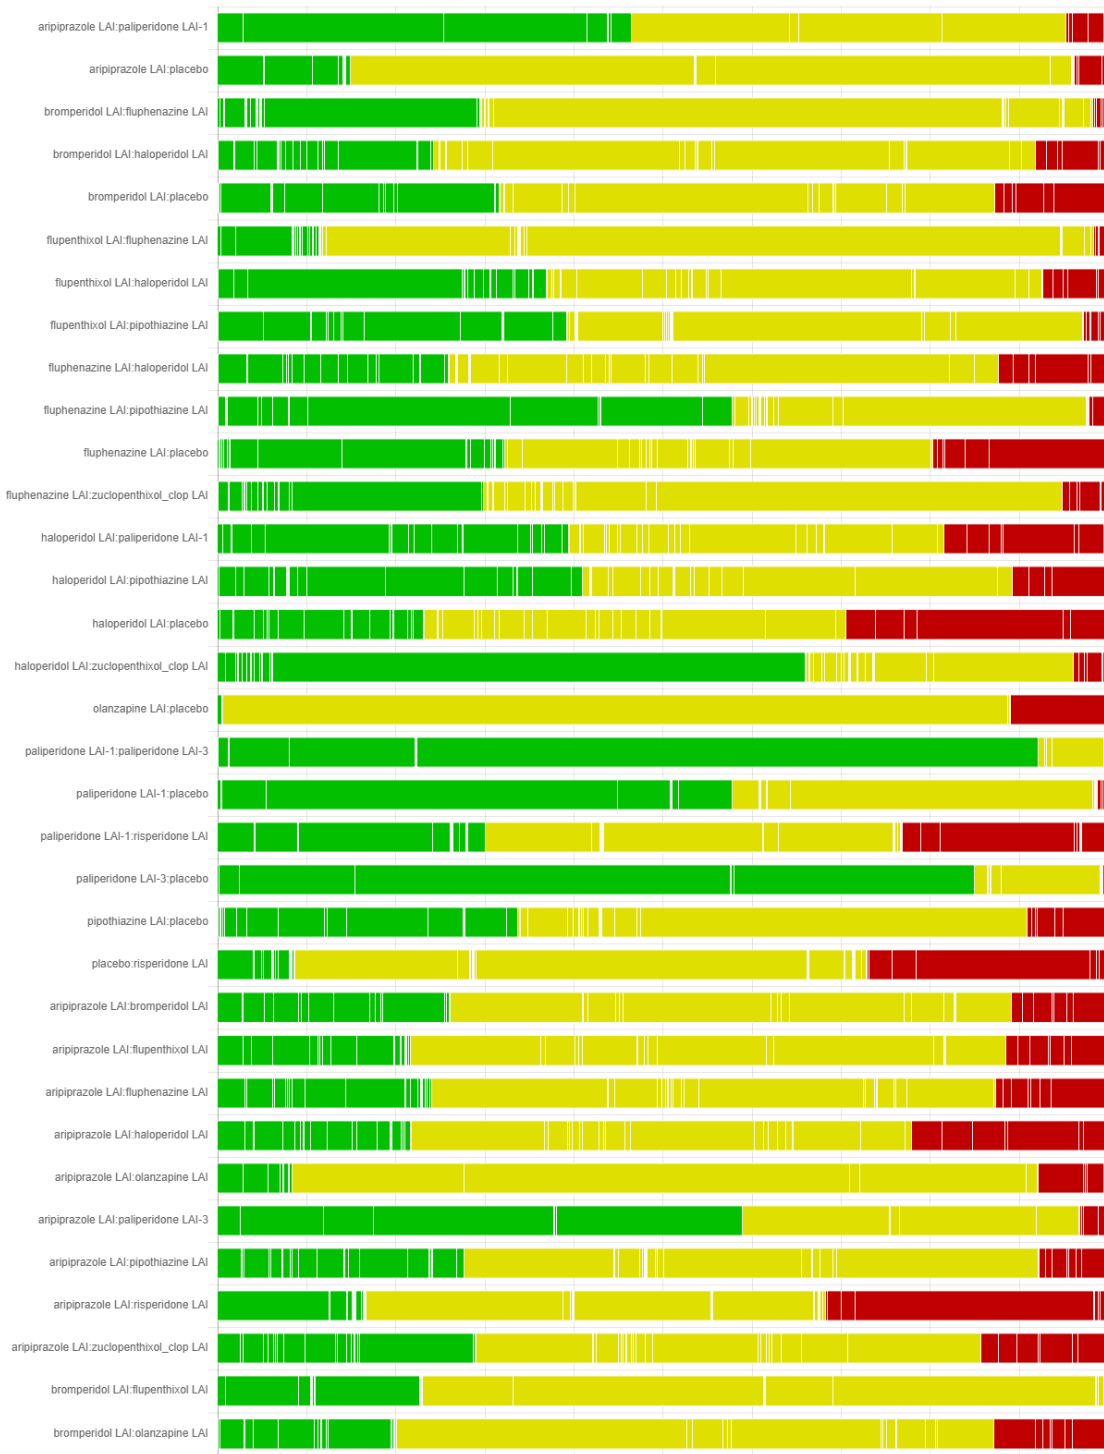

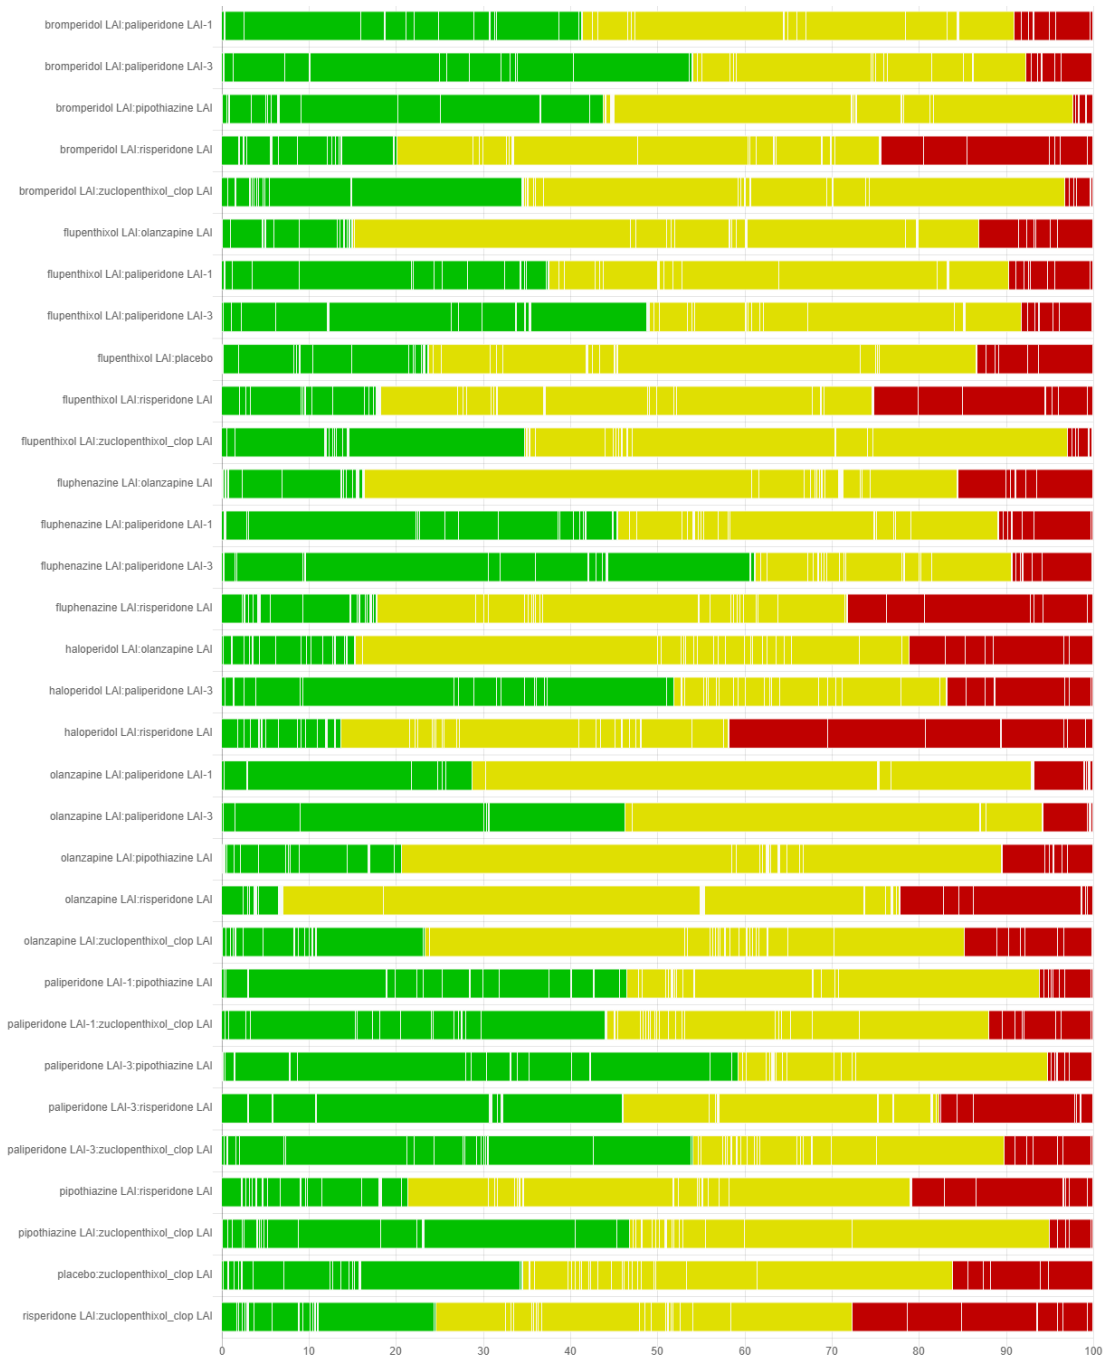

Indirectness

The bar chart shows the contributions of each study to the network estimate. Green=low risk; Yellow=unclear risk; Red=high risk

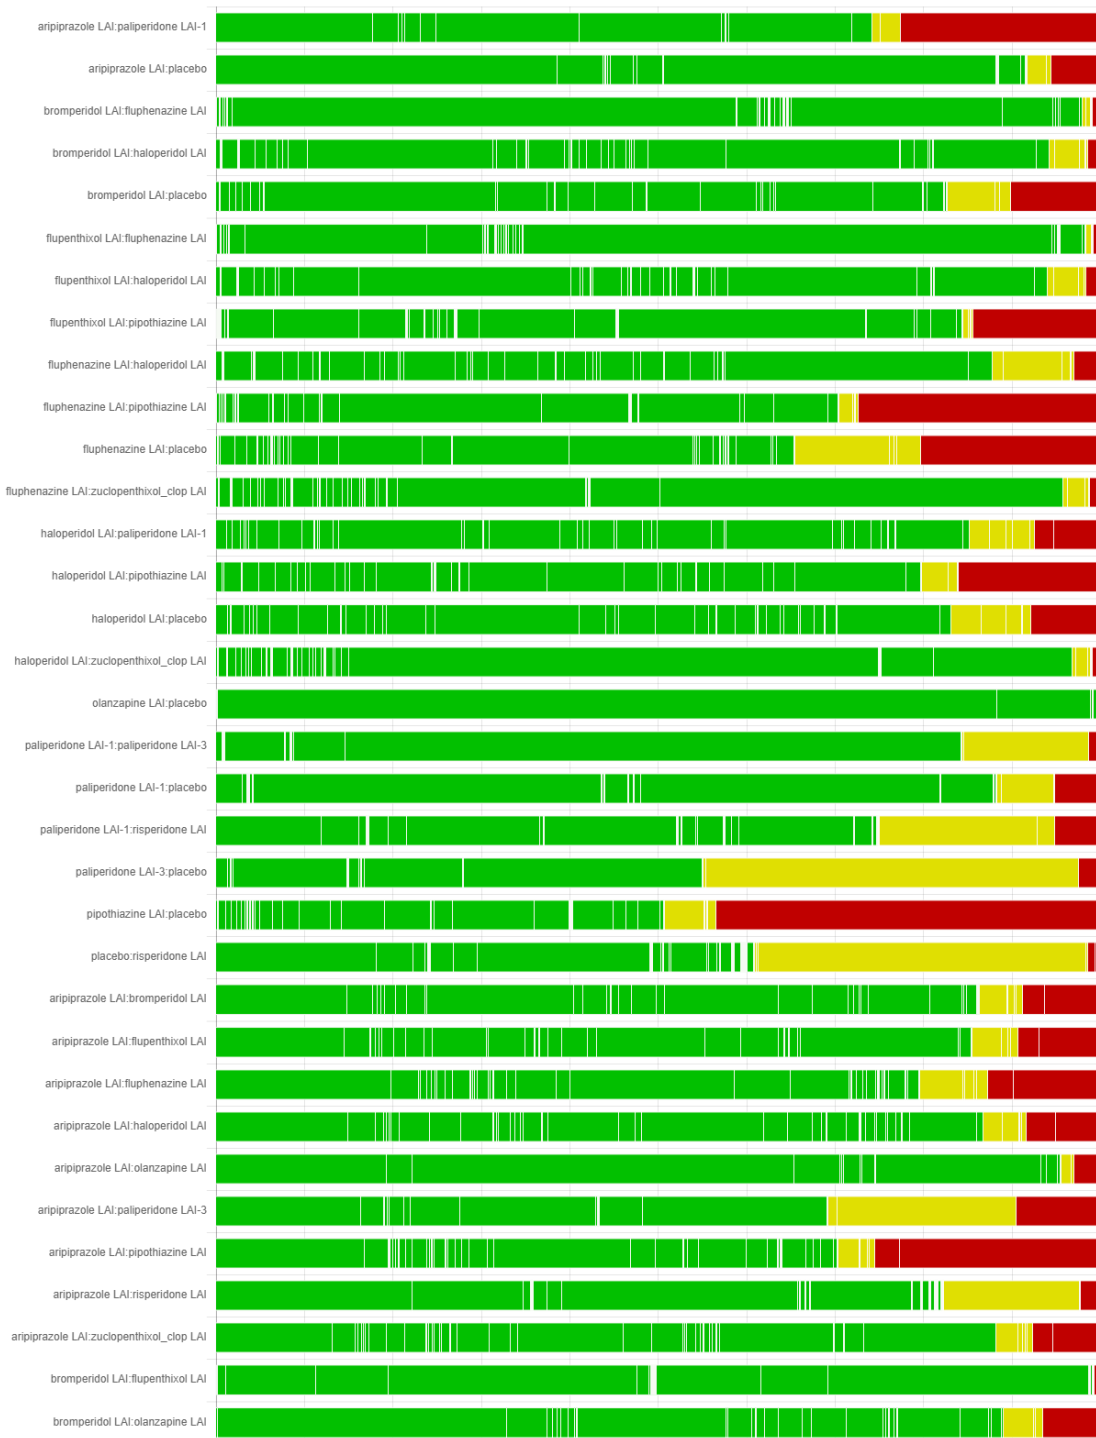

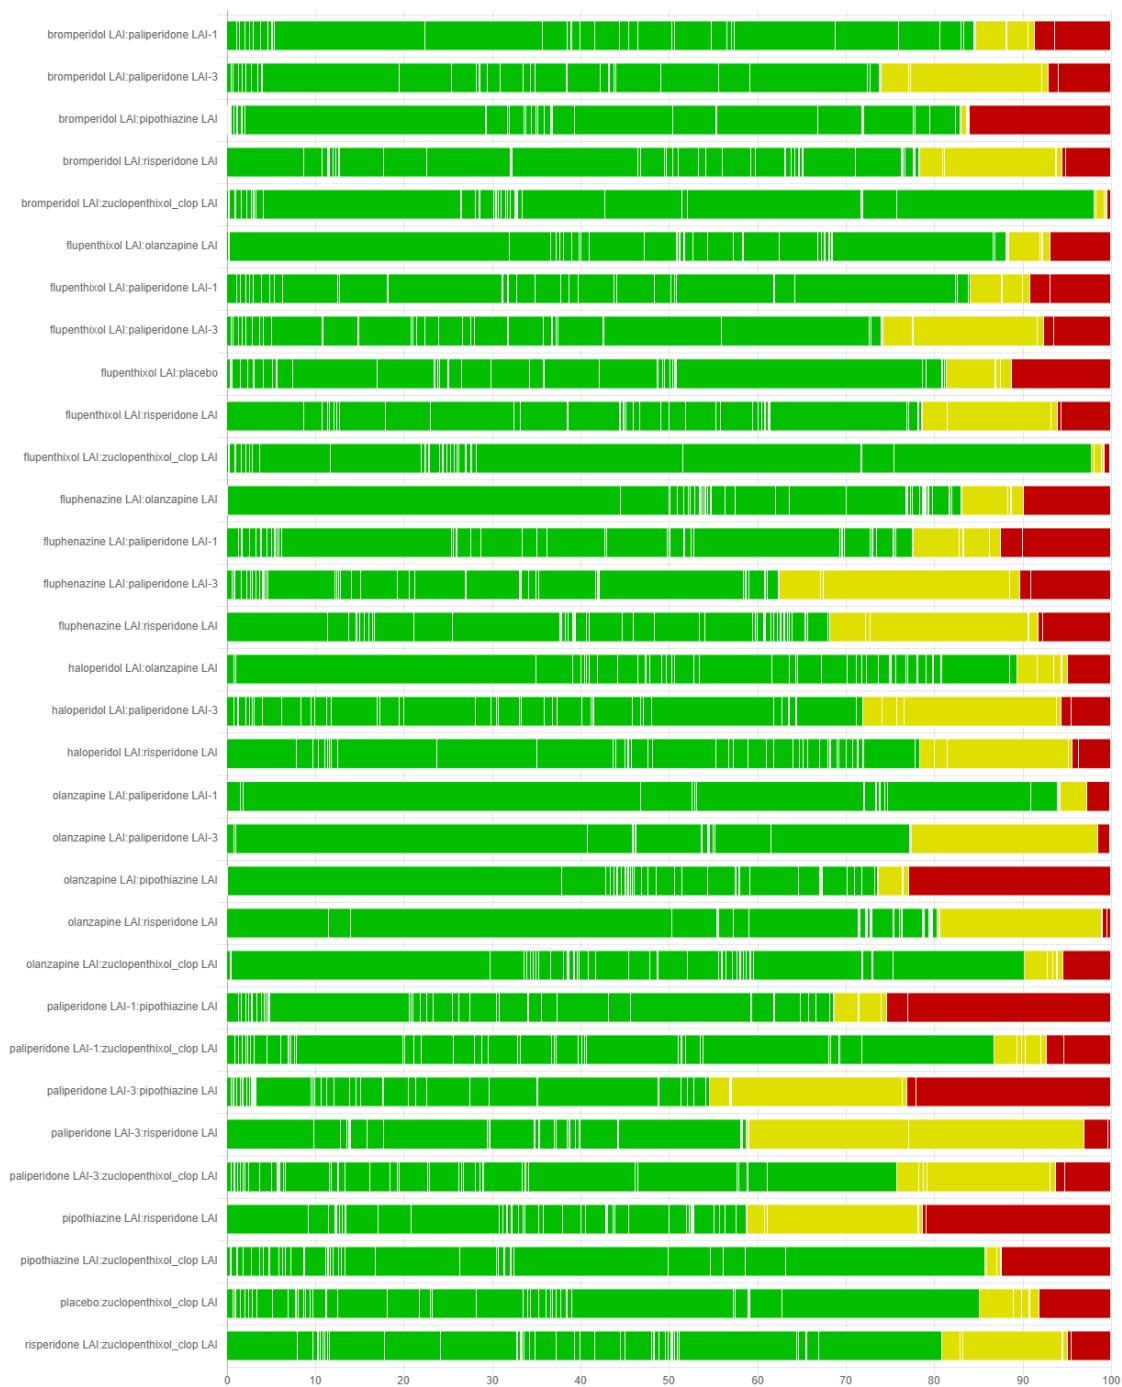

Final report

| Comparison                                | Number of studies | Within-study bias | Reporting bias | Indirectness | Imprecision    | Heterogeneity | Incoherence    | Confidence rating |
|-------------------------------------------|-------------------|-------------------|----------------|--------------|----------------|---------------|----------------|-------------------|
| aripiprazole LAI:paliperidone LAI-1       | 2                 | Some concerns     | Undetected     | No concerns  | Some concerns  | Some concerns | No concerns    | Very low          |
| aripiprazole LAI:placebo                  | 2                 | Some concerns     | Undetected     | No concerns  | No concerns    | No concerns   | No concerns    | Moderate          |
| bromperidol LAI:fluphenazine LAI          | 2                 | Some concerns     | Undetected     | No concerns  | Major concerns | No concerns   | No concerns    | Very low          |
| bromperidol LAI:haloperidol LAI           | 1                 | Some concerns     | Undetected     | No concerns  | Major concerns | No concerns   | No concerns    | Very low          |
| bromperidol LAI:placebo                   | 1                 | Some concerns     | Undetected     | No concerns  | Some concerns  | Some concerns | No concerns    | Very low          |
| flupenthixol LAI:fluphenazine LAI         | 2                 | Some concerns     | Undetected     | No concerns  | Major concerns | No concerns   | No concerns    | Very low          |
| flupenthixol LAI:haloperidol LAI          | 1                 | Some concerns     | Undetected     | No concerns  | Some concerns  | Some concerns | No concerns    | Very low          |
| flupenthixol LAI:pipothiazine LAI         | 1                 | Some concerns     | Undetected     | No concerns  | Major concerns | No concerns   | No concerns    | Very low          |
| fluphenazine LAI:haloperidol LAI          | 5                 | Some concerns     | Undetected     | No concerns  | Some concerns  | No concerns   | No concerns    | Low               |
| fluphenazine LAI:pipothiazine LAI         | 7                 | No concerns       | Undetected     | No concerns  | Major concerns | No concerns   | No concerns    | Low               |
| fluphenazine LAI:placebo                  | 9                 | Some concerns     | Undetected     | No concerns  | No concerns    | No concerns   | Some concerns  | Low               |
| fluphenazine LAI:zuclopenthixol_clopi LAI | 1                 | Some concerns     | Undetected     | No concerns  | Major concerns | No concerns   | No concerns    | Very low          |
| haloperidol LAI:paliperidone LAI-1        | 1                 | Some concerns     | Undetected     | No concerns  | Some concerns  | Some concerns | No concerns    | Very low          |
| haloperidol LAI:pipothiazine LAI          | 1                 | Some concerns     | Undetected     | No concerns  | Some concerns  | Some concerns | No concerns    | Very low          |
| haloperidol LAI:placebo                   | 2                 | Some concerns     | Undetected     | No concerns  | Some concerns  | No concerns   | Major concerns | Very low          |
| haloperidol LAI:zuclopenthixol_clopi LAI  | 1                 | No concerns       | Undetected     | No concerns  | Major concerns | No concerns   | No concerns    | Low               |
| olanzapine LAI:placebo                    | 1                 | Some concerns     | Undetected     | No concerns  | No concerns    | No concerns   | No concerns    | Moderate          |





## Supplement H - Sensitivity analysis: relapse (excluding trials in which clinicians and participants were not blind to treatment allocation)

### Treatment codes

|                      |   |
|----------------------|---|
| Placebo              | A |
| Fluphenazine LAI     | B |
| Flupenthixol LAI     | C |
| Haloperidol LAI      | D |
| (Zu)clopenthixol LAI | E |
| Pipothiazine LAI     | F |
| Bromperidol LAI      | G |
| Olanzapine LAI       | H |
| Risperidone LAI      | I |
| Aripiprazole LAI     | J |
| Paliperidone LAI-1   | K |
| Paliperidone LAI-3   | L |
| Phenothiazines OS    | M |
| Haloperidol OS       | N |
| Aripiprazole OS      | O |
| Olanzapine OS        | P |
| Risperidone OS       | Q |
| DBP_OS               | R |

### Network map

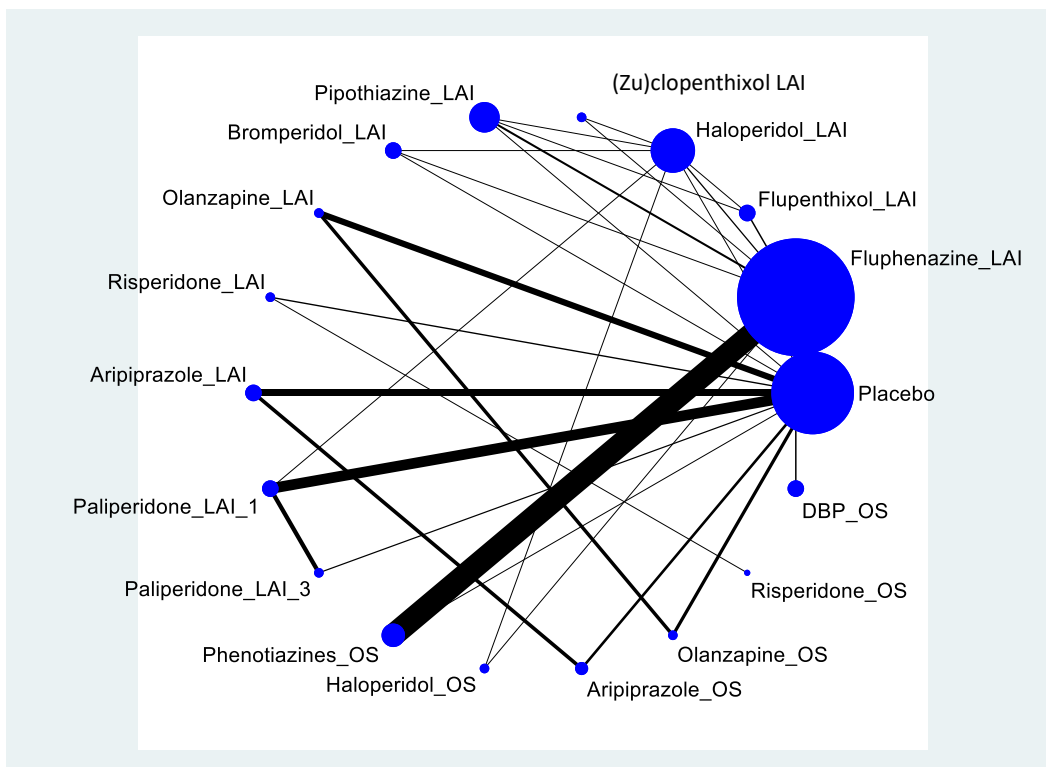

### Pairwise meta-analysis

| Study         | ES    | [95% Conf. Interval] |       |
|---------------|-------|----------------------|-------|
| -----         |       |                      |       |
| Q - I         |       |                      |       |
| 1             | 0.994 | 0.324                | 3.049 |
| Sub-total     |       |                      |       |
| D+L pooled ES | 0.994 | 0.324                | 3.049 |
| -----         |       |                      |       |

|               |       |       |         |
|---------------|-------|-------|---------|
| J - A         |       |       |         |
| 6             | 0.375 | 0.225 | 0.626   |
| 39            | 0.254 | 0.168 | 0.384   |
| Sub-total     |       |       |         |
| D+L pooled ES | 0.299 | 0.205 | 0.437   |
| -----         |       |       |         |
| O - A         |       |       |         |
| 6             | 0.357 | 0.212 | 0.601   |
| Sub-total     |       |       |         |
| D+L pooled ES | 0.357 | 0.212 | 0.601   |
| -----         |       |       |         |
| O - J         |       |       |         |
| 6             | 0.951 | 0.536 | 1.687   |
| 7             | 1.004 | 0.503 | 2.006   |
| Sub-total     |       |       |         |
| D+L pooled ES | 0.972 | 0.625 | 1.512   |
| -----         |       |       |         |
| H - A         |       |       |         |
| 8             | 0.389 | 0.277 | 0.546   |
| Sub-total     |       |       |         |
| D+L pooled ES | 0.389 | 0.277 | 0.546   |
| -----         |       |       |         |
| P - A         |       |       |         |
| 8             | 0.245 | 0.153 | 0.391   |
| Sub-total     |       |       |         |
| D+L pooled ES | 0.245 | 0.153 | 0.391   |
| -----         |       |       |         |
| P - H         |       |       |         |
| 8             | 0.629 | 0.400 | 0.990   |
| Sub-total     |       |       |         |
| D+L pooled ES | 0.629 | 0.400 | 0.990   |
| -----         |       |       |         |
| N - D         |       |       |         |
| 10            | 1.000 | 0.170 | 5.888   |
| Sub-total     |       |       |         |
| D+L pooled ES | 1.000 | 0.170 | 5.888   |
| -----         |       |       |         |
| M - B         |       |       |         |
| 11            | 1.293 | 1.034 | 1.616   |
| 12            | 1.232 | 0.225 | 6.759   |
| 13            | 1.600 | 1.089 | 2.351   |
| 14            | 1.310 | 0.833 | 2.058   |
| 19            | 7.500 | 0.438 | 128.401 |
| Sub-total     |       |       |         |
| D+L pooled ES | 1.363 | 1.143 | 1.626   |
| -----         |       |       |         |
| B - A         |       |       |         |
| 12            | 0.128 | 0.033 | 0.494   |
| 35            | 0.333 | 0.041 | 2.686   |
| 37            | 0.123 | 0.040 | 0.375   |
| 38            | 0.125 | 0.017 | 0.932   |
| 40            | 0.423 | 0.044 | 4.063   |
| 41            | 0.333 | 0.136 | 0.818   |
| 45            | 0.444 | 0.187 | 1.055   |
| 67            | 0.143 | 0.022 | 0.910   |
| 76            | 0.500 | 0.234 | 1.068   |
| Sub-total     |       |       |         |
| D+L pooled ES | 0.301 | 0.204 | 0.444   |
| -----         |       |       |         |
| M - A         |       |       |         |
| 12            | 0.157 | 0.052 | 0.475   |
| Sub-total     |       |       |         |
| D+L pooled ES | 0.157 | 0.052 | 0.475   |
| -----         |       |       |         |
| N - B         |       |       |         |
| 15            | 1.082 | 0.431 | 2.718   |
| Sub-total     |       |       |         |
| D+L pooled ES | 1.082 | 0.431 | 2.718   |
| -----         |       |       |         |
| F - C         |       |       |         |
| 20            | 0.708 | 0.015 | 33.972  |
| Sub-total     |       |       |         |
| D+L pooled ES | 0.708 | 0.015 | 33.972  |
| -----         |       |       |         |
| C - B         |       |       |         |
| 21            | 1.000 | 0.219 | 4.564   |
| 62            | 0.857 | 0.395 | 1.859   |
| Sub-total     |       |       |         |

|               |        |       |         |
|---------------|--------|-------|---------|
| D+L pooled ES | 0.885  | 0.444 | 1.763   |
| -----         |        |       |         |
| D - B         |        |       |         |
| 25            | 0.167  | 0.022 | 1.255   |
| 46            | 1.034  | 0.068 | 15.773  |
| 55            | 0.688  | 0.045 | 10.417  |
| 74            | 1.611  | 0.672 | 3.861   |
| Sub-total     |        |       |         |
| D+L pooled ES | 0.843  | 0.287 | 2.478   |
| -----         |        |       |         |
| D - C         |        |       |         |
| 26            | 1.500  | 0.288 | 7.807   |
| Sub-total     |        |       |         |
| D+L pooled ES | 1.500  | 0.288 | 7.807   |
| -----         |        |       |         |
| G - B         |        |       |         |
| 27            | 1.043  | 0.393 | 2.770   |
| 56            | 1.500  | 0.291 | 7.731   |
| Sub-total     |        |       |         |
| D+L pooled ES | 1.147  | 0.496 | 2.655   |
| -----         |        |       |         |
| K - A         |        |       |         |
| 28            | 0.368  | 0.264 | 0.511   |
| 54            | 0.455  | 0.299 | 0.691   |
| Sub-total     |        |       |         |
| D+L pooled ES | 0.399  | 0.308 | 0.517   |
| -----         |        |       |         |
| I - A         |        |       |         |
| 29            | 0.349  | 0.170 | 0.718   |
| Sub-total     |        |       |         |
| D+L pooled ES | 0.349  | 0.170 | 0.718   |
| -----         |        |       |         |
| G - A         |        |       |         |
| 30            | 1.000  | 0.022 | 46.053  |
| Sub-total     |        |       |         |
| D+L pooled ES | 1.000  | 0.022 | 46.053  |
| -----         |        |       |         |
| D - A         |        |       |         |
| 31            | 25.000 | 1.605 | 389.347 |
| 36            | 9.200  | 2.403 | 35.216  |
| Sub-total     |        |       |         |
| D+L pooled ES | 11.157 | 3.341 | 37.260  |
| -----         |        |       |         |
| L - A         |        |       |         |
| 34            | 0.141  | 0.066 | 0.303   |
| Sub-total     |        |       |         |
| D+L pooled ES | 0.141  | 0.066 | 0.303   |
| -----         |        |       |         |
| R - B         |        |       |         |
| 43            | 1.059  | 0.247 | 4.544   |
| 44            | 1.071  | 0.258 | 4.455   |
| 52            | 0.800  | 0.238 | 2.692   |
| 61            | 1.118  | 0.259 | 4.815   |
| Sub-total     |        |       |         |
| D+L pooled ES | 0.982  | 0.493 | 1.954   |
| -----         |        |       |         |
| K - D         |        |       |         |
| 49            | 0.981  | 0.062 | 15.543  |
| Sub-total     |        |       |         |
| D+L pooled ES | 0.981  | 0.062 | 15.543  |
| -----         |        |       |         |
| F - D         |        |       |         |
| 50            | 2.100  | 0.206 | 21.391  |
| Sub-total     |        |       |         |
| D+L pooled ES | 2.100  | 0.206 | 21.391  |
| -----         |        |       |         |
| F - B         |        |       |         |
| 51            | 1.000  | 0.363 | 2.751   |
| 64            | 0.365  | 0.079 | 1.678   |
| 68            | 5.000  | 0.259 | 96.587  |
| 73            | 3.000  | 0.350 | 25.678  |
| 76            | 0.750  | 0.296 | 1.900   |
| Sub-total     |        |       |         |
| D+L pooled ES | 0.889  | 0.492 | 1.606   |
| -----         |        |       |         |
| G - D         |        |       |         |
| 57            | 3.000  | 0.372 | 24.171  |
| Sub-total     |        |       |         |

|               |       |       |        |
|---------------|-------|-------|--------|
| D+L pooled ES | 3.000 | 0.372 | 24.171 |
| -----         |       |       |        |
| L - K         |       |       |        |
| 59            | 0.843 | 0.561 | 1.266  |
| Sub-total     |       |       |        |
| D+L pooled ES | 0.843 | 0.561 | 1.266  |
| -----         |       |       |        |
| E - D         |       |       |        |
| 63            | 1.067 | 0.260 | 4.378  |
| Sub-total     |       |       |        |
| D+L pooled ES | 1.067 | 0.260 | 4.378  |
| -----         |       |       |        |
| F - A         |       |       |        |
| 76            | 0.375 | 0.159 | 0.884  |
| Sub-total     |       |       |        |
| D+L pooled ES | 0.375 | 0.159 | 0.884  |
| -----         |       |       |        |
| E - B         |       |       |        |
| 77            | 0.702 | 0.131 | 3.748  |
| Sub-total     |       |       |        |
| D+L pooled ES | 0.702 | 0.131 | 3.748  |
| -----         |       |       |        |

Test(s) of heterogeneity:

|       | Heterogeneity<br>statistic | degrees of<br>freedom | P     | I-squared** | Tau-squared |
|-------|----------------------------|-----------------------|-------|-------------|-------------|
| Q - I | 0.00                       | 0                     | .     | .%          | 0.0000      |
| J - A | 1.35                       | 1                     | 0.246 | 25.7%       | 0.0196      |
| O - A | 0.00                       | 0                     | .     | .%          | 0.0000      |
| O - J | 0.01                       | 1                     | 0.905 | 0.0%        | 0.0000      |
| H - A | 0.00                       | 0                     | .     | .%          | 0.0000      |
| P - A | 0.00                       | 0                     | .     | .%          | 0.0000      |
| P - H | 0.00                       | 0                     | .     | .%          | 0.0000      |
| N - D | 0.00                       | 0                     | .     | .%          | 0.0000      |
| M - B | 2.31                       | 4                     | 0.679 | 0.0%        | 0.0000      |
| B - A | 8.02                       | 8                     | 0.432 | 0.2%        | 0.0008      |
| M - A | 0.00                       | 0                     | .     | .%          | 0.0000      |
| N - B | 0.00                       | 0                     | .     | .%          | 0.0000      |
| F - C | 0.00                       | 0                     | .     | .%          | 0.0000      |
| C - B | 0.03                       | 1                     | 0.859 | 0.0%        | 0.0000      |
| D - B | 4.20                       | 3                     | 0.241 | 28.6%       | 0.3759      |
| D - C | 0.00                       | 0                     | .     | .%          | 0.0000      |
| G - B | 0.14                       | 1                     | 0.709 | 0.0%        | 0.0000      |
| K - A | 0.61                       | 1                     | 0.434 | 0.0%        | 0.0000      |
| I - A | 0.00                       | 0                     | .     | .%          | 0.0000      |
| G - A | 0.00                       | 0                     | .     | .%          | 0.0000      |
| D - A | 0.41                       | 1                     | 0.521 | 0.0%        | 0.0000      |
| L - A | 0.00                       | 0                     | .     | .%          | 0.0000      |
| R - B | 0.16                       | 3                     | 0.983 | 0.0%        | 0.0000      |
| K - D | 0.00                       | 0                     | .     | .%          | 0.0000      |
| F - D | 0.00                       | 0                     | .     | .%          | 0.0000      |
| F - B | 4.03                       | 4                     | 0.402 | 0.7%        | 0.0038      |
| G - D | 0.00                       | 0                     | .     | .%          | 0.0000      |
| L - K | 0.00                       | 0                     | .     | .%          | 0.0000      |
| E - D | 0.00                       | 0                     | .     | .%          | 0.0000      |
| F - A | 0.00                       | 0                     | .     | .%          | 0.0000      |
| E - B | 0.00                       | 0                     | .     | .%          | 0.0000      |

\*\* I-squared: the variation in ES attributable to heterogeneity)

**Net league table**

|                     |                     |                     |                     |                     |                     |                     |                     |                     |                     |                     |                     |                     |                     |                     |                     |                     |                     |
|---------------------|---------------------|---------------------|---------------------|---------------------|---------------------|---------------------|---------------------|---------------------|---------------------|---------------------|---------------------|---------------------|---------------------|---------------------|---------------------|---------------------|---------------------|
| Fluphenazine_LAI    | 0.94<br>(0.49,1.81) | 1.80<br>(1.06,3.06) | 1.26<br>(0.40,3.93) | 1.03<br>(0.59,1.80) | 1.48<br>(0.67,3.25) | 1.11<br>(0.64,1.92) | 0.99<br>(0.43,2.30) | 0.85<br>(0.51,1.42) | 1.05<br>(0.66,1.68) | 0.72<br>(0.37,1.40) | 2.84<br>(1.99,4.06) | 1.33<br>(1.05,1.68) | 1.21<br>(0.52,2.83) | 0.90<br>(0.50,1.64) | 0.70<br>(0.37,1.32) | 0.99<br>(0.24,4.09) | 0.98<br>(0.49,1.98) |
| 1.06<br>(0.55,2.05) | Flupenthixol_LAI    | 1.91<br>(0.86,4.22) | 1.34<br>(0.37,4.89) | 1.10<br>(0.47,2.55) | 1.57<br>(0.57,4.34) | 1.18<br>(0.50,2.75) | 1.06<br>(0.37,3.05) | 0.91<br>(0.40,2.06) | 1.12<br>(0.50,2.49) | 0.77<br>(0.30,1.97) | 3.02<br>(1.44,6.33) | 1.41<br>(0.70,2.84) | 1.29<br>(0.44,3.73) | 0.96<br>(0.40,2.32) | 0.74<br>(0.30,1.84) | 1.05<br>(0.22,5.00) | 1.04<br>(0.40,2.72) |
| 0.56<br>(0.33,0.95) | 0.52<br>(0.24,1.16) | Haloperidol_LAI     | 0.70<br>(0.27,2.14) | 0.57<br>(0.27,1.20) | 0.82<br>(0.33,2.04) | 0.62<br>(0.30,1.27) | 0.55<br>(0.21,1.45) | 0.48<br>(0.24,0.95) | 0.58<br>(0.30,1.13) | 0.40<br>(0.18,0.90) | 1.58<br>(0.88,2.86) | 0.74<br>(0.42,1.32) | 0.67<br>(0.26,1.78) | 0.50<br>(0.23,1.08) | 0.39<br>(0.18,0.86) | 0.55<br>(0.12,2.46) | 0.55<br>(0.23,1.32) |
| 0.79<br>(0.25,2.47) | 0.75<br>(0.20,2.73) | 1.43<br>(0.47,4.35) | (Zu)clopentixol_LAI | 0.82<br>(0.23,2.87) | 1.17<br>(0.30,4.61) | 0.88<br>(0.25,3.06) | 0.79<br>(0.19,3.20) | 0.68<br>(0.20,2.33) | 0.83<br>(0.25,2.80) | 0.57<br>(0.16,2.09) | 2.25<br>(0.69,7.32) | 1.05<br>(0.33,3.36) | 0.96<br>(0.20,2.58) | 0.72<br>(0.15,2.05) | 0.55<br>(0.15,2.01) | 0.78<br>(0.13,4.79) | 0.78<br>(0.21,2.96) |
| 0.97<br>(0.56,1.69) | 0.91<br>(0.39,2.12) | 1.74<br>(0.83,3.65) | 1.22<br>(0.35,4.29) | Pipothiazine_LAI    | 1.43<br>(0.55,3.73) | 1.07<br>(0.51,2.24) | 0.96<br>(0.36,2.55) | 0.83<br>(0.41,1.68) | 1.02<br>(0.52,2.01) | 0.70<br>(0.30,1.62) | 2.76<br>(1.50,5.05) | 1.29<br>(0.71,2.36) | 1.17<br>(0.43,3.22) | 0.88<br>(0.40,1.91) | 0.67<br>(0.30,1.51) | 0.96<br>(0.21,4.31) | 0.95<br>(0.39,2.33) |
| 0.68<br>(0.31,1.49) | 0.64<br>(0.23,1.76) | 1.22<br>(0.49,3.02) | 0.85<br>(0.22,3.35) | 0.70<br>(0.27,1.82) | Bromperidol_LAI     | 0.75<br>(0.29,1.94) | 0.67<br>(0.21,2.11) | 0.58<br>(0.23,1.46) | 0.71<br>(0.28,1.77) | 0.49<br>(0.17,1.40) | 1.92<br>(0.82,4.52) | 0.90<br>(0.39,2.05) | 0.82<br>(0.26,2.58) | 0.61<br>(0.23,1.63) | 0.47<br>(0.17,1.29) | 0.67<br>(0.13,3.38) | 0.67<br>(0.23,1.91) |
| 0.90<br>(0.52,1.57) | 0.85<br>(0.36,1.99) | 1.62<br>(0.79,3.35) | 1.14<br>(0.33,3.97) | 0.93<br>(0.45,1.95) | 1.34<br>(0.52,3.46) | 0.90<br>(0.38,2.14) | 0.77<br>(0.44,1.34) | 0.95<br>(0.57,1.59) | 0.65<br>(0.32,1.31) | 2.57<br>(1.69,3.90) | 1.20<br>(0.67,2.16) | 1.09<br>(0.40,2.99) | 0.82<br>(0.43,1.55) | 0.63<br>(0.17,1.29) | 0.89<br>(0.21,3.76) | 0.89<br>(0.37,2.16) | 0.89<br>(0.33,2.95) |
| 1.01<br>(0.43,2.33) | 0.95<br>(0.33,2.74) | 1.81<br>(0.69,4.74) | 1.27<br>(0.31,5.15) | 1.04<br>(0.39,2.74) | 1.49<br>(0.47,4.67) | 1.11<br>(0.47,2.65) | 0.86<br>(0.37,2.00) | 1.06<br>(0.47,2.40) | 0.73<br>(0.28,1.87) | 2.86<br>(1.34,6.12) | 1.34<br>(0.56,3.18) | 1.22<br>(0.37,4.00) | 0.91<br>(0.37,2.23) | 0.70<br>(0.28,1.77) | 0.99<br>(0.32,3.13) | 0.99<br>(0.33,2.95) | 0.99<br>(0.33,2.95) |

|                         |                         |                         |                         |                         |                         |                         |                         |                         |                         |                         |                          |                          |                         |                         |                         |                         |                         |
|-------------------------|-------------------------|-------------------------|-------------------------|-------------------------|-------------------------|-------------------------|-------------------------|-------------------------|-------------------------|-------------------------|--------------------------|--------------------------|-------------------------|-------------------------|-------------------------|-------------------------|-------------------------|
| 1.17<br>(0.70,1.95<br>) | 1.10<br>(0.48,2.5<br>0) | 2.10<br>(1.05,4.2<br>2) | 1.47<br>(0.43,5.06<br>) | 1.21<br>(0.60,2.4<br>4) | 1.73<br>(0.69,4.3<br>5) | 1.29<br>(0.74,2.2<br>5) | 1.16<br>(0.50,2.7<br>0) | Aripipraz<br>ole_LAI    | 1.23<br>(0.76,2.00<br>) | 0.84<br>(0.42,1.70<br>) | 3.32<br>(2.31,4.7<br>8)  | 1.55<br>(0.89,2.71<br>)  | 1.42<br>(0.53,3.7<br>8) | 1.06<br>(0.67,1.6<br>6) | 0.81<br>(0.43,1.5<br>5) | 1.15<br>(0.28,4.7<br>9) | 1.15<br>(0.48,2.7<br>3) |
| 0.95<br>(0.60,1.52<br>) | 0.90<br>(0.40,2.0<br>0) | 1.71<br>(0.89,3.3<br>0) | 1.20<br>(0.36,4.03<br>) | 0.98<br>(0.50,1.9<br>4) | 1.41<br>(0.56,3.5<br>1) | 1.05<br>(0.63,1.7<br>7) | 0.95<br>(0.42,2.1<br>3) | 0.81<br>(0.50,1.3<br>2) | Paliperido<br>ne_LAI_1  | 0.69<br>(0.42,1.11<br>) | 2.70<br>(1.99,3.6<br>7)  | 1.26<br>(0.76,2.10<br>)  | 1.15<br>(0.44,3.0<br>3) | 0.86<br>(0.49,1.5<br>2) | 0.66<br>(0.36,1.2<br>2) | 0.94<br>(0.23,3.8<br>5) | 0.94<br>(0.40,2.1<br>7) |
| 1.39<br>(0.71,2.70<br>) | 1.30<br>(0.51,3.3<br>5) | 2.49<br>(1.12,5.5<br>6) | 1.75<br>(0.48,6.38<br>) | 1.43<br>(0.62,3.3<br>3) | 2.05<br>(0.72,5.8<br>7) | 1.53<br>(0.76,3.0<br>9) | 1.38<br>(0.54,3.5<br>4) | 1.19<br>(0.59,2.3<br>9) | 1.46<br>(0.90,2.36<br>) | Paliperido<br>ne_LAI_3  | 3.94<br>(2.25,6.9<br>1)  | 1.84<br>(0.93,3.65<br>)  | 1.68<br>(0.57,4.9<br>6) | 1.25<br>(0.60,2.6<br>3) | 0.96<br>(0.45,2.0<br>9) | 1.37<br>(0.31,6.0<br>5) | 1.36<br>(0.52,3.5<br>9) |
| 0.35<br>(0.25,0.50<br>) | 0.33<br>(0.16,0.6<br>9) | 0.63<br>(0.35,1.1<br>4) | 0.44<br>(0.14,1.44<br>) | 0.36<br>(0.20,0.6<br>7) | 0.52<br>(0.22,1.2<br>2) | 0.39<br>(0.26,0.5<br>9) | 0.35<br>(0.16,0.7<br>5) | 0.30<br>(0.21,0.4<br>3) | 0.37<br>(0.27,0.50<br>) | 0.25<br>(0.14,0.45<br>) | Placebo                  | 0.47<br>(0.31,0.71<br>)  | 0.43<br>(0.17,1.0<br>6) | 0.32<br>(0.20,0.5<br>2) | 0.24<br>(0.14,0.4<br>2) | 0.35<br>(0.09,1.3<br>3) | 0.35<br>(0.16,0.7<br>6) |
| 0.75<br>(0.60,0.95<br>) | 0.71<br>(0.35,1.4<br>2) | 1.35<br>(0.76,2.4<br>1) | 0.95<br>(0.30,3.02<br>) | 0.78<br>(0.42,1.4<br>2) | 1.11<br>(0.49,2.5<br>4) | 0.83<br>(0.46,1.5<br>8) | 0.75<br>(0.31,1.7<br>8) | 0.64<br>(0.37,1.1<br>2) | 0.79<br>(0.48,1.31<br>) | 0.54<br>(0.27,1.08<br>) | 2.14<br>(1.41,3.2<br>4)  | Phenotiaz<br>ines_OS     | 0.91<br>(0.38,2.2<br>0) | 0.68<br>(0.36,1.2<br>8) | 0.52<br>(0.27,1.0<br>3) | 0.74<br>(0.18,3.1<br>3) | 0.74<br>(0.35,1.5<br>5) |
| 0.83<br>(0.35,1.93<br>) | 0.78<br>(0.27,2.2<br>5) | 1.48<br>(0.58,3.8<br>0) | 1.04<br>(0.26,4.20<br>) | 0.85<br>(0.31,2.3<br>4) | 1.22<br>(0.39,3.8<br>5) | 0.91<br>(0.33,2.5<br>0) | 0.82<br>(0.25,2.6<br>9) | 0.71<br>(0.26,1.8<br>8) | 0.87<br>(0.33,2.28<br>) | 0.60<br>(0.20,1.76<br>) | 2.35<br>(0.94,5.8<br>6)  | 1.10<br>(0.45,2.65<br>)  | Haloperi<br>dol_OS      | 0.75<br>(0.27,2.0<br>9) | 0.57<br>(0.20,1.6<br>5) | 0.82<br>(0.16,4.2<br>5) | 0.81<br>(0.27,2.4<br>4) |
| 1.11<br>(0.61,2.02<br>) | 1.04<br>(0.43,2.5<br>2) | 1.99<br>(0.93,4.2<br>7) | 1.40<br>(0.39,4.98<br>) | 1.14<br>(0.53,2.4<br>8) | 1.64<br>(0.61,4.3<br>6) | 1.23<br>(0.65,2.3<br>2) | 1.10<br>(0.45,2.7<br>0) | 0.95<br>(0.60,1.4<br>9) | 1.16<br>(0.66,2.06<br>) | 0.80<br>(0.38,1.68<br>) | 3.15<br>(1.95,5.0<br>9)  | 1.47<br>(0.78,2.78<br>7) | 1.34<br>(0.48,3.7<br>7) | Aripipraz<br>ole_OS     | 0.77<br>(0.38,1.5<br>7) | 1.09<br>(0.25,4.7<br>0) | 1.09<br>(0.43,2.7<br>3) |
| 1.44<br>(0.76,2.72<br>) | 1.35<br>(0.54,3.3<br>6) | 2.58<br>(1.17,5.7<br>1) | 1.81<br>(0.50,6.58<br>) | 1.48<br>(0.66,3.3<br>1) | 2.12<br>(0.78,5.8<br>0) | 1.59<br>(0.95,2.6<br>6) | 1.43<br>(0.57,3.6<br>0) | 1.23<br>(0.65,2.3<br>3) | 1.51<br>(0.82,2.78<br>) | 1.04<br>(0.48,2.24<br>) | 4.08<br>(2.41,6.9<br>3)  | 1.91<br>(0.98,3.74<br>)  | 1.74<br>(0.60,5.0<br>0) | 1.30<br>(0.63,2.6<br>5) | Olanzapi<br>ne_OS       | 1.42<br>(0.32,6.1<br>9) | 1.41<br>(0.55,3.6<br>4) |
| 1.01<br>(0.24,4.20<br>) | 0.95<br>(0.20,4.5<br>4) | 1.82<br>(0.41,8.1<br>4) | 1.28<br>(0.21,7.81<br>) | 1.04<br>(0.23,4.7<br>0) | 1.50<br>(0.30,7.5<br>7) | 1.12<br>(0.27,4.7<br>7) | 1.01<br>(0.32,3.1<br>7) | 0.87<br>(0.21,3.6<br>0) | 1.06<br>(0.26,4.36<br>) | 0.73<br>(0.17,3.23<br>) | 2.88<br>(0.73,11.<br>40) | 1.35<br>(0.32,5.67<br>)  | 1.23<br>(0.24,6.4<br>0) | 0.91<br>(0.21,3.9<br>3) | 0.71<br>(0.16,3.0<br>8) | Risperid<br>one_OS      | 1.00<br>(0.20,4.8<br>6) |
| 1.02<br>(0.51,2.05<br>) | 0.96<br>(0.37,2.5<br>0) | 1.83<br>(0.76,4.4<br>0) | 1.28<br>(0.34,4.87<br>) | 1.05<br>(0.43,2.5<br>6) | 1.50<br>(0.52,4.3<br>1) | 1.13<br>(0.46,2.7<br>4) | 1.01<br>(0.34,3.0<br>1) | 0.87<br>(0.37,2.0<br>6) | 1.07<br>(0.46,2.48<br>) | 0.73<br>(0.28,1.93<br>) | 2.89<br>(1.32,6.3<br>4)  | 1.35<br>(0.65,2.83<br>)  | 1.23<br>(0.41,3.7<br>0) | 0.92<br>(0.37,2.3<br>0) | 0.71<br>(0.27,1.8<br>2) | 1.00<br>(0.21,4.9<br>0) | DBP_OS                  |

Net league table: head-to-head comparisons. Relative risks (RRs) and 95% confidence intervals (CIs) are reported. RRs lower than 1 favour the column-defining treatment. Statistically significant results are highlighted in grey. LAI=long-acting antipsychotics

### Evaluation of heterogeneity and incoherence

#### Overall heterogeneity

Estimated between-studies SD: .12469547

#### Overall incoherence

Design-by-treatment test: P = 0.410

#### Loop-specific approach

\* 17 triangular loops found

Note: Heterogeneity of loop A-D-F cannot be estimated due to insufficient observations - set equal to 0

Note: Heterogeneity of loop A-D-G cannot be estimated due to insufficient observations - set equal to 0

Note: Heterogeneity of loop A-H-P cannot be estimated due to insufficient observations - set equal to 0

Note: Heterogeneity of loop A-J-O cannot be estimated due to insufficient observations - set equal to 0

Note: Heterogeneity of loop A-K-L cannot be estimated due to insufficient observations - set equal to 0

Note: Heterogeneity of loop C-D-F cannot be estimated due to insufficient observations - set equal to 0

Evaluation of inconsistency using loop-specific heterogeneity estimates:

| Loop  | ROR    | z_value | p_value | CI_95          | Loop_Heterog_tau2 |
|-------|--------|---------|---------|----------------|-------------------|
| A-D-F | 62.478 | 2.944   | 0.003   | (3.98,980.01)  | 0.000             |
| A-B-D | 36.264 | 4.655   | 0.000   | (7.99,164.49)  | 0.025             |
| A-D-G | 33.470 | 1.521   | 0.128   | (1.00,3089.02) | 0.000             |
| A-D-K | 27.444 | 2.146   | 0.032   | (1.33,565.57)  | 0.000             |
| C-D-F | 4.447  | 0.609   | 0.543   | (1.00,543.07)  | 0.000             |
| A-B-G | 2.897  | 0.529   | 0.597   | (1.00,148.91)  | 0.000             |
| A-B-M | 2.818  | 1.704   | 0.088   | (1.00,9.28)    | 0.000             |
| B-D-G | 2.610  | 0.760   | 0.447   | (1.00,31.02)   | 0.064             |
| A-K-L | 2.384  | 1.886   | 0.059   | (1.00,5.88)    | 0.000             |
| B-D-F | 2.228  | 0.586   | 0.558   | (1.00,32.45)   | 0.112             |
| A-B-F | 1.681  | 0.897   | 0.370   | (1.00,5.22)    | 0.000             |
| B-C-F | 1.417  | 0.172   | 0.864   | (1.00,75.45)   | 0.000             |
| B-C-D | 1.291  | 0.248   | 0.804   | (1.00,9.73)    | 0.040             |
| B-D-N | 1.284  | 0.173   | 0.863   | (1.00,21.89)   | 0.376             |
| B-D-E | 1.281  | 0.163   | 0.870   | (1.00,25.10)   | 0.376             |
| A-J-O | 1.199  | 0.385   | 0.700   | (1.00,3.02)    | 0.000             |
| A-H-P | .      | .       | .       | .              | 0.000             |

\*\*\* Note: Loop A-H-P is formed only by multi-arm trial(s) - Consistent by definition

#### Consistency between direct and indirect estimates

| Side  | Direct<br>Coef. | Std. Err. | Indirect<br>Coef. | Std. Err. | Difference<br>Coef. | Std. Err. | P> z  |
|-------|-----------------|-----------|-------------------|-----------|---------------------|-----------|-------|
| A B   | -1.320289       | .2129636  | .372854           | .5232487  | -1.693143           | .5886798  | 0.004 |
| A D   | 2.412044        | .6152606  | -1.312559         | .3362532  | 3.724604            | .7011503  | 0.000 |
| A F   | -.9048191       | .4588046  | -1.098684         | .4231059  | .1938649            | .6144835  | 0.752 |
| A G   | 1.96e-10        | 1.958119  | -.6877813         | .4473407  | .6877813            | 2.008567  | 0.732 |
| A H   | .               | .         | .                 | .         | .                   | .         | .     |
| A I * | -1.051352       | .3877984  | 2.13e-06          | 99.97588  | -1.051354           | 99.97663  | 0.992 |
| A J * | -1.197957       | .2301372  | -1.06275          | 1.043247  | -.1352077           | 1.07513   | 0.900 |
| A K   | -.9194          | .13217    | -1.673719         | .4221332  | .7543188            | .4423408  | 0.088 |
| A L   | -1.959192       | .3897856  | -1.086337         | .245568   | -.8728557           | .4606913  | 0.058 |
| A M   | -1.990255       | .532862   | -.5546306         | .2109888  | -1.435624           | .5793683  | 0.013 |
| A O   | -1.016585       | .3060854  | -1.434901         | .458978   | .4183162            | .5497346  | 0.447 |
| A P   | .               | .         | .                 | .         | .                   | .         | .     |
| B C   | -.120033        | .3707594  | .2374028          | .8219469  | -.3574358           | .9017768  | 0.692 |
| B D   | .0590448        | .3973599  | 1.084457          | .3776427  | -1.025412           | .545909   | 0.060 |
| B E   | -.3541907       | .8639933  | .71144            | .7828001  | -1.065631           | 1.165864  | 0.361 |
| B F   | -.1138402       | .3039993  | .7310599          | .6424289  | -.8449001           | .6960527  | 0.225 |
| B G   | .1393851        | .4355164  | 1.602761          | .9644333  | -1.463376           | 1.058296  | 0.167 |
| B M * | .3096633        | .0898767  | -2.228936         | .9760621  | 2.538599            | .9819254  | 0.010 |
| B N   | .0791596        | .4904677  | .6225186          | .9580679  | -.543359            | 1.07631   | 0.614 |
| B R * | -.0174463       | .3567547  | 2.071743          | 100.0108  | -2.08919            | 100.0102  | 0.983 |
| C D   | .4054298        | .8538519  | .7146673          | .4635783  | -.3092374           | .9715814  | 0.750 |
| C F   | -.345014        | 1.978887  | .1130379          | .4425608  | -.4580519           | 2.027773  | 0.821 |
| D E   | .0645142        | .7313255  | -1.001021         | .9079803  | 1.065535            | 1.165868  | 0.361 |
| D F   | .7418595        | 1.190133  | -.6990023         | .3950853  | 1.440862            | 1.253997  | 0.251 |
| D G   | 1.098546        | 1.069504  | -.4906761         | .5071348  | 1.589222            | 1.183646  | 0.179 |
| D K   | -.0193636       | 1.416251  | -.5685537         | .3495419  | .5491901            | 1.45875   | 0.707 |
| D N   | -.0000285       | .9154576  | -.543304          | .5660326  | .5432755            | 1.076312  | 0.614 |
| H P   | .               | .         | .                 | .         | .                   | .         | .     |
| I Q * | -.00625         | .5853467  | 2.096361          | 199.9466  | -2.102611           | 199.9458  | 0.992 |
| J O * | -.0277713       | .2314605  | .731344           | .6405484  | -.7591153           | .679204   | 0.264 |
| K L   | -.1708405       | .207317   | -1.043683         | .4114069  | .8728421            | .4606905  | 0.058 |

\* Warning: all the evidence about these contrasts comes from the trials which directly compare them.

**Funnel plot**

Not applicable: no comparisons with 10 or more studies.

## Supplement I - Sensitivity analysis: relapse (excluding trials comparing LAIs with placebo)

### Treatment codes

|                      |   |
|----------------------|---|
| Fluphenazine LAI     | A |
| Flupenthixol LAI     | B |
| Haloperidol LAI      | C |
| (Zu)clopenthixol LAI | D |
| Pipothiazine LAI     | E |
| Bromperidol LAI      | F |
| Olanzapine LAI       | G |
| Risperidone LAI      | H |
| Aripiprazole LAI     | I |
| Paliperidone LAI-1   | J |
| Paliperidone LAI-3   | K |
| Phenothiazines OS    | L |
| Haloperidol OS       | M |
| Aripiprazole OS      | N |
| Olanzapine OS        | O |
| Risperidone OS       | P |
| Quetiapine OS        | Q |
| Paliperidone OS      | R |
| DBP_OS               | S |

### Network map

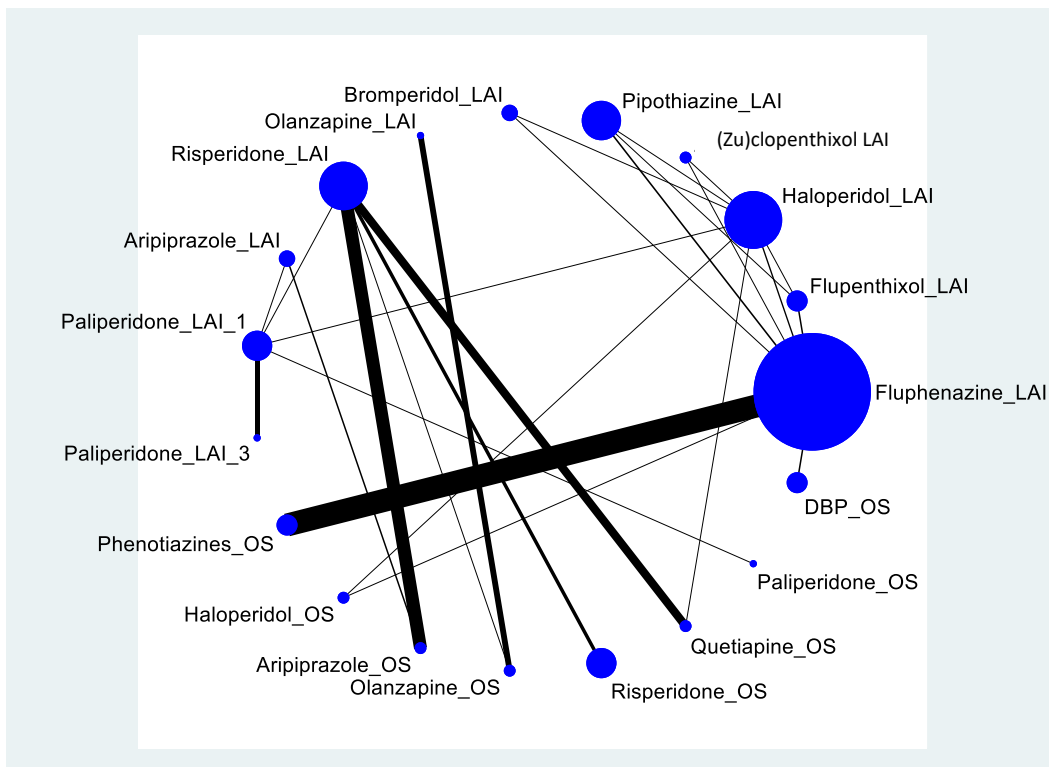

### Pairwise meta-analysis

| Study | ES    | [95% Conf. Interval] |        |
|-------|-------|----------------------|--------|
| ----- |       |                      |        |
| P - H |       |                      |        |
| 1     | 0.994 | 0.324                | 3.049  |
| 2     | 0.333 | 0.037                | 2.991  |
| 3     | 7.000 | 1.692                | 28.960 |
| 4     | 0.901 | 0.450                | 1.806  |



|       |               |       |       |         |
|-------|---------------|-------|-------|---------|
| 5     |               | 0.974 | 0.063 | 14.998  |
| 58    |               | 0.817 | 0.319 | 2.091   |
|       | Sub-total     |       |       |         |
|       | D+L pooled ES | 1.127 | 0.583 | 2.177   |
| ----- |               |       |       |         |
|       | N - I         |       |       |         |
| 7     |               | 1.004 | 0.503 | 2.006   |
|       | Sub-total     |       |       |         |
|       | D+L pooled ES | 1.004 | 0.503 | 2.006   |
| ----- |               |       |       |         |
|       | O - G         |       |       |         |
| 9     |               | 0.920 | 0.647 | 1.306   |
|       | Sub-total     |       |       |         |
|       | D+L pooled ES | 0.920 | 0.647 | 1.306   |
| ----- |               |       |       |         |
|       | M - C         |       |       |         |
| 10    |               | 1.000 | 0.170 | 5.888   |
|       | Sub-total     |       |       |         |
|       | D+L pooled ES | 1.000 | 0.170 | 5.888   |
| ----- |               |       |       |         |
|       | L - A         |       |       |         |
| 11    |               | 1.293 | 1.034 | 1.616   |
| 13    |               | 1.600 | 1.089 | 2.351   |
| 14    |               | 1.310 | 0.833 | 2.058   |
| 19    |               | 7.500 | 0.438 | 128.401 |
|       | Sub-total     |       |       |         |
|       | D+L pooled ES | 1.364 | 1.143 | 1.629   |
| ----- |               |       |       |         |
|       | M - A         |       |       |         |
| 15    |               | 1.082 | 0.431 | 2.718   |
|       | Sub-total     |       |       |         |
|       | D+L pooled ES | 1.082 | 0.431 | 2.718   |
| ----- |               |       |       |         |
|       | Q - C         |       |       |         |
| 16    |               | 2.105 | 0.547 | 8.097   |
|       | Sub-total     |       |       |         |
|       | D+L pooled ES | 2.105 | 0.547 | 8.097   |
| ----- |               |       |       |         |
|       | Q - H         |       |       |         |
| 17    |               | 1.889 | 1.406 | 2.538   |
|       | Sub-total     |       |       |         |
|       | D+L pooled ES | 1.889 | 1.406 | 2.538   |
| ----- |               |       |       |         |
|       | N - H         |       |       |         |
| 18    |               | 0.942 | 0.744 | 1.192   |
|       | Sub-total     |       |       |         |
|       | D+L pooled ES | 0.942 | 0.744 | 1.192   |
| ----- |               |       |       |         |
|       | E - B         |       |       |         |
| 20    |               | 0.708 | 0.015 | 33.972  |
|       | Sub-total     |       |       |         |
|       | D+L pooled ES | 0.708 | 0.015 | 33.972  |
| ----- |               |       |       |         |
|       | B - A         |       |       |         |
| 21    |               | 1.000 | 0.219 | 4.564   |
| 62    |               | 0.857 | 0.395 | 1.859   |
|       | Sub-total     |       |       |         |
|       | D+L pooled ES | 0.885 | 0.444 | 1.763   |
| ----- |               |       |       |         |
|       | J - I         |       |       |         |
| 23    |               | 1.007 | 0.020 | 50.403  |
| 24    |               | 2.353 | 0.894 | 6.192   |
|       | Sub-total     |       |       |         |
|       | D+L pooled ES | 2.241 | 0.876 | 5.732   |
| ----- |               |       |       |         |
|       | C - A         |       |       |         |
| 25    |               | 0.167 | 0.022 | 1.255   |
| 46    |               | 1.034 | 0.068 | 15.773  |
| 47    |               | 0.909 | 0.020 | 41.676  |
| 55    |               | 0.688 | 0.045 | 10.417  |
| 74    |               | 1.611 | 0.672 | 3.861   |
|       | Sub-total     |       |       |         |
|       | D+L pooled ES | 1.010 | 0.455 | 2.240   |
| ----- |               |       |       |         |
|       | C - B         |       |       |         |
| 26    |               | 1.500 | 0.288 | 7.807   |
|       | Sub-total     |       |       |         |
|       | D+L pooled ES | 1.500 | 0.288 | 7.807   |

|               |       |       |         |
|---------------|-------|-------|---------|
| -----         |       |       |         |
| F - A         |       |       |         |
| 27            | 1.043 | 0.393 | 2.770   |
| 56            | 1.500 | 0.291 | 7.731   |
| Sub-total     |       |       |         |
| D+L pooled ES | 1.147 | 0.496 | 2.655   |
| -----         |       |       |         |
| R - J         |       |       |         |
| 32            | 1.000 | 0.065 | 15.380  |
| Sub-total     |       |       |         |
| D+L pooled ES | 1.000 | 0.065 | 15.380  |
| -----         |       |       |         |
| E - A         |       |       |         |
| 33            | 8.224 | 0.453 | 149.154 |
| 51            | 1.000 | 0.363 | 2.751   |
| 53            | 0.467 | 0.089 | 2.454   |
| 64            | 0.365 | 0.079 | 1.678   |
| 68            | 5.000 | 0.259 | 96.587  |
| 73            | 3.000 | 0.350 | 25.678  |
| Sub-total     |       |       |         |
| D+L pooled ES | 1.058 | 0.459 | 2.437   |
| -----         |       |       |         |
| J - H         |       |       |         |
| 42            | 1.133 | 0.024 | 53.684  |
| Sub-total     |       |       |         |
| D+L pooled ES | 1.133 | 0.024 | 53.684  |
| -----         |       |       |         |
| S - A         |       |       |         |
| 43            | 1.059 | 0.247 | 4.544   |
| 44            | 1.071 | 0.258 | 4.455   |
| 52            | 0.800 | 0.238 | 2.692   |
| 61            | 1.118 | 0.259 | 4.815   |
| Sub-total     |       |       |         |
| D+L pooled ES | 0.982 | 0.493 | 1.954   |
| -----         |       |       |         |
| O - H         |       |       |         |
| 48            | 3.000 | 0.129 | 69.515  |
| Sub-total     |       |       |         |
| D+L pooled ES | 3.000 | 0.129 | 69.515  |
| -----         |       |       |         |
| J - C         |       |       |         |
| 49            | 0.981 | 0.062 | 15.543  |
| Sub-total     |       |       |         |
| D+L pooled ES | 0.981 | 0.062 | 15.543  |
| -----         |       |       |         |
| E - C         |       |       |         |
| 50            | 2.100 | 0.206 | 21.391  |
| Sub-total     |       |       |         |
| D+L pooled ES | 2.100 | 0.206 | 21.391  |
| -----         |       |       |         |
| F - C         |       |       |         |
| 57            | 3.000 | 0.372 | 24.171  |
| Sub-total     |       |       |         |
| D+L pooled ES | 3.000 | 0.372 | 24.171  |
| -----         |       |       |         |
| K - J         |       |       |         |
| 59            | 0.843 | 0.561 | 1.266   |
| Sub-total     |       |       |         |
| D+L pooled ES | 0.843 | 0.561 | 1.266   |
| -----         |       |       |         |
| D - C         |       |       |         |
| 63            | 1.067 | 0.260 | 4.378   |
| Sub-total     |       |       |         |
| D+L pooled ES | 1.067 | 0.260 | 4.378   |
| -----         |       |       |         |
| D - A         |       |       |         |
| 77            | 0.702 | 0.131 | 3.748   |
| Sub-total     |       |       |         |
| D+L pooled ES | 0.702 | 0.131 | 3.748   |
| -----         |       |       |         |

Test(s) of heterogeneity:

|       | Heterogeneity<br>statistic | degrees of<br>freedom | P     | I-squared** | Tau-squared |
|-------|----------------------------|-----------------------|-------|-------------|-------------|
| P - H | 8.38                       | 5                     | 0.137 | 40.3%       | 0.2517      |
| N - I | 0.00                       | 0                     | .     | .%          | 0.0000      |
| O - G | 0.00                       | 0                     | .     | .%          | 0.0000      |

|       |      |   |       |       |        |
|-------|------|---|-------|-------|--------|
| M - C | 0.00 | 0 | .     | .%    | 0.0000 |
| L - A | 2.30 | 3 | 0.513 | 0.0%  | 0.0000 |
| M - A | 0.00 | 0 | .     | .%    | 0.0000 |
| Q - C | 0.00 | 0 | .     | .%    | 0.0000 |
| Q - H | 0.00 | 0 | .     | .%    | 0.0000 |
| N - H | 0.00 | 0 | .     | .%    | 0.0000 |
| E - B | 0.00 | 0 | .     | .%    | 0.0000 |
| B - A | 0.03 | 1 | 0.859 | 0.0%  | 0.0000 |
| J - I | 0.17 | 1 | 0.680 | 0.0%  | 0.0000 |
| C - A | 4.21 | 4 | 0.378 | 5.0%  | 0.0583 |
| C - B | 0.00 | 0 | .     | .%    | 0.0000 |
| F - A | 0.14 | 1 | 0.709 | 0.0%  | 0.0000 |
| R - J | 0.00 | 0 | .     | .%    | 0.0000 |
| E - A | 6.66 | 5 | 0.248 | 24.9% | 0.2671 |
| J - H | 0.00 | 0 | .     | .%    | 0.0000 |
| S - A | 0.16 | 3 | 0.983 | 0.0%  | 0.0000 |
| O - H | 0.00 | 0 | .     | .%    | 0.0000 |
| J - C | 0.00 | 0 | .     | .%    | 0.0000 |
| E - C | 0.00 | 0 | .     | .%    | 0.0000 |
| F - C | 0.00 | 0 | .     | .%    | 0.0000 |
| K - J | 0.00 | 0 | .     | .%    | 0.0000 |
| D - C | 0.00 | 0 | .     | .%    | 0.0000 |
| D - A | 0.00 | 0 | .     | .%    | 0.0000 |

\*\* I-squared: the variation in ES attributable to heterogeneity)

### Net league table

|                      |                      |                      |                      |                      |                      |                       |                      |                      |                      |                      |                      |                      |                      |                        |                      |                      |                      |                      |
|----------------------|----------------------|----------------------|----------------------|----------------------|----------------------|-----------------------|----------------------|----------------------|----------------------|----------------------|----------------------|----------------------|----------------------|------------------------|----------------------|----------------------|----------------------|----------------------|
| Fluphenazine_LAI     | 0.85<br>(0.45,1.61)  | 0.95<br>(0.53,1.68)  | 0.87<br>(0.28,2.69)  | 1.02<br>(0.54,1.94)  | 1.30<br>(0.60,2.85)  | 2.98<br>(0.09,93.71)  | 0.91<br>(0.23,3.62)  | 0.81<br>(0.18,3.59)  | 1.65<br>(0.33,8.23)  | 1.39<br>(0.27,7.30)  | 1.36<br>(1.14,1.63)  | 1.05<br>(0.46,2.40)  | 0.86<br>(0.21,3.44)  | 2.74<br>(0.09,84.65)   | 0.97<br>(0.23,4.13)  | 1.74<br>(0.45,6.75)  | 1.65<br>(0.07,39.33) | 0.98<br>(0.49,1.95)  |
| 1.17<br>(0.62,2.21)  | Flupentixol_LAI      | 1.11<br>(0.50,2.46)  | 1.02<br>(0.28,3.64)  | 1.20<br>(0.50,2.90)  | 1.53<br>(0.56,4.15)  | 3.49<br>(0.11,11.72)  | 1.07<br>(0.24,4.72)  | 0.95<br>(0.19,4.65)  | 1.94<br>(0.35,10.58) | 1.63<br>(0.28,9.35)  | 1.60<br>(0.83,3.04)  | 1.23<br>(0.44,3.46)  | 1.00<br>(0.22,4.48)  | 1.00<br>(0.10,10.3.64) | 3.21<br>(0.24,5.36)  | 1.14<br>(0.47,8.81)  | 2.04<br>(0.08,48.33) | 1.94<br>(0.45,2.93)  |
| 1.06<br>(0.59,1.87)  | 0.90<br>(0.41,2.00)  | Haloperidol_LAI      | 0.92<br>(0.30,2.77)  | 1.08<br>(0.47,2.47)  | 1.37<br>(0.55,3.46)  | 3.15<br>(0.11,94.29)  | 0.97<br>(0.28,3.37)  | 0.86<br>(0.22,3.38)  | 1.74<br>(0.39,7.82)  | 1.47<br>(0.31,6.96)  | 1.44<br>(0.79,2.68)  | 1.11<br>(0.44,2.21)  | 0.90<br>(0.25,3.15)  | 2.89<br>(0.10,85.15)   | 1.02<br>(0.27,3.88)  | 1.84<br>(0.54,6.27)  | 1.74<br>(0.08,39.40) | 1.04<br>(0.42,2.54)  |
| 1.15<br>(0.37,3.57)  | 0.98<br>(0.27,3.51)  | 1.09<br>(0.36,3.30)  | (Zu)clopenthixol_LAI | 1.18<br>(0.33,4.27)  | 1.50<br>(0.39,5.81)  | 3.43<br>(0.10,12.254) | 1.05<br>(0.20,5.59)  | 0.93<br>(0.16,5.44)  | 1.90<br>(0.30,12.26) | 1.60<br>(0.24,10.80) | 1.57<br>(0.50,4.93)  | 1.21<br>(0.31,4.77)  | 0.99<br>(0.18,5.29)  | 3.16<br>(0.09,11.07)   | 1.12<br>(0.20,6.30)  | 2.00<br>(0.38,10.45) | 1.90<br>(0.07,51.98) | 1.13<br>(0.30,4.25)  |
| 0.98<br>(0.52,1.85)  | 0.83<br>(0.34,2.02)  | 0.93<br>(0.40,2.12)  | 0.85<br>(0.23,3.07)  | Pipothiazine_LAI     | 1.27<br>(0.47,3.48)  | 2.91<br>(0.09,96.36)  | 0.89<br>(0.20,4.00)  | 0.79<br>(0.16,3.94)  | 1.61<br>(0.29,8.95)  | 1.36<br>(0.23,7.91)  | 1.33<br>(0.69,2.58)  | 1.03<br>(0.36,2.90)  | 0.84<br>(0.18,3.06)  | 2.68<br>(0.08,87.06)   | 0.95<br>(0.20,4.54)  | 1.70<br>(0.39,7.47)  | 1.61<br>(0.06,40.98) | 0.96<br>(0.38,2.45)  |
| 0.77<br>(0.35,1.68)  | 0.66<br>(0.24,1.78)  | 0.73<br>(0.17,2.59)  | 0.67<br>(0.17,2.59)  | 0.79<br>(0.15,1.15)  | Bromperidol_LAI      | 2.29<br>(0.07,77.57)  | 0.70<br>(0.15,3.32)  | 0.62<br>(0.12,3.26)  | 1.27<br>(0.22,7.38)  | 1.07<br>(0.18,6.52)  | 1.05<br>(0.47,2.34)  | 0.81<br>(0.26,2.15)  | 0.66<br>(0.14,3.09)  | 2.11<br>(0.06,70.09)   | 0.75<br>(0.15,3.76)  | 1.34<br>(0.29,6.20)  | 1.27<br>(0.07,52.76) | 0.75<br>(0.27,2.14)  |
| 0.34<br>(0.01,10.54) | 0.29<br>(0.01,9.40)  | 0.32<br>(0.01,9.0)   | 0.29<br>(0.01,10.4)  | 0.34<br>(0.01,11.35) | Olanzapine_LAI       | 0.44<br>(0.01,14.78)  | 0.31<br>(0.01,7.24)  | 0.27<br>(0.02,15.93) | 0.55<br>(0.02,15.46) | 0.47<br>(0.02,13.46) | 0.46<br>(0.01,14.45) | 0.35<br>(0.01,11.84) | 0.29<br>(0.01,6.13)  | 0.92<br>(0.05,1.39)    | 0.33<br>(0.01,7.93)  | 0.58<br>(0.02,13.96) | 0.55<br>(0.01,41.37) | 0.33<br>(0.01,11.08) |
| 1.09<br>(0.28,4.33)  | 0.93<br>(0.21,4.11)  | 1.04<br>(0.30,3.62)  | 0.95<br>(0.18,5.04)  | 1.12<br>(0.25,6.01)  | 1.42<br>(0.30,6.73)  | 3.26<br>(0.14,76.95)  | 0.89<br>(0.04,1.79)  | 1.81<br>(0.62,5.25)  | 1.52<br>(0.49,4.77)  | 1.49<br>(0.37,5.98)  | 1.15<br>(0.24,5.48)  | 0.94<br>(0.18,3.18)  | 3.00<br>(0.13,69.39) | 1.06<br>(0.67,1.67)    | 1.90<br>(0.42,2.55)  | 1.81<br>(0.10,33.96) | 1.07<br>(0.23,5.00)  |                      |
| 1.23<br>(0.28,5.47)  | 1.05<br>(0.22,5.16)  | 1.17<br>(0.30,4.62)  | 1.07<br>(0.18,3.26)  | 1.26<br>(0.25,6.41)  | 1.61<br>(0.31,8.41)  | 3.68<br>(0.14,93.85)  | 1.13<br>(0.56,2.28)  | 2.04<br>(0.85,4.92)  | 1.72<br>(0.65,4.53)  | 1.68<br>(0.38,7.58)  | 1.30<br>(0.25,6.84)  | 1.06<br>(0.54,2.06)  | 3.38<br>(0.14,84.77) | 1.20<br>(0.52,2.77)    | 2.15<br>(1.01,4.58)  | 2.04<br>(0.12,36.58) | 1.21<br>(0.23,6.23)  |                      |
| 0.61<br>(0.12,3.02)  | 0.52<br>(0.09,2.82)  | 0.57<br>(0.13,2.57)  | 0.53<br>(0.08,3.39)  | 0.62<br>(0.11,3.44)  | 0.79<br>(0.14,4.58)  | 1.80<br>(0.06,50.76)  | 0.55<br>(0.19,1.61)  | 0.49<br>(0.20,1.18)  | 0.84<br>(0.27,1.71)  | 0.84<br>(0.56,1.27)  | 0.64<br>(0.11,3.73)  | 0.52<br>(0.18,1.48)  | 1.66<br>(0.06,45.87) | 0.59<br>(0.20,2.87)    | 1.05<br>(0.35,3.15)  | 1.00<br>(0.07,15.38) | 0.59<br>(0.10,3.41)  |                      |
| 0.72<br>(0.14,3.76)  | 0.61<br>(0.11,3.51)  | 0.68<br>(0.14,3.22)  | 0.62<br>(0.09,4.20)  | 0.73<br>(0.13,4.27)  | 0.93<br>(0.15,5.69)  | 2.14<br>(0.07,61.72)  | 0.66<br>(0.22,2.06)  | 0.58<br>(0.22,1.79)  | 1.19<br>(0.79,1.98)  | 0.98<br>(0.19,5.18)  | 0.76<br>(0.12,4.63)  | 0.61<br>(0.20,1.90)  | 1.97<br>(0.07,55.72) | 0.70<br>(0.20,2.38)    | 1.25<br>(0.39,4.02)  | 1.19<br>(0.07,18.80) | 0.71<br>(0.24,2.42)  |                      |
| 0.73<br>(0.61,0.87)  | 0.63<br>(0.32,1.21)  | 0.69<br>(0.38,1.27)  | 0.64<br>(0.20,2.00)  | 0.75<br>(0.39,1.45)  | 0.95<br>(0.43,2.43)  | 2.19<br>(0.07,68.99)  | 0.67<br>(0.17,2.69)  | 1.21<br>(0.13,2.66)  | 1.02<br>(0.24,6.0)   | 1.02<br>(0.19,5.4)   | Phenothiazines_OS    | 0.77<br>(0.33,1.79)  | 0.63<br>(0.15,2.55)  | 2.01<br>(0.06,62.32)   | 0.71<br>(0.17,3.06)  | 1.27<br>(0.32,5.00)  | 1.21<br>(0.05,28.97) | 0.72<br>(0.35,1.46)  |
| 0.95<br>(0.42,2.17)  | 0.81<br>(0.29,2.28)  | 0.90<br>(0.35,2.29)  | 0.83<br>(0.21,3.25)  | 0.97<br>(0.34,2.75)  | 1.24<br>(0.40,3.83)  | 2.83<br>(0.08,96.27)  | 0.87<br>(0.18,4.14)  | 0.77<br>(0.15,4.06)  | 1.57<br>(0.27,9.19)  | 1.32<br>(0.22,8.11)  | 1.30<br>(0.56,3.02)  | Haloperidol_OS       | 0.81<br>(0.17,3.92)  | 2.61<br>(0.08,87.00)   | 0.92<br>(0.18,4.69)  | 1.65<br>(0.35,7.73)  | 1.57<br>(0.06,40.67) | 0.93<br>(0.32,2.73)  |
| 1.17<br>(0.29,4.69)  | 1.00<br>(0.22,4.45)  | 1.11<br>(0.31,3.92)  | 1.01<br>(0.19,5.45)  | 1.20<br>(0.26,5.42)  | 1.20<br>(0.32,7.28)  | 3.48<br>(0.15,82.91)  | 1.07<br>(0.85,1.35)  | 0.95<br>(0.48,1.85)  | 1.93<br>(0.67,5.52)  | 1.63<br>(0.53,5.02)  | 1.59<br>(0.39,6.47)  | 1.23<br>(0.25,5.92)  | Aripiprazole_OS      | 3.20<br>(0.14,74.77)   | 1.13<br>(0.68,1.89)  | 2.03<br>(1.40,2.95)  | 1.93<br>(0.10,36.06) | 1.15<br>(0.24,5.41)  |
| 0.36<br>(0.01,11.26) | 0.31<br>(0.01,10.04) | 0.35<br>(0.01,11.16) | 0.32<br>(0.01,11.1)  | 0.37<br>(0.01,12.13) | 0.47<br>(0.01,15.80) | 1.09<br>(0.77,1.54)   | 0.33<br>(0.01,7.72)  | 0.30<br>(0.01,7.39)  | 0.60<br>(0.02,16.63) | 0.51<br>(0.02,14.37) | 0.50<br>(0.02,15.43) | 0.38<br>(0.01,12.81) | 0.31<br>(0.01,7.29)  | Olanzapine_OS          | 0.35<br>(0.01,8.46)  | 0.63<br>(0.03,14.88) | 0.60<br>(0.01,44.34) | 0.36<br>(0.01,11.84) |
| 1.03<br>(0.24,4.39)  | 0.88<br>(0.19,4.15)  | 0.98<br>(0.26,3.70)  | 0.90<br>(0.16,5.05)  | 1.06<br>(0.22,5.06)  | 1.34<br>(0.27,6.78)  | 3.07<br>(0.13,74.95)  | 0.94<br>(0.60,1.49)  | 0.84<br>(0.36,1.93)  | 1.70<br>(0.53,5.41)  | 1.44<br>(0.42,4.91)  | 1.41<br>(0.33,6.06)  | 1.08<br>(0.21,5.51)  | 0.88<br>(0.53,1.47)  | 2.83<br>(0.12,67.60)   | Risperidone_OS       | 1.79<br>(1.04,3.08)  | 1.70<br>(0.09,33.16) | 1.01<br>(0.20,5.04)  |
| 0.57<br>(0.15,2.23)  | 0.49<br>(0.11,2.12)  | 0.54<br>(0.16,1.86)  | 0.50<br>(0.10,2.61)  | 0.59<br>(0.13,2.59)  | 0.75<br>(0.16,3.48)  | 1.71<br>(0.07,41.02)  | 0.53<br>(0.39,0.71)  | 0.47<br>(0.22,0.99)  | 0.95<br>(0.32,2.85)  | 0.80<br>(0.25,2.58)  | 0.78<br>(0.20,3.08)  | 0.60<br>(0.13,2.83)  | 0.49<br>(0.34,0.72)  | 1.58<br>(0.07,37.00)   | 0.56<br>(0.32,0.96)  | Quetiapine_OS        | 0.95<br>(0.05,18.06) | 0.56<br>(0.12,2.58)  |
| 0.61<br>(0.03,14.41) | 0.52<br>(0.02,12.90) | 0.57<br>(0.03,12.96) | 0.53<br>(0.02,14.37) | 0.62<br>(0.02,15.59) | 0.79<br>(0.03,20.34) | 1.80<br>(0.02,13.477) | 0.55<br>(0.03,10.41) | 0.49<br>(0.03,8.66)  | 1.00<br>(0.07,15.38) | 0.84<br>(0.05,13.36) | 0.83<br>(0.03,19.76) | 0.64<br>(0.02,16.50) | 0.52<br>(0.03,9.217) | 1.66<br>(0.02,12.217)  | 0.59<br>(0.03,11.43) | 1.05<br>(0.06,20.01) | Paliperidone_OS      | 0.59<br>(0.02,15.23) |
| 1.02<br>(0.51,2.03)  | 0.87<br>(0.34,2.22)  | 0.96<br>(0.39,2.36)  | 0.88<br>(0.24,3.32)  | 1.04<br>(0.41,2.66)  | 1.33<br>(0.47,3.76)  | 3.04<br>(0.09,10.215) | 0.93<br>(0.20,4.34)  | 0.82<br>(0.16,4.26)  | 1.68<br>(0.29,9.65)  | 1.42<br>(0.24,8.53)  | 1.39<br>(0.68,2.83)  | 1.07<br>(0.37,3.14)  | 0.87<br>(0.18,4.30)  | 2.79<br>(0.08,92.92)   | 0.99<br>(0.20,4.92)  | 1.77<br>(0.39,8.10)  | 1.68<br>(0.07,43.12) | DBP_OS               |

Net league table: head-to-head comparisons. Relative risks (RRs) and 95% confidence intervals (CIs) are reported. RRs lower than 1 favour the column-defining treatment. Statistically significant results are highlighted in grey. LAI=long-acting antipsychotics

### Evaluation of heterogeneity and incoherence

Overall heterogeneity

Estimated between-studies SD: 1.597e-09

Overall incoherence

Design-by-treatment test: P = 1.000

Loop-specific approach

- \* 7 triangular loops found
- \* 2 quadratic loops found

Note: Heterogeneity of loop B-C-E cannot be estimated due to insufficient observations - set equal to 0

Note: Heterogeneity of loop C-H-J-Q cannot be estimated due to insufficient observations - set equal to 0

Note: Heterogeneity of loop H-I-J-N cannot be estimated due to insufficient observations - set equal to 0

Evaluation of inconsistency using loop-specific heterogeneity estimates:

| Loop    | ROR   | z_value | p_value | CI_95         | Loop_Heterog_tau2 |
|---------|-------|---------|---------|---------------|-------------------|
| B-C-E   | 4.447 | 0.609   | 0.543   | (1.00,543.07) | 0.000             |
| A-C-F   | 2.804 | 0.855   | 0.393   | (1.00,29.80)  | 0.000             |
| A-C-E   | 1.858 | 0.441   | 0.659   | (1.00,29.22)  | 0.191             |
| H-I-J-N | 1.854 | 0.300   | 0.764   | (1.00,105.05) | 0.000             |
| A-B-E   | 1.592 | 0.220   | 0.826   | (1.00,100.10) | 0.078             |
| A-C-D   | 1.535 | 0.346   | 0.729   | (1.00,17.36)  | 0.058             |
| C-H-J-Q | 1.288 | 0.100   | 0.920   | (1.00,180.27) | 0.000             |
| A-B-C   | 1.238 | 0.217   | 0.829   | (1.00,8.53)   | 0.000             |
| A-C-M   | 1.072 | 0.061   | 0.952   | (1.00,10.20)  | 0.058             |

Consistency between direct and indirect estimates

| Side  | Direct    |           | Indirect  |           | Difference |           |       |
|-------|-----------|-----------|-----------|-----------|------------|-----------|-------|
|       | Coef.     | Std. Err. | Coef.     | Std. Err. | Coef.      | Std. Err. | P> z  |
| A B   | -.1223495 | .3518231  | -.3533029 | .8195693  | .2309534   | .8918931  | 0.796 |
| A C   | .069867   | .3708522  | -.2595601 | .47745    | .3294271   | .6045576  | 0.586 |
| A D   | -.3541718 | .8548109  | .0373133  | .781748   | -.3914852  | 1.158375  | 0.735 |
| A E   | -.01653   | .342528   | .3937474  | 1.045543  | -.4102774  | 1.10022   | 0.709 |
| A F   | .1375501  | .428048   | 1.107555  | 1.106727  | -.9700052  | 1.186621  | 0.414 |
| A L   | .         | .         | .         | .         | .          | .         | .     |
| A M   | .0791682  | .469746   | -.0660813 | .9547911  | .1452495   | 1.06409   | 0.891 |
| A S   | .         | .         | .         | .         | .          | .         | .     |
| B C   | .4054664  | .8416246  | .0126336  | .463968   | .3928327   | .96104    | 0.683 |
| B E   | -.3448405 | 1.974718  | .2104188  | .4626801  | -.5552593  | 2.028197  | 0.784 |
| C D   | .0645394  | .7204495  | -.3269396 | .9070779  | .391479    | 1.158379  | 0.735 |
| C E   | .7419366  | 1.18422   | -.0193933 | .4517686  | .7613299   | 1.267466  | 0.548 |
| C F   | 1.098594  | 1.064568  | .1284307  | .5243876  | .9701635   | 1.186716  | 0.414 |
| C J   | -.0192932 | 1.409658  | .7966775  | .911484   | -.8159707  | 1.678672  | 0.627 |
| C M   | -8.65e-13 | .904534   | .1452568  | .5605005  | -.1452568  | 1.064116  | 0.891 |
| C Q   | .7444332  | .6872804  | -.068567  | 1.52715   | .8130002   | 1.674736  | 0.627 |
| G O * | -.0838234 | .1790732  | 2.021396  | 129.4811  | -2.105219  | 129.4812  | 0.987 |
| H J   | .1251631  | 1.968377  | .629788   | .5665171  | -.5046249  | 2.04828   | 0.805 |
| H N   | -.0600594 | .1200442  | -.8308081 | 1.366021  | .7707487   | 1.371285  | 0.574 |
| H O * | 1.09861   | 1.603561  | .0381843  | 63.09444  | 1.060426   | 63.11587  | 0.987 |
| H P * | .0588381  | .2319802  | .4212608  | 69.61447  | -.3624227  | 69.61489  | 0.996 |
| H Q   | .6359887  | .1506275  | 1.449101  | 1.668464  | -.8131127  | 1.675249  | 0.627 |
| I J   | .8067543  | .4792522  | .0356451  | 1.28508   | .7711092   | 1.37154   | 0.574 |
| I N   | .0043956  | .3529052  | .7753998  | 1.325239  | -.7710042  | 1.371422  | 0.574 |
| J K * | -.1708376 | .2073171  | -1.012741 | 207.8029  | .8419035   | 207.8029  | 0.997 |
| J R * | -8.66e-12 | 1.394433  | -1.004045 | 374.0756  | 1.004045   | 374.0782  | 0.998 |

\* Warning: all the evidence about these contrasts comes from the trials which directly compare them.

Funnel plot

Not applicable: no comparisons with 10 one more studies.

## Supplement J - Sensitivity analysis: relapse (excluding trials with less than 50 participants AND published before 1990)

### Treatment codes

|                    |   |
|--------------------|---|
| Placebo            | A |
| Fluphenazine LAI   | B |
| Flupenthixol LAI   | C |
| Haloperidol LAI    | D |
| Zuclopenthixol LAI | E |
| Pipothiazine LAI   | F |
| Olanzapine LAI     | G |
| Risperidone LAI    | H |
| Aripiprazole LAI   | I |
| Paliperidone LAI-1 | J |
| Paliperidone LAI-3 | K |
| Haloperidol OS     | L |
| Aripiprazole OS    | M |
| Olanzapine OS      | N |
| Risperidone OS     | O |
| Quetiapine OS      | P |
| Paliperidone OS    | Q |

### Network map

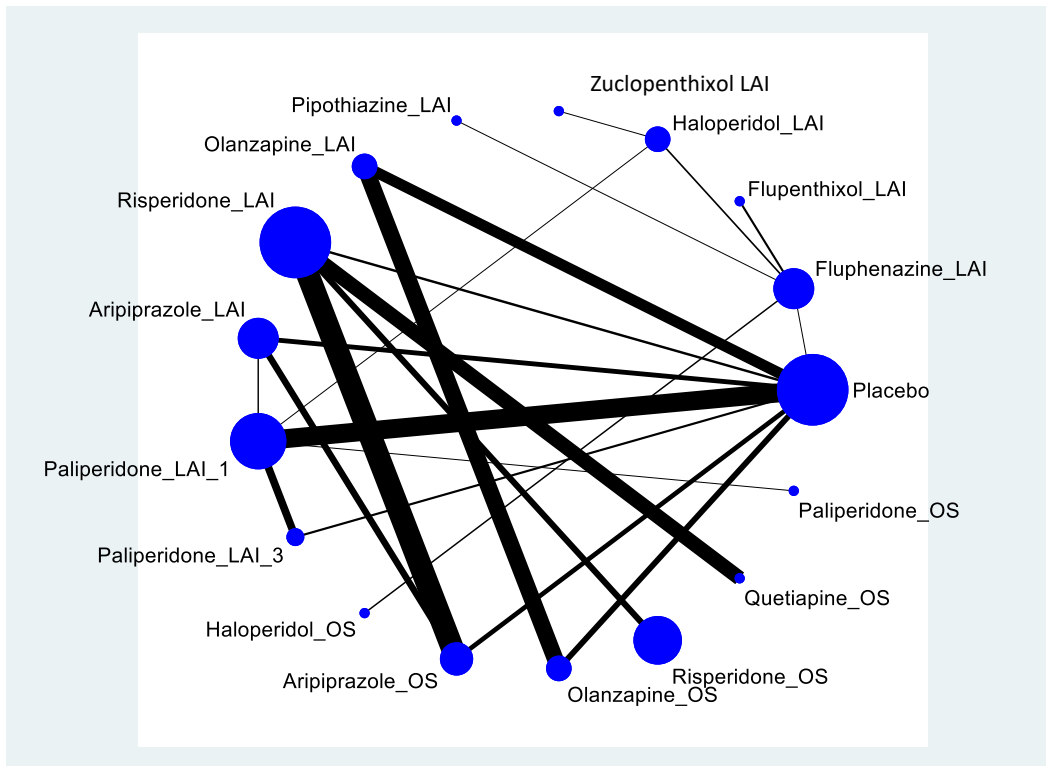

### Pairwise meta-analysis

|   | Study | ES    | [95% Conf. Interval] |        |
|---|-------|-------|----------------------|--------|
|   | O - H |       |                      |        |
| 1 |       | 0.994 | 0.324                | 3.049  |
| 2 |       | 0.333 | 0.037                | 2.991  |
| 3 |       | 7.000 | 1.692                | 28.960 |
| 4 |       | 0.901 | 0.450                | 1.806  |

|       |               |       |       |         |
|-------|---------------|-------|-------|---------|
| 5     |               | 0.974 | 0.063 | 14.998  |
| 58    |               | 0.817 | 0.319 | 2.091   |
|       | Sub-total     |       |       |         |
|       | D+L pooled ES | 1.127 | 0.583 | 2.177   |
| ----- |               |       |       |         |
|       | I - A         |       |       |         |
| 6     |               | 0.375 | 0.225 | 0.626   |
|       | Sub-total     |       |       |         |
|       | D+L pooled ES | 0.375 | 0.225 | 0.626   |
| ----- |               |       |       |         |
|       | M - A         |       |       |         |
| 6     |               | 0.357 | 0.212 | 0.601   |
|       | Sub-total     |       |       |         |
|       | D+L pooled ES | 0.357 | 0.212 | 0.601   |
| ----- |               |       |       |         |
|       | M - I         |       |       |         |
| 6     |               | 0.951 | 0.536 | 1.687   |
| 7     |               | 1.004 | 0.503 | 2.006   |
|       | Sub-total     |       |       |         |
|       | D+L pooled ES | 0.972 | 0.625 | 1.512   |
| ----- |               |       |       |         |
|       | G - A         |       |       |         |
| 8     |               | 0.389 | 0.277 | 0.546   |
|       | Sub-total     |       |       |         |
|       | D+L pooled ES | 0.389 | 0.277 | 0.546   |
| ----- |               |       |       |         |
|       | N - A         |       |       |         |
| 8     |               | 0.245 | 0.153 | 0.391   |
|       | Sub-total     |       |       |         |
|       | D+L pooled ES | 0.245 | 0.153 | 0.391   |
| ----- |               |       |       |         |
|       | N - G         |       |       |         |
| 8     |               | 0.629 | 0.400 | 0.990   |
| 9     |               | 0.920 | 0.647 | 1.306   |
|       | Sub-total     |       |       |         |
|       | D+L pooled ES | 0.782 | 0.542 | 1.130   |
| ----- |               |       |       |         |
|       | L - B         |       |       |         |
| 15    |               | 1.082 | 0.431 | 2.718   |
|       | Sub-total     |       |       |         |
|       | D+L pooled ES | 1.082 | 0.431 | 2.718   |
| ----- |               |       |       |         |
|       | P - H         |       |       |         |
| 17    |               | 1.889 | 1.406 | 2.538   |
|       | Sub-total     |       |       |         |
|       | D+L pooled ES | 1.889 | 1.406 | 2.538   |
| ----- |               |       |       |         |
|       | M - H         |       |       |         |
| 18    |               | 0.942 | 0.744 | 1.192   |
|       | Sub-total     |       |       |         |
|       | D+L pooled ES | 0.942 | 0.744 | 1.192   |
| ----- |               |       |       |         |
|       | J - I         |       |       |         |
| 23    |               | 1.007 | 0.020 | 50.403  |
| 24    |               | 2.353 | 0.894 | 6.192   |
|       | Sub-total     |       |       |         |
|       | D+L pooled ES | 2.241 | 0.876 | 5.732   |
| ----- |               |       |       |         |
|       | J - A         |       |       |         |
| 28    |               | 0.368 | 0.264 | 0.511   |
| 54    |               | 0.455 | 0.299 | 0.691   |
|       | Sub-total     |       |       |         |
|       | D+L pooled ES | 0.399 | 0.308 | 0.517   |
| ----- |               |       |       |         |
|       | H - A         |       |       |         |
| 29    |               | 0.349 | 0.170 | 0.718   |
|       | Sub-total     |       |       |         |
|       | D+L pooled ES | 0.349 | 0.170 | 0.718   |
| ----- |               |       |       |         |
|       | Q - J         |       |       |         |
| 32    |               | 1.000 | 0.065 | 15.380  |
|       | Sub-total     |       |       |         |
|       | D+L pooled ES | 1.000 | 0.065 | 15.380  |
| ----- |               |       |       |         |
|       | F - B         |       |       |         |
| 33    |               | 8.224 | 0.453 | 149.154 |
|       | Sub-total     |       |       |         |
|       | D+L pooled ES | 8.224 | 0.453 | 149.154 |

|               |  |       |              |
|---------------|--|-------|--------------|
| -----         |  |       |              |
| K - A         |  |       |              |
| 34            |  | 0.141 | 0.066 0.303  |
| Sub-total     |  |       |              |
| D+L pooled ES |  | 0.141 | 0.066 0.303  |
| -----         |  |       |              |
| B - A         |  |       |              |
| 38            |  | 0.125 | 0.017 0.932  |
| Sub-total     |  |       |              |
| D+L pooled ES |  | 0.125 | 0.017 0.932  |
| -----         |  |       |              |
| J - D         |  |       |              |
| 49            |  | 0.981 | 0.062 15.543 |
| Sub-total     |  |       |              |
| D+L pooled ES |  | 0.981 | 0.062 15.543 |
| -----         |  |       |              |
| K - J         |  |       |              |
| 59            |  | 0.843 | 0.561 1.266  |
| Sub-total     |  |       |              |
| D+L pooled ES |  | 0.843 | 0.561 1.266  |
| -----         |  |       |              |
| C - B         |  |       |              |
| 62            |  | 0.857 | 0.395 1.859  |
| Sub-total     |  |       |              |
| D+L pooled ES |  | 0.857 | 0.395 1.859  |
| -----         |  |       |              |
| E - D         |  |       |              |
| 63            |  | 1.067 | 0.260 4.378  |
| Sub-total     |  |       |              |
| D+L pooled ES |  | 1.067 | 0.260 4.378  |
| -----         |  |       |              |
| D - B         |  |       |              |
| 74            |  | 1.611 | 0.672 3.861  |
| Sub-total     |  |       |              |
| D+L pooled ES |  | 1.611 | 0.672 3.861  |
| -----         |  |       |              |

Test(s) of heterogeneity:

|       | Heterogeneity<br>statistic | degrees of<br>freedom | P     | I-squared** | Tau-squared |
|-------|----------------------------|-----------------------|-------|-------------|-------------|
| O - H | 8.38                       | 5                     | 0.137 | 40.3%       | 0.2517      |
| I - A | 0.00                       | 0                     | .     | .%          | 0.0000      |
| M - A | 0.00                       | 0                     | .     | .%          | 0.0000      |
| M - I | 0.01                       | 1                     | 0.905 | 0.0%        | 0.0000      |
| G - A | 0.00                       | 0                     | .     | .%          | 0.0000      |
| N - A | 0.00                       | 0                     | .     | .%          | 0.0000      |
| N - G | 1.68                       | 1                     | 0.194 | 40.6%       | 0.0293      |
| L - B | 0.00                       | 0                     | .     | .%          | 0.0000      |
| P - H | 0.00                       | 0                     | .     | .%          | 0.0000      |
| M - H | 0.00                       | 0                     | .     | .%          | 0.0000      |
| J - I | 0.17                       | 1                     | 0.680 | 0.0%        | 0.0000      |
| J - A | 0.61                       | 1                     | 0.434 | 0.0%        | 0.0000      |
| H - A | 0.00                       | 0                     | .     | .%          | 0.0000      |
| Q - J | 0.00                       | 0                     | .     | .%          | 0.0000      |
| F - B | 0.00                       | 0                     | .     | .%          | 0.0000      |
| K - A | 0.00                       | 0                     | .     | .%          | 0.0000      |
| B - A | 0.00                       | 0                     | .     | .%          | 0.0000      |
| J - D | 0.00                       | 0                     | .     | .%          | 0.0000      |
| K - J | 0.00                       | 0                     | .     | .%          | 0.0000      |
| C - B | 0.00                       | 0                     | .     | .%          | 0.0000      |
| E - D | 0.00                       | 0                     | .     | .%          | 0.0000      |
| D - B | 0.00                       | 0                     | .     | .%          | 0.0000      |

\*\* I-squared: the variation in ES attributable to heterogeneity)

### Net league table

|                     |                     |                     |                      |                       |                      |                      |                      |                      |                      |                      |                     |                      |                      |                      |                      |                      |
|---------------------|---------------------|---------------------|----------------------|-----------------------|----------------------|----------------------|----------------------|----------------------|----------------------|----------------------|---------------------|----------------------|----------------------|----------------------|----------------------|----------------------|
| Fluphenazine_LAI    | 0.86<br>(0.38,1.92) | 1.68<br>(0.70,4.02) | 1.79<br>(0.34,9.57)  | 8.22<br>(0.45,150.41) | 2.34<br>(0.42,12.93) | 2.23<br>(0.40,12.53) | 2.01<br>(0.36,11.22) | 2.48<br>(0.47,13.22) | 1.69<br>(0.30,9.49)  | 6.43<br>(1.22,33.91) | 1.08<br>(0.42,2.79) | 2.09<br>(0.33,11.67) | 1.85<br>(0.33,10.36) | 2.38<br>(0.40,14.23) | 4.21<br>(0.72,24.61) | 2.48<br>(0.10,61.64) |
| 1.17<br>(0.52,2.61) | Flupenthixol_LAI    | 1.96<br>(0.60,6.43) | 2.09<br>(0.33,13.42) | 9.59<br>(0.47,195.76) | 2.73<br>(0.41,18.06) | 2.60<br>(0.39,17.48) | 2.34<br>(0.35,15.65) | 2.90<br>(0.45,18.53) | 1.98<br>(0.30,13.23) | 7.50<br>(1.18,47.58) | 1.26<br>(0.36,4.38) | 2.44<br>(0.37,16.29) | 2.16<br>(0.32,14.45) | 2.77<br>(0.39,19.73) | 4.91<br>(0.70,34.20) | 2.90<br>(0.11,79.42) |
| 0.59<br>(0.25,1.42) | 0.51<br>(0.16,1.67) | Haloperidol_LAI     | 1.07<br>(0.26,4.45)  | 4.89<br>(0.24,101.61) | 1.39<br>(0.24,8.23)  | 1.32<br>(0.22,7.97)  | 1.19<br>(0.20,7.13)  | 1.48<br>(0.26,8.39)  | 1.01<br>(0.17,6.03)  | 3.82<br>(0.68,21.61) | 0.64<br>(0.18,2.33) | 1.24<br>(0.21,7.42)  | 1.10<br>(0.18,6.59)  | 1.41<br>(0.22,9.02)  | 2.50<br>(0.40,15.63) | 1.48<br>(0.06,37.94) |
| 0.56<br>(0.10,2.97) | 0.48<br>(0.07,3.06) | 0.94<br>(0.22,3.91) | Zuclophenthixol_LAI  | 4.58<br>(0.16,131.15) | 1.30<br>(0.13,12.76) | 1.24<br>(0.13,12.31) | 1.12<br>(0.11,11.04) | 1.38<br>(0.15,13.13) | 0.94<br>(0.10,9.32)  | 3.58<br>(0.38,33.85) | 0.60<br>(0.09,4.13) | 1.17<br>(0.12,11.49) | 1.03<br>(0.10,10.19) | 1.32<br>(0.13,13.77) | 2.34<br>(0.23,23.95) | 1.38<br>(0.04,48.05) |
| 0.12<br>(0.01,2.22) | 0.10<br>(0.01,2.13) | 0.20<br>(0.01,4.25) | 0.22<br>(0.01,6.25)  | Pipothiazine_LAI      | 0.28<br>(0.01,8.29)  | 0.27<br>(0.01,7.96)  | 0.24<br>(0.01,7.15)  | 0.30<br>(0.01,8.63)  | 0.21<br>(0.01,6.04)  | 0.78<br>(0.03,22.25) | 0.13<br>(0.01,2.80) | 0.25<br>(0.01,7.45)  | 0.22<br>(0.01,6.59)  | 0.29<br>(0.01,8.78)  | 0.51<br>(0.02,15.34) | 0.30<br>(0.00,22.97) |

|                     |                     |                      |                      |                       |                      |                      |                      |                        |                        |                      |                      |                      |                      |                      |                      |                      |
|---------------------|---------------------|----------------------|----------------------|-----------------------|----------------------|----------------------|----------------------|------------------------|------------------------|----------------------|----------------------|----------------------|----------------------|----------------------|----------------------|----------------------|
| 0.43<br>(0.08,2.36) | 0.37<br>(0.06,2.42) | 0.72<br>(0.12,4.25)  | 0.77<br>(0.08,7.50)  | 3.51<br>(0.12,102.27) | Olanzapin<br>e_LAI   | 0.95<br>(0.52,1.75)  | 0.86<br>(0.47,1.55)  | 1.06<br>(0.66,1.72)    | 0.72<br>(0.39,1.33)    | 2.75<br>(1.86,4.06)  | 0.46<br>(0.07,3.26)  | 0.89<br>(0.50,1.60)  | 0.79<br>(0.57,1.09)  | 1.02<br>(0.47,2.19)  | 1.80<br>(0.88,3.66)  | 1.06<br>(0.07,17.17) |
| 0.45<br>(0.08,2.53) | 0.38<br>(0.06,2.59) | 0.76<br>(0.13,4.55)  | 0.81<br>(0.08,7.99)  | 3.69<br>(0.13,108.56) | 1.05<br>(0.57,1.93)  | Risperido<br>ne_LAI  | 0.90<br>(0.54,1.50)  | 1.12<br>(0.65,1.91)    | 0.76<br>(0.39,1.47)    | 2.89<br>(1.80,4.63)  | 0.49<br>(0.07,3.48)  | 0.94<br>(0.69,1.27)  | 0.83<br>(0.43,1.58)  | 1.07<br>(0.67,1.71)  | 1.89<br>(1.31,2.73)  | 1.12<br>(0.07,18.23) |
| 0.50<br>(0.09,2.79) | 0.43<br>(0.06,2.86) | 0.84<br>(0.14,5.02)  | 0.89<br>(0.09,8.83)  | 4.10<br>(0.14,120.12) | 1.17<br>(0.65,2.11)  | 1.11<br>(0.67,1.85)  | Aripipraz<br>ole_LAI | 1.24<br>(0.75,2.05)    | 0.84<br>(0.46,1.57)    | 3.20<br>(2.03,5.05)  | 0.54<br>(0.08,3.85)  | 1.04<br>(0.67,1.62)  | 0.92<br>(0.49,1.72)  | 1.18<br>(0.59,2.38)  | 2.10<br>(1.12,3.93)  | 1.24<br>(0.08,20.12) |
| 0.40<br>(0.08,2.14) | 0.34<br>(0.05,2.20) | 0.68<br>(0.12,3.85)  | 0.72<br>(0.08,6.85)  | 3.31<br>(0.12,94.58)  | 0.94<br>(0.58,1.52)  | 0.90<br>(0.52,1.53)  | 0.81<br>(0.49,1.34)  | Paliperidon<br>e_LAI_1 | 0.68<br>(0.44,1.07)    | 2.59<br>(1.96,3.42)  | 0.44<br>(0.06,2.97)  | 0.84<br>(0.51,1.39)  | 0.74<br>(0.44,1.27)  | 0.96<br>(0.47,1.95)  | 1.69<br>(0.88,3.25)  | 1.00<br>(0.06,15.52) |
| 0.59<br>(0.11,3.30) | 0.51<br>(0.08,3.38) | 0.99<br>(0.17,5.94)  | 1.06<br>(0.11,10.45) | 4.85<br>(0.17,142.25) | 1.38<br>(0.75,2.54)  | 1.31<br>(0.68,2.53)  | 1.18<br>(0.64,2.20)  | 1.47<br>(0.94,2.29)    | Paliperidon<br>e_LAI_3 | 3.79<br>(2.33,6.17)  | 0.64<br>(0.09,4.56)  | 1.24<br>(0.66,2.31)  | 1.09<br>(0.58,2.05)  | 1.40<br>(0.62,3.17)  | 2.48<br>(1.17,5.27)  | 1.47<br>(0.09,23.59) |
| 0.16<br>(0.03,0.82) | 0.13<br>(0.02,0.85) | 0.26<br>(0.05,1.48)  | 0.28<br>(0.03,2.64)  | 1.28<br>(0.04,36.41)  | 0.36<br>(0.25,0.54)  | 0.35<br>(0.22,0.56)  | 0.31<br>(0.20,0.49)  | 0.39<br>(0.29,0.51)    | 0.26<br>(0.16,0.43)    | Placebo              | 0.17<br>(0.02,1.14)  | 0.33<br>(0.21,0.50)  | 0.29<br>(0.18,0.45)  | 0.37<br>(0.19,0.72)  | 0.65<br>(0.36,1.19)  | 0.39<br>(0.02,6.08)  |
| 0.92<br>(0.36,2.38) | 0.79<br>(0.23,2.74) | 1.55<br>(0.43,5.63)  | 1.66<br>(0.24,11.35) | 7.60<br>(0.36,161.50) | 2.16<br>(0.31,15.26) | 2.06<br>(0.29,14.76) | 1.85<br>(0.26,13.22) | 2.30<br>(0.34,15.67)   | 1.57<br>(0.22,11.17)   | 5.94<br>(0.88,40.25) | Haloperid<br>ol_OS   | 1.93<br>(0.27,13.76) | 1.71<br>(0.24,12.20) | 2.20<br>(0.29,16.64) | 3.89<br>(0.52,28.84) | 2.30<br>(0.08,65.29) |
| 0.48<br>(0.09,2.66) | 0.41<br>(0.06,2.73) | 0.80<br>(0.13,4.79)  | 0.86<br>(0.09,8.44)  | 3.93<br>(0.13,114.89) | 1.12<br>(0.63,2.00)  | 1.06<br>(0.78,1.44)  | 0.96<br>(0.62,1.49)  | 1.19<br>(0.72,1.96)    | 0.81<br>(0.43,1.51)    | 3.07<br>(1.99,4.75)  | 0.52<br>(0.07,3.67)  | Aripipraz<br>ole_OS  | 0.88<br>(0.48,1.64)  | 1.14<br>(0.65,1.99)  | 2.01<br>(1.25,3.24)  | 1.19<br>(0.07,19.27) |
| 0.54<br>(0.10,3.04) | 0.46<br>(0.07,3.11) | 0.91<br>(0.15,5.47)  | 0.97<br>(0.10,9.62)  | 4.45<br>(0.15,130.66) | 1.27<br>(0.91,1.76)  | 1.21<br>(0.63,2.30)  | 1.09<br>(0.58,2.03)  | 1.35<br>(0.79,2.29)    | 0.92<br>(0.49,1.73)    | 3.48<br>(2.21,5.48)  | 0.59<br>(0.08,4.19)  | 1.13<br>(0.61,2.10)  | Olanzapin<br>e_OS    | 1.29<br>(0.58,2.88)  | 2.28<br>(1.08,4.79)  | 1.35<br>(0.08,21.97) |
| 0.42<br>(0.07,2.52) | 0.36<br>(0.05,2.57) | 0.71<br>(0.11,4.52)  | 0.75<br>(0.07,7.84)  | 3.46<br>(0.11,105.02) | 0.98<br>(0.46,2.13)  | 0.94<br>(0.58,1.50)  | 0.84<br>(0.42,1.70)  | 1.05<br>(0.51,2.13)    | 0.71<br>(0.32,1.61)    | 2.70<br>(1.39,5.25)  | 0.46<br>(0.06,3.45)  | 0.88<br>(0.50,1.55)  | 0.78<br>(0.35,1.74)  | Risperido<br>ne_OS   | 1.77<br>(0.97,3.22)  | 1.05<br>(0.06,17.76) |
| 0.24<br>(0.04,1.39) | 0.20<br>(0.03,1.42) | 0.40<br>(0.06,2.50)  | 0.43<br>(0.04,4.36)  | 1.95<br>(0.07,58.63)  | 0.56<br>(0.27,1.13)  | 0.53<br>(0.37,0.77)  | 0.48<br>(0.25,0.89)  | 0.59<br>(0.31,1.13)    | 0.40<br>(0.19,0.86)    | 1.53<br>(0.84,2.78)  | 0.26<br>(0.03,1.91)  | 0.50<br>(0.31,0.80)  | 0.44<br>(0.21,0.92)  | 0.57<br>(0.31,1.03)  | Quetiapin<br>e_OS    | 0.59<br>(0.04,9.89)  |
| 0.40<br>(0.02,9.98) | 0.34<br>(0.01,9.45) | 0.68<br>(0.03,17.39) | 0.72<br>(0.02,25.06) | 3.31<br>(0.04,251.61) | 0.94<br>(0.06,15.25) | 0.90<br>(0.05,14.65) | 0.81<br>(0.05,13.12) | 1.00<br>(0.06,15.52)   | 0.68<br>(0.04,10.98)   | 2.59<br>(0.16,40.71) | 0.44<br>(0.02,12.39) | 0.84<br>(0.05,13.69) | 0.74<br>(0.05,12.15) | 0.96<br>(0.06,16.25) | 1.69<br>(0.06,16.25) | Paliperido<br>ne_OS  |

Net league table: head-to-head comparisons. Relative risks (RRs) and 95% confidence intervals (CIs) are reported. RRs lower than 1 favour the column-defining treatment. Statistically significant results are highlighted in grey. LAI=long-acting antipsychotics

### Evaluation of heterogeneity and incoherence

#### Overall heterogeneity

Estimated between-studies SD: .112541

#### Overall incoherence

Design-by-treatment test: P = 0.387

#### Loop-specific approach

\* 5 triangular loops found

\* 1 quadratic loops found

Note: Heterogeneity of loop A-G-N cannot be estimated due to insufficient observations - set equal to 0

Note: Heterogeneity of loop A-H-M cannot be estimated due to insufficient observations - set equal to 0

Note: Heterogeneity of loop A-I-M cannot be estimated due to insufficient observations - set equal to 0

Note: Heterogeneity of loop A-J-K cannot be estimated due to insufficient observations - set equal to 0

Note: Heterogeneity of loop A-B-D-J cannot be estimated due to insufficient observations - set equal to 0

Evaluation of inconsistency using loop-specific heterogeneity estimates:

| Loop    | ROR   | z_value | p_value | CI_95        | Loop_Heterog_tau2 |
|---------|-------|---------|---------|--------------|-------------------|
| A-J-K   | 2.384 | 1.886   | 0.059   | (1.00,5.88)  | 0.000             |
| A-I-J   | 2.107 | 1.327   | 0.185   | (1.00,6.34)  | 0.000             |
| A-B-D-J | 2.019 | 0.389   | 0.697   | (1.00,69.28) | 0.000             |
| A-G-N   | 1.462 | 1.099   | 0.272   | (1.00,2.88)  | 0.000             |
| A-H-M   | 1.084 | 0.171   | 0.864   | (1.00,2.72)  | 0.000             |
| A-I-M   | 1.056 | 0.106   | 0.915   | (1.00,2.89)  | 0.000             |

#### Consistency between direct and indirect estimates

| Side  | Direct Coef.     | Std. Err.       | Indirect Coef.   | Std. Err.       | Difference Coef. | Std. Err.       | P> z         |
|-------|------------------|-----------------|------------------|-----------------|------------------|-----------------|--------------|
| A B   | -2.079442        | 1.031909        | -1.401059        | 1.49319         | -.6783828        | 1.815063        | 0.709        |
| A G * | -.9436086        | .1729205        | -1.70245         | .5653683        | .7588411         | .5847102        | 0.194        |
| A H   | -1.051352        | .4089094        | -1.080577        | .3621541        | .0292254         | .5462257        | 0.957        |
| A I   | -.9790029        | .2920479        | -1.493714        | .386439         | .5147116         | .48534          | 0.289        |
| A J   | -.9111086        | .1655705        | -1.135525        | .3640385        | .2244161         | .3969316        | 0.572        |
| A K   | <b>-1.959192</b> | <b>.3897856</b> | <b>-1.052308</b> | <b>.2436256</b> | <b>-.9068842</b> | <b>.4596588</b> | <b>0.049</b> |
| A M   | -1.013619        | .3127978        | -1.292157        | .3738619        | .2785375         | .4885923        | 0.569        |
| A N * | -1.406917        | .2392438        | -.6479241        | .487486         | -.7589929        | .5847162        | 0.194        |
| B C * | -.1541507        | .4106304        | 3.710421         | 94.28845        | -3.864572        | 94.2891         | 0.967        |
| B D   | .476942          | .4612617        | 1.151803         | 1.756536        | -.6748606        | 1.816092        | 0.710        |



|       |                  |                 |                 |                 |                 |                 |              |
|-------|------------------|-----------------|-----------------|-----------------|-----------------|-----------------|--------------|
| B F * | 2.107073         | 1.482828        | 2.700803        | 291.3945        | -.5937298       | 291.4044        | 0.998        |
| B L * | .0791682         | .4830381        | 3.717493        | 238.5309        | -3.638325       | 238.5315        | 0.988        |
| D E * | .0645385         | .7291856        | 2.671941        | 178.947         | -2.607402       | 178.9489        | 0.988        |
| D J   | -.0192932        | 1.414584        | .6540286        | 1.138854        | -.6733218       | 1.81605         | 0.711        |
| G N   | .                | .               | .               | .               | .               | .               | .            |
| H M   | -.0600596        | .2163115        | -.0897547       | .5016216        | .029695         | .5462736        | 0.957        |
| H O * | .065139          | .2405328        | 2.349802        | 69.48517        | -2.284663       | 69.48562        | 0.974        |
| H P * | .6359888         | .1880302        | 2.020268        | 119.0986        | -1.384279       | 119.0988        | 0.991        |
| I J   | .8053495         | .4866935        | .0076949        | .2840737        | .7976546        | .5631031        | 0.157        |
| I M   | -.0286047        | .2515612        | .6041349        | .6958259        | -.6327396       | .7395872        | 0.392        |
| J K   | <b>-.1708379</b> | <b>.2073171</b> | <b>-1.07771</b> | <b>.4102506</b> | <b>.9068719</b> | <b>.4596584</b> | <b>0.049</b> |
| J Q * | -2.07e-10        | 1.398967        | 1.901034        | 374.0399        | -1.901034       | 374.0425        | 0.996        |

\* Warning: all the evidence about these contrasts comes from the trials which directly compare them.

#### Funnel plot

Not applicable: no comparisons with 10 or more studies.

## Supplement K - Sensitivity analysis: relapse (excluding trials with a high risk of bias - three or more RoB items at “high risk”)

### Treatment codes

|                      |   |
|----------------------|---|
| Placebo              | A |
| Fluphenazine LAI     | B |
| Flupenthixol LAI     | C |
| Haloperidol LAI      | D |
| (Zu)clopenthixol LAI | E |
| Pipothiazine LAI     | F |
| Bromperidol LAI      | G |
| Olanzapine LAI       | H |
| Risperidone LAI      | I |
| Aripiprazole LAI     | J |
| Paliperidone LAI-1   | K |
| Paliperidone LAI-3   | L |
| Phenothiazines OS    | M |
| Haloperidol OS       | N |
| Aripiprazole OS      | O |
| Olanzapine OS        | P |
| Risperidone OS       | Q |
| Paliperidone OS      | R |
| DBP_OS               | S |

### Network map

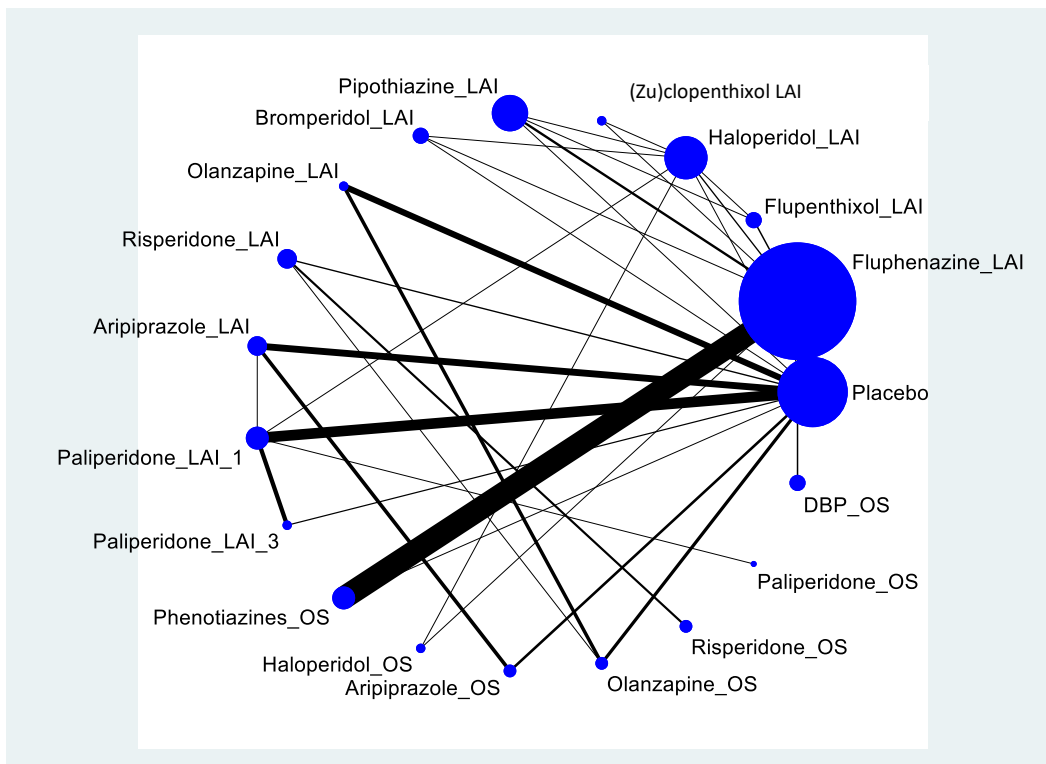

### Pairwise meta-analysis

| Study | ES    | [95% Conf. Interval] |       |
|-------|-------|----------------------|-------|
| 1     | 0.994 | 0.324                | 3.049 |

|       |               |       |       |         |
|-------|---------------|-------|-------|---------|
| 2     |               | 0.333 | 0.037 | 2.991   |
| 4     |               | 0.901 | 0.450 | 1.806   |
|       | Sub-total     |       |       |         |
|       | D+L pooled ES | 0.864 | 0.489 | 1.529   |
| ----- |               |       |       |         |
|       | J - A         |       |       |         |
| 6     |               | 0.375 | 0.225 | 0.626   |
| 39    |               | 0.254 | 0.168 | 0.384   |
|       | Sub-total     |       |       |         |
|       | D+L pooled ES | 0.299 | 0.205 | 0.437   |
| ----- |               |       |       |         |
|       | O - A         |       |       |         |
| 6     |               | 0.357 | 0.212 | 0.601   |
|       | Sub-total     |       |       |         |
|       | D+L pooled ES | 0.357 | 0.212 | 0.601   |
| ----- |               |       |       |         |
|       | O - J         |       |       |         |
| 6     |               | 0.951 | 0.536 | 1.687   |
| 7     |               | 1.004 | 0.503 | 2.006   |
|       | Sub-total     |       |       |         |
|       | D+L pooled ES | 0.972 | 0.625 | 1.512   |
| ----- |               |       |       |         |
|       | H - A         |       |       |         |
| 8     |               | 0.389 | 0.277 | 0.546   |
|       | Sub-total     |       |       |         |
|       | D+L pooled ES | 0.389 | 0.277 | 0.546   |
| ----- |               |       |       |         |
|       | P - A         |       |       |         |
| 8     |               | 0.245 | 0.153 | 0.391   |
|       | Sub-total     |       |       |         |
|       | D+L pooled ES | 0.245 | 0.153 | 0.391   |
| ----- |               |       |       |         |
|       | P - H         |       |       |         |
| 8     |               | 0.629 | 0.400 | 0.990   |
|       | Sub-total     |       |       |         |
|       | D+L pooled ES | 0.629 | 0.400 | 0.990   |
| ----- |               |       |       |         |
|       | N - D         |       |       |         |
| 10    |               | 1.000 | 0.170 | 5.888   |
|       | Sub-total     |       |       |         |
|       | D+L pooled ES | 1.000 | 0.170 | 5.888   |
| ----- |               |       |       |         |
|       | M - B         |       |       |         |
| 11    |               | 1.293 | 1.034 | 1.616   |
| 12    |               | 1.232 | 0.225 | 6.759   |
| 13    |               | 1.600 | 1.089 | 2.351   |
| 14    |               | 1.310 | 0.833 | 2.058   |
| 19    |               | 7.500 | 0.438 | 128.401 |
|       | Sub-total     |       |       |         |
|       | D+L pooled ES | 1.363 | 1.143 | 1.626   |
| ----- |               |       |       |         |
|       | B - A         |       |       |         |
| 12    |               | 0.128 | 0.033 | 0.494   |
| 35    |               | 0.333 | 0.041 | 2.686   |
| 37    |               | 0.123 | 0.040 | 0.375   |
| 38    |               | 0.125 | 0.017 | 0.932   |
| 45    |               | 0.444 | 0.187 | 1.055   |
| 67    |               | 0.143 | 0.022 | 0.910   |
| 76    |               | 0.500 | 0.234 | 1.068   |
|       | Sub-total     |       |       |         |
|       | D+L pooled ES | 0.265 | 0.155 | 0.451   |
| ----- |               |       |       |         |
|       | M - A         |       |       |         |
| 12    |               | 0.157 | 0.052 | 0.475   |
|       | Sub-total     |       |       |         |
|       | D+L pooled ES | 0.157 | 0.052 | 0.475   |
| ----- |               |       |       |         |
|       | N - B         |       |       |         |
| 15    |               | 1.082 | 0.431 | 2.718   |
|       | Sub-total     |       |       |         |
|       | D+L pooled ES | 1.082 | 0.431 | 2.718   |
| ----- |               |       |       |         |
|       | F - C         |       |       |         |
| 20    |               | 0.708 | 0.015 | 33.972  |
|       | Sub-total     |       |       |         |
|       | D+L pooled ES | 0.708 | 0.015 | 33.972  |
| ----- |               |       |       |         |
|       | C - B         |       |       |         |

|               |  |        |       |         |
|---------------|--|--------|-------|---------|
| 21            |  | 1.000  | 0.219 | 4.564   |
| 62            |  | 0.857  | 0.395 | 1.859   |
| Sub-total     |  |        |       |         |
| D+L pooled ES |  | 0.885  | 0.444 | 1.763   |
| -----         |  |        |       |         |
| K - J         |  |        |       |         |
| 24            |  | 2.353  | 0.894 | 6.192   |
| Sub-total     |  |        |       |         |
| D+L pooled ES |  | 2.353  | 0.894 | 6.192   |
| -----         |  |        |       |         |
| D - B         |  |        |       |         |
| 25            |  | 0.167  | 0.022 | 1.255   |
| 46            |  | 1.034  | 0.068 | 15.773  |
| 47            |  | 0.909  | 0.020 | 41.676  |
| 55            |  | 0.688  | 0.045 | 10.417  |
| 74            |  | 1.611  | 0.672 | 3.861   |
| Sub-total     |  |        |       |         |
| D+L pooled ES |  | 1.010  | 0.455 | 2.240   |
| -----         |  |        |       |         |
| D - C         |  |        |       |         |
| 26            |  | 1.500  | 0.288 | 7.807   |
| Sub-total     |  |        |       |         |
| D+L pooled ES |  | 1.500  | 0.288 | 7.807   |
| -----         |  |        |       |         |
| G - B         |  |        |       |         |
| 27            |  | 1.043  | 0.393 | 2.770   |
| 56            |  | 1.500  | 0.291 | 7.731   |
| Sub-total     |  |        |       |         |
| D+L pooled ES |  | 1.147  | 0.496 | 2.655   |
| -----         |  |        |       |         |
| K - A         |  |        |       |         |
| 28            |  | 0.368  | 0.264 | 0.511   |
| 54            |  | 0.455  | 0.299 | 0.691   |
| Sub-total     |  |        |       |         |
| D+L pooled ES |  | 0.399  | 0.308 | 0.517   |
| -----         |  |        |       |         |
| I - A         |  |        |       |         |
| 29            |  | 0.349  | 0.170 | 0.718   |
| Sub-total     |  |        |       |         |
| D+L pooled ES |  | 0.349  | 0.170 | 0.718   |
| -----         |  |        |       |         |
| G - A         |  |        |       |         |
| 30            |  | 1.000  | 0.022 | 46.053  |
| Sub-total     |  |        |       |         |
| D+L pooled ES |  | 1.000  | 0.022 | 46.053  |
| -----         |  |        |       |         |
| D - A         |  |        |       |         |
| 31            |  | 25.000 | 1.605 | 389.347 |
| Sub-total     |  |        |       |         |
| D+L pooled ES |  | 25.000 | 1.605 | 389.347 |
| -----         |  |        |       |         |
| R - K         |  |        |       |         |
| 32            |  | 1.000  | 0.065 | 15.380  |
| Sub-total     |  |        |       |         |
| D+L pooled ES |  | 1.000  | 0.065 | 15.380  |
| -----         |  |        |       |         |
| F - B         |  |        |       |         |
| 33            |  | 8.224  | 0.453 | 149.154 |
| 51            |  | 1.000  | 0.363 | 2.751   |
| 53            |  | 0.467  | 0.089 | 2.454   |
| 64            |  | 0.365  | 0.079 | 1.678   |
| 68            |  | 5.000  | 0.259 | 96.587  |
| 73            |  | 3.000  | 0.350 | 25.678  |
| 76            |  | 0.750  | 0.296 | 1.900   |
| Sub-total     |  |        |       |         |
| D+L pooled ES |  | 0.920  | 0.500 | 1.693   |
| -----         |  |        |       |         |
| L - A         |  |        |       |         |
| 34            |  | 0.141  | 0.066 | 0.303   |
| Sub-total     |  |        |       |         |
| D+L pooled ES |  | 0.141  | 0.066 | 0.303   |
| -----         |  |        |       |         |
| S - B         |  |        |       |         |
| 43            |  | 1.059  | 0.247 | 4.544   |
| 44            |  | 1.071  | 0.258 | 4.455   |
| 52            |  | 0.800  | 0.238 | 2.692   |
| 61            |  | 1.118  | 0.259 | 4.815   |
| Sub-total     |  |        |       |         |

|               |       |       |        |
|---------------|-------|-------|--------|
| D+L pooled ES | 0.982 | 0.493 | 1.954  |
| -----         |       |       |        |
| P - I         |       |       |        |
| 48 Sub-total  | 3.000 | 0.129 | 69.515 |
| D+L pooled ES | 3.000 | 0.129 | 69.515 |
| -----         |       |       |        |
| K - D         |       |       |        |
| 49 Sub-total  | 0.981 | 0.062 | 15.543 |
| D+L pooled ES | 0.981 | 0.062 | 15.543 |
| -----         |       |       |        |
| F - D         |       |       |        |
| 50 Sub-total  | 2.100 | 0.206 | 21.391 |
| D+L pooled ES | 2.100 | 0.206 | 21.391 |
| -----         |       |       |        |
| G - D         |       |       |        |
| 57 Sub-total  | 3.000 | 0.372 | 24.171 |
| D+L pooled ES | 3.000 | 0.372 | 24.171 |
| -----         |       |       |        |
| L - K         |       |       |        |
| 59 Sub-total  | 0.843 | 0.561 | 1.266  |
| D+L pooled ES | 0.843 | 0.561 | 1.266  |
| -----         |       |       |        |
| E - D         |       |       |        |
| 63 Sub-total  | 1.067 | 0.260 | 4.378  |
| D+L pooled ES | 1.067 | 0.260 | 4.378  |
| -----         |       |       |        |
| F - A         |       |       |        |
| 76 Sub-total  | 0.375 | 0.159 | 0.884  |
| D+L pooled ES | 0.375 | 0.159 | 0.884  |
| -----         |       |       |        |
| E - B         |       |       |        |
| 77 Sub-total  | 0.702 | 0.131 | 3.748  |
| D+L pooled ES | 0.702 | 0.131 | 3.748  |
| -----         |       |       |        |

Test(s) of heterogeneity:

|       | Heterogeneity<br>statistic | degrees of<br>freedom | P     | I-squared** | Tau-squared |
|-------|----------------------------|-----------------------|-------|-------------|-------------|
| Q - I | 0.80                       | 2                     | 0.671 | 0.0%        | 0.0000      |
| J - A | 1.35                       | 1                     | 0.246 | 25.7%       | 0.0196      |
| O - A | 0.00                       | 0                     | .     | .%          | 0.0000      |
| O - J | 0.01                       | 1                     | 0.905 | 0.0%        | 0.0000      |
| H - A | 0.00                       | 0                     | .     | .%          | 0.0000      |
| P - A | 0.00                       | 0                     | .     | .%          | 0.0000      |
| P - H | 0.00                       | 0                     | .     | .%          | 0.0000      |
| N - D | 0.00                       | 0                     | .     | .%          | 0.0000      |
| M - B | 2.31                       | 4                     | 0.679 | 0.0%        | 0.0000      |
| B - A | 7.85                       | 6                     | 0.249 | 23.6%       | 0.1191      |
| M - A | 0.00                       | 0                     | .     | .%          | 0.0000      |
| N - B | 0.00                       | 0                     | .     | .%          | 0.0000      |
| F - C | 0.00                       | 0                     | .     | .%          | 0.0000      |
| C - B | 0.03                       | 1                     | 0.859 | 0.0%        | 0.0000      |
| K - J | 0.00                       | 0                     | .     | .%          | 0.0000      |
| D - B | 4.21                       | 4                     | 0.378 | 5.0%        | 0.0583      |
| D - C | 0.00                       | 0                     | .     | .%          | 0.0000      |
| G - B | 0.14                       | 1                     | 0.709 | 0.0%        | 0.0000      |
| K - A | 0.61                       | 1                     | 0.434 | 0.0%        | 0.0000      |
| I - A | 0.00                       | 0                     | .     | .%          | 0.0000      |
| G - A | 0.00                       | 0                     | .     | .%          | 0.0000      |
| D - A | 0.00                       | 0                     | .     | .%          | 0.0000      |
| R - K | 0.00                       | 0                     | .     | .%          | 0.0000      |
| F - B | 6.87                       | 6                     | 0.333 | 12.7%       | 0.0878      |
| L - A | 0.00                       | 0                     | .     | .%          | 0.0000      |
| S - B | 0.16                       | 3                     | 0.983 | 0.0%        | 0.0000      |
| P - I | 0.00                       | 0                     | .     | .%          | 0.0000      |
| K - D | 0.00                       | 0                     | .     | .%          | 0.0000      |
| F - D | 0.00                       | 0                     | .     | .%          | 0.0000      |
| G - D | 0.00                       | 0                     | .     | .%          | 0.0000      |
| L - K | 0.00                       | 0                     | .     | .%          | 0.0000      |

E - D 0.00 0 . .% 0.0000  
 F - A 0.00 0 . .% 0.0000  
 E - B 0.00 0 . .% 0.0000  
 \*\* I-squared: the variation in ES attributable to heterogeneity)

**Net league table**

|                     |                     |                     |                     |                     |                      |                      |                      |                      |                      |                      |                      |                      |                      |                      |                      |                      |                      |                      |
|---------------------|---------------------|---------------------|---------------------|---------------------|----------------------|----------------------|----------------------|----------------------|----------------------|----------------------|----------------------|----------------------|----------------------|----------------------|----------------------|----------------------|----------------------|----------------------|
| Fluphenazine_LAI    | 0.88<br>(0.47,1.66) | 1.16<br>(0.67,2.01) | 0.98<br>(0.32,3.01) | 1.04<br>(0.63,1.73) | 1.39<br>(0.65,2.99)  | 1.36<br>(0.81,2.28)  | 1.13<br>(0.50,2.51)  | 0.97<br>(0.60,1.59)  | 1.33<br>(0.84,2.10)  | 0.93<br>(0.53,1.63)  | 3.46<br>(2.34,5.11)  | 1.33<br>(1.12,1.59)  | 1.10<br>(0.48,2.51)  | 1.06<br>(0.59,1.90)  | 0.87<br>(0.48,1.60)  | 0.97<br>(0.36,2.61)  | 1.33<br>(0.08,2.12)  | 0.98<br>(0.49,1.95)  |
| 1.14<br>(0.60,2.14) | Flupentixol_LAI     | 1.31<br>(0.60,2.88) | 1.11<br>(0.31,3.96) | 1.19<br>(0.53,2.64) | 1.58<br>(0.59,4.25)  | 1.55<br>(0.49,3.48)  | 1.28<br>(0.46,3.55)  | 1.11<br>(0.50,2.46)  | 1.51<br>(0.70,3.32)  | 1.06<br>(0.46,2.46)  | 3.94<br>(1.88,8.24)  | 1.52<br>(0.79,2.95)  | 1.25<br>(0.45,3.50)  | 1.21<br>(0.51,2.84)  | 0.99<br>(0.41,2.38)  | 1.11<br>(0.34,3.56)  | 1.51<br>(0.09,25.91) | 1.12<br>(0.44,2.85)  |
| 0.87<br>(0.50,1.50) | 0.76<br>(0.35,1.67) | Haloperidol_LAI     | 0.84<br>(0.28,2.55) | 0.90<br>(0.44,1.86) | 1.20<br>(0.49,2.96)  | 1.18<br>(0.56,2.45)  | 0.97<br>(0.37,2.54)  | 0.84<br>(0.41,1.73)  | 1.15<br>(0.58,2.30)  | 0.81<br>(0.38,1.74)  | 2.99<br>(1.56,5.75)  | 1.15<br>(0.65,2.06)  | 0.95<br>(0.38,2.40)  | 0.92<br>(0.42,2.01)  | 0.76<br>(0.34,1.68)  | 0.84<br>(0.28,2.57)  | 1.15<br>(0.07,19.28) | 0.85<br>(0.35,2.05)  |
| 1.03<br>(0.33,3.16) | 0.90<br>(0.25,3.22) | 1.18<br>(0.39,3.57) | Zuclopenthixol_LAI  | 1.07<br>(0.31,3.65) | 1.42<br>(0.37,5.47)  | 1.39<br>(0.41,4.78)  | 1.15<br>(0.29,4.58)  | 1.00<br>(0.29,3.39)  | 1.36<br>(0.41,4.56)  | 0.96<br>(0.44,1.88)  | 3.55<br>(1.08,11.60) | 1.37<br>(0.44,4.28)  | 1.13<br>(0.29,4.43)  | 1.09<br>(0.31,3.84)  | 0.89<br>(0.25,3.20)  | 1.00<br>(0.22,4.43)  | 1.36<br>(0.07,27.04) | 1.01<br>(0.27,3.77)  |
| 0.96<br>(0.58,1.59) | 0.84<br>(0.38,1.88) | 1.11<br>(0.54,2.29) | 0.94<br>(0.27,3.19) | Pipothiazine_LAI    | 1.33<br>(0.53,3.33)  | 1.30<br>(0.66,2.55)  | 1.08<br>(0.43,2.69)  | 0.93<br>(0.49,1.80)  | 1.27<br>(0.68,2.31)  | 0.89<br>(0.44,1.88)  | 3.32<br>(1.85,5.93)  | 1.28<br>(0.75,2.19)  | 1.05<br>(0.40,2.76)  | 1.02<br>(0.49,2.10)  | 0.84<br>(0.40,1.73)  | 1.03<br>(0.32,2.73)  | 1.27<br>(0.08,21.05) | 0.94<br>(0.40,2.22)  |
| 0.72<br>(0.33,1.55) | 0.63<br>(0.29,1.70) | 0.83<br>(0.34,2.04) | 0.70<br>(0.18,2.69) | 0.75<br>(0.30,1.88) | Bromperidol_LAI      | 0.98<br>(0.39,2.44)  | 0.81<br>(0.27,2.44)  | 0.70<br>(0.28,1.73)  | 0.96<br>(0.40,2.33)  | 0.67<br>(0.26,1.72)  | 2.49<br>(1.06,5.83)  | 0.96<br>(0.44,2.11)  | 0.79<br>(0.26,2.42)  | 0.76<br>(0.29,2.98)  | 0.63<br>(0.24,2.66)  | 0.70<br>(0.20,2.42)  | 0.96<br>(0.05,16.90) | 0.71<br>(0.25,1.98)  |
| 0.74<br>(0.44,1.23) | 0.65<br>(0.29,1.46) | 0.85<br>(0.41,1.78) | 0.72<br>(0.21,2.46) | 0.77<br>(0.30,1.50) | Olanzapine_LAI       | 1.02<br>(0.41,2.56)  | 0.83<br>(0.38,1.80)  | 0.72<br>(0.46,1.13)  | 0.98<br>(0.65,1.44)  | 0.69<br>(0.41,1.18)  | 2.55<br>(1.82,3.57)  | 0.98<br>(0.57,1.68)  | 0.81<br>(0.31,2.13)  | 0.78<br>(0.45,1.35)  | 0.64<br>(0.41,1.01)  | 0.72<br>(0.27,1.88)  | 0.98<br>(0.06,15.53) | 0.72<br>(0.31,1.71)  |
| 0.89<br>(0.40,1.98) | 0.78<br>(0.28,2.16) | 1.03<br>(0.39,3.68) | 0.87<br>(0.22,3.43) | 0.93<br>(0.39,2.30) | 1.23<br>(0.41,3.72)  | 1.21<br>(0.56,2.62)  | Risperidone_LAI      | 0.87<br>(0.40,1.86)  | 1.18<br>(0.56,2.48)  | 0.83<br>(0.37,1.86)  | 3.07<br>(1.52,6.20)  | 1.19<br>(0.52,2.68)  | 0.97<br>(0.31,3.07)  | 0.94<br>(0.41,2.15)  | 0.78<br>(0.34,1.78)  | 0.86<br>(0.49,1.53)  | 1.18<br>(0.07,20.04) | 0.87<br>(0.30,2.51)  |
| 1.03<br>(0.63,1.68) | 0.90<br>(0.41,2.00) | 1.19<br>(0.58,2.43) | 1.00<br>(0.29,3.40) | 1.07<br>(0.56,2.06) | 1.43<br>(0.58,3.33)  | 1.39<br>(0.89,2.19)  | 1.16<br>(0.54,2.48)  | Aripiprazole_LAI     | 1.36<br>(0.94,1.97)  | 0.96<br>(0.58,1.57)  | 3.55<br>(2.63,4.93)  | 1.37<br>(0.82,2.29)  | 1.13<br>(0.43,2.93)  | 1.09<br>(0.72,1.65)  | 0.90<br>(0.52,1.56)  | 1.00<br>(0.39,2.59)  | 1.36<br>(0.09,21.35) | 1.01<br>(0.43,2.35)  |
| 0.75<br>(0.48,1.19) | 0.66<br>(0.30,1.44) | 0.87<br>(0.44,1.74) | 0.73<br>(0.22,2.45) | 0.78<br>(0.42,1.47) | 1.05<br>(0.43,2.53)  | 1.02<br>(0.67,1.55)  | 0.85<br>(0.40,1.78)  | 0.73<br>(0.51,1.06)  | Paliperidone_LAI_1   | 0.70<br>(0.49,1.01)  | 2.60<br>(2.05,3.31)  | 1.00<br>(0.62,1.62)  | 0.83<br>(0.32,2.11)  | 0.80<br>(0.49,1.30)  | 0.66<br>(0.39,1.11)  | 0.73<br>(0.29,1.87)  | 1.00<br>(0.07,15.38) | 0.74<br>(0.32,1.69)  |
| 1.07<br>(0.61,1.88) | 0.94<br>(0.41,2.19) | 1.24<br>(0.58,2.66) | 1.05<br>(0.30,3.65) | 1.12<br>(0.55,2.77) | 1.49<br>(0.58,3.82)  | 1.46<br>(0.86,2.47)  | 1.21<br>(0.54,2.71)  | 1.04<br>(0.64,1.71)  | 1.43<br>(0.99,2.05)  | Paliperidone_LAI_3   | 3.71<br>(2.47,5.56)  | 1.18<br>(0.80,2.58)  | 1.18<br>(0.44,3.81)  | 1.14<br>(0.63,2.05)  | 0.94<br>(0.51,1.73)  | 1.04<br>(0.39,2.81)  | 1.43<br>(0.09,22.45) | 1.05<br>(0.43,2.56)  |
| 0.29<br>(0.20,0.43) | 0.25<br>(0.12,0.53) | 0.33<br>(0.17,0.64) | 0.28<br>(0.09,0.92) | 0.30<br>(0.17,0.54) | 0.40<br>(0.17,0.94)  | 0.39<br>(0.28,0.55)  | 0.33<br>(0.16,0.66)  | 0.28<br>(0.21,0.38)  | 0.38<br>(0.30,0.49)  | 0.27<br>(0.18,0.40)  | Placebo              | 0.39<br>(0.25,0.59)  | 0.32<br>(0.13,0.79)  | 0.31<br>(0.20,0.47)  | 0.25<br>(0.16,0.40)  | 0.28<br>(0.11,0.70)  | 0.38<br>(0.02,5.97)  | 0.28<br>(0.13,0.63)  |
| 0.75<br>(0.63,0.89) | 0.66<br>(0.34,2.27) | 0.87<br>(0.49,1.54) | 0.73<br>(0.23,2.29) | 0.78<br>(0.46,1.34) | 1.04<br>(0.47,2.29)  | 1.02<br>(0.59,1.74)  | 0.84<br>(0.37,1.91)  | 0.73<br>(0.44,1.22)  | 1.00<br>(0.62,1.61)  | 0.70<br>(0.39,1.25)  | 2.59<br>(1.70,3.94)  | Phenothiazines_OS    | 0.82<br>(0.35,1.91)  | 0.79<br>(0.44,1.45)  | 0.65<br>(0.35,1.22)  | 0.73<br>(0.27,1.98)  | 1.00<br>(0.06,15.98) | 0.74<br>(0.36,1.50)  |
| 0.91<br>(0.40,2.08) | 0.80<br>(0.29,2.25) | 1.05<br>(0.42,2.66) | 0.89<br>(0.23,3.50) | 0.95<br>(0.36,2.50) | 1.27<br>(0.41,3.50)  | 1.24<br>(0.47,3.88)  | 1.03<br>(0.33,3.24)  | 0.89<br>(0.34,2.31)  | 1.21<br>(0.47,3.01)  | 0.85<br>(0.31,2.30)  | 3.15<br>(1.27,7.83)  | 1.22<br>(0.52,2.83)  | Haloperidol_OS       | 0.97<br>(0.35,2.65)  | 0.80<br>(0.29,2.21)  | 0.89<br>(0.25,3.20)  | 1.21<br>(0.07,21.79) | 0.89<br>(0.31,2.62)  |
| 0.94<br>(0.53,1.69) | 0.83<br>(0.35,1.95) | 1.09<br>(0.50,2.38) | 0.92<br>(0.26,3.25) | 0.98<br>(0.48,2.03) | 1.31<br>(0.50,3.40)  | 1.28<br>(0.74,2.22)  | 1.06<br>(0.47,2.42)  | 0.92<br>(0.61,1.39)  | 1.25<br>(0.77,2.04)  | 0.88<br>(0.49,1.58)  | 3.26<br>(2.12,5.03)  | 1.26<br>(0.69,2.30)  | 1.03<br>(0.38,2.83)  | Aripiprazole_OS      | 0.82<br>(0.44,1.55)  | 0.92<br>(0.34,2.50)  | 1.25<br>(0.08,20.13) | 0.93<br>(0.38,2.28)  |
| 1.15<br>(0.62,2.10) | 1.01<br>(0.42,2.41) | 1.32<br>(0.59,2.95) | 1.12<br>(0.31,3.99) | 1.19<br>(0.57,2.51) | 1.59<br>(0.60,4.44)  | 1.56<br>(0.99,2.44)  | 1.29<br>(0.56,2.95)  | 1.12<br>(0.64,1.94)  | 1.52<br>(0.90,2.57)  | 1.07<br>(0.58,1.98)  | 3.96<br>(2.49,6.30)  | 1.53<br>(0.82,2.86)  | 1.26<br>(0.45,3.49)  | Olanzapine_OS        | 1.11<br>(0.64,2.29)  | 1.11<br>(0.41,3.05)  | 1.52<br>(0.09,24.61) | 1.12<br>(0.45,2.81)  |
| 1.03<br>(0.38,2.75) | 0.90<br>(0.28,2.90) | 1.19<br>(0.39,3.62) | 1.00<br>(0.23,4.45) | 1.07<br>(0.37,3.14) | 1.43<br>(0.41,4.94)  | 1.40<br>(0.53,3.65)  | 1.16<br>(0.65,2.05)  | 1.00<br>(0.39,2.60)  | 1.37<br>(0.54,3.48)  | 0.96<br>(0.36,2.58)  | 3.55<br>(1.44,8.78)  | 1.37<br>(0.51,3.72)  | 1.13<br>(0.31,4.07)  | 1.09<br>(0.33,2.45)  | Risperidone_OS       | 1.37<br>(0.08,24.55) | 1.01<br>(0.30,3.35)  |                      |
| 0.75<br>(0.05,1.20) | 0.66<br>(0.04,1.13) | 0.87<br>(0.05,1.45) | 0.73<br>(0.04,1.45) | 0.78<br>(0.05,1.2)  | 1.05<br>(0.06,18.96) | 1.02<br>(0.06,16.21) | 0.85<br>(0.05,14.38) | 0.73<br>(0.05,11.56) | 1.00<br>(0.07,15.38) | 0.70<br>(0.04,11.05) | 2.60<br>(0.17,40.44) | 1.00<br>(0.06,16.10) | 0.83<br>(0.05,14.85) | 0.80<br>(0.05,12.81) | 0.66<br>(0.04,10.61) | 0.73<br>(0.04,13.16) | 1.37<br>(0.08,24.55) | 0.74<br>(0.04,12.83) |
| 1.01<br>(0.52,2.08) | 0.90<br>(0.35,2.28) | 1.18<br>(0.49,2.84) | 0.99<br>(0.27,3.72) | 1.06<br>(0.45,2.50) | 1.42<br>(0.51,3.96)  | 1.38<br>(0.59,3.40)  | 1.15<br>(0.30,3.31)  | 0.99<br>(0.43,2.9)   | 1.35<br>(0.59,3.09)  | 0.95<br>(0.39,2.31)  | 3.52<br>(1.60,7.77)  | 1.36<br>(0.67,2.76)  | 1.12<br>(0.38,3.27)  | 1.08<br>(0.44,2.66)  | 0.89<br>(0.36,2.22)  | 0.99<br>(0.30,3.30)  | 1.35<br>(0.08,23.52) | DBP_OS               |

Net league table: head-to-head comparisons. Relative risks (RRs) and 95% confidence intervals (CIs) are reported. RRs lower than 1 favour the column-defining treatment. Statistically significant results are highlighted in grey. LAI=long-acting antipsychotics

**Evaluation of heterogeneity and incoherence**

Overall heterogeneity  
 Estimated between-studies SD: 7.830e-09

Overall incoherence  
 Design-by-treatment test: P = 1.000

Loop-specific approach  
 \* 19 triangular loops found

- Note: Heterogeneity of loop A-D-F cannot be estimated due to insufficient observations - set equal to 0
- Note: Heterogeneity of loop A-D-G cannot be estimated due to insufficient observations - set equal to 0
- Note: Heterogeneity of loop A-D-K cannot be estimated due to insufficient observations - set equal to 0
- Note: Heterogeneity of loop A-H-P cannot be estimated due to insufficient observations - set equal to 0
- Note: Heterogeneity of loop A-I-P cannot be estimated due to insufficient observations - set equal to 0
- Note: Heterogeneity of loop A-J-O cannot be estimated due to insufficient observations - set equal to 0
- Note: Heterogeneity of loop A-K-L cannot be estimated due to insufficient observations - set equal to 0
- Note: Heterogeneity of loop C-D-F cannot be estimated due to insufficient observations - set equal to 0

Evaluation of inconsistency using loop-specific heterogeneity estimates:

| Loop  | ROR     | z_value | p_value | CI_95           | Loop_Heterog_tau2 |
|-------|---------|---------|---------|-----------------|-------------------|
| A-D-F | 140.000 | 2.620   | 0.009   | (3.47,5641.05)  | 0.000             |
| A-B-D | 96.901  | 2.997   | 0.003   | (4.87,1928.87)  | 0.108             |
| A-D-G | 75.000  | 1.642   | 0.101   | (1.00,12978.68) | 0.000             |
| A-D-K | 61.497  | 2.068   | 0.039   | (1.24,3049.36)  | 0.000             |
| C-D-F | 4.447   | 0.609   | 0.543   | (1.00,543.07)   | 0.000             |
| A-I-P | 4.281   | 0.875   | 0.382   | (1.00,111.32)   | 0.000             |
| A-B-G | 3.136   | 0.561   | 0.575   | (1.00,170.27)   | 0.056             |
| B-D-G | 2.804   | 0.855   | 0.393   | (1.00,29.80)    | 0.000             |
| A-B-M | 2.768   | 1.645   | 0.100   | (1.00,9.31)     | 0.000             |
| A-K-L | 2.384   | 1.886   | 0.059   | (1.00,5.88)     | 0.000             |
| B-D-F | 2.266   | 0.615   | 0.539   | (1.00,30.75)    | 0.080             |
| A-B-F | 1.922   | 1.035   | 0.301   | (1.00,6.63)     | 0.037             |
| A-J-K | 1.747   | 1.039   | 0.299   | (1.00,5.00)     | 0.000             |
| B-D-E | 1.535   | 0.346   | 0.729   | (1.00,17.36)    | 0.058             |
| B-C-F | 1.430   | 0.177   | 0.860   | (1.00,75.68)    | 0.000             |
| B-C-D | 1.238   | 0.217   | 0.829   | (1.00,8.53)     | 0.000             |
| A-J-O | 1.199   | 0.385   | 0.700   | (1.00,3.02)     | 0.000             |
| B-D-N | 1.072   | 0.061   | 0.952   | (1.00,10.20)    | 0.058             |
| A-H-P | .       | .       | .       | .               | 0.000             |

\*\*\* Note: Loop A-H-P is formed only by multi-arm trial(s) - Consistent by definition

Consistency between direct and indirect estimates

| Side         | Direct<br>Coef.  | Std. Err.       | Indirect<br>Coef. | Std. Err.       | Difference<br>Coef. | Std. Err.       | P> z         |
|--------------|------------------|-----------------|-------------------|-----------------|---------------------|-----------------|--------------|
| A B          | -1.3176          | .2217218        | -.7964143         | .597178         | -.5211861           | .660935         | 0.430        |
| <b>A D</b>   | <b>3.218876</b>  | <b>1.40084</b>  | <b>-1.354825</b>  | <b>.3432117</b> | <b>4.573701</b>     | <b>1.442272</b> | <b>0.002</b> |
| A F          | -.8679911        | .4288189        | -1.484512         | .39984          | .6165213            | .5777525        | 0.286        |
| A G          | -4.43e-10        | 1.954017        | -.9585664         | .4451671        | .9585664            | 2.004085        | 0.632        |
| A H *        | -.9436102        | .1729205        | 1.96495           | 3.318975        | -2.90856            | 3.324628        | 0.382        |
| A I          | -1.051352        | .3672006        | -2.502438         | 1.620364        | 1.451086            | 1.66145         | 0.382        |
| A J          | -1.212364        | .1644035        | -1.637552         | .4384192        | .4251876            | .4714677        | 0.367        |
| A K          | -.9193986        | .13217          | -1.183004         | .3275993        | .2636058            | .3532566        | 0.456        |
| <b>A L</b>   | <b>-1.959192</b> | <b>.3897856</b> | <b>-1.057646</b>  | <b>.2434306</b> | <b>-.9015459</b>    | <b>.4595555</b> | <b>0.050</b> |
| <b>A M</b>   | <b>-1.967112</b> | <b>.5330459</b> | <b>-.7354216</b>  | <b>.2376645</b> | <b>-1.23169</b>     | <b>.5923645</b> | <b>0.038</b> |
| A O          | -1.00917         | .264548         | -1.548131         | .3795289        | .5389613            | .4546235        | 0.236        |
| A P *        | -1.406914        | .2392441        | .0473665          | 1.645004        | -1.45428            | 1.66231         | 0.382        |
| B C          | -.1223549        | .3518231        | -.1644836         | .815            | .0421287            | .8876947        | 0.962        |
| B D          | .0698582         | .370851         | .2459501          | .4318631        | -.1760919           | .5692412        | 0.757        |
| B E          | -.3541851        | .8548104        | .2473125          | .7768712        | -.6014976           | 1.155085        | 0.603        |
| B F          | -.1151403        | .2774853        | .9987285          | .6512584        | -1.113869           | .6953969        | 0.109        |
| B G          | .137553          | .4280479        | 1.298208          | .9626536        | -1.160655           | 1.053533        | 0.271        |
| <b>B M *</b> | <b>.3097299</b>  | <b>.0898763</b> | <b>-1.862935</b>  | <b>1.000186</b> | <b>2.172665</b>     | <b>1.005923</b> | <b>0.031</b> |
| B N          | .0791688         | .469746         | .1501367          | .9506854        | -.070968            | 1.060408        | 0.947        |
| B S *        | -.0182145        | .3510965        | 2.485914          | 68.79844        | -2.504128           | 68.7993         | 0.971        |
| C D          | .4054838         | .8416246        | .2349792          | .4552073        | .1705046            | .9568412        | 0.859        |
| C F          | -.3448408        | 1.974718        | .1940146          | .4174234        | -.5388554           | 2.018354        | 0.789        |
| D E          | .0645448         | .7204495        | -.5367361         | .9028778        | .6012809            | 1.155093        | 0.603        |
| D F          | .7419588         | 1.18422         | -.1940669         | .3897116        | .9360257            | 1.246696        | 0.453        |
| D G          | 1.098687         | 1.064568        | -.0241836         | .5087098        | 1.122871            | 1.179873        | 0.341        |
| D K          | -.0192932        | 1.409658        | .1501387          | .3643968        | -.1694319           | 1.455995        | 0.907        |
| D N          | -5.42e-10        | .904534         | -.0707849         | .5534868        | .0707849            | 1.060438        | 0.947        |
| H P *        | -.4633034        | .2311041        | 2.445256          | 3.308328        | -2.90856            | 3.324622        | 0.382        |
| I P          | 1.098648         | 1.603561        | -.3556326         | .4382532        | 1.454281            | 1.662369        | 0.382        |
| I Q *        | -.1458003        | .2909682        | 2.279746          | 94.8934         | -2.425546           | 94.89368        | 0.980        |
| J K          | .855678          | .4936849        | .2176925          | .2039176        | .6379854            | .5341414        | 0.232        |
| J O *        | -.0280212        | .22519          | .871321           | .5878133        | -.8993422           | .6274168        | 0.152        |
| <b>K L</b>   | <b>-.1708379</b> | <b>.2073171</b> | <b>-1.072371</b>  | <b>.4101349</b> | <b>.9015336</b>     | <b>.4595552</b> | <b>0.050</b> |
| K R *        | 6.97e-11         | 1.394433        | 1.912598          | 374.2345        | -1.912598           | 374.2371        | 0.996        |

\* Warning: all the evidence about these contrasts comes from the trials which directly compare them.

Funnel plot

Not applicable: no comparisons with 10 one more studies.

## Supplement L - Primary outcome: acceptability (dropouts due to any reason)

### Treatment codes

|                      |   |
|----------------------|---|
| Placebo              | A |
| Fluphenazine LAI     | B |
| Flupenthixol LAI     | C |
| Haloperidol LAI      | D |
| (Zu)clopenthixol LAI | E |
| Pipothiazine LAI     | F |
| Bromperidol LAI      | G |
| Perphenazine LAI     | H |
| Olanzapine LAI       | I |
| Risperidone LAI      | J |
| Aripiprazole LAI     | K |
| Paliperidone LAI-1   | L |
| Paliperidone LAI-3   | M |
| Phenotiazines OS     | N |
| Haloperidol OS       | O |
| Aripiprazole OS      | P |
| Olanzapine OS        | Q |
| Risperidone OS       | R |
| Quetiapine OS        | S |
| Paliperidone OS      | T |
| DBP_OS               | U |

### Network map

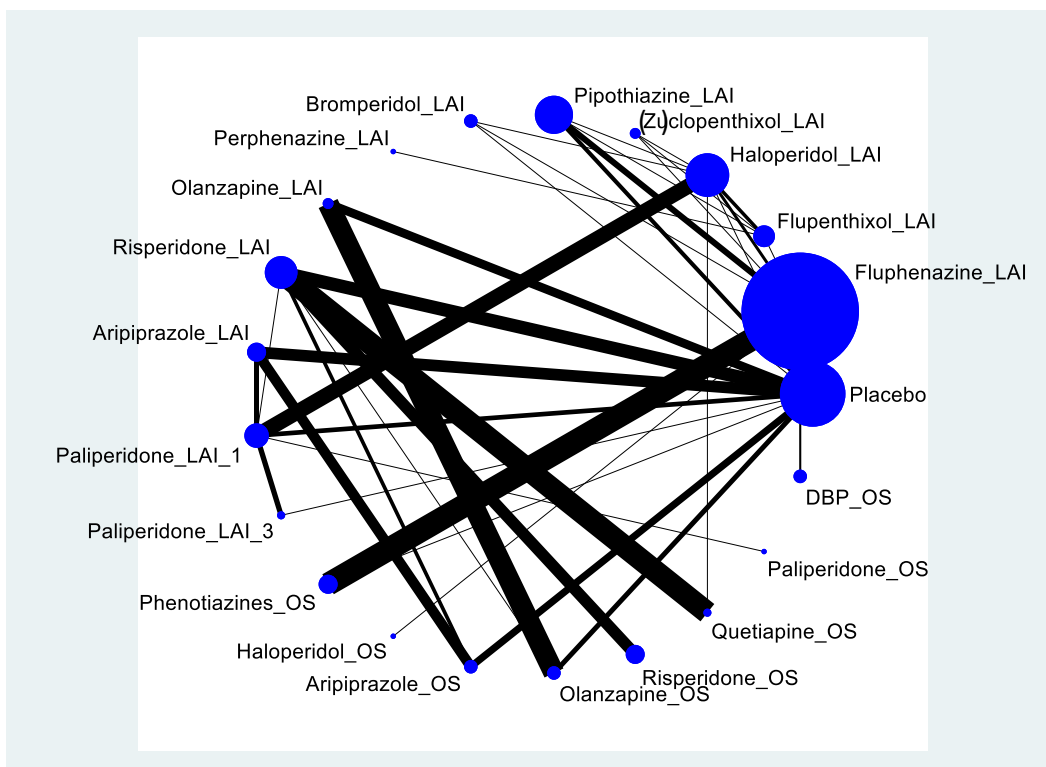

### Pairwise meta-analysis

| Study | ES    | [95% Conf. Interval] |
|-------|-------|----------------------|
| 1     | 0.789 | 0.563 1.105          |
| 2     | 0.091 | 0.005 1.562          |



|               |  |       |       |        |
|---------------|--|-------|-------|--------|
| 3             |  | 1.231 | 0.677 | 2.237  |
| 4             |  | 1.147 | 0.606 | 2.173  |
| 5             |  | 0.754 | 0.569 | 0.999  |
| 58            |  | 0.954 | 0.540 | 1.687  |
| Sub-total     |  |       |       |        |
| D+L pooled ES |  | 0.854 | 0.694 | 1.051  |
| -----         |  |       |       |        |
| K - A         |  |       |       |        |
| 6             |  | 0.487 | 0.376 | 0.631  |
| 39            |  | 0.457 | 0.353 | 0.592  |
| Sub-total     |  |       |       |        |
| D+L pooled ES |  | 0.472 | 0.393 | 0.567  |
| -----         |  |       |       |        |
| P - A         |  |       |       |        |
| 6             |  | 0.619 | 0.490 | 0.782  |
| Sub-total     |  |       |       |        |
| D+L pooled ES |  | 0.619 | 0.490 | 0.782  |
| -----         |  |       |       |        |
| P - K         |  |       |       |        |
| 6             |  | 1.271 | 0.974 | 1.657  |
| 7             |  | 1.294 | 0.972 | 1.722  |
| Sub-total     |  |       |       |        |
| D+L pooled ES |  | 1.281 | 1.055 | 1.556  |
| -----         |  |       |       |        |
| I - A         |  |       |       |        |
| 8             |  | 0.636 | 0.515 | 0.786  |
| Sub-total     |  |       |       |        |
| D+L pooled ES |  | 0.636 | 0.515 | 0.786  |
| -----         |  |       |       |        |
| Q - A         |  |       |       |        |
| 8             |  | 0.421 | 0.318 | 0.556  |
| Sub-total     |  |       |       |        |
| D+L pooled ES |  | 0.421 | 0.318 | 0.556  |
| -----         |  |       |       |        |
| Q - I         |  |       |       |        |
| 8             |  | 0.661 | 0.515 | 0.850  |
| 9             |  | 0.951 | 0.808 | 1.120  |
| Sub-total     |  |       |       |        |
| D+L pooled ES |  | 0.804 | 0.563 | 1.146  |
| -----         |  |       |       |        |
| N - B         |  |       |       |        |
| 11            |  | 0.932 | 0.464 | 1.870  |
| 12            |  | 0.442 | 0.212 | 0.922  |
| 13            |  | 1.272 | 0.963 | 1.679  |
| 14            |  | 1.097 | 0.939 | 1.281  |
| 19            |  | 2.471 | 0.588 | 10.381 |
| Sub-total     |  |       |       |        |
| D+L pooled ES |  | 1.050 | 0.794 | 1.388  |
| -----         |  |       |       |        |
| B - A         |  |       |       |        |
| 12            |  | 0.654 | 0.441 | 0.972  |
| 35            |  | 0.333 | 0.041 | 2.686  |
| 37            |  | 1.367 | 0.326 | 5.723  |
| 38            |  | 0.600 | 0.319 | 1.128  |
| 40            |  | 0.050 | 0.003 | 0.786  |
| 41            |  | 1.125 | 0.491 | 2.578  |
| 45            |  | 0.444 | 0.187 | 1.055  |
| 67            |  | 3.000 | 0.140 | 64.262 |
| 76            |  | 0.808 | 0.594 | 1.098  |
| Sub-total     |  |       |       |        |
| D+L pooled ES |  | 0.712 | 0.555 | 0.913  |
| -----         |  |       |       |        |
| N - A         |  |       |       |        |
| 12            |  | 0.289 | 0.149 | 0.562  |
| Sub-total     |  |       |       |        |
| D+L pooled ES |  | 0.289 | 0.149 | 0.562  |
| -----         |  |       |       |        |
| O - B         |  |       |       |        |
| 15            |  | 1.184 | 0.594 | 2.361  |
| Sub-total     |  |       |       |        |
| D+L pooled ES |  | 1.184 | 0.594 | 2.361  |
| -----         |  |       |       |        |
| S - D         |  |       |       |        |
| 16            |  | 1.263 | 0.622 | 2.566  |
| Sub-total     |  |       |       |        |
| D+L pooled ES |  | 1.263 | 0.622 | 2.566  |
| -----         |  |       |       |        |
| S - J         |  |       |       |        |

|       |               |       |       |        |
|-------|---------------|-------|-------|--------|
| 17    |               | 1.219 | 1.067 | 1.392  |
|       | Sub-total     |       |       |        |
|       | D+L pooled ES | 1.219 | 1.067 | 1.392  |
| ----- |               |       |       |        |
|       | P - J         |       |       |        |
| 18    |               | 0.959 | 0.693 | 1.329  |
|       | Sub-total     |       |       |        |
|       | D+L pooled ES | 0.959 | 0.693 | 1.329  |
| ----- |               |       |       |        |
|       | F - C         |       |       |        |
| 20    |               | 0.894 | 0.421 | 1.901  |
|       | Sub-total     |       |       |        |
|       | D+L pooled ES | 0.894 | 0.421 | 1.901  |
| ----- |               |       |       |        |
|       | C - B         |       |       |        |
| 21    |               | 0.750 | 0.183 | 3.068  |
| 62    |               | 0.714 | 0.292 | 1.749  |
| 66    |               | 0.063 | 0.004 | 1.039  |
|       | Sub-total     |       |       |        |
|       | D+L pooled ES | 0.562 | 0.217 | 1.461  |
| ----- |               |       |       |        |
|       | L - K         |       |       |        |
| 23    |               | 1.342 | 0.998 | 1.806  |
| 24    |               | 0.981 | 0.020 | 48.494 |
|       | Sub-total     |       |       |        |
|       | D+L pooled ES | 1.340 | 0.997 | 1.801  |
| ----- |               |       |       |        |
|       | D - B         |       |       |        |
| 25    |               | 1.143 | 0.519 | 2.519  |
| 46    |               | 1.034 | 0.285 | 3.752  |
| 47    |               | 4.545 | 0.247 | 83.699 |
| 55    |               | 0.529 | 0.284 | 0.984  |
| 60    |               | 0.635 | 0.210 | 1.921  |
| 72    |               | 1.667 | 0.483 | 5.757  |
| 74    |               | 1.611 | 0.672 | 3.861  |
|       | Sub-total     |       |       |        |
|       | D+L pooled ES | 0.961 | 0.631 | 1.463  |
| ----- |               |       |       |        |
|       | D - C         |       |       |        |
| 26    |               | 1.000 | 0.717 | 1.395  |
|       | Sub-total     |       |       |        |
|       | D+L pooled ES | 1.000 | 0.717 | 1.395  |
| ----- |               |       |       |        |
|       | G - B         |       |       |        |
| 27    |               | 3.130 | 0.702 | 13.954 |
| 56    |               | 1.500 | 0.291 | 7.731  |
|       | Sub-total     |       |       |        |
|       | D+L pooled ES | 2.242 | 0.743 | 6.766  |
| ----- |               |       |       |        |
|       | L - A         |       |       |        |
| 28    |               | 1.061 | 0.658 | 1.710  |
| 54    |               | 0.842 | 0.585 | 1.212  |
|       | Sub-total     |       |       |        |
|       | D+L pooled ES | 0.917 | 0.686 | 1.225  |
| ----- |               |       |       |        |
|       | J - A         |       |       |        |
| 29    |               | 0.740 | 0.623 | 0.878  |
|       | Sub-total     |       |       |        |
|       | D+L pooled ES | 0.740 | 0.623 | 0.878  |
| ----- |               |       |       |        |
|       | G - A         |       |       |        |
| 30    |               | 0.400 | 0.100 | 1.599  |
|       | Sub-total     |       |       |        |
|       | D+L pooled ES | 0.400 | 0.100 | 1.599  |
| ----- |               |       |       |        |
|       | D - A         |       |       |        |
| 31    |               | 0.040 | 0.003 | 0.623  |
| 36    |               | 0.359 | 0.161 | 0.804  |
|       | Sub-total     |       |       |        |
|       | D+L pooled ES | 0.180 | 0.024 | 1.329  |
| ----- |               |       |       |        |
|       | T - L         |       |       |        |
| 32    |               | 1.333 | 0.321 | 5.538  |
|       | Sub-total     |       |       |        |
|       | D+L pooled ES | 1.333 | 0.321 | 5.538  |
| ----- |               |       |       |        |
|       | F - B         |       |       |        |
| 33    |               | 2.007 | 0.747 | 5.391  |

|               |  |       |       |        |
|---------------|--|-------|-------|--------|
| 51            |  | 3.000 | 0.127 | 70.829 |
| 53            |  | 1.001 | 0.532 | 1.885  |
| 64            |  | 0.547 | 0.149 | 2.007  |
| 68            |  | 3.000 | 0.348 | 25.870 |
| 70            |  | 0.968 | 0.446 | 2.102  |
| 71            |  | 0.522 | 0.011 | 24.698 |
| 73            |  | 4.000 | 0.504 | 31.736 |
| 75            |  | 1.000 | 0.021 | 47.380 |
| 76            |  | 1.000 | 0.718 | 1.393  |
| Sub-total     |  |       |       |        |
| D+L pooled ES |  | 1.062 | 0.824 | 1.368  |
| -----         |  |       |       |        |
| M - A         |  |       |       |        |
| 34            |  | 0.473 | 0.244 | 0.916  |
| Sub-total     |  |       |       |        |
| D+L pooled ES |  | 0.473 | 0.244 | 0.916  |
| -----         |  |       |       |        |
| L - J         |  |       |       |        |
| 42            |  | 0.914 | 0.304 | 2.752  |
| Sub-total     |  |       |       |        |
| D+L pooled ES |  | 0.914 | 0.304 | 2.752  |
| -----         |  |       |       |        |
| U - B         |  |       |       |        |
| 43            |  | 1.412 | 0.369 | 5.403  |
| 44            |  | 0.893 | 0.350 | 2.279  |
| 52            |  | 0.786 | 0.429 | 1.441  |
| 61            |  | 1.118 | 0.390 | 3.203  |
| Sub-total     |  |       |       |        |
| D+L pooled ES |  | 0.911 | 0.591 | 1.406  |
| -----         |  |       |       |        |
| Q - J         |  |       |       |        |
| 48            |  | 1.125 | 0.546 | 2.318  |
| Sub-total     |  |       |       |        |
| D+L pooled ES |  | 1.125 | 0.546 | 2.318  |
| -----         |  |       |       |        |
| L - D         |  |       |       |        |
| 49            |  | 1.010 | 0.861 | 1.185  |
| Sub-total     |  |       |       |        |
| D+L pooled ES |  | 1.010 | 0.861 | 1.185  |
| -----         |  |       |       |        |
| F - D         |  |       |       |        |
| 50            |  | 1.050 | 0.163 | 6.757  |
| Sub-total     |  |       |       |        |
| D+L pooled ES |  | 1.050 | 0.163 | 6.757  |
| -----         |  |       |       |        |
| G - D         |  |       |       |        |
| 57            |  | 2.000 | 0.684 | 5.851  |
| Sub-total     |  |       |       |        |
| D+L pooled ES |  | 2.000 | 0.684 | 5.851  |
| -----         |  |       |       |        |
| M - L         |  |       |       |        |
| 59            |  | 0.905 | 0.690 | 1.187  |
| Sub-total     |  |       |       |        |
| D+L pooled ES |  | 0.905 | 0.690 | 1.187  |
| -----         |  |       |       |        |
| E - D         |  |       |       |        |
| 63            |  | 0.480 | 0.125 | 1.837  |
| Sub-total     |  |       |       |        |
| D+L pooled ES |  | 0.480 | 0.125 | 1.837  |
| -----         |  |       |       |        |
| E - C         |  |       |       |        |
| 65            |  | 0.429 | 0.122 | 1.502  |
| Sub-total     |  |       |       |        |
| D+L pooled ES |  | 0.429 | 0.122 | 1.502  |
| -----         |  |       |       |        |
| H - C         |  |       |       |        |
| 69            |  | 0.500 | 0.050 | 4.978  |
| Sub-total     |  |       |       |        |
| D+L pooled ES |  | 0.500 | 0.050 | 4.978  |
| -----         |  |       |       |        |
| F - A         |  |       |       |        |
| 76            |  | 0.808 | 0.594 | 1.098  |
| Sub-total     |  |       |       |        |
| D+L pooled ES |  | 0.808 | 0.594 | 1.098  |
| -----         |  |       |       |        |
| E - B         |  |       |       |        |
| 77            |  | 3.150 | 0.136 | 72.885 |
| Sub-total     |  |       |       |        |

D+L pooled ES | 3.150 0.136 72.885

Test(s) of heterogeneity:

|       | Heterogeneity<br>statistic | degrees of<br>freedom | P     | I-squared** | Tau-squared |
|-------|----------------------------|-----------------------|-------|-------------|-------------|
| R - J | 5.73                       | 5                     | 0.333 | 12.7%       | 0.0090      |
| K - A | 0.12                       | 1                     | 0.733 | 0.0%        | 0.0000      |
| P - A | 0.00                       | 0                     | .     | 0.0%        | 0.0000      |
| P - K | 0.01                       | 1                     | 0.927 | 0.0%        | 0.0000      |
| I - A | 0.00                       | 0                     | .     | 0.0%        | 0.0000      |
| Q - A | 0.00                       | 0                     | .     | 0.0%        | 0.0000      |
| Q - I | 5.65                       | 1                     | 0.017 | 82.3%       | 0.0543      |
| N - B | 8.39                       | 4                     | 0.078 | 52.3%       | 0.0430      |
| B - A | 9.12                       | 8                     | 0.332 | 12.3%       | 0.0180      |
| N - A | 0.00                       | 0                     | .     | 0.0%        | 0.0000      |
| O - B | 0.00                       | 0                     | .     | 0.0%        | 0.0000      |
| S - D | 0.00                       | 0                     | .     | 0.0%        | 0.0000      |
| S - J | 0.00                       | 0                     | .     | 0.0%        | 0.0000      |
| P - J | 0.00                       | 0                     | .     | 0.0%        | 0.0000      |
| F - C | 0.00                       | 0                     | .     | 0.0%        | 0.0000      |
| C - B | 2.73                       | 2                     | 0.256 | 26.6%       | 0.2085      |
| L - K | 0.02                       | 1                     | 0.875 | 0.0%        | 0.0000      |
| D - B | 7.43                       | 6                     | 0.283 | 19.2%       | 0.0612      |
| D - C | 0.00                       | 0                     | .     | 0.0%        | 0.0000      |
| G - B | 0.42                       | 1                     | 0.516 | 0.0%        | 0.0000      |
| L - A | 0.57                       | 1                     | 0.451 | 0.0%        | 0.0000      |
| J - A | 0.00                       | 0                     | .     | 0.0%        | 0.0000      |
| G - A | 0.00                       | 0                     | .     | 0.0%        | 0.0000      |
| D - A | 2.26                       | 1                     | 0.133 | 55.8%       | 1.3444      |
| T - L | 0.00                       | 0                     | .     | 0.0%        | 0.0000      |
| F - B | 5.82                       | 9                     | 0.757 | 0.0%        | 0.0000      |
| M - A | 0.00                       | 0                     | .     | 0.0%        | 0.0000      |
| L - J | 0.00                       | 0                     | .     | 0.0%        | 0.0000      |
| U - B | 0.78                       | 3                     | 0.853 | 0.0%        | 0.0000      |
| Q - J | 0.00                       | 0                     | .     | 0.0%        | 0.0000      |
| L - D | 0.00                       | 0                     | .     | 0.0%        | 0.0000      |
| F - D | 0.00                       | 0                     | .     | 0.0%        | 0.0000      |
| G - D | 0.00                       | 0                     | .     | 0.0%        | 0.0000      |
| M - L | 0.00                       | 0                     | .     | 0.0%        | 0.0000      |
| E - D | 0.00                       | 0                     | .     | 0.0%        | 0.0000      |
| E - C | 0.00                       | 0                     | .     | 0.0%        | 0.0000      |
| H - C | 0.00                       | 0                     | .     | 0.0%        | 0.0000      |
| F - A | 0.00                       | 0                     | .     | 0.0%        | 0.0000      |
| E - B | 0.00                       | 0                     | .     | 0.0%        | 0.0000      |

\*\* I-squared: the variation in ES attributable to heterogeneity)

**Net league table**

|                          |                         |                         |                         |                         |                         |                          |                          |                          |                         |                         |                             |                          |                         |                         |                         |                         |                         |                         |                         |                         |
|--------------------------|-------------------------|-------------------------|-------------------------|-------------------------|-------------------------|--------------------------|--------------------------|--------------------------|-------------------------|-------------------------|-----------------------------|--------------------------|-------------------------|-------------------------|-------------------------|-------------------------|-------------------------|-------------------------|-------------------------|-------------------------|
| Aripipr<br>azole_        | 2.10<br>(1.03,4.<br>28) | 1.27<br>(0.86,1.<br>88) | 1.37<br>(1.06,1.<br>76) | 1.30<br>(0.99,1.<br>71) | 1.26<br>(0.93,1.<br>71) | 1.43<br>(1.14,1.<br>79)  | 1.23<br>(0.87,1.<br>75)  | 0.64<br>(0.06,6.<br>05)  | 1.50<br>(1.09,2.<br>05) | 1.42<br>(1.11,1.<br>82) | 0.68<br>(0.27,1.7<br>3)     | 2.05<br>(1.71,2.<br>44)  | 1.48<br>(1.08,2.<br>01) | 1.62<br>(0.76,3.<br>43) | 1.30<br>(1.06,1.<br>59) | 1.07<br>(0.78,1.<br>46) | 1.21<br>(0.88,1.<br>66) | 1.73<br>(1.26,2.<br>36) | 1.91<br>(0.45,8.<br>13) | 1.25<br>(0.75,2.<br>08) |
| 0.48<br>(0.23,0.<br>.97) | Bromp<br>eridol_        | 0.61<br>(0.29,1.<br>28) | 0.65<br>(0.33,1.<br>29) | 0.62<br>(0.31,1.<br>24) | 0.60<br>(0.29,1.<br>25) | 0.68<br>(0.34,1.<br>37)  | 0.58<br>(0.28,1.<br>24)  | 0.30<br>(0.03,3.<br>41)  | 0.71<br>(0.35,1.<br>46) | 0.68<br>(0.33,1.<br>38) | 0.32<br>(0.10,1.0<br>0)     | 0.97<br>(0.49,1.<br>.94) | 0.70<br>(0.35,1.<br>43) | 0.77<br>(0.29,2.<br>06) | 0.62<br>(0.30,1.<br>26) | 0.51<br>(0.24,1.<br>06) | 0.57<br>(0.27,1.<br>21) | 0.82<br>(0.39,1.<br>71) | 0.91<br>(0.18,4.<br>47) | 0.59<br>(0.26,1.<br>35) |
| 0.79<br>(0.53,1.<br>.16) | 1.65<br>(0.78,3.<br>48) | Flupent<br>hixol_L      | 1.07<br>(0.76,1.<br>52) | 1.02<br>(0.75,1.<br>39) | 0.99<br>(0.64,1.<br>53) | 1.12<br>(0.78,1.<br>61)  | 0.97<br>(0.62,1.<br>51)  | 0.50<br>(0.05,5.<br>01)  | 1.18<br>(0.80,1.<br>73) | 1.12<br>(0.76,1.<br>65) | 0.54<br>(0.22,1.3<br>2)     | 1.61<br>(1.12,2.<br>30)  | 1.16<br>(0.79,1.<br>70) | 1.27<br>(0.58,2.<br>79) | 1.02<br>(0.68,1.<br>52) | 0.84<br>(0.54,1.<br>30) | 0.95<br>(0.48,1.<br>48) | 1.36<br>(0.89,2.<br>08) | 1.50<br>(0.34,6.<br>56) | 0.98<br>(0.56,1.<br>72) |
| 0.73<br>(0.57,0.<br>95)  | 1.54<br>(0.77,3.<br>07) | 0.93<br>(0.66,1.<br>32) | Fluphe<br>nazine_       | 0.95<br>(0.75,1.<br>21) | 0.92<br>(0.67,1.<br>26) | 1.05<br>(0.82,1.<br>34)  | 0.90<br>(0.63,1.<br>29)  | 0.47<br>(0.05,4.<br>79)  | 1.10<br>(0.86,1.<br>40) | 1.04<br>(0.80,1.<br>35) | 0.50<br>(0.20,1.2<br>5)     | 1.50<br>(1.23,1.<br>82)  | 1.08<br>(0.91,1.<br>29) | 1.18<br>(0.58,2.<br>40) | 0.95<br>(0.72,1.<br>25) | 0.78<br>(0.57,1.<br>08) | 0.89<br>(0.64,1.<br>24) | 1.26<br>(0.92,1.<br>74) | 1.40<br>(0.33,5.<br>98) | 0.91<br>(0.59,1.<br>43) |
| 0.77<br>(0.58,1.<br>01)  | 1.61<br>(0.81,3.<br>22) | 0.98<br>(0.72,1.<br>33) | 1.05<br>(0.83,1.<br>33) | Halope<br>ridol_L       | 0.97<br>(0.69,1.<br>36) | 1.10<br>(0.89,1.<br>36)  | 0.94<br>(0.67,1.<br>33)  | 0.49<br>(0.05,4.<br>99)  | 1.15<br>(0.85,1.<br>56) | 1.09<br>(0.83,1.<br>44) | 0.52<br>(0.21,1.2<br>9)     | 1.57<br>(1.24,1.<br>99)  | 1.13<br>(0.85,1.<br>51) | 1.24<br>(0.59,2.<br>62) | 1.00<br>(0.74,1.<br>34) | 0.82<br>(0.58,1.<br>15) | 0.93<br>(0.66,1.<br>31) | 1.32<br>(0.96,1.<br>83) | 1.46<br>(0.34,6.<br>23) | 0.96<br>(0.58,1.<br>43) |
| 0.79<br>(0.59,1.<br>07)  | 1.67<br>(0.80,3.<br>48) | 1.01<br>(0.65,1.<br>56) | 1.08<br>(0.79,1.<br>48) | 1.03<br>(0.73,1.<br>45) | Olanza<br>pine_L        | 1.13<br>(0.83,1.<br>47)  | 0.98<br>(0.65,1.<br>47)  | 0.50<br>(0.05,5.<br>26)  | 1.19<br>(0.83,1.<br>71) | 1.13<br>(0.83,1.<br>53) | 0.54<br>(0.21,1.4<br>0)     | 1.62<br>(1.27,2.<br>07)  | 1.17<br>(0.82,1.<br>68) | 1.28<br>(0.59,2.<br>78) | 1.03<br>(0.75,1.<br>41) | 0.85<br>(0.70,1.<br>02) | 0.96<br>(0.61,1.<br>38) | 1.37<br>(0.95,1.<br>96) | 1.51<br>(0.35,6.<br>55) | 0.99<br>(0.58,1.<br>70) |
| 0.70<br>(0.56,0.<br>.87) | 1.47<br>(0.73,2.<br>97) | 0.89<br>(0.62,1.<br>28) | 0.95<br>(0.74,1.<br>22) | 0.91<br>(0.74,1.<br>13) | 0.88<br>(0.65,1.<br>21) | Paliperi<br>done_L       | 0.86<br>(0.64,1.<br>15)  | 0.45<br>(0.04,4.<br>58)  | 1.05<br>(0.77,1.<br>43) | 0.99<br>(0.76,1.<br>30) | 0.48<br>(0.19,1.2<br>0)     | 1.43<br>(1.18,1.<br>.74) | 1.03<br>(0.76,1.<br>40) | 1.13<br>(0.53,2.<br>39) | 0.91<br>(0.70,1.<br>18) | 0.75<br>(0.54,1.<br>03) | 0.85<br>(0.61,1.<br>17) | 1.21<br>(0.87,1.<br>67) | 1.33<br>(0.32,5.<br>59) | 0.87<br>(0.53,1.<br>45) |
| 0.81<br>(0.57,1.<br>.15) | 1.71<br>(0.81,3.<br>63) | 1.03<br>(0.66,1.<br>62) | 1.11<br>(0.77,1.<br>59) | 1.06<br>(0.75,1.<br>50) | 1.03<br>(0.68,1.<br>54) | 1.16<br>(0.87,1.<br>55)  | 0.52<br>(0.05,5.<br>41)  | 1.22<br>(0.81,1.<br>83)  | 1.16<br>(0.80,1.<br>68) | 1.16<br>(0.80,1.<br>68) | 0.55<br>(0.21,1.4<br>4)     | 1.66<br>(1.20,2.<br>.31) | 1.20<br>(0.80,1.<br>79) | 1.31<br>(0.59,2.<br>91) | 1.05<br>(0.73,1.<br>53) | 0.87<br>(0.57,1.<br>32) | 0.98<br>(0.65,1.<br>50) | 1.40<br>(0.93,1.<br>12) | 1.55<br>(0.36,6.<br>69) | 1.02<br>(0.57,1.<br>80) |
| 1.57<br>(0.15,1.<br>62)  | 3.31<br>(2.09,3.<br>72) | 2.00<br>(0.20,2.<br>02) | 2.14<br>(0.21,2.<br>20) | 2.05<br>(0.20,2.<br>09) | 1.98<br>(0.19,2.<br>06) | 2.25<br>(0.22,23<br>.14) | 1.93<br>(0.18,20<br>.20) | Perphe<br>nazine_        | 2.35<br>(0.23,2.<br>43) | 2.23<br>(0.83,1.<br>31) | 1.07<br>(0.09,12<br>70)     | 3.21<br>(2.31,3.<br>30)  | 2.32<br>(0.22,2.<br>39) | 2.54<br>(0.22,2.<br>89) | 2.04<br>(0.20,2.<br>11) | 1.68<br>(0.16,1.<br>74) | 1.90<br>(0.18,1.<br>98) | 2.71<br>(0.26,2.<br>82) | 3.00<br>(6.25,6.<br>10) | 1.96<br>(0.18,2.<br>10) |
| 0.67<br>(0.49,0.<br>.91) | 1.40<br>(0.68,2.<br>89) | 0.85<br>(0.58,1.<br>25) | 0.91<br>(0.71,1.<br>16) | 0.87<br>(0.64,1.<br>18) | 0.84<br>(0.59,1.<br>21) | 0.95<br>(0.70,1.<br>30)  | 0.82<br>(0.55,1.<br>23)  | 0.42<br>(0.04,4.<br>39)  | Pipothi<br>azine_L      | 0.95<br>(0.69,1.<br>31) | 0.45<br>(0.18,1.1<br>6)     | 1.36<br>(1.05,1.<br>.78) | 0.98<br>(0.73,1.<br>33) | 1.08<br>(0.51,2.<br>28) | 0.87<br>(0.62,1.<br>21) | 0.71<br>(0.49,1.<br>03) | 0.81<br>(0.55,1.<br>18) | 1.15<br>(0.69,1.<br>04) | 1.27<br>(0.29,5.<br>51) | 0.83<br>(0.50,1.<br>38) |
| 0.70<br>(0.55,0.<br>.90) | 1.48<br>(0.73,3.<br>02) | 0.90<br>(0.61,1.<br>32) | 0.96<br>(0.74,1.<br>25) | 0.92<br>(0.69,1.<br>21) | 0.89<br>(0.65,1.<br>21) | 1.01<br>(0.77,1.<br>31)  | 0.87<br>(0.60,1.<br>26)  | 0.45<br>(0.04,4.<br>63)  | 1.05<br>(0.76,1.<br>45) | 0.48<br>(0.19,1.2<br>2) | 1.44<br>(1.18,1.<br>.75)    | 1.04<br>(0.76,1.<br>41)  | 1.14<br>(0.53,2.<br>42) | 0.91<br>(0.72,1.<br>16) | 0.75<br>(0.55,1.<br>02) | 0.85<br>(0.61,1.<br>04) | 1.21<br>(0.88,1.<br>48) | 1.34<br>(0.31,5.<br>76) | 0.88<br>(0.52,1.<br>47) |                         |
| 1.47<br>(0.58,3.<br>72)  | 3.09<br>(1.00,9.<br>54) | 1.87<br>(0.76,4.<br>59) | 2.00<br>(0.80,5.<br>01) | 1.91<br>(0.78,4.<br>70) | 1.85<br>(0.71,4.<br>80) | 2.10<br>(0.84,5.<br>26)  | 1.80<br>(0.69,4.<br>71)  | 0.93<br>(0.08,1.<br>108) | 2.20<br>(0.86,5.<br>30) | 2.09<br>(0.82,5.<br>30) | (Zulclop<br>enthinol<br>LAI | 3.00<br>(1.20,7.<br>53)  | 2.17<br>(0.85,5.<br>50) | 2.37<br>(0.74,7.<br>86) | 1.90<br>(0.60,4.<br>86) | 1.56<br>(0.60,4.<br>62) | 1.77<br>(0.98,6.<br>54) | 2.53<br>(0.68,4.<br>62) | 1.83<br>(0.51,1.<br>53) | 1.83<br>(0.66,5.<br>08) |
| 0.49<br>(0.41,0.<br>.58) | 1.03<br>(0.51,2.<br>06) | 0.62<br>(0.44,0.<br>89) | 0.67<br>(0.55,0.<br>81) | 0.64<br>(0.50,0.<br>81) | 0.62<br>(0.48,0.<br>79) | 0.70<br>(0.48,0.<br>85)  | 0.60<br>(0.43,0.<br>84)  | 0.31<br>(0.03,3.<br>20)  | 0.73<br>(0.56,0.<br>96) | 0.70<br>(0.57,0.<br>85) | 0.33<br>(0.13,0.8<br>4)     | Placeb<br>o              | 0.72<br>(0.56,0.<br>94) | 0.79<br>(0.38,1.<br>65) | 0.63<br>(0.52,0.<br>78) | 0.52<br>(0.40,0.<br>68) | 0.59<br>(0.45,0.<br>78) | 0.84<br>(0.64,1.<br>11) | 0.93<br>(0.22,3.<br>96) | 0.61<br>(0.38,0.<br>99) |

|                         |                         |                         |                         |                          |                         |                         |                         |                         |                         |                         |                         |                          |                          |                         |                         |                         |                         |                         |                         |                         |                         |
|-------------------------|-------------------------|-------------------------|-------------------------|--------------------------|-------------------------|-------------------------|-------------------------|-------------------------|-------------------------|-------------------------|-------------------------|--------------------------|--------------------------|-------------------------|-------------------------|-------------------------|-------------------------|-------------------------|-------------------------|-------------------------|-------------------------|
| 0.68<br>(0.50,0<br>.92) | 1.43<br>(0.70,2.<br>90) | 0.86<br>(0.59,1.<br>26) | 0.93<br>(0.78,1.<br>10) | 0.88<br>(0.66,1.<br>.17) | 0.85<br>(0.60,1.<br>23) | 0.97<br>(0.71,1.<br>32) | 0.83<br>(0.56,1.<br>25) | 0.43<br>(0.04,4.<br>46) | 1.02<br>(0.75,1.<br>37) | 0.96<br>(0.71,1.<br>31) | 0.46<br>(0.18,1,1<br>7) | 1.39<br>(1.07,1.<br>.80) | Phenoti<br>azines_<br>OS | 1.10<br>(0.53,2.<br>27) | 0.88<br>(0.63,1.<br>22) | 0.72<br>(0.50,1.<br>04) | 0.82<br>(0.56,1.<br>19) | 1.17<br>(0.82,1.<br>68) | 1.29<br>(0.30,5.<br>59) | 0.85<br>(0.52,1.<br>36) |                         |
| 0.62<br>(0.29,1<br>.31) | 1.30<br>(0.48,3.<br>49) | 0.79<br>(0.36,1.<br>73) | 0.84<br>(0.42,1.<br>71) | 0.81<br>(0.38,1.<br>.70) | 0.78<br>(0.36,1.<br>69) | 0.88<br>(0.42,1.<br>87) | 0.76<br>(0.34,1.<br>69) | 0.39<br>(0.03,4.<br>49) | 0.93<br>(0.44,1.<br>96) | 0.88<br>(0.41,1.<br>87) | 0.42<br>(0.13,1,3<br>4) | 1.26<br>(0.61,2.<br>.64) | 1.31<br>(0.44,1.<br>89)  | Halope<br>ridol_O<br>S  | 0.91<br>(0.44,1.<br>72) | 0.80<br>(0.30,1.<br>44) | 0.66<br>(0.34,1.<br>64) | 0.75<br>(0.49,2.<br>32) | 1.07<br>(0.23,5.<br>95) | 1.18<br>(0.33,1.<br>78) | 0.77<br>(0.57,1.<br>62) |
| 0.77<br>(0.63,0<br>.94) | 1.62<br>(0.79,3.<br>33) | 0.98<br>(0.66,1.<br>47) | 1.05<br>(0.80,1.<br>39) | 1.00<br>(0.75,1.<br>.35) | 0.97<br>(0.71,1.<br>33) | 1.10<br>(0.85,1.<br>43) | 0.95<br>(0.65,1.<br>38) | 0.49<br>(0.05,5.<br>09) | 1.16<br>(0.83,1.<br>61) | 1.10<br>(0.86,1.<br>39) | 0.53<br>(0.21,1,3<br>4) | 1.58<br>(1.29,1.<br>.93) | 1.14<br>(0.82,1.<br>58)  | 1.25<br>(0.58,2.<br>66) | Aripipr<br>azole_<br>OS | 0.82<br>(0.59,1.<br>14) | 0.93<br>(0.68,1.<br>27) | 1.33<br>(0.98,1.<br>81) | 1.47<br>(0.34,6.<br>31) | 0.96<br>(0.57,1.<br>62) |                         |
| 0.94<br>(0.68,1<br>.29) | 1.97<br>(0.94,4.<br>13) | 1.19<br>(0.77,1.<br>85) | 1.28<br>(0.93,1.<br>77) | 1.22<br>(0.87,1.<br>.72) | 1.18<br>(0.99,1.<br>42) | 1.34<br>(0.97,1.<br>86) | 1.15<br>(0.76,1.<br>75) | 0.60<br>(0.06,6.<br>23) | 1.41<br>(0.97,2.<br>04) | 1.33<br>(0.98,1.<br>82) | 0.64<br>(0.25,1,6<br>6) | 1.92<br>(1.47,2<br>.49)  | 1.38<br>(0.96,1.<br>99)  | 1.52<br>(0.70,3.<br>30) | 1.22<br>(0.88,1.<br>69) | Olanza<br>pine_O<br>S   | 1.13<br>(0.78,1.<br>64) | 1.62<br>(1.13,2.<br>33) | 1.79<br>(0.41,7.<br>78) | 1.17<br>(0.68,2.<br>03) |                         |
| 0.83<br>(0.60,1<br>.13) | 1.74<br>(0.83,3.<br>65) | 1.05<br>(0.68,1.<br>64) | 1.13<br>(0.81,1.<br>57) | 1.08<br>(0.76,1.<br>.52) | 1.04<br>(0.73,1.<br>50) | 1.18<br>(0.85,1.<br>64) | 1.02<br>(0.67,1.<br>55) | 0.53<br>(0.05,5.<br>49) | 1.24<br>(0.85,1.<br>81) | 1.18<br>(0.96,1.<br>44) | 0.56<br>(0.22,1,4<br>7) | 1.69<br>(1.28,2<br>.23)  | 1.22<br>(0.84,1.<br>77)  | 1.34<br>(0.61,2.<br>92) | 1.07<br>(0.79,1.<br>46) | 0.88<br>(0.61,1.<br>27) | Risperi<br>done_<br>OS  | 1.43<br>(1.07,1.<br>90) | 1.58<br>(0.36,6.<br>86) | 1.03<br>(0.59,1.<br>80) |                         |
| 0.58<br>(0.42,0<br>.79) | 1.22<br>(0.58,2.<br>54) | 0.74<br>(0.48,1.<br>13) | 0.79<br>(0.57,1.<br>09) | 0.75<br>(0.55,1.<br>.04) | 0.73<br>(0.51,1.<br>05) | 0.83<br>(0.60,1.<br>14) | 0.71<br>(0.47,1.<br>08) | 0.37<br>(0.04,3.<br>26) | 0.87<br>(0.60,1.<br>26) | 0.82<br>(0.67,1.<br>01) | 0.39<br>(0.15,1,0<br>2) | 1.18<br>(0.90,1<br>.56)  | 1.85<br>(0.60,1.<br>22)  | 0.94<br>(0.43,2.<br>04) | 0.75<br>(0.55,1.<br>02) | 0.62<br>(0.43,0.<br>89) | 0.70<br>(0.53,0.<br>93) | Quetia<br>pine_O<br>S   | 1.10<br>(0.25,4.<br>80) | 0.72<br>(0.42,1.<br>25) |                         |
| 0.52<br>(0.12,2<br>.23) | 1.10<br>(0.22,5.<br>44) | 0.67<br>(0.15,2.<br>92) | 0.72<br>(0.17,3.<br>06) | 0.68<br>(0.16,2.<br>91)  | 0.66<br>(0.15,2.<br>87) | 0.75<br>(0.18,3.<br>14) | 0.65<br>(0.15,2.<br>78) | 0.33<br>(0.02,5.<br>15) | 0.79<br>(0.18,3.<br>40) | 0.75<br>(0.17,3.<br>20) | 0.36<br>(0.07,1,9<br>6) | 1.07<br>(0.25,4<br>55)   | 0.77<br>(0.18,3.<br>35)  | 0.85<br>(0.17,4.<br>27) | 0.68<br>(0.16,2.<br>92) | 0.56<br>(0.13,2.<br>43) | 0.63<br>(0.15,2.<br>76) | 0.91<br>(0.21,3.<br>93) | Paliperi<br>done_<br>OS | 0.65<br>(0.14,2.<br>99) |                         |
| 0.80<br>(0.48,1<br>.33) | 1.68<br>(0.74,3.<br>82) | 1.02<br>(0.58,1.<br>79) | 1.09<br>(0.70,1.<br>70) | 1.04<br>(0.63,1.<br>.73) | 1.01<br>(0.59,1.<br>74) | 1.15<br>(0.69,1.<br>90) | 0.98<br>(0.56,1.<br>75) | 0.51<br>(0.05,5.<br>46) | 1.20<br>(0.72,1.<br>99) | 1.14<br>(0.68,1.<br>91) | 0.55<br>(0.20,1,5<br>1) | 1.64<br>(1.01,2<br>.66)  | 1.18<br>(0.73,1.<br>91)  | 1.29<br>(0.56,2.<br>99) | 1.04<br>(0.62,1.<br>75) | 0.85<br>(0.49,1.<br>48) | 0.97<br>(0.56,1.<br>69) | 1.38<br>(0.80,2.<br>39) | 1.53<br>(0.33,6.<br>98) | DBP_<br>OS              |                         |

Net league table: head-to-head comparisons. Relative risks (RRs) and 95% confidence intervals (CIs) are reported. RRs lower than 1 favour the column-defining treatment. Statistically significant results are highlighted in grey. LAI=long-acting antipsychotics

### Evaluation of heterogeneity and incoherence

#### Overall heterogeneity

Estimated between-studies SD: .08120208

#### Overall incoherence

Design-by-treatment test: P = 0.220

#### Loop-specific approach

- \* 22 triangular loops found
- \* 3 quadratic loops found

Note: Heterogeneity of loop A-D-F cannot be estimated due to insufficient observations - set equal to 0  
Note: Heterogeneity of loop A-D-G cannot be estimated due to insufficient observations - set equal to 0  
Note: Heterogeneity of loop A-I-Q cannot be estimated due to insufficient observations - set equal to 0  
Note: Heterogeneity of loop A-J-L cannot be estimated due to insufficient observations - set equal to 0  
Note: Heterogeneity of loop A-J-P cannot be estimated due to insufficient observations - set equal to 0  
Note: Heterogeneity of loop A-J-Q cannot be estimated due to insufficient observations - set equal to 0  
Note: Heterogeneity of loop A-K-P cannot be estimated due to insufficient observations - set equal to 0  
Note: Heterogeneity of loop A-L-M cannot be estimated due to insufficient observations - set equal to 0  
Note: Heterogeneity of loop C-D-E cannot be estimated due to insufficient observations - set equal to 0  
Note: Heterogeneity of loop C-D-F cannot be estimated due to insufficient observations - set equal to 0  
Note: Heterogeneity of loop A-D-J-S cannot be estimated due to insufficient observations - set equal to 0  
Note: Heterogeneity of loop D-J-L-S cannot be estimated due to insufficient observations - set equal to 0

Evaluation of inconsistency using loop-specific heterogeneity estimates:

| Loop    | ROR    | z_value | p_value | CI_95         | Loop_Heterog_tau2 |
|---------|--------|---------|---------|---------------|-------------------|
| B-C-E   | 13.068 | 1.236   | 0.217   | (1.00,770.41) | 0.208             |
| B-D-E   | 6.829  | 1.073   | 0.283   | (1.00,228.34) | 0.061             |
| A-B-G   | 4.015  | 1.496   | 0.135   | (1.00,24.79)  | 0.008             |
| A-D-L   | 3.144  | 1.963   | 0.050   | (1.00,9.87)   | 0.037             |
| A-B-N   | 2.617  | 1.875   | 0.061   | (1.00,7.15)   | 0.044             |
| A-D-F   | 2.548  | 0.899   | 0.369   | (1.00,19.58)  | 0.000             |
| A-D-J-S | 2.364  | 1.575   | 0.115   | (1.00,6.90)   | 0.000             |
| A-B-D   | 2.302  | 1.589   | 0.112   | (1.00,6.44)   | 0.044             |
| A-J-Q   | 1.977  | 1.683   | 0.092   | (1.00,4.37)   | 0.000             |
| B-C-F   | 1.933  | 1.196   | 0.232   | (1.00,5.69)   | 0.000             |
| A-L-M   | 1.756  | 1.432   | 0.152   | (1.00,3.79)   | 0.000             |
| B-C-D   | 1.640  | 0.852   | 0.394   | (1.00,5.12)   | 0.080             |
| A-D-G   | 1.510  | 0.421   | 0.673   | (1.00,10.26)  | 0.000             |
| A-K-L   | 1.450  | 1.609   | 0.108   | (1.00,2.28)   | 0.000             |
| A-I-Q   | 1.438  | 1.842   | 0.065   | (1.00,2.12)   | 0.000             |
| A-J-L   | 1.356  | 0.518   | 0.605   | (1.00,4.29)   | 0.000             |
| B-D-G   | 1.184  | 0.200   | 0.841   | (1.00,6.17)   | 0.034             |
| C-D-F   | 1.174  | 0.154   | 0.877   | (1.00,8.99)   | 0.000             |

|  |         |       |       |       |             |  |       |  |
|--|---------|-------|-------|-------|-------------|--|-------|--|
|  | A-J-P   | 1.146 | 0.614 | 0.539 | (1.00,1.77) |  | 0.000 |  |
|  | C-D-E   | 1.120 | 0.119 | 0.905 | (1.00,7.25) |  | 0.000 |  |
|  | B-D-F   | 1.101 | 0.099 | 0.921 | (1.00,7.46) |  | 0.000 |  |
|  | J-K-L-P | 1.098 | 0.152 | 0.879 | (1.00,3.65) |  | 0.000 |  |
|  | D-J-L-S | 1.066 | 0.095 | 0.925 | (1.00,4.02) |  | 0.000 |  |
|  | A-B-F   | 1.034 | 0.120 | 0.905 | (1.00,1.77) |  | 0.000 |  |
|  | A-K-P   | 1.014 | 0.065 | 0.948 | (1.00,1.53) |  | 0.000 |  |

Consistency between direct and indirect estimates

| Side  | Direct<br>Coef.  | Std. Err.       | Indirect<br>Coef. | Std. Err.       | Difference<br>Coef. | Std. Err.       | P> z         |
|-------|------------------|-----------------|-------------------|-----------------|---------------------|-----------------|--------------|
| A B   | -.3584688        | .1180232        | -.5517565         | .2113194        | .1932878            | .2432149        | 0.427        |
| A D   | <b>-1.201602</b> | <b>.3996779</b> | <b>-.3817692</b>  | <b>.1164581</b> | <b>-.8198329</b>    | <b>.4158375</b> | <b>0.049</b> |
| A F   | -.2040437        | .1778463        | -.4568781         | .2060239        | .2528344            | .2701946        | 0.349        |
| A G   | -.9162907        | .7112449        | .3369561          | .4058253        | -1.253247           | .8188794        | 0.126        |
| A I   | -.4332336        | .1075931        | -.8123554         | .2496536        | .3791218            | .2625495        | 0.149        |
| A J   | -.3015421        | .1247382        | -.4891355         | .1719051        | .1875934            | .2123935        | 0.377        |
| A K   | -.7522521        | .1122152        | -.6333478         | .1681113        | -.1189042           | .2026729        | 0.557        |
| A L   | <b>-.0845222</b> | <b>.1543094</b> | <b>-.5305405</b>  | <b>.1225964</b> | <b>.4460183</b>     | <b>.1974115</b> | <b>0.024</b> |
| A M   | -.7490276        | .3475466        | -.4349496         | .1927618        | -.314078            | .3974239        | 0.429        |
| A N   | <b>-.9332753</b> | <b>.2851742</b> | <b>-.1663494</b>  | <b>.1329146</b> | <b>-.7669259</b>    | <b>.3194369</b> | <b>0.016</b> |
| A P   | -.479227         | .1525934        | -.4318568         | .1557715        | -.0473702           | .2178206        | 0.828        |
| A Q   | <b>-.8637654</b> | <b>.1420238</b> | <b>-.160389</b>   | <b>.2095304</b> | <b>-.7033764</b>    | <b>.2657996</b> | <b>0.008</b> |
| B C   | -.4909101        | .3769057        | .046712           | .1982496        | -.537622            | .4258823        | 0.207        |
| B D   | -.0781731        | .1881836        | -.0264037         | .158221         | -.0517694           | .2472297        | 0.834        |
| B E   | 1.147426         | 1.604912        | -.8658357         | .4892526        | 2.013262            | 1.677831        | 0.230        |
| B F   | .0674962         | .1389402        | .205487           | .2922166        | -.1379908           | .3248802        | 0.671        |
| B G   | .8069811         | .5665884        | .1983863          | .4479201        | .6085948            | .7222547        | 0.399        |
| B N * | .0928686         | .0820479        | -.5620682         | .4396522        | .6549368            | .4401293        | 0.137        |
| B O * | .1690245         | .3613343        | .7975224          | 178.2127        | -.6284978           | 178.2132        | 0.997        |
| B U * | -.0890366        | .2264024        | .820888           | 45.17074        | -.9099246           | 45.17121        | 0.984        |
| C D   | 2.70e-11         | .1901175        | .0762988          | .2885917        | -.0762988           | .3455862        | 0.825        |
| C E   | -.8473093        | .6452064        | -.3969261         | .6529991        | -.4503832           | .9179825        | 0.624        |
| C F   | -.1115892        | .3944483        | .2555733          | .2297764        | -.3671625           | .4564938        | 0.421        |
| C H * | -.6931472        | 1.17541         | .8298544          | 196.6017        | -1.523002           | 196.6027        | 0.994        |
| D E   | -.7339765        | .6897831        | -.5794421         | .61532          | -.1545343           | .924346         | 0.867        |
| D F   | .0487902         | .9534607        | .1425328          | .1589808        | -.0937426           | .9666241        | 0.923        |
| D G   | .693162          | .5536478        | .3337699          | .456934         | .3593921            | .7178629        | 0.617        |
| D L   | .0099773         | .1145972        | .3277267          | .1946047        | -.3177495           | .2258395        | 0.159        |
| D S   | .2336281         | .3720287        | .2951295          | .1913174        | -.0615014           | .4183396        | 0.883        |
| I Q * | -.185876         | .0972389        | .7982918          | .8255047        | -.9841678           | .8358916        | 0.239        |
| J L   | -.0896153        | .5683949        | .0129493          | .1412334        | -.1025646           | .5856788        | 0.861        |
| J P   | -.0413672        | .1892926        | -.1243612         | .1691019        | .082994             | .253825         | 0.744        |
| J Q   | .1177857         | .378403         | -.3742808         | .1774682        | .4920665            | .4179519        | 0.239        |
| J R * | -.161441         | .1040817        | .7687703          | 30.42659        | -.9302113           | 30.42664        | 0.976        |
| J S   | .198114          | .1108947        | .1366823          | .4033421        | .0614317            | .4183092        | 0.883        |
| K L   | .2920154         | .1759227        | .41137            | .1561594        | -.1193546           | .2352602        | 0.612        |
| K P   | .2470355         | .1187384        | .309143           | .2402562        | -.0621075           | .2695652        | 0.818        |
| L M   | -.099321         | .1620218        | -.413391          | .3628969        | .31407              | .3974232        | 0.429        |
| L T * | .2876821         | .731004         | .6942335          | 192.6889        | -.4065514           | 192.6907        | 0.998        |

\* Warning: all the evidence about these contrasts comes from the trials which directly compare them. See help file for more information.

SUCRA and cumulative probability plots

| Treatment          | SUCRA | PrBest | MeanRank |
|--------------------|-------|--------|----------|
| Placebo            | 8.0   | 0.0    | 19.4     |
| Fluphenazine_LAI   | 48.3  | 0.0    | 11.3     |
| Flupenthixol_LAI   | 57.9  | 0.2    | 9.4      |
| Haloperidol_LAI    | 55.5  | 0.0    | 9.9      |
| Zuclopenthixol_LAI | 89.6  | 37.7   | 3.1      |
| Pipothiazine_LAI   | 34.0  | 0.0    | 14.2     |
| Bromperidol_LAI    | 15.4  | 0.1    | 17.9     |
| Perphenazine_LAI   | 72.9  | 48.3   | 6.4      |
| Olanzapine_LAI     | 58.3  | 0.0    | 9.3      |
| Risperidone_LAI    | 40.7  | 0.0    | 12.9     |
| Aripiprazole_LAI   | 86.1  | 3.3    | 3.8      |
| Paliperidone_LAI_1 | 39.5  | 0.0    | 13.1     |
| Paliperidone_LAI_3 | 62.5  | 0.5    | 8.5      |
| Phenothiazines_OS  | 35.7  | 0.0    | 13.9     |
| Haloperidol_OS     | 34.8  | 0.9    | 14.0     |
| Aripiprazole_OS    | 55.4  | 0.0    | 9.9      |
| Olanzapine_OS      | 79.6  | 1.9    | 5.1      |

|                 |      |     |      |
|-----------------|------|-----|------|
| Risperidone_OS  | 65.4 | 0.3 | 7.9  |
| Quetiapine_OS   | 19.2 | 0.0 | 17.2 |
| Paliperidone_OS | 32.9 | 5.2 | 14.4 |
| DBP_OS          | 58.3 | 1.6 | 9.3  |

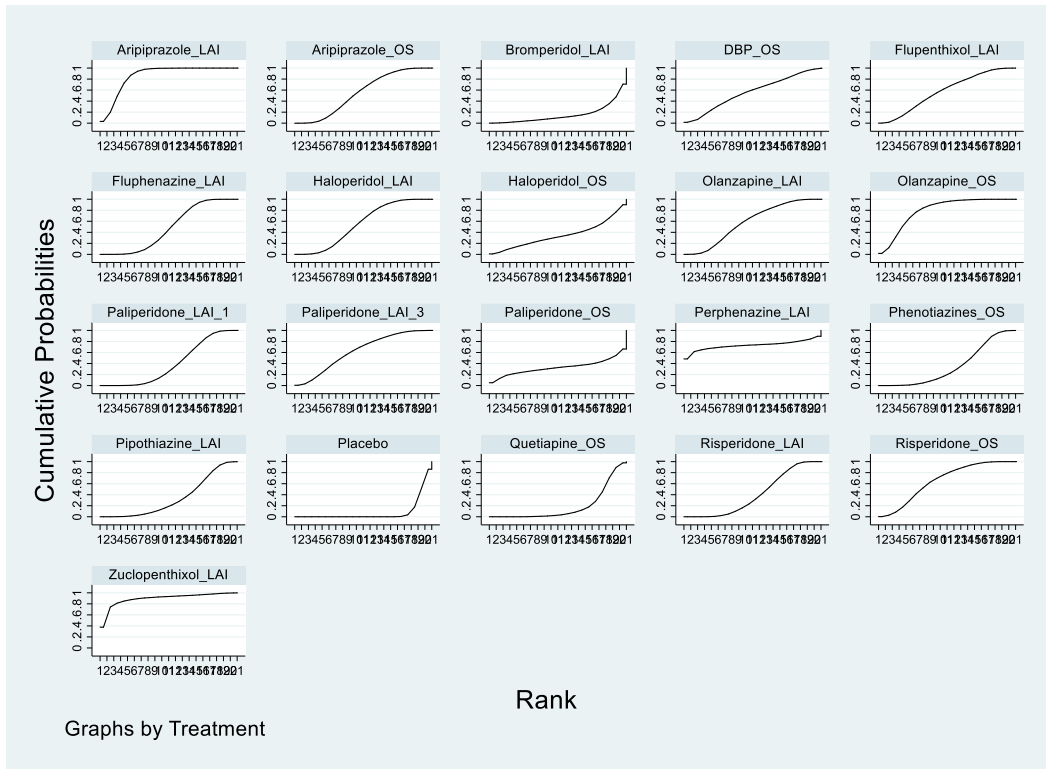

#### Funnel plot

Not applicable: no comparisons with 10 or more studies.

#### GRADE appraisal (CINeMA)

The analysis of the certainty of the evidence was performed with the online application CINeMA, which follows the principles of the GRADE methodology. The following criteria were applied:

- Within-study bias: the "overall" risk of bias of each study was calculated as follows: (a) LOW risk if four or more domains of the Cochrane RoB were at low risk (even if three were at high risk); (b) HIGH risk if three or more domains were at high risk; (c) UNCLEAR RISK in all other cases. For each comparison, the histogram was interpreted according to a "Majority risk of bias" rule;
- Across-studies bias was considered "undetected" when was not possible to evaluate the risk of publication bias;
- Indirectness: the histogram was interpreted according to a "Majority risk of bias" rule;
- Imprecision: risk ratio between 0.667 to 1.5 was considered as a clinically important size of effect;
- Heterogeneity: risk ratio between 0.667 to 1.5 was considered as a clinically important size of effect;
- Incoherence: for all the comparisons for which only a direct or indirect estimation was available (Inconsistency measures: Not applicable) we reported "some concern".

#### Within-study bias

The bar chart shows the contributions of each piece of study to the network estimate. Green=low risk; Yellow=unclear risk; Red=high risk

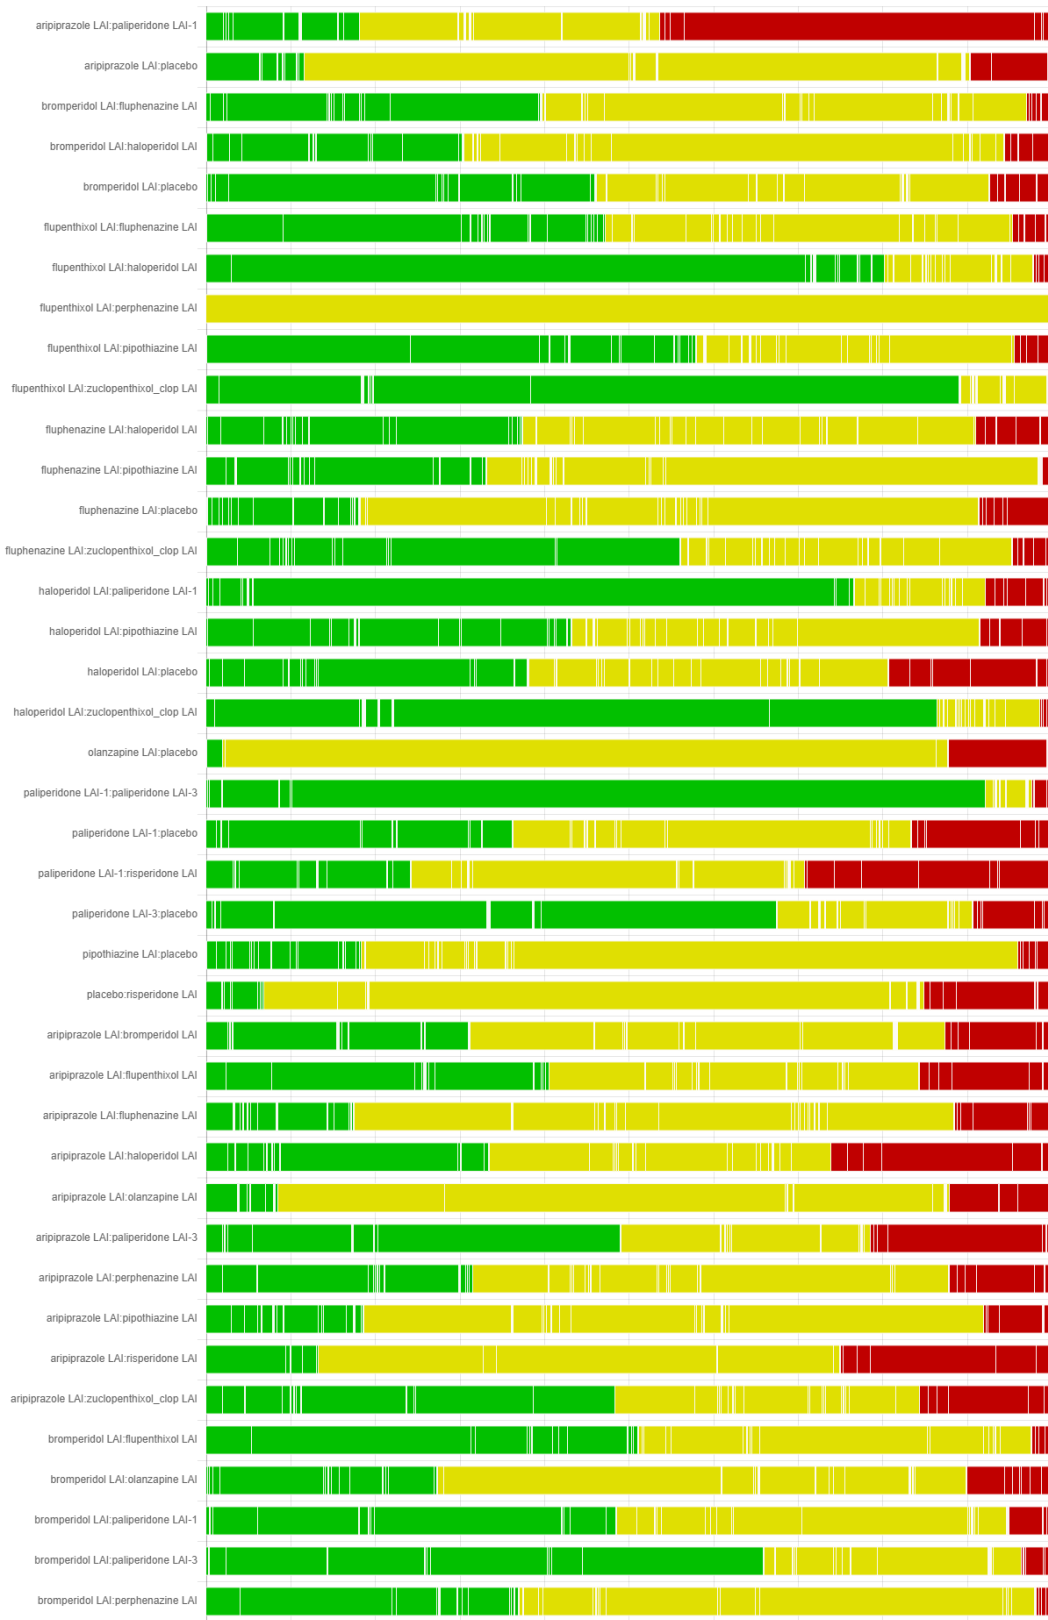



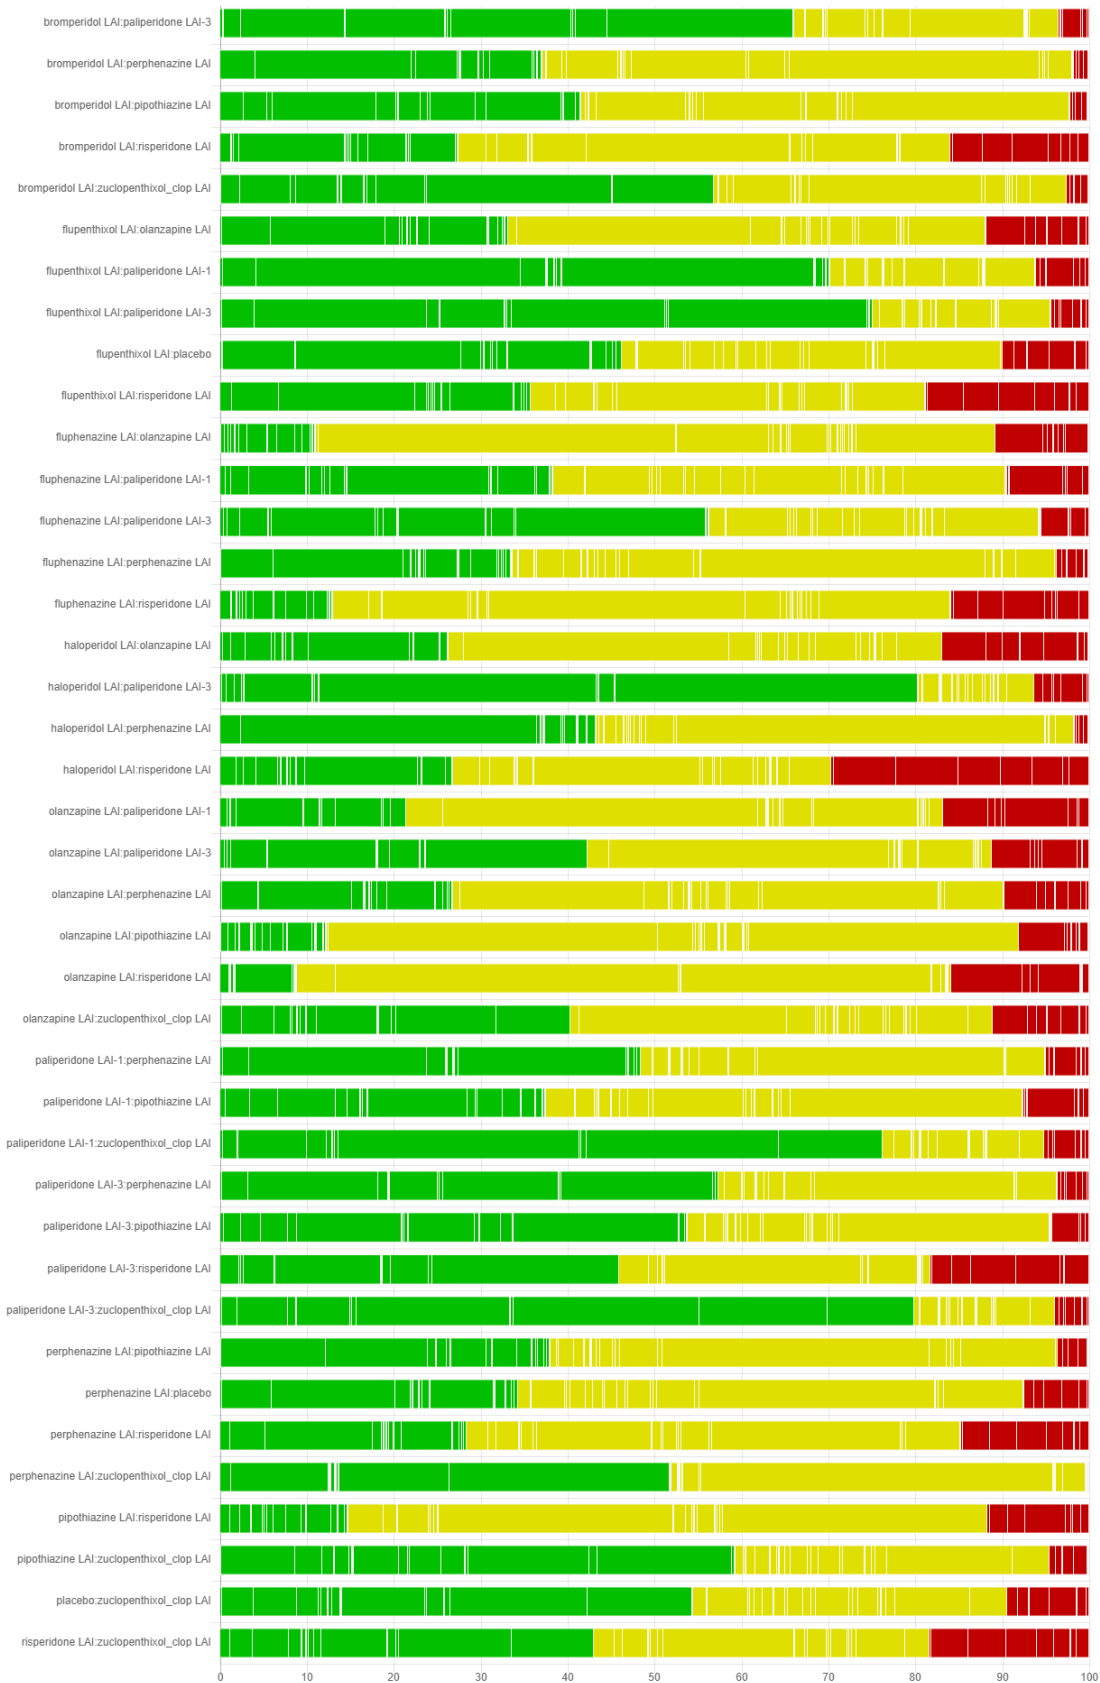

Indirectness

The bar chart shows the contributions of each study to the network estimate. Green=low risk; Yellow=unclear risk; Red=high risk

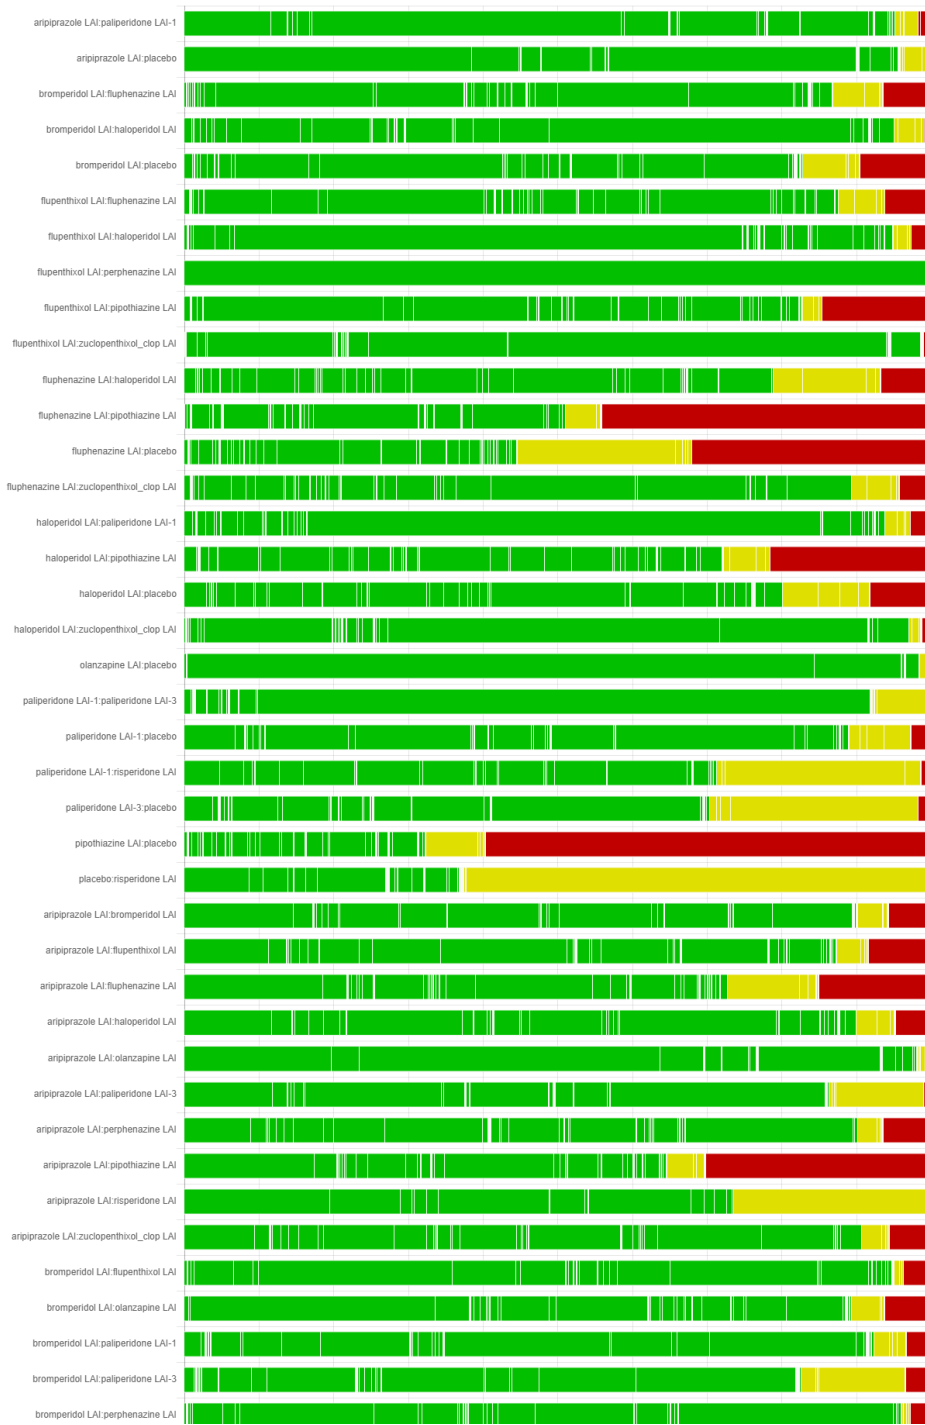

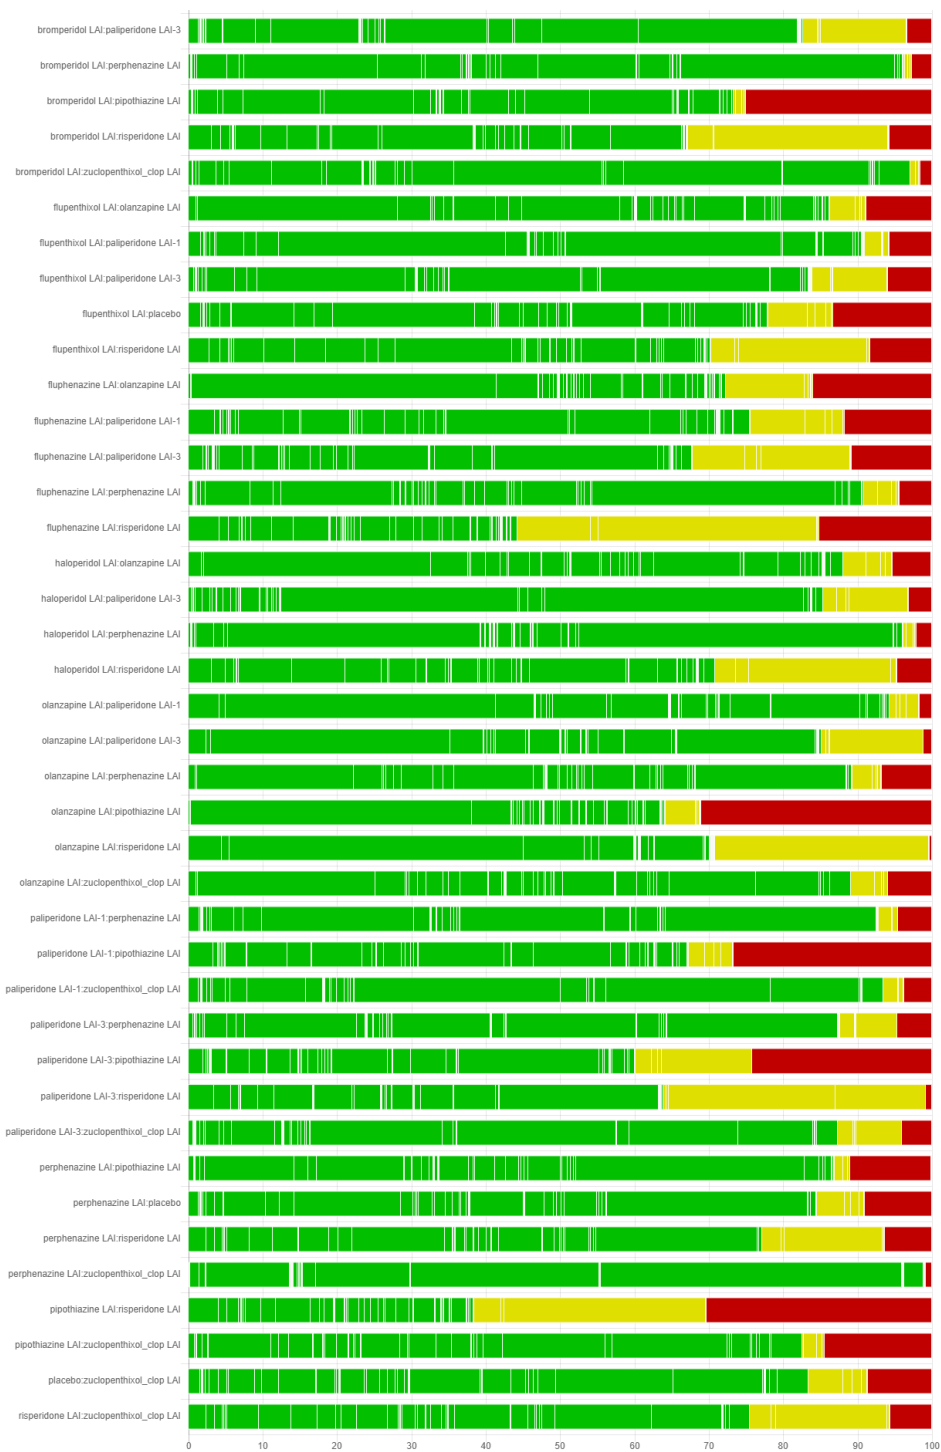

Final report

| Comparison                          | Number of studies | Within-study bias | Reporting bias | Indirectness | Imprecision    | Heterogeneity | Incoherence   | Confidence rating |
|-------------------------------------|-------------------|-------------------|----------------|--------------|----------------|---------------|---------------|-------------------|
| aripiprazole LAI:paliperidone LAI-1 | 2                 | Major concerns    | Undetected     | No concerns  | No concerns    | No concerns   | No concerns   | Low               |
| aripiprazole LAI:placebo            | 2                 | Some concerns     | Undetected     | No concerns  | No concerns    | No concerns   | No concerns   | Moderate          |
| bromperidol LAI:fluphenazine LAI    | 2                 | Some concerns     | Undetected     | No concerns  | Some concerns  | No concerns   | No concerns   | Low               |
| bromperidol LAI:haloperidol LAI     | 1                 | Some concerns     | Undetected     | No concerns  | Some concerns  | No concerns   | No concerns   | Low               |
| bromperidol LAI:placebo             | 1                 | Some concerns     | Undetected     | No concerns  | Major concerns | No concerns   | No concerns   | Very low          |
| flupenthixol LAI:fluphenazine LAI   | 3                 | Some concerns     | Undetected     | No concerns  | Some concerns  | No concerns   | No concerns   | Low               |
| flupenthixol LAI:haloperidol LAI    | 1                 | No concerns       | Undetected     | No concerns  | No concerns    | Some concerns | No concerns   | Moderate          |
| flupenthixol LAI:perphenazine LAI   | 1                 | Some concerns     | Undetected     | No concerns  | Major concerns | No concerns   | Some concerns | Very low          |



|                                            |   |               |            |             |                |               |               |          |
|--------------------------------------------|---|---------------|------------|-------------|----------------|---------------|---------------|----------|
| haloperidol LAI:paliperidone LAI-3         | 0 | No concerns   | Undetected | No concerns | Some concerns  | No concerns   | Some concerns | Low      |
| haloperidol LAI:perphenazine LAI           | 0 | Some concerns | Undetected | No concerns | Major concerns | No concerns   | Some concerns | Very low |
| haloperidol LAI:risperidone LAI            | 0 | Some concerns | Undetected | No concerns | No concerns    | Some concerns | Some concerns | Very low |
| olanzapine LAI:paliperidone LAI-1          | 0 | Some concerns | Undetected | No concerns | Some concerns  | No concerns   | Some concerns | Very low |
| olanzapine LAI:paliperidone LAI-3          | 0 | Some concerns | Undetected | No concerns | Major concerns | No concerns   | Some concerns | Very low |
| olanzapine LAI:perphenazine LAI            | 0 | Some concerns | Undetected | No concerns | Major concerns | No concerns   | Some concerns | Very low |
| olanzapine LAI:pipothiazine LAI            | 0 | Some concerns | Undetected | No concerns | Some concerns  | No concerns   | Some concerns | Very low |
| olanzapine LAI:risperidone LAI             | 0 | Some concerns | Undetected | No concerns | Some concerns  | No concerns   | Some concerns | Very low |
| olanzapine LAI:zuclopenthixol_clop LAI     | 0 | Some concerns | Undetected | No concerns | Some concerns  | No concerns   | Some concerns | Very low |
| paliperidone LAI-1:perphenazine LAI        | 0 | No concerns   | Undetected | No concerns | Major concerns | No concerns   | Some concerns | Very low |
| paliperidone LAI-1:pipothiazine LAI        | 0 | Some concerns | Undetected | No concerns | No concerns    | Some concerns | Some concerns | Very low |
| paliperidone LAI-1:zuclopenthixol_clop LAI | 0 | No concerns   | Undetected | No concerns | Some concerns  | No concerns   | Some concerns | Low      |
| paliperidone LAI-3:perphenazine LAI        | 0 | No concerns   | Undetected | No concerns | Major concerns | No concerns   | Some concerns | Very low |
| paliperidone LAI-3:pipothiazine LAI        | 0 | No concerns   | Undetected | No concerns | Some concerns  | No concerns   | Some concerns | Low      |
| paliperidone LAI-3:risperidone LAI         | 0 | No concerns   | Undetected | No concerns | Some concerns  | No concerns   | Some concerns | Low      |
| paliperidone LAI-3:zuclopenthixol_clop LAI | 0 | No concerns   | Undetected | No concerns | Some concerns  | Some concerns | Some concerns | Very low |
| perphenazine LAI:pipothiazine LAI          | 0 | Some concerns | Undetected | No concerns | Major concerns | No concerns   | Some concerns | Very low |
| perphenazine LAI:placebo                   | 0 | Some concerns | Undetected | No concerns | Major concerns | No concerns   | Some concerns | Very low |
| perphenazine LAI:risperidone LAI           | 0 | Some concerns | Undetected | No concerns | Major concerns | No concerns   | Some concerns | Very low |
| perphenazine LAI:zuclopenthixol_clop LAI   | 0 | No concerns   | Undetected | No concerns | Major concerns | No concerns   | Some concerns | Very low |
| pipothiazine LAI:risperidone LAI           | 0 | Some concerns | Undetected | No concerns | No concerns    | Some concerns | Some concerns | Very low |
| pipothiazine LAI:zuclopenthixol_clop LAI   | 0 | No concerns   | Undetected | No concerns | Some concerns  | No concerns   | Some concerns | Low      |
| placebo:zuclopenthixol_clop LAI            | 0 | No concerns   | Undetected | No concerns | No concerns    | No concerns   | Some concerns | Moderate |
| risperidone LAI:zuclopenthixol_clop LAI    | 0 | No concerns   | Undetected | No concerns | Some concerns  | No concerns   | Some concerns | Low      |

## Supplement M - Sensitivity analysis: acceptability (excluding trials in which clinicians and participants were not blind to treatment allocation)

### Treatment codes

|                      |   |
|----------------------|---|
| Placebo              | A |
| Fluphenazine LAI     | B |
| Flupenthixol LAI     | C |
| Haloperidol LAI      | D |
| (Zu)clopenthixol LAI | E |
| Pipothiazine LAI     | F |
| Bromperidol LAI      | G |
| Olanzapine LAI       | H |
| Risperidone LAI      | I |
| Aripiprazole LAI     | J |
| Paliperidone LAI-1   | K |
| Paliperidone LAI-3   | L |
| Phenothiazines OS    | M |
| Haloperidol OS       | N |
| Aripiprazole OS      | O |
| Olanzapine OS        | P |
| Risperidone OS       | Q |
| DBP_OS               | R |

### Network map

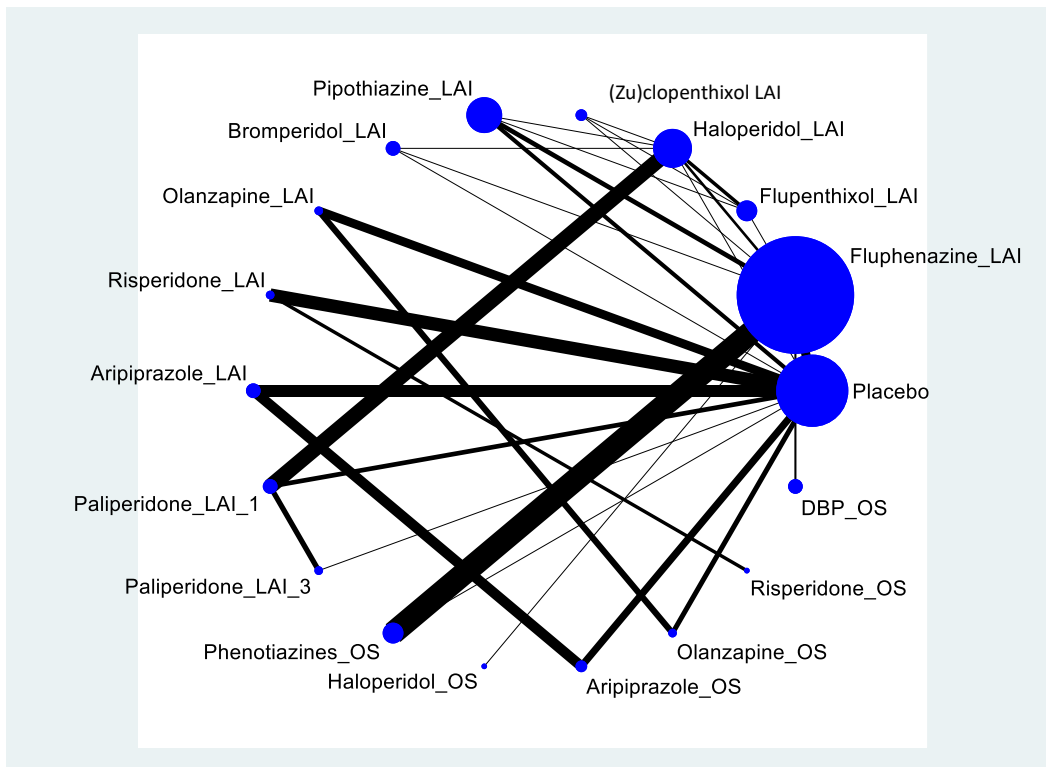

### Pairwise meta-analysis

| Study         | ES    | [95% Conf. Interval] |       |
|---------------|-------|----------------------|-------|
| Q - I         |       |                      |       |
| 1             | 0.789 | 0.563                | 1.105 |
| Sub-total     |       |                      |       |
| D+L pooled ES | 0.789 | 0.563                | 1.105 |

|               |  |       |       |        |
|---------------|--|-------|-------|--------|
| -----         |  |       |       |        |
| J - A         |  |       |       |        |
| 6             |  | 0.487 | 0.376 | 0.631  |
| 39            |  | 0.457 | 0.353 | 0.592  |
| Sub-total     |  |       |       |        |
| D+L pooled ES |  | 0.472 | 0.393 | 0.567  |
| -----         |  |       |       |        |
| O - A         |  |       |       |        |
| 6             |  | 0.619 | 0.490 | 0.782  |
| Sub-total     |  |       |       |        |
| D+L pooled ES |  | 0.619 | 0.490 | 0.782  |
| -----         |  |       |       |        |
| O - J         |  |       |       |        |
| 6             |  | 1.271 | 0.974 | 1.657  |
| 7             |  | 1.294 | 0.972 | 1.722  |
| Sub-total     |  |       |       |        |
| D+L pooled ES |  | 1.281 | 1.055 | 1.556  |
| -----         |  |       |       |        |
| H - A         |  |       |       |        |
| 8             |  | 0.636 | 0.515 | 0.786  |
| Sub-total     |  |       |       |        |
| D+L pooled ES |  | 0.636 | 0.515 | 0.786  |
| -----         |  |       |       |        |
| P - A         |  |       |       |        |
| 8             |  | 0.421 | 0.318 | 0.556  |
| Sub-total     |  |       |       |        |
| D+L pooled ES |  | 0.421 | 0.318 | 0.556  |
| -----         |  |       |       |        |
| P - H         |  |       |       |        |
| 8             |  | 0.661 | 0.515 | 0.850  |
| Sub-total     |  |       |       |        |
| D+L pooled ES |  | 0.661 | 0.515 | 0.850  |
| -----         |  |       |       |        |
| M - B         |  |       |       |        |
| 11            |  | 0.932 | 0.464 | 1.870  |
| 12            |  | 0.442 | 0.212 | 0.922  |
| 13            |  | 1.272 | 0.963 | 1.679  |
| 14            |  | 1.097 | 0.939 | 1.281  |
| 19            |  | 2.471 | 0.588 | 10.381 |
| Sub-total     |  |       |       |        |
| D+L pooled ES |  | 1.050 | 0.794 | 1.388  |
| -----         |  |       |       |        |
| B - A         |  |       |       |        |
| 12            |  | 0.654 | 0.441 | 0.972  |
| 35            |  | 0.333 | 0.041 | 2.686  |
| 37            |  | 1.367 | 0.326 | 5.723  |
| 38            |  | 0.600 | 0.319 | 1.128  |
| 40            |  | 0.050 | 0.003 | 0.786  |
| 41            |  | 1.125 | 0.491 | 2.578  |
| 45            |  | 0.444 | 0.187 | 1.055  |
| 67            |  | 3.000 | 0.140 | 64.262 |
| 76            |  | 0.808 | 0.594 | 1.098  |
| Sub-total     |  |       |       |        |
| D+L pooled ES |  | 0.712 | 0.555 | 0.913  |
| -----         |  |       |       |        |
| M - A         |  |       |       |        |
| 12            |  | 0.289 | 0.149 | 0.562  |
| Sub-total     |  |       |       |        |
| D+L pooled ES |  | 0.289 | 0.149 | 0.562  |
| -----         |  |       |       |        |
| N - B         |  |       |       |        |
| 15            |  | 1.184 | 0.594 | 2.361  |
| Sub-total     |  |       |       |        |
| D+L pooled ES |  | 1.184 | 0.594 | 2.361  |
| -----         |  |       |       |        |
| F - C         |  |       |       |        |
| 20            |  | 0.894 | 0.421 | 1.901  |
| Sub-total     |  |       |       |        |
| D+L pooled ES |  | 0.894 | 0.421 | 1.901  |
| -----         |  |       |       |        |
| C - B         |  |       |       |        |
| 21            |  | 0.750 | 0.183 | 3.068  |
| 62            |  | 0.714 | 0.292 | 1.749  |
| 66            |  | 0.063 | 0.004 | 1.039  |
| Sub-total     |  |       |       |        |
| D+L pooled ES |  | 0.562 | 0.217 | 1.461  |
| -----         |  |       |       |        |
| D - B         |  |       |       |        |

|               |  |       |       |        |
|---------------|--|-------|-------|--------|
| 25            |  | 1.143 | 0.519 | 2.519  |
| 46            |  | 1.034 | 0.285 | 3.752  |
| 55            |  | 0.529 | 0.284 | 0.984  |
| 72            |  | 1.667 | 0.483 | 5.757  |
| 74            |  | 1.611 | 0.672 | 3.861  |
| Sub-total     |  |       |       |        |
| D+L pooled ES |  | 0.999 | 0.615 | 1.622  |
| -----         |  |       |       |        |
| D - C         |  |       |       |        |
| 26            |  | 1.000 | 0.717 | 1.395  |
| Sub-total     |  |       |       |        |
| D+L pooled ES |  | 1.000 | 0.717 | 1.395  |
| -----         |  |       |       |        |
| G - B         |  |       |       |        |
| 27            |  | 3.130 | 0.702 | 13.954 |
| 56            |  | 1.500 | 0.291 | 7.731  |
| Sub-total     |  |       |       |        |
| D+L pooled ES |  | 2.242 | 0.743 | 6.766  |
| -----         |  |       |       |        |
| K - A         |  |       |       |        |
| 28            |  | 1.061 | 0.658 | 1.710  |
| 54            |  | 0.842 | 0.585 | 1.212  |
| Sub-total     |  |       |       |        |
| D+L pooled ES |  | 0.917 | 0.686 | 1.225  |
| -----         |  |       |       |        |
| I - A         |  |       |       |        |
| 29            |  | 0.740 | 0.623 | 0.878  |
| Sub-total     |  |       |       |        |
| D+L pooled ES |  | 0.740 | 0.623 | 0.878  |
| -----         |  |       |       |        |
| G - A         |  |       |       |        |
| 30            |  | 0.400 | 0.100 | 1.599  |
| Sub-total     |  |       |       |        |
| D+L pooled ES |  | 0.400 | 0.100 | 1.599  |
| -----         |  |       |       |        |
| D - A         |  |       |       |        |
| 31            |  | 0.040 | 0.003 | 0.623  |
| 36            |  | 0.359 | 0.161 | 0.804  |
| Sub-total     |  |       |       |        |
| D+L pooled ES |  | 0.180 | 0.024 | 1.329  |
| -----         |  |       |       |        |
| L - A         |  |       |       |        |
| 34            |  | 0.473 | 0.244 | 0.916  |
| Sub-total     |  |       |       |        |
| D+L pooled ES |  | 0.473 | 0.244 | 0.916  |
| -----         |  |       |       |        |
| R - B         |  |       |       |        |
| 43            |  | 1.412 | 0.369 | 5.403  |
| 44            |  | 0.893 | 0.350 | 2.279  |
| 52            |  | 0.786 | 0.429 | 1.441  |
| 61            |  | 1.118 | 0.390 | 3.203  |
| Sub-total     |  |       |       |        |
| D+L pooled ES |  | 0.911 | 0.591 | 1.406  |
| -----         |  |       |       |        |
| K - D         |  |       |       |        |
| 49            |  | 1.010 | 0.861 | 1.185  |
| Sub-total     |  |       |       |        |
| D+L pooled ES |  | 1.010 | 0.861 | 1.185  |
| -----         |  |       |       |        |
| F - D         |  |       |       |        |
| 50            |  | 1.050 | 0.163 | 6.757  |
| Sub-total     |  |       |       |        |
| D+L pooled ES |  | 1.050 | 0.163 | 6.757  |
| -----         |  |       |       |        |
| F - B         |  |       |       |        |
| 51            |  | 3.000 | 0.127 | 70.829 |
| 64            |  | 0.547 | 0.149 | 2.007  |
| 68            |  | 3.000 | 0.348 | 25.870 |
| 70            |  | 0.968 | 0.446 | 2.102  |
| 71            |  | 0.522 | 0.011 | 24.698 |
| 73            |  | 4.000 | 0.504 | 31.736 |
| 75            |  | 1.000 | 0.021 | 47.380 |
| 76            |  | 1.000 | 0.718 | 1.393  |
| Sub-total     |  |       |       |        |
| D+L pooled ES |  | 1.018 | 0.763 | 1.358  |
| -----         |  |       |       |        |
| G - D         |  |       |       |        |
| 57            |  | 2.000 | 0.684 | 5.851  |



|               |  |       |       |        |
|---------------|--|-------|-------|--------|
| Sub-total     |  |       |       |        |
| D+L pooled ES |  | 2.000 | 0.684 | 5.851  |
| -----         |  |       |       |        |
| L - K         |  |       |       |        |
| 59            |  | 0.905 | 0.690 | 1.187  |
| Sub-total     |  |       |       |        |
| D+L pooled ES |  | 0.905 | 0.690 | 1.187  |
| -----         |  |       |       |        |
| E - D         |  |       |       |        |
| 63            |  | 0.480 | 0.125 | 1.837  |
| Sub-total     |  |       |       |        |
| D+L pooled ES |  | 0.480 | 0.125 | 1.837  |
| -----         |  |       |       |        |
| E - C         |  |       |       |        |
| 65            |  | 0.429 | 0.122 | 1.502  |
| Sub-total     |  |       |       |        |
| D+L pooled ES |  | 0.429 | 0.122 | 1.502  |
| -----         |  |       |       |        |
| F - A         |  |       |       |        |
| 76            |  | 0.808 | 0.594 | 1.098  |
| Sub-total     |  |       |       |        |
| D+L pooled ES |  | 0.808 | 0.594 | 1.098  |
| -----         |  |       |       |        |
| E - B         |  |       |       |        |
| 77            |  | 3.150 | 0.136 | 72.885 |
| Sub-total     |  |       |       |        |
| D+L pooled ES |  | 3.150 | 0.136 | 72.885 |
| -----         |  |       |       |        |

Test(s) of heterogeneity:

|       | Heterogeneity<br>statistic | degrees of<br>freedom | P     | I-squared** | Tau-squared |
|-------|----------------------------|-----------------------|-------|-------------|-------------|
| Q - I | 0.00                       | 0                     | .     | .%          | 0.0000      |
| J - A | 0.12                       | 1                     | 0.733 | 0.0%        | 0.0000      |
| O - A | 0.00                       | 0                     | .     | .%          | 0.0000      |
| O - J | 0.01                       | 1                     | 0.927 | 0.0%        | 0.0000      |
| H - A | 0.00                       | 0                     | .     | .%          | 0.0000      |
| P - A | 0.00                       | 0                     | .     | .%          | 0.0000      |
| P - H | 0.00                       | 0                     | .     | .%          | 0.0000      |
| M - B | 8.39                       | 4                     | 0.078 | 52.3%       | 0.0430      |
| B - A | 9.12                       | 8                     | 0.332 | 12.3%       | 0.0180      |
| M - A | 0.00                       | 0                     | .     | .%          | 0.0000      |
| N - B | 0.00                       | 0                     | .     | .%          | 0.0000      |
| F - C | 0.00                       | 0                     | .     | .%          | 0.0000      |
| C - B | 2.73                       | 2                     | 0.256 | 26.6%       | 0.2085      |
| D - B | 5.84                       | 4                     | 0.212 | 31.5%       | 0.0953      |
| D - C | 0.00                       | 0                     | .     | .%          | 0.0000      |
| G - B | 0.42                       | 1                     | 0.516 | 0.0%        | 0.0000      |
| K - A | 0.57                       | 1                     | 0.451 | 0.0%        | 0.0000      |
| I - A | 0.00                       | 0                     | .     | .%          | 0.0000      |
| G - A | 0.00                       | 0                     | .     | .%          | 0.0000      |
| D - A | 2.26                       | 1                     | 0.133 | 55.8%       | 1.3444      |
| L - A | 0.00                       | 0                     | .     | .%          | 0.0000      |
| R - B | 0.78                       | 3                     | 0.853 | 0.0%        | 0.0000      |
| K - D | 0.00                       | 0                     | .     | .%          | 0.0000      |
| F - D | 0.00                       | 0                     | .     | .%          | 0.0000      |
| F - B | 4.11                       | 7                     | 0.767 | 0.0%        | 0.0000      |
| G - D | 0.00                       | 0                     | .     | .%          | 0.0000      |
| L - K | 0.00                       | 0                     | .     | .%          | 0.0000      |
| E - D | 0.00                       | 0                     | .     | .%          | 0.0000      |
| E - C | 0.00                       | 0                     | .     | .%          | 0.0000      |
| F - A | 0.00                       | 0                     | .     | .%          | 0.0000      |
| E - B | 0.00                       | 0                     | .     | .%          | 0.0000      |

\*\* I-squared: the variation in ES attributable to heterogeneity)

### Net league table

|                         |                         |                         |                          |                         |                         |                         |                         |                         |                     |                     |                         |                          |                         |                         |                         |                         |                         |
|-------------------------|-------------------------|-------------------------|--------------------------|-------------------------|-------------------------|-------------------------|-------------------------|-------------------------|---------------------|---------------------|-------------------------|--------------------------|-------------------------|-------------------------|-------------------------|-------------------------|-------------------------|
| Fluphena<br>zine_LAI    | 0.96<br>(0.69,1.3<br>3) | 0.99<br>(0.78,1.2<br>5) | 0.51<br>(0.21,1.27)      | 1.07<br>(0.83,1.3<br>8) | 1.55<br>(0.78,3.0<br>8) | 0.93<br>(0.70,1.2<br>3) | 1.08<br>(0.84,1.3<br>8) | 0.69<br>(0.54,0.8<br>9) | 1.06<br>(0.83,1.35) | 0.91<br>(0.65,1.27) | 1.46<br>(1.22,1.7<br>5) | 1.09<br>(0.96,1.24<br>)  | 1.18<br>(0.59,2.3<br>6) | 0.89<br>(0.68,1.1<br>7) | 0.61<br>(0.44,0.8<br>6) | 0.85<br>(0.56,1.2<br>9) | 0.91<br>(0.59,1.4<br>1) |
| 1.05<br>(0.75,1.46<br>) | Flupenthi<br>xol_LAI    | 1.03<br>(0.78,1.3<br>8) | 0.54<br>(0.22,1.31)      | 1.12<br>(0.77,1.6<br>2) | 1.62<br>(0.78,3.3<br>8) | 0.97<br>(0.65,1.4<br>4) | 1.13<br>(0.78,1.6<br>4) | 0.72<br>(0.49,1.0<br>5) | 1.10<br>(0.81,1.51) | 0.95<br>(0.64,1.42) | 1.53<br>(1.09,2.1<br>3) | 1.14<br>(0.80,1.63<br>)  | 1.24<br>(0.58,2.6<br>6) | 0.93<br>(0.63,1.3<br>8) | 0.64<br>(0.42,0.9<br>9) | 0.89<br>(0.54,1.4<br>7) | 0.95<br>(0.55,1.6<br>4) |
| 1.01<br>(0.80,1.28<br>) | 0.97<br>(0.73,1.2<br>9) | Haloperi<br>dol_LAI     | 0.52<br>(0.21,1.26)      | 1.08<br>(0.79,1.4<br>7) | 1.57<br>(0.79,3.1<br>2) | 0.94<br>(0.69,1.2<br>8) | 1.09<br>(0.82,1.4<br>5) | 0.70<br>(0.52,0.9<br>3) | 1.07<br>(0.92,1.24) | 0.92<br>(0.69,1.23) | 1.48<br>(1.18,1.8<br>5) | 1.11<br>(0.85,1.45<br>)  | 1.20<br>(0.58,2.4<br>9) | 0.90<br>(0.67,1.2<br>7) | 0.62<br>(0.43,0.8<br>9) | 0.86<br>(0.55,1.3<br>4) | 0.92<br>(0.56,1.5<br>1) |
| 1.95<br>(0.79,4.85<br>) | 1.87<br>(0.77,4.5<br>5) | 1.93<br>(0.79,4.7<br>1) | (Zu)clopent<br>hixol_LAI | 2.09<br>(0.82,5.2<br>9) | 3.03<br>(0.99,9.2<br>9) | 1.81<br>(0.71,4.6<br>2) | 2.11<br>(0.83,5.3<br>3) | 1.35<br>(0.53,3.4<br>5) | 2.06<br>(0.84,5.08) | 1.78<br>(0.70,4.53) | 2.85<br>(1.15,7.0<br>9) | 2.14<br>(0.85,5.35<br>5) | 2.31<br>(0.74,7.2<br>3) | 1.74<br>(0.69,4.4<br>3) | 1.20<br>(0.46,3.1<br>1) | 1.66<br>(0.62,4.4<br>6) | 1.78<br>(0.65,4.8<br>8) |
| 0.94<br>(0.73,1.21<br>) | 0.89<br>(0.62,1.3<br>0) | 0.92<br>(0.68,1.2<br>6) | 0.48<br>(0.19,1.21)      | Pipothiiaz<br>ine_LAI   | 1.45<br>(0.71,2.9<br>8) | 0.87<br>(0.62,1.2<br>1) | 1.01<br>(0.74,1.3<br>8) | 0.64<br>(0.47,0.8<br>8) | 0.99<br>(0.72,1.35) | 0.85<br>(0.58,1.26) | 1.37<br>(1.06,1.7<br>7) | 1.02<br>(0.77,1.36<br>)  | 1.11<br>(0.53,2.3<br>1) | 0.84<br>(0.60,1.1<br>6) | 0.57<br>(0.39,0.8<br>4) | 0.80<br>(0.50,1.2<br>6) | 0.85<br>(0.52,1.4<br>1) |

|                         |                         |                         |                     |                         |                         |                         |                         |                         |                        |                        |                         |                         |                         |                         |                         |                         |                         |
|-------------------------|-------------------------|-------------------------|---------------------|-------------------------|-------------------------|-------------------------|-------------------------|-------------------------|------------------------|------------------------|-------------------------|-------------------------|-------------------------|-------------------------|-------------------------|-------------------------|-------------------------|
| 0.64<br>(0.33,1.27<br>) | 0.62<br>(0.30,1.2<br>8) | 0.64<br>(0.32,1.2<br>6) | 0.33<br>(0.11,1.01) | 0.69<br>(0.34,1.4<br>2) | Bromperi<br>dol_LAI     | 0.60<br>(0.29,1.2<br>2) | 0.69<br>(0.34,1.4<br>1) | 0.44<br>(0.22,0.9<br>0) | 0.68<br>(0.34,1.36)    | 0.59<br>(0.28,1.22)    | 0.94<br>(0.47,1.8<br>6) | 0.70<br>(0.35,1.41<br>) | 0.76<br>(0.29,2.0<br>1) | 0.57<br>(0.28,1.1<br>7) | 0.40<br>(0.19,0.8<br>3) | 0.55<br>(0.25,1.2<br>0) | 0.59<br>(0.26,1.3<br>2) |
| 1.08<br>(0.82,1.42<br>) | 1.03<br>(0.69,1.5<br>3) | 1.06<br>(0.78,1.4<br>5) | 0.55<br>(0.22,1.40) | 1.15<br>(0.82,1.6<br>1) | 1.67<br>(0.82,3.4<br>3) | Olanzapi<br>ne_LAI      | 1.16<br>(0.89,1.5<br>3) | 0.74<br>(0.56,0.9<br>8) | 1.14<br>(0.84,1.54)    | 0.98<br>(0.67,1.43)    | 1.57<br>(1.27,1.9<br>4) | 1.18<br>(0.87,1.59<br>) | 1.28<br>(0.61,2.6<br>8) | 0.96<br>(0.72,1.2<br>9) | 0.66<br>(0.51,0.8<br>5) | 0.92<br>(0.59,1.4<br>1) | 0.98<br>(0.59,1.6<br>4) |
| 0.93<br>(0.72,1.19<br>) | 0.89<br>(0.61,1.2<br>9) | 0.92<br>(0.69,1.2<br>2) | 0.47<br>(0.19,1.20) | 0.99<br>(0.73,1.3<br>3) | 1.44<br>(0.71,2.9<br>2) | 0.86<br>(0.66,1.1<br>3) | Risperid<br>one_LAI     | 0.64<br>(0.50,0.8<br>2) | 0.98<br>(0.74,1.29)    | 0.84<br>(0.59,1.21)    | 1.35<br>(1.14,1.6<br>0) | 1.01<br>(0.77,1.34<br>) | 1.10<br>(0.53,2.2<br>8) | 0.83<br>(0.64,1.0<br>8) | 0.57<br>(0.41,0.7<br>9) | 0.79<br>(0.56,1.1<br>1) | 0.84<br>(0.51,1.3<br>9) |
| 1.45<br>(1.13,1.86<br>) | 1.39<br>(0.95,2.0<br>2) | 1.43<br>(1.08,1.9<br>1) | 0.74<br>(0.29,1.88) | 1.55<br>(1.14,2.1<br>2) | 2.25<br>(1.11,4.5<br>7) | 1.35<br>(1.02,1.7<br>7) | 1.57<br>(1.23,2.0<br>0) | Aripipraz<br>ole_LAI    | 1.53<br>(1.16,2.02)    | 1.32<br>(0.93,1.89)    | 2.12<br>(1.78,2.5<br>2) | 1.59<br>(1.20,2.10<br>) | 1.72<br>(0.82,3.5<br>8) | 1.29<br>(1.08,1.5<br>6) | 0.89<br>(0.64,1.2<br>7) | 1.24<br>(0.81,1.8<br>8) | 1.32<br>(0.80,2.1<br>8) |
| 0.95<br>(0.74,1.21<br>) | 0.91<br>(0.66,1.2<br>4) | 0.94<br>(0.81,1.0<br>9) | 0.49<br>(0.20,1.20) | 1.01<br>(0.74,1.3<br>8) | 1.47<br>(0.74,2.9<br>4) | 0.88<br>(0.65,1.1<br>9) | 1.02<br>(0.78,1.3<br>5) | 0.65<br>(0.49,0.8<br>6) | Paliperido<br>ne_LAI_1 | 0.86<br>(0.67,1.11)    | 1.38<br>(1.11,1.7<br>2) | 1.04<br>(0.79,1.36<br>) | 1.12<br>(0.54,2.3<br>3) | 0.85<br>(0.63,1.1<br>3) | 0.58<br>(0.41,0.8<br>3) | 0.81<br>(0.52,1.2<br>5) | 0.86<br>(0.53,1.4<br>2) |
| 1.10<br>(0.78,1.53<br>) | 1.05<br>(0.71,1.5<br>6) | 1.08<br>(0.81,1.4<br>5) | 0.56<br>(0.22,1.43) | 1.17<br>(0.80,1.7<br>2) | 1.70<br>(0.82,3.5<br>4) | 1.02<br>(0.70,1.4<br>8) | 1.18<br>(0.83,1.6<br>9) | 0.76<br>(0.53,1.0<br>8) | 1.16<br>(0.90,1.49)    | Paliperido<br>ne_LAI_3 | 1.60<br>(1.17,2.1<br>9) | 1.20<br>(0.84,1.71<br>) | 1.30<br>(0.60,2.8<br>0) | 0.98<br>(0.68,1.4<br>2) | 0.67<br>(0.44,1.0<br>2) | 0.93<br>(0.57,1.5<br>2) | 1.00<br>(0.58,1.7<br>3) |
| 0.69<br>(0.57,0.82<br>) | 0.66<br>(0.47,0.9<br>1) | 0.68<br>(0.54,0.8<br>5) | 0.35<br>(0.14,0.87) | 0.73<br>(0.57,0.9<br>2) | 1.06<br>(0.54,2.1<br>1) | 0.64<br>(0.52,0.7<br>9) | 0.74<br>(0.62,0.8<br>8) | 0.47<br>(0.40,0.5<br>6) | 0.72<br>(0.58,0.90)    | 0.62<br>(0.46,0.85)    | Placebo                 | 0.75<br>(0.60,0.93<br>) | 0.81<br>(0.40,1.6<br>6) | 0.61<br>(0.50,0.7<br>5) | 0.42<br>(0.32,0.5<br>6) | 0.58<br>(0.40,0.8<br>5) | 0.62<br>(0.39,1.0<br>0) |
| 0.91<br>(0.80,1.04<br>) | 0.87<br>(0.61,1.2<br>8) | 0.90<br>(0.69,1.1<br>8) | 0.47<br>(0.19,1.17) | 0.98<br>(0.74,1.3<br>0) | 1.42<br>(0.71,2.8<br>5) | 0.85<br>(0.63,1.1<br>6) | 0.99<br>(0.75,1.3<br>0) | 0.63<br>(0.48,0.8<br>3) | 0.97<br>(0.73,1.27)    | 0.83<br>(0.58,1.19)    | 1.33<br>(1.07,1.6<br>6) | Phenotiaz<br>ines_OS    | 1.08<br>(0.54,2.1<br>9) | 0.82<br>(0.61,1.1<br>1) | 0.56<br>(0.39,0.8<br>0) | 0.78<br>(0.50,1.2<br>0) | 0.83<br>(0.53,1.3<br>1) |
| 0.84<br>(0.42,1.68<br>) | 0.81<br>(0.38,1.7<br>4) | 0.83<br>(0.40,1.7<br>3) | 0.43<br>(0.14,1.36) | 0.90<br>(0.43,1.8<br>8) | 1.31<br>(0.50,3.4<br>6) | 0.78<br>(0.37,1.6<br>5) | 0.91<br>(0.44,1.9<br>0) | 0.58<br>(0.28,1.2<br>1) | 0.89<br>(0.43,1.85)    | 0.77<br>(0.36,1.66)    | 1.23<br>(0.60,2.5<br>1) | 0.92<br>(0.46,1.86<br>) | Haloperi<br>dol_OS      | 0.75<br>(0.36,1.5<br>8) | 0.52<br>(0.24,1.1<br>2) | 0.72<br>(0.32,1.6<br>1) | 0.77<br>(0.34,1.7<br>4) |
| 1.12<br>(0.86,1.47<br>) | 1.07<br>(0.73,1.5<br>8) | 1.11<br>(0.82,1.5<br>0) | 0.57<br>(0.23,1.46) | 1.20<br>(0.86,1.6<br>6) | 1.74<br>(0.85,3.5<br>5) | 1.04<br>(0.78,1.3<br>9) | 1.21<br>(0.93,1.5<br>7) | 0.77<br>(0.64,0.9<br>3) | 1.18<br>(0.88,1.59)    | 1.02<br>(0.71,1.48)    | 1.64<br>(1.34,2.0<br>0) | 1.23<br>(0.91,1.65<br>) | 1.33<br>(0.63,2.7<br>8) | Aripipraz<br>ole_OS     | 0.69<br>(0.49,0.9<br>7) | 0.95<br>(0.62,1.4<br>6) | 1.02<br>(0.61,1.7<br>0) |
| 1.63<br>(1.17,2.27<br>) | 1.56<br>(1.01,2.4<br>0) | 1.61<br>(1.12,2.3<br>0) | 0.83<br>(0.32,2.16) | 1.74<br>(1.19,2.5<br>4) | 2.53<br>(1.21,5.3<br>0) | 1.51<br>(1.18,1.9<br>4) | 1.76<br>(1.27,2.4<br>4) | 1.12<br>(0.81,1.5<br>6) | 1.72<br>(1.21,2.45)    | 1.48<br>(0.98,2.26)    | 2.38<br>(1.80,3.1<br>4) | 1.78<br>(1.25,2.54<br>) | 1.93<br>(0.90,4.1<br>5) | 1.45<br>(1.03,2.0<br>5) | Olanzapi<br>ne_OS       | 1.39<br>(0.87,2.2<br>2) | 1.48<br>(0.86,2.5<br>6) |
| 1.17<br>(0.77,1.79<br>) | 1.12<br>(0.68,1.8<br>6) | 1.16<br>(0.75,1.8<br>0) | 0.60<br>(0.22,1.61) | 1.26<br>(0.79,1.9<br>8) | 1.82<br>(0.83,3.9<br>9) | 1.09<br>(0.71,1.6<br>8) | 1.27<br>(0.90,1.7<br>8) | 0.81<br>(0.53,1.2<br>3) | 1.24<br>(0.80,1.92)    | 1.07<br>(0.66,1.75)    | 1.71<br>(1.17,2.5<br>0) | 1.28<br>(0.83,1.99<br>) | 1.39<br>(0.62,3.1<br>2) | 1.05<br>(0.68,1.6<br>1) | 0.72<br>(0.45,1.1<br>5) | Risperid<br>one_OS      | 1.07<br>(0.59,1.9<br>6) |
| 1.10<br>(0.71,1.69<br>) | 1.05<br>(0.61,1.8<br>1) | 1.08<br>(0.66,1.7<br>8) | 0.56<br>(0.20,1.54) | 1.17<br>(0.71,1.9<br>4) | 1.70<br>(0.76,3.8<br>3) | 1.02<br>(0.61,1.7<br>1) | 1.18<br>(0.72,1.9<br>5) | 0.76<br>(0.46,1.2<br>5) | 1.16<br>(0.70,1.90)    | 1.00<br>(0.58,1.73)    | 1.60<br>(1.00,2.5<br>6) | 1.20<br>(0.76,1.89<br>) | 1.30<br>(0.58,2.9<br>4) | 0.98<br>(0.59,1.6<br>3) | 0.67<br>(0.39,1.1<br>6) | 0.93<br>(0.51,1.7<br>1) | DBP_OS                  |

Net league table: head-to-head comparisons. Relative risks (RRs) and 95% confidence intervals (CIs) are reported. RRs lower than 1 favour the column-defining treatment. Statistically significant results are highlighted in grey. LAI=long-acting antipsychotics

#### Evaluation of heterogeneity and incoherence

##### Overall heterogeneity

Estimated between-studies SD: .00008013

##### Overall incoherence

Design-by-treatment test: P = 1.000

##### Loop-specific heterogeneity

\* 18 triangular loops found

Note: Heterogeneity of loop A-D-F cannot be estimated due to insufficient observations - set equal to 0

Note: Heterogeneity of loop A-D-G cannot be estimated due to insufficient observations - set equal to 0

Note: Heterogeneity of loop A-H-P cannot be estimated due to insufficient observations - set equal to 0

Note: Heterogeneity of loop A-J-O cannot be estimated due to insufficient observations - set equal to 0

Note: Heterogeneity of loop A-K-L cannot be estimated due to insufficient observations - set equal to 0

Note: Heterogeneity of loop C-D-E cannot be estimated due to insufficient observations - set equal to 0

Note: Heterogeneity of loop C-D-F cannot be estimated due to insufficient observations - set equal to 0

Evaluation of inconsistency using loop-specific heterogeneity estimates:

| Loop  | ROR    | z_value | p_value | CI_95         | Loop_Heterog_tau2 |
|-------|--------|---------|---------|---------------|-------------------|
| B-C-E | 13.068 | 1.236   | 0.217   | (1.00,770.41) | 0.208             |
| B-D-E | 6.572  | 1.038   | 0.299   | (1.00,229.96) | 0.095             |
| A-B-G | 4.015  | 1.496   | 0.135   | (1.00,24.79)  | 0.008             |
| A-D-K | 3.144  | 1.963   | 0.050   | (1.00,9.87)   | 0.037             |
| A-B-M | 2.617  | 1.875   | 0.061   | (1.00,7.15)   | 0.044             |
| A-D-F | 2.548  | 0.899   | 0.369   | (1.00,19.58)  | 0.000             |
| A-B-D | 2.370  | 1.579   | 0.114   | (1.00,6.91)   | 0.051             |
| B-C-F | 1.853  | 1.111   | 0.266   | (1.00,5.50)   | 0.000             |
| A-K-L | 1.756  | 1.432   | 0.152   | (1.00,3.79)   | 0.000             |
| B-C-D | 1.723  | 0.860   | 0.390   | (1.00,5.96)   | 0.113             |
| A-D-G | 1.510  | 0.421   | 0.673   | (1.00,10.26)  | 0.000             |
| A-B-F | 1.205  | 0.722   | 0.470   | (1.00,2.00)   | 0.000             |
| C-D-F | 1.174  | 0.154   | 0.877   | (1.00,8.99)   | 0.000             |
| B-D-G | 1.139  | 0.149   | 0.882   | (1.00,6.30)   | 0.060             |
| C-D-E | 1.120  | 0.119   | 0.905   | (1.00,7.25)   | 0.000             |
| B-D-F | 1.038  | 0.038   | 0.969   | (1.00,7.10)   | 0.000             |
| A-J-O | 1.014  | 0.065   | 0.948   | (1.00,1.53)   | 0.000             |

| A-H-P | . | . | . | | 0.000 |  
 +-----+-----+-----+-----+-----+-----+

\*\*\* Note: Loop A-H-P is formed only by multi-arm trial(s) - Consistent by definition

Consistency between direct and indirect estimates

| Side  | Direct           |                 | Indirect         |                 | Difference       |                 |              |
|-------|------------------|-----------------|------------------|-----------------|------------------|-----------------|--------------|
|       | Coef.            | Std. Err.       | Coef.            | Std. Err.       | Coef.            | Std. Err.       | P> z         |
| A B   | -.3605799        | .1256708        | -.5923288        | .2954392        | .2317489         | .3182475        | 0.466        |
| A D   | <b>-1.197495</b> | <b>.3944845</b> | <b>-.3142595</b> | <b>.1205541</b> | <b>-.8832353</b> | <b>.412494</b>  | <b>0.032</b> |
| A F   | -.2070025        | .1614533        | -.5493932        | .2410853        | .3423907         | .2858469        | 0.231        |
| A G   | -.9162907        | .7071068        | .3790718         | .4020236        | -1.295363        | .8134021        | 0.111        |
| A H   | .                | .               | .                | .               | .                | .               | .            |
| A I * | -.3015421        | .0874194        | .1114906         | 67.94919        | -.4130327        | 67.94924        | 0.995        |
| A J * | -.7507404        | .1202771        | -.7506526        | .4620057        | -.0000878        | .4816506        | 1.000        |
| A K   | <b>-.0867661</b> | <b>.1476732</b> | <b>-.6217189</b> | <b>.1655885</b> | <b>.5349528</b>  | <b>.2218714</b> | <b>0.016</b> |
| A L   | -.7490276        | .3381692        | -.3893421        | .1857617        | -.3596855        | .3858315        | 0.351        |
| A M   | <b>-.934476</b>  | <b>.2765295</b> | <b>-.1391581</b> | <b>.1254484</b> | <b>-.7953179</b> | <b>.3119863</b> | <b>0.011</b> |
| A O   | -.4789558        | .1616751        | -.527074         | .2498832        | .0481183         | .2975476        | 0.872        |
| A P   | .                | .               | .                | .               | .                | .               | .            |
| B C   | -.4875908        | .3723537        | .0697634         | .1894825        | -.5573542        | .4177924        | 0.182        |
| B D   | -.0685959        | .1962246        | .0229166         | .1537193        | -.0915125        | .2492664        | 0.714        |
| B E   | 1.147425         | 1.602818        | -.835845         | .4852721        | 1.98327          | 1.674671        | 0.236        |
| B F   | .0178145         | .1469954        | .2346615         | .2746772        | -.216847         | .311537         | 0.486        |
| B G   | .8073326         | .5635957        | .2130861         | .4436771        | .5942465         | .7172826        | 0.407        |
| B M * | .0975358         | .0665214        | -.6105479        | .4209862        | .7080837         | .4207329        | 0.092        |
| B N * | .1690245         | .3520984        | .745857          | 178.3433        | -.5768325        | 178.3438        | 0.997        |
| B R * | -.0928124        | .2212651        | .769197          | 45.18116        | -.8620094        | 45.18161        | 0.985        |
| C D   | 1.17e-08         | .1716716        | .1242428         | .293474         | -.1242428        | .3399978        | 0.715        |
| C E   | -.8473082        | .6399391        | -.3971927        | .6462477        | -.4501156        | .9094784        | 0.621        |
| C F   | -.1115893        | .390753         | .2051295         | .2551558        | -.3167187        | .466682         | 0.497        |
| D E   | -.733976         | .68487          | -.5969997        | .6087281        | -.1369763        | .9162932        | 0.881        |
| D F   | .0487902         | .9499373        | .0787977         | .1593701        | -.0300075        | .9632133        | 0.975        |
| D G   | .6931593         | .5477174        | .2864492         | .4545841        | .4067101         | .711796         | 0.568        |
| D K   | .0099772         | .0815686        | .4582802         | .21595          | -.448303         | .2308416        | 0.052        |
| H P   | .                | .               | .                | .               | .                | .               | .            |
| I Q * | -.2373618        | .1721132        | .5877531         | 136.3318        | -.8251148        | 136.3319        | 0.995        |
| J O * | .2480971         | .1253461        | .3660116         | .4430287        | -.1179145        | .4639487        | 0.799        |
| K L   | -.0993212        | .1407872        | -.4590007        | .3592355        | .3596796         | .3858386        | 0.351        |

\* Warning: all the evidence about these contrasts comes from the trials which directly compare them.

Funnel plot

Not applicable: no comparisons with 10 one more studies.

## Supplement N - Sensitivity analysis: acceptability (excluding trials comparing LAIs with placebo)

### Treatment codes

|                      |   |
|----------------------|---|
| Fluphenazine LAI     | A |
| Flupenthixol LAI     | B |
| Haloperidol LAI      | C |
| (Zu)clopenthixol LAI | D |
| Pipothiazine LAI     | E |
| Bromperidol LAI      | F |
| Perphenazine LAI     | G |
| Olanzapine LAI       | H |
| Risperidone LAI      | I |
| Aripiprazole LAI     | J |
| Paliperidone LAI-1   | K |
| Paliperidone LAI-3   | L |
| Phenothiazines OS    | M |
| Haloperidol OS       | N |
| Aripiprazole OS      | O |
| Olanzapine OS        | P |
| Risperidone OS       | Q |
| Quetiapine OS        | R |
| Paliperidone OS      | S |
| DBP_OS               | T |

### Network map

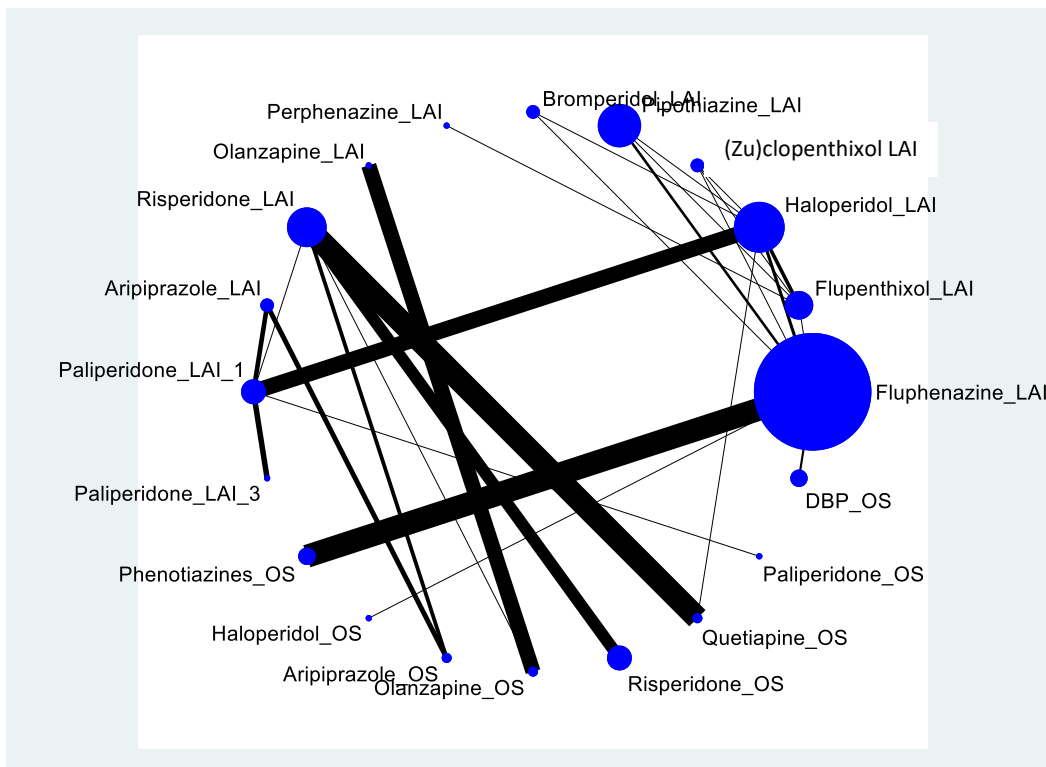

### Pairwise meta-analysis

| Study | ES    | [95% Conf. Interval] |
|-------|-------|----------------------|
| Q - I |       |                      |
| 1     | 0.789 | 0.563 1.105          |
| 2     | 0.091 | 0.005 1.562          |

|       |               |       |       |        |
|-------|---------------|-------|-------|--------|
| 3     |               | 1.231 | 0.677 | 2.237  |
| 4     |               | 1.147 | 0.606 | 2.173  |
| 5     |               | 0.754 | 0.569 | 0.999  |
| 58    |               | 0.954 | 0.540 | 1.687  |
|       | Sub-total     |       |       |        |
|       | D+L pooled ES | 0.854 | 0.694 | 1.051  |
| ----- |               |       |       |        |
| O - J |               |       |       |        |
| 7     |               | 1.294 | 0.972 | 1.722  |
|       | Sub-total     |       |       |        |
|       | D+L pooled ES | 1.294 | 0.972 | 1.722  |
| ----- |               |       |       |        |
| P - H |               |       |       |        |
| 9     |               | 0.951 | 0.808 | 1.120  |
|       | Sub-total     |       |       |        |
|       | D+L pooled ES | 0.951 | 0.808 | 1.120  |
| ----- |               |       |       |        |
| M - A |               |       |       |        |
| 11    |               | 0.932 | 0.464 | 1.870  |
| 13    |               | 1.272 | 0.963 | 1.679  |
| 14    |               | 1.097 | 0.939 | 1.281  |
| 19    |               | 2.471 | 0.588 | 10.381 |
|       | Sub-total     |       |       |        |
|       | D+L pooled ES | 1.136 | 0.995 | 1.297  |
| ----- |               |       |       |        |
| N - A |               |       |       |        |
| 15    |               | 1.184 | 0.594 | 2.361  |
|       | Sub-total     |       |       |        |
|       | D+L pooled ES | 1.184 | 0.594 | 2.361  |
| ----- |               |       |       |        |
| R - C |               |       |       |        |
| 16    |               | 1.263 | 0.622 | 2.566  |
|       | Sub-total     |       |       |        |
|       | D+L pooled ES | 1.263 | 0.622 | 2.566  |
| ----- |               |       |       |        |
| R - I |               |       |       |        |
| 17    |               | 1.219 | 1.067 | 1.392  |
|       | Sub-total     |       |       |        |
|       | D+L pooled ES | 1.219 | 1.067 | 1.392  |
| ----- |               |       |       |        |
| O - I |               |       |       |        |
| 18    |               | 0.959 | 0.693 | 1.329  |
|       | Sub-total     |       |       |        |
|       | D+L pooled ES | 0.959 | 0.693 | 1.329  |
| ----- |               |       |       |        |
| E - B |               |       |       |        |
| 20    |               | 0.894 | 0.421 | 1.901  |
|       | Sub-total     |       |       |        |
|       | D+L pooled ES | 0.894 | 0.421 | 1.901  |
| ----- |               |       |       |        |
| B - A |               |       |       |        |
| 21    |               | 0.750 | 0.183 | 3.068  |
| 62    |               | 0.714 | 0.292 | 1.749  |
| 66    |               | 0.063 | 0.004 | 1.039  |
|       | Sub-total     |       |       |        |
|       | D+L pooled ES | 0.562 | 0.217 | 1.461  |
| ----- |               |       |       |        |
| K - J |               |       |       |        |
| 23    |               | 1.342 | 0.998 | 1.806  |
| 24    |               | 0.981 | 0.020 | 48.494 |
|       | Sub-total     |       |       |        |
|       | D+L pooled ES | 1.340 | 0.997 | 1.801  |
| ----- |               |       |       |        |
| C - A |               |       |       |        |
| 25    |               | 1.143 | 0.519 | 2.519  |
| 46    |               | 1.034 | 0.285 | 3.752  |
| 47    |               | 4.545 | 0.247 | 83.699 |
| 55    |               | 0.529 | 0.284 | 0.984  |
| 60    |               | 0.635 | 0.210 | 1.921  |
| 72    |               | 1.667 | 0.483 | 5.757  |
| 74    |               | 1.611 | 0.672 | 3.861  |
|       | Sub-total     |       |       |        |
|       | D+L pooled ES | 0.961 | 0.631 | 1.463  |
| ----- |               |       |       |        |
| C - B |               |       |       |        |
| 26    |               | 1.000 | 0.717 | 1.395  |
|       | Sub-total     |       |       |        |
|       | D+L pooled ES | 1.000 | 0.717 | 1.395  |

|               |       |       |        |
|---------------|-------|-------|--------|
| -----         |       |       |        |
| F - A         |       |       |        |
| 27            | 3.130 | 0.702 | 13.954 |
| 56            | 1.500 | 0.291 | 7.731  |
| Sub-total     |       |       |        |
| D+L pooled ES | 2.242 | 0.743 | 6.766  |
| -----         |       |       |        |
| S - K         |       |       |        |
| 32            | 1.333 | 0.321 | 5.538  |
| Sub-total     |       |       |        |
| D+L pooled ES | 1.333 | 0.321 | 5.538  |
| -----         |       |       |        |
| E - A         |       |       |        |
| 33            | 2.007 | 0.747 | 5.391  |
| 51            | 3.000 | 0.127 | 70.829 |
| 53            | 1.001 | 0.532 | 1.885  |
| 64            | 0.547 | 0.149 | 2.007  |
| 68            | 3.000 | 0.348 | 25.870 |
| 70            | 0.968 | 0.446 | 2.102  |
| 71            | 0.522 | 0.011 | 24.698 |
| 73            | 4.000 | 0.504 | 31.736 |
| 75            | 1.000 | 0.021 | 47.380 |
| Sub-total     |       |       |        |
| D+L pooled ES | 1.155 | 0.779 | 1.712  |
| -----         |       |       |        |
| K - I         |       |       |        |
| 42            | 0.914 | 0.304 | 2.752  |
| Sub-total     |       |       |        |
| D+L pooled ES | 0.914 | 0.304 | 2.752  |
| -----         |       |       |        |
| T - A         |       |       |        |
| 43            | 1.412 | 0.369 | 5.403  |
| 44            | 0.893 | 0.350 | 2.279  |
| 52            | 0.786 | 0.429 | 1.441  |
| 61            | 1.118 | 0.390 | 3.203  |
| Sub-total     |       |       |        |
| D+L pooled ES | 0.911 | 0.591 | 1.406  |
| -----         |       |       |        |
| P - I         |       |       |        |
| 48            | 1.125 | 0.546 | 2.318  |
| Sub-total     |       |       |        |
| D+L pooled ES | 1.125 | 0.546 | 2.318  |
| -----         |       |       |        |
| K - C         |       |       |        |
| 49            | 1.010 | 0.861 | 1.185  |
| Sub-total     |       |       |        |
| D+L pooled ES | 1.010 | 0.861 | 1.185  |
| -----         |       |       |        |
| E - C         |       |       |        |
| 50            | 1.050 | 0.163 | 6.757  |
| Sub-total     |       |       |        |
| D+L pooled ES | 1.050 | 0.163 | 6.757  |
| -----         |       |       |        |
| F - C         |       |       |        |
| 57            | 2.000 | 0.684 | 5.851  |
| Sub-total     |       |       |        |
| D+L pooled ES | 2.000 | 0.684 | 5.851  |
| -----         |       |       |        |
| L - K         |       |       |        |
| 59            | 0.905 | 0.690 | 1.187  |
| Sub-total     |       |       |        |
| D+L pooled ES | 0.905 | 0.690 | 1.187  |
| -----         |       |       |        |
| D - C         |       |       |        |
| 63            | 0.480 | 0.125 | 1.837  |
| Sub-total     |       |       |        |
| D+L pooled ES | 0.480 | 0.125 | 1.837  |
| -----         |       |       |        |
| D - B         |       |       |        |
| 65            | 0.429 | 0.122 | 1.502  |
| Sub-total     |       |       |        |
| D+L pooled ES | 0.429 | 0.122 | 1.502  |
| -----         |       |       |        |
| G - B         |       |       |        |
| 69            | 0.500 | 0.050 | 4.978  |
| Sub-total     |       |       |        |
| D+L pooled ES | 0.500 | 0.050 | 4.978  |
| -----         |       |       |        |

D - A

|               |  |       |       |        |
|---------------|--|-------|-------|--------|
| 77            |  | 3.150 | 0.136 | 72.885 |
| Sub-total     |  |       |       |        |
| D+L pooled ES |  | 3.150 | 0.136 | 72.885 |

Test(s) of heterogeneity:

|       | Heterogeneity statistic | degrees of freedom | P     | I-squared** | Tau-squared |
|-------|-------------------------|--------------------|-------|-------------|-------------|
| Q - I | 5.73                    | 5                  | 0.333 | 12.7%       | 0.0090      |
| O - J | 0.00                    | 0                  | .     | .%          | 0.0000      |
| P - H | 0.00                    | 0                  | .     | .%          | 0.0000      |
| M - A | 2.27                    | 3                  | 0.519 | 0.0%        | 0.0000      |
| N - A | 0.00                    | 0                  | .     | .%          | 0.0000      |
| R - C | 0.00                    | 0                  | .     | .%          | 0.0000      |
| R - I | 0.00                    | 0                  | .     | .%          | 0.0000      |
| O - I | 0.00                    | 0                  | .     | .%          | 0.0000      |
| E - B | 0.00                    | 0                  | .     | .%          | 0.0000      |
| B - A | 2.73                    | 2                  | 0.256 | 26.6%       | 0.2085      |
| K - J | 0.02                    | 1                  | 0.875 | 0.0%        | 0.0000      |
| C - A | 7.43                    | 6                  | 0.283 | 19.2%       | 0.0612      |
| C - B | 0.00                    | 0                  | .     | .%          | 0.0000      |
| F - A | 0.42                    | 1                  | 0.516 | 0.0%        | 0.0000      |
| S - K | 0.00                    | 0                  | .     | .%          | 0.0000      |
| E - A | 5.52                    | 8                  | 0.701 | 0.0%        | 0.0000      |
| K - I | 0.00                    | 0                  | .     | .%          | 0.0000      |
| T - A | 0.78                    | 3                  | 0.853 | 0.0%        | 0.0000      |
| P - I | 0.00                    | 0                  | .     | .%          | 0.0000      |
| K - C | 0.00                    | 0                  | .     | .%          | 0.0000      |
| E - C | 0.00                    | 0                  | .     | .%          | 0.0000      |
| F - C | 0.00                    | 0                  | .     | .%          | 0.0000      |
| L - K | 0.00                    | 0                  | .     | .%          | 0.0000      |
| D - C | 0.00                    | 0                  | .     | .%          | 0.0000      |
| D - B | 0.00                    | 0                  | .     | .%          | 0.0000      |
| G - B | 0.00                    | 0                  | .     | .%          | 0.0000      |
| D - A | 0.00                    | 0                  | .     | .%          | 0.0000      |

\*\* I-squared: the variation in ES attributable to heterogeneity)

**Net league table**

|                   |                  |                  |                         |                   |                   |                   |                  |                  |                  |                  |                  |                   |                  |                  |                  |                  |                  |                   |                   |
|-------------------|------------------|------------------|-------------------------|-------------------|-------------------|-------------------|------------------|------------------|------------------|------------------|------------------|-------------------|------------------|------------------|------------------|------------------|------------------|-------------------|-------------------|
| Fluphenazine_L AI | 0.91 (0.63,1.31) | 0.92 (0.68,1.25) | 0.49 (0.19,1.22)        | 1.07 (0.75,1.52)  | 2.03 (0.92,4.5)   | 0.46 (0.04,6.6)   | 1.13 (0.46,2.78) | 0.95 (0.57,1.59) | 0.70 (0.45,1.08) | 0.93 (0.66,1.31) | 0.84 (0.55,1.3)  | 1.14 (0.99,1.30)  | 1.18 (0.99,1.36) | 0.91 (0.56,1.47) | 1.07 (0.44,2.60) | 0.80 (0.47,1.38) | 1.16 (0.69,1.95) | 1.24 (0.29,5.38)  | 0.91 (0.59,1.41)  |
| 1.10 (0.77,1.58)  | Flupentixol_L AI | 1.01 (0.76,1.36) | 0.53 (0.22,1.30)        | 1.17 (0.75,1.8)   | 2.23 (0.98,5.07)  | 0.50 (0.05,4.98)  | 1.24 (0.51,3.04) | 1.05 (0.63,1.73) | 0.77 (0.50,1.18) | 1.02 (0.73,1.42) | 0.93 (0.60,1.42) | 1.25 (0.85,1.83)  | 1.30 (0.60,2.83) | 1.00 (0.62,1.61) | 1.18 (0.49,2.85) | 0.88 (0.52,1.51) | 1.28 (0.77,2.13) | 1.37 (0.32,5.89)  | 1.00 (0.57,1.76)  |
| 1.08 (0.80,1.47)  | 0.99 (0.74,1.32) | Haloperidol_L AI | 0.53 (0.22,1.22)        | 1.16 (0.76,1.77)  | 2.20 (1.00,4.81)  | 0.49 (0.05,5.00)  | 1.22 (0.52,2.85) | 1.03 (0.69,1.56) | 0.76 (0.56,1.03) | 1.01 (0.86,1.17) | 0.91 (0.67,1.22) | 1.23 (0.88,1.72)  | 1.28 (0.60,2.73) | 0.99 (0.68,1.43) | 1.16 (0.51,2.67) | 0.87 (0.55,1.36) | 1.26 (0.83,1.91) | 1.35 (0.32,5.64)  | 0.99 (0.58,1.68)  |
| 2.06 (0.82,5.18)  | 1.88 (0.77,4.57) | 1.90 (0.74,4.64) | (Zuclophenanthixol_L AI | 2.20 (0.84,5.78)  | 4.18 (1.28,13.61) | 0.94 (0.08,11.03) | 2.32 (0.68,7.96) | 1.97 (0.74,5.5)  | 1.44 (0.56,3.71) | 1.92 (0.78,4.6)  | 1.74 (0.68,4.48) | 2.34 (0.92,5.72)  | 2.44 (0.77,7.93) | 1.87 (0.71,4.49) | 2.21 (0.65,7.36) | 1.65 (0.61,4.42) | 2.40 (0.89,6.42) | 2.56 (0.47,13.85) | 1.88 (0.68,5.21)  |
| 0.94 (0.66,1.33)  | 0.85 (0.55,1.33) | 0.86 (0.56,1.32) | 0.45 (0.17,1.19)        | Pipothiazine_L AI | 1.90 (0.81,4.45)  | 0.43 (0.04,4.3)   | 1.06 (0.41,2.73) | 0.89 (0.49,1.61) | 0.65 (0.39,1.11) | 0.87 (0.55,1.38) | 0.79 (0.47,1.34) | 1.06 (0.73,1.55)  | 1.11 (0.51,2.41) | 0.85 (0.48,1.50) | 1.00 (0.39,2.66) | 0.75 (0.40,1.40) | 1.09 (0.60,1.98) | 1.16 (0.26,5.19)  | 0.85 (0.49,1.49)  |
| 0.49 (0.22,1.08)  | 0.45 (0.20,1.02) | 0.45 (0.21,1.00) | 0.24 (0.07,0.78)        | Bromperidol_L AI  | 0.22 (0.02,2.3)   | 0.56 (0.05,8.58)  | 0.47 (0.18,1.76) | 0.46 (0.19,1.4)  | 0.34 (0.15,0.80) | 0.46 (0.21,1.02) | 0.42 (0.18,0.97) | 0.56 (0.25,1.24)  | 0.58 (0.21,1.66) | 0.45 (0.19,1.07) | 0.53 (0.17,1.66) | 0.40 (0.16,0.9)  | 0.57 (0.24,1.39) | 0.61 (0.12,3.14)  | 0.45 (0.18,1.10)  |
| 2.20 (0.21,22.50) | 2.00 (0.20,9.91) | 2.03 (0.20,5.6)  | 1.07 (0.09,12.54)       | 2.35 (0.23,4.37)  | 4.46 (1.03,5.118) | Perphenazine_L AI | 2.48 (0.21,2.92) | 2.10 (0.20,2.03) | 1.54 (0.15,5.91) | 2.05 (0.20,2.88) | 1.85 (0.18,21)   | 2.50 (0.24,25.65) | 2.60 (0.23,9.45) | 2.00 (0.19,0.88) | 2.36 (0.20,7.63) | 1.76 (0.86,6.90) | 2.55 (0.60,6.90) | 2.73 (1.61,1.34)  | 2.00 (0.19,2.134) |
| 0.89 (0.36,2.18)  | 0.81 (0.33,1.98) | 0.82 (0.35,1.91) | 0.43 (0.13,1.47)        | 0.95 (0.37,4.5)   | 1.80 (0.57,7.0)   | 0.40 (0.03,4.76)  | Olanzapine_LAI   | 0.85 (0.40,1.77) | 0.62 (0.27,1.42) | 0.83 (0.36,1.92) | 0.75 (0.31,1.81) | 1.01 (0.50,2.6)   | 1.05 (0.36,3.17) | 0.81 (0.36,1.79) | 0.95 (0.81,1.2)  | 0.71 (0.33,1.53) | 1.03 (0.49,2.19) | 1.10 (0.21,5.76)  | 0.81 (0.30,2.19)  |
| 1.05 (0.63,1.75)  | 0.95 (0.58,1.58) | 0.97 (0.64,1.46) | 0.51 (0.19,1.39)        | 1.12 (0.62,2.0)   | 2.13 (0.88,5.15)  | 0.48 (0.05,5.02)  | 1.18 (0.56,2.48) | Risperidone_LAI  | 0.73 (0.51,1.06) | 0.98 (0.66,1.46) | 0.89 (0.55,1.43) | 1.19 (0.70,2.02)  | 1.24 (0.53,2.8)  | 0.95 (0.71,1.32) | 1.12 (0.55,2.32) | 0.84 (0.70,1.01) | 1.22 (1.07,1.39) | 1.30 (0.30,5.72)  | 0.96 (0.49,1.87)  |
| 1.43 (0.93,2.21)  | 1.30 (0.85,1.99) | 1.32 (0.97,1.80) | 0.69 (0.27,1.79)        | 1.53 (0.90,2.59)  | 2.90 (1.25,6.74)  | 0.65 (0.06,6.74)  | 1.61 (0.71,3.69) | 1.36 (0.95,1.97) | 0.75 (0.57,0.99) | Paliperidone_LAI | 1.33 (0.84,1.9)  | 1.21 (0.47,1.1)   | 1.62 (1.03,2.56) | 1.30 (0.75,3.83) | 1.53 (0.99,1.70) | 1.15 (0.68,3.45) | 1.15 (0.76,1.73) | 1.66 (1.14,2.43)  | 1.30 (0.71,2.41)  |
| 1.07 (0.76,1.51)  | 0.98 (0.70,1.36) | 0.99 (0.85,1.16) | 0.52 (0.21,1.29)        | 1.15 (0.73,1.81)  | 2.18 (0.98,4.84)  | 0.49 (0.05,4.98)  | 1.21 (0.52,2.81) | 1.02 (0.69,1.52) | 0.75 (0.57,0.99) | Paliperidone_LAI | 0.91 (0.69,1.19) | 1.22 (0.84,1.76)  | 1.27 (0.59,2.74) | 0.98 (0.68,1.39) | 1.15 (0.50,2.63) | 0.86 (0.55,1.33) | 1.25 (0.83,1.87) | 1.33 (0.35,5.4)   | 0.98 (0.56,1.70)  |
| 1.18 (0.77,1.83)  | 1.08 (0.70,1.66) | 1.09 (0.80,1.50) | 0.58 (0.22,1.48)        | 1.27 (0.75,2.15)  | 2.40 (1.03,5.59)  | 0.54 (0.05,5.59)  | 1.34 (0.55,3.24) | 1.13 (0.70,1.83) | 0.83 (0.56,1.22) | 1.10 (0.84,1.45) | Paliperidone_LAI | 1.35 (0.85,2.12)  | 1.40 (0.62,3.17) | 1.08 (0.69,1.68) | 1.27 (0.53,3.03) | 0.95 (0.57,1.59) | 1.38 (0.84,2.25) | 1.47 (0.35,6.27)  | 1.08 (0.58,2.00)  |
| 0.88 (0.77,1.01)  | 0.80 (0.55,1.18) | 0.81 (0.58,1.13) | 0.43 (0.17,1.0)         | 0.94 (0.65,1.37)  | 1.79 (0.81,3.96)  | 0.40 (0.04,4.12)  | 0.99 (0.40,2.47) | 0.84 (0.50,1.42) | 0.62 (0.39,0.97) | 0.82 (0.57,1.19) | 0.74 (0.47,1.17) | Phenothiazines_OS | 1.04 (0.52,2.11) | 0.80 (0.49,1.32) | 0.94 (0.39,2.31) | 0.71 (0.40,1.23) | 1.02 (0.75,1.75) | 1.09 (0.25,4.76)  | 0.80 (0.51,1.26)  |
| 0.84 (0.42,1.68)  | 0.77 (0.35,1.67) | 0.78 (0.37,1.66) | 0.41 (0.13,1.3)         | 0.90 (0.42,1.96)  | 1.71 (0.60,4.87)  | 0.38 (0.03,4.35)  | 0.95 (0.31,2.96) | 0.81 (0.34,1.90) | 0.59 (0.26,1.33) | 0.79 (0.36,1.70) | 0.71 (0.31,1.41) | 0.96 (0.47,1.94)  | Haloperidol_OS   | 0.77 (0.33,1.78) | 0.91 (0.29,2.78) | 0.68 (0.28,1.63) | 0.98 (0.41,2.33) | 1.05 (0.21,5.30)  | 0.77 (0.34,1.74)  |
| 1.10 (0.68,1.78)  | 1.00 (0.62,1.61) | 1.01 (0.70,1.48) | 0.53 (0.20,1.4)         | 1.17 (0.67,2.07)  | 2.23 (0.94,5.32)  | 0.50 (0.05,2.3)   | 1.24 (0.56,2.76) | 1.05 (0.78,1.41) | 0.77 (0.59,1.01) | 1.03 (0.72,1.4)  | 0.93 (0.59,1.5)  | 1.25 (0.76,2.06)  | 1.30 (0.56,3.02) | Aripiprazole_OS  | 1.18 (0.54,2.58) | 0.88 (0.62,1.25) | 1.28 (0.93,1.76) | 1.37 (0.32,5.93)  | 1.00 (0.52,1.92)  |
| 0.93 (0.38,2.26)  | 0.85 (0.35,2.05) | 0.86 (0.37,1.98) | 0.45 (0.13,1.53)        | 1.00 (0.39,2.54)  | 1.89 (0.60,4.93)  | 0.42 (0.04,4.97)  | 1.05 (0.43,2.4)  | 0.89 (0.43,1.83) | 0.65 (0.29,1.47) | 0.87 (0.38,1.98) | 0.79 (0.33,1.88) | 1.06 (0.43,2.59)  | 1.10 (0.36,3.39) | 0.85 (0.39,1.85) | Olanzapine_OS    | 0.75 (0.35,1.58) | 1.08 (0.52,2.26) | 1.16 (0.21,5.01)  | 0.85 (0.32,2.28)  |
| 1.25 (0.72,2.15)  | 1.14 (0.66,1.94) | 1.15 (0.73,1.8)  | 0.61 (0.22,1.64)        | 1.33 (0.72,2.48)  | 2.53 (1.02,6.25)  | 0.57 (0.05,6.01)  | 1.41 (0.66,3.02) | 1.19 (0.99,1.43) | 0.87 (0.58,1.31) | 1.16 (0.75,1.8)  | 1.05 (0.63,1.76) | 1.42 (0.81,2.48)  | 1.48 (0.61,3.55) | 1.13 (0.80,1.61) | Risperidone_OS   | 1.34 (0.63,2.82) | 1.45 (1.16,1.8)  | 1.55 (0.35,8.88)  | 1.14 (0.57,2.28)  |
| 0.86 (0.51,1.44)  | 0.78 (0.47,1.30) | 0.79 (0.52,1.21) | 0.42 (0.16,1.2)         | 0.92 (0.51,1.67)  | 1.74 (0.72,4.24)  | 0.39 (0.04,4.12)  | 0.97 (0.46,2.06) | 0.82 (0.72,0.94) | 0.60 (0.41,0.88) | 0.80 (0.53,1.20) | 0.73 (0.45,1.18) | 0.98 (0.57,1.67)  | 1.02 (0.43,2.41) | 0.78 (0.57,1.08) | 0.92 (0.44,1.92) | 0.69 (0.55,0.86) | Quetiapine_OS    | 1.07 (0.24,4.70)  | 0.78 (0.40,1.54)  |

|                     |                     |                     |                     |                     |                     |                     |                     |                     |                     |                     |                     |                     |                     |                     |                     |                     |                     |                     |                     |
|---------------------|---------------------|---------------------|---------------------|---------------------|---------------------|---------------------|---------------------|---------------------|---------------------|---------------------|---------------------|---------------------|---------------------|---------------------|---------------------|---------------------|---------------------|---------------------|---------------------|
| 0.80<br>(0.19,3.48) | 0.73<br>(0.17,3.16) | 0.74<br>(0.18,3.11) | 0.39<br>(0.07,2.11) | 0.86<br>(0.19,3.83) | 1.63<br>(0.32,8.35) | 0.37<br>(0.02,5.58) | 0.91<br>(0.17,4.75) | 0.77<br>(0.17,3.37) | 0.56<br>(0.13,2.40) | 0.75<br>(0.18,3.11) | 0.68<br>(0.16,2.89) | 0.91<br>(0.21,3.98) | 0.95<br>(0.19,4.81) | 0.73<br>(0.17,3.17) | 0.86<br>(0.17,4.48) | 0.65<br>(0.15,2.86) | 0.94<br>(0.21,4.11) | Paliperidone_S      | 0.73<br>(0.16,3.38) |
| 1.10<br>(0.71,1.69) | 1.00<br>(0.57,1.76) | 1.01<br>(0.60,1.72) | 0.53<br>(0.19,1.48) | 1.17<br>(0.67,2.05) | 2.23<br>(0.91,5.46) | 0.50<br>(0.05,5.32) | 1.24<br>(0.46,3.36) | 0.77<br>(0.54,2.05) | 1.05<br>(0.42,1.42) | 1.02<br>(0.59,1.78) | 0.93<br>(0.50,1.71) | 1.25<br>(0.79,1.96) | 1.30<br>(0.58,2.94) | 1.00<br>(0.52,1.91) | 1.18<br>(0.44,3.16) | 0.88<br>(0.44,1.76) | 1.28<br>(0.65,2.51) | 1.36<br>(0.30,6.28) | DBP_OS              |

Net league table: head-to-head comparisons. Relative risks (RRs) and 95% confidence intervals (CIs) are reported. RRs lower than 1 favour the column-defining treatment. Statistically significant results are highlighted in grey. LAI=long-acting antipsychotics

**Evaluation of heterogeneity and incoherence**

Overall heterogeneity

Estimated between-studies SD: 2.730e-09

Overall incoherence

Design-by-treatment test: P = 1.000

Loop-specific approach

\* 8 triangular loops found

\* 2 quadratic loops found

Note: Heterogeneity of loop B-C-D cannot be estimated due to insufficient observations - set equal to 0

Note: Heterogeneity of loop B-C-E cannot be estimated due to insufficient observations - set equal to 0

Note: Heterogeneity of loop C-I-K-R cannot be estimated due to insufficient observations - set equal to 0

Note: Heterogeneity of loop I-J-K-O cannot be estimated due to insufficient observations - set equal to 0

Evaluation of inconsistency using loop-specific heterogeneity estimates:

| Loop    | ROR    | z_value | p_value | CI_95         | Loop_Heterog_tau2 |
|---------|--------|---------|---------|---------------|-------------------|
| A-B-D   | 13.068 | 1.236   | 0.217   | (1.00,770.41) | 0.208             |
| A-C-D   | 6.829  | 1.073   | 0.283   | (1.00,228.34) | 0.061             |
| A-B-E   | 2.103  | 1.300   | 0.194   | (1.00,6.45)   | 0.000             |
| A-B-C   | 1.640  | 0.852   | 0.394   | (1.00,5.12)   | 0.080             |
| A-C-E   | 1.198  | 0.183   | 0.855   | (1.00,8.31)   | 0.000             |
| A-C-F   | 1.184  | 0.200   | 0.841   | (1.00,6.17)   | 0.034             |
| B-C-E   | 1.174  | 0.154   | 0.877   | (1.00,8.99)   | 0.000             |
| B-C-D   | 1.120  | 0.119   | 0.905   | (1.00,7.25)   | 0.000             |
| I-J-K-O | 1.087  | 0.134   | 0.894   | (1.00,3.68)   | 0.000             |
| C-I-K-R | 1.066  | 0.095   | 0.925   | (1.00,4.02)   | 0.000             |

Consistency between direct and indirect estimates

| Side  | Direct Coef. | Std. Err. | Indirect Coef. | Std. Err. | Difference Coef. | Std. Err. | P> z  |
|-------|--------------|-----------|----------------|-----------|------------------|-----------|-------|
| A B   | -.4875822    | .3723547  | .0333554       | .2117139  | -.5209375        | .428335   | 0.224 |
| A C   | -.085252     | .1839335  | -.0680261      | .2894155  | -.0172258        | .3429182  | 0.960 |
| A D   | 1.147402     | 1.602825  | -.8994899      | .4925637  | 2.046892         | 1.676803  | 0.222 |
| A E   | .1441397     | .2007416  | -.2513754      | .4042129  | .3955151         | .451315   | 0.381 |
| A F   | .807327      | .5635974  | .6048932       | .5701071  | .2024338         | .8016634  | 0.801 |
| A M   | .            | .         | .              | .         | .                | .         | .     |
| A N   | .            | .         | .              | .         | .                | .         | .     |
| A T   | .            | .         | .              | .         | .                | .         | .     |
| B C   | 3.63e-12     | .1698416  | .0594387       | .3115724  | -.0594387        | .354857   | 0.867 |
| B D   | -.8473021    | .6399391  | -.4060448      | .6465801  | -.4412573        | .9097146  | 0.628 |
| B E   | -.111591     | .3846946  | .3024192       | .2788693  | -.4140102        | .47514    | 0.384 |
| B G * | -.6931472    | 1.172604  | .0700438       | 196.6186  | -.763191         | 196.6196  | 0.997 |
| C D   | -.7339727    | .68487    | -.5700517      | .610011   | -.163921         | .917146   | 0.858 |
| C E   | .0487902     | .9499373  | .1515867       | .2236712  | -.1027965        | .9759148  | 0.916 |
| C F   | .6931187     | .5477174  | .8954638       | .585407   | -.2023452        | .8016955  | 0.801 |
| C K   | .0099772     | .0815686  | .0139144       | .439879   | -.0039372        | .4473779  | 0.993 |
| C R   | .2336111     | .3615246  | .2298302       | .2638952  | .0037808         | .4475982  | 0.993 |
| H P * | -.0502105    | .0832287  | .1419084       | 60.18083  | -.1921189        | 60.18089  | 0.997 |
| I K   | -.0896127    | .5622021  | -.0127774      | .218202   | -.0768353        | .603062   | 0.899 |
| I O   | -.0413671    | .166131   | -.0804699      | .3767836  | .0391028         | .4117832  | 0.924 |
| I P * | .1177832     | .3689324  | .0316885       | 27.84874  | .0860947         | 27.85126  | 0.998 |
| I Q * | -.1733904    | .0933239  | .1418003       | 30.46621  | -.3151907        | 30.46625  | 0.992 |
| I R   | .1981138     | .0677678  | .2018764       | .4424274  | -.0037626        | .4475875  | 0.993 |
| J K   | .292658      | .1508882  | .2535295       | .3831246  | .0391285         | .4117663  | 0.924 |
| J O   | .2575917     | .1459993  | .2967037       | .3850259  | -.039112         | .4117777  | 0.924 |
| K L * | -.099321     | .138302   | .1372297       | 138.472   | -.2365507        | 138.472   | 0.999 |
| K S * | .2876821     | .7264832  | .1197562       | 192.7436  | .1679259         | 192.7454  | 0.999 |



\* Warning: all the evidence about these contrasts comes from the trials which directly compare them.

**Funnel plot**

Not applicable: no comparisons with 10 or more studies.

## Supplement O - Sensitivity analysis: acceptability (excluding trials with less than 50 participants AND excluding trials published before 1990)

### Treatment codes

|                    |   |
|--------------------|---|
| Placebo            | A |
| Fluphenazine LAI   | B |
| Flupenthixol LAI   | C |
| Haloperidol LAI    | D |
| Zuclopenthixol LAI | E |
| Pipothiazine LAI   | F |
| Olanzapine LAI     | G |
| Risperidone LAI    | H |
| Aripiprazole LAI   | I |
| Paliperidone LAI-1 | J |
| Paliperidone LAI-3 | K |
| Haloperidol OS     | L |
| Aripiprazole OS    | M |
| Olanzapine OS      | N |
| Risperidone OS     | O |
| Quetiapine OS      | P |
| Paliperidone OS    | Q |

### Network map

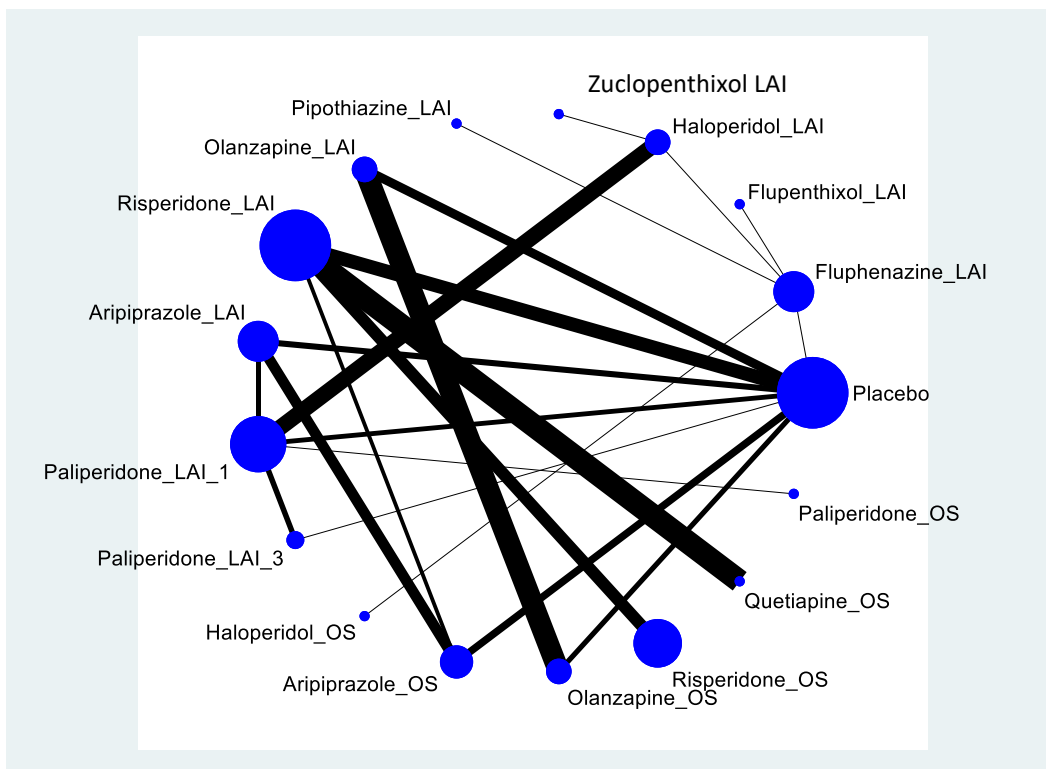

### Pairwise meta-analysis

|   | Study | ES    | [95% Conf. Interval] |       |
|---|-------|-------|----------------------|-------|
|   | O - H |       |                      |       |
| 1 |       | 0.789 | 0.563                | 1.105 |
| 2 |       | 0.091 | 0.005                | 1.562 |
| 3 |       | 1.231 | 0.677                | 2.237 |

|       |               |       |       |        |
|-------|---------------|-------|-------|--------|
| 4     |               | 1.147 | 0.606 | 2.173  |
| 5     |               | 0.754 | 0.569 | 0.999  |
| 58    |               | 0.954 | 0.540 | 1.687  |
|       | Sub-total     |       |       |        |
|       | D+L pooled ES | 0.854 | 0.694 | 1.051  |
| ----- |               |       |       |        |
| I - A |               |       |       |        |
| 6     |               | 0.487 | 0.376 | 0.631  |
|       | Sub-total     |       |       |        |
|       | D+L pooled ES | 0.487 | 0.376 | 0.631  |
| ----- |               |       |       |        |
| M - A |               |       |       |        |
| 6     |               | 0.619 | 0.490 | 0.782  |
|       | Sub-total     |       |       |        |
|       | D+L pooled ES | 0.619 | 0.490 | 0.782  |
| ----- |               |       |       |        |
| M - I |               |       |       |        |
| 6     |               | 1.271 | 0.974 | 1.657  |
| 7     |               | 1.294 | 0.972 | 1.722  |
|       | Sub-total     |       |       |        |
|       | D+L pooled ES | 1.281 | 1.055 | 1.556  |
| ----- |               |       |       |        |
| G - A |               |       |       |        |
| 8     |               | 0.636 | 0.515 | 0.786  |
|       | Sub-total     |       |       |        |
|       | D+L pooled ES | 0.636 | 0.515 | 0.786  |
| ----- |               |       |       |        |
| N - A |               |       |       |        |
| 8     |               | 0.421 | 0.318 | 0.556  |
|       | Sub-total     |       |       |        |
|       | D+L pooled ES | 0.421 | 0.318 | 0.556  |
| ----- |               |       |       |        |
| N - G |               |       |       |        |
| 8     |               | 0.661 | 0.515 | 0.850  |
| 9     |               | 0.951 | 0.808 | 1.120  |
|       | Sub-total     |       |       |        |
|       | D+L pooled ES | 0.804 | 0.563 | 1.146  |
| ----- |               |       |       |        |
| L - B |               |       |       |        |
| 15    |               | 1.184 | 0.594 | 2.361  |
|       | Sub-total     |       |       |        |
|       | D+L pooled ES | 1.184 | 0.594 | 2.361  |
| ----- |               |       |       |        |
| P - H |               |       |       |        |
| 17    |               | 1.219 | 1.067 | 1.392  |
|       | Sub-total     |       |       |        |
|       | D+L pooled ES | 1.219 | 1.067 | 1.392  |
| ----- |               |       |       |        |
| M - H |               |       |       |        |
| 18    |               | 0.959 | 0.693 | 1.329  |
|       | Sub-total     |       |       |        |
|       | D+L pooled ES | 0.959 | 0.693 | 1.329  |
| ----- |               |       |       |        |
| J - I |               |       |       |        |
| 23    |               | 1.342 | 0.998 | 1.806  |
| 24    |               | 0.981 | 0.020 | 48.494 |
|       | Sub-total     |       |       |        |
|       | D+L pooled ES | 1.340 | 0.997 | 1.801  |
| ----- |               |       |       |        |
| J - A |               |       |       |        |
| 28    |               | 1.061 | 0.658 | 1.710  |
| 54    |               | 0.842 | 0.585 | 1.212  |
|       | Sub-total     |       |       |        |
|       | D+L pooled ES | 0.917 | 0.686 | 1.225  |
| ----- |               |       |       |        |
| H - A |               |       |       |        |
| 29    |               | 0.740 | 0.623 | 0.878  |
|       | Sub-total     |       |       |        |
|       | D+L pooled ES | 0.740 | 0.623 | 0.878  |
| ----- |               |       |       |        |
| Q - J |               |       |       |        |
| 32    |               | 1.333 | 0.321 | 5.538  |
|       | Sub-total     |       |       |        |
|       | D+L pooled ES | 1.333 | 0.321 | 5.538  |
| ----- |               |       |       |        |
| F - B |               |       |       |        |
| 33    |               | 2.007 | 0.747 | 5.391  |
|       | Sub-total     |       |       |        |

|               |  |       |       |       |
|---------------|--|-------|-------|-------|
| D+L pooled ES |  | 2.007 | 0.747 | 5.391 |
| -----         |  |       |       |       |
| K - A         |  |       |       |       |
| 34            |  | 0.473 | 0.244 | 0.916 |
| Sub-total     |  |       |       |       |
| D+L pooled ES |  | 0.473 | 0.244 | 0.916 |
| -----         |  |       |       |       |
| B - A         |  |       |       |       |
| 38            |  | 0.600 | 0.319 | 1.128 |
| Sub-total     |  |       |       |       |
| D+L pooled ES |  | 0.600 | 0.319 | 1.128 |
| -----         |  |       |       |       |
| J - D         |  |       |       |       |
| 49            |  | 1.010 | 0.861 | 1.185 |
| Sub-total     |  |       |       |       |
| D+L pooled ES |  | 1.010 | 0.861 | 1.185 |
| -----         |  |       |       |       |
| K - J         |  |       |       |       |
| 59            |  | 0.905 | 0.690 | 1.187 |
| Sub-total     |  |       |       |       |
| D+L pooled ES |  | 0.905 | 0.690 | 1.187 |
| -----         |  |       |       |       |
| C - B         |  |       |       |       |
| 62            |  | 0.714 | 0.292 | 1.749 |
| Sub-total     |  |       |       |       |
| D+L pooled ES |  | 0.714 | 0.292 | 1.749 |
| -----         |  |       |       |       |
| E - D         |  |       |       |       |
| 63            |  | 0.480 | 0.125 | 1.837 |
| Sub-total     |  |       |       |       |
| D+L pooled ES |  | 0.480 | 0.125 | 1.837 |
| -----         |  |       |       |       |
| D - B         |  |       |       |       |
| 74            |  | 1.611 | 0.672 | 3.861 |
| Sub-total     |  |       |       |       |
| D+L pooled ES |  | 1.611 | 0.672 | 3.861 |
| -----         |  |       |       |       |

Test(s) of heterogeneity:

|       | Heterogeneity<br>statistic | degrees of<br>freedom | P     | I-squared** | Tau-squared |
|-------|----------------------------|-----------------------|-------|-------------|-------------|
| O - H | 5.73                       | 5                     | 0.333 | 12.7%       | 0.0090      |
| I - A | 0.00                       | 0                     | .     | .%          | 0.0000      |
| M - A | 0.00                       | 0                     | .     | .%          | 0.0000      |
| M - I | 0.01                       | 1                     | 0.927 | 0.0%        | 0.0000      |
| G - A | 0.00                       | 0                     | .     | .%          | 0.0000      |
| N - A | 0.00                       | 0                     | .     | .%          | 0.0000      |
| N - G | 5.65                       | 1                     | 0.017 | 82.3%       | 0.0543      |
| L - B | 0.00                       | 0                     | .     | .%          | 0.0000      |
| P - H | 0.00                       | 0                     | .     | .%          | 0.0000      |
| M - H | 0.00                       | 0                     | .     | .%          | 0.0000      |
| J - I | 0.02                       | 1                     | 0.875 | 0.0%        | 0.0000      |
| J - A | 0.57                       | 1                     | 0.451 | 0.0%        | 0.0000      |
| H - A | 0.00                       | 0                     | .     | .%          | 0.0000      |
| Q - J | 0.00                       | 0                     | .     | .%          | 0.0000      |
| F - B | 0.00                       | 0                     | .     | .%          | 0.0000      |
| K - A | 0.00                       | 0                     | .     | .%          | 0.0000      |
| B - A | 0.00                       | 0                     | .     | .%          | 0.0000      |
| J - D | 0.00                       | 0                     | .     | .%          | 0.0000      |
| K - J | 0.00                       | 0                     | .     | .%          | 0.0000      |
| C - B | 0.00                       | 0                     | .     | .%          | 0.0000      |
| E - D | 0.00                       | 0                     | .     | .%          | 0.0000      |
| D - B | 0.00                       | 0                     | .     | .%          | 0.0000      |

\*\* I-squared: the variation in ES attributable to heterogeneity)

### Net league table

|                     |                     |                     |                     |                      |                     |                     |                     |                     |                     |                      |                     |                     |                     |                     |                     |                      |
|---------------------|---------------------|---------------------|---------------------|----------------------|---------------------|---------------------|---------------------|---------------------|---------------------|----------------------|---------------------|---------------------|---------------------|---------------------|---------------------|----------------------|
| Fluphenazine_LAI    | 0.71<br>(0.29,1.78) | 1.42<br>(0.80,2.52) | 0.68<br>(0.16,2.97) | 2.01<br>(0.73,5.49)  | 1.06<br>(0.57,1.94) | 1.30<br>(0.72,2.33) | 0.95<br>(0.53,1.70) | 1.42<br>(0.81,2.49) | 1.19<br>(0.63,2.22) | 1.79<br>(1.04,3.08)  | 1.18<br>(0.58,2.42) | 1.19<br>(0.67,2.14) | 0.87<br>(0.47,1.63) | 1.11<br>(0.59,2.06) | 1.58<br>(0.84,2.97) | 1.89<br>(0.40,8.85)  |
| 1.40<br>(0.56,3.50) | Flupenthixol_LAI    | 1.99<br>(0.67,5.85) | 0.95<br>(0.17,5.40) | 2.81<br>(0.72,10.95) | 1.48<br>(0.49,4.44) | 1.81<br>(0.61,5.38) | 1.33<br>(0.45,3.93) | 1.99<br>(0.68,5.81) | 1.66<br>(0.52,5.30) | 2.50<br>(0.86,7.25)  | 1.66<br>(0.52,5.30) | 1.67<br>(0.40,3.75) | 1.22<br>(0.39,0.9)  | 1.55<br>(0.51,4.69) | 2.21<br>(0.73,6.73) | 2.65<br>(0.44,15.92) |
| 0.70<br>(0.40,1.25) | 0.50<br>(0.17,1.48) | Haloperidol_LAI     | 0.48<br>(0.12,1.86) | 1.41<br>(0.44,4.51)  | 0.74<br>(0.48,1.15) | 0.91<br>(0.61,1.36) | 0.67<br>(0.47,0.96) | 1.00<br>(0.78,1.28) | 0.84<br>(0.57,1.24) | 1.26<br>(0.90,1.76)  | 0.83<br>(0.33,2.09) | 0.84<br>(0.58,1.23) | 0.61<br>(0.39,0.9)  | 0.78<br>(0.50,1.22) | 1.11<br>(0.70,1.76) | 1.33<br>(0.31,5.73)  |
| 1.47<br>(0.34,6.40) | 1.05<br>(0.19,5.94) | 2.08<br>(0.54,8.08) | Zuclopenthixol_LAI  | 2.95<br>(0.50,17.54) | 1.55<br>(0.37,6.44) | 1.90<br>(0.46,7.82) | 1.40<br>(0.34,5.67) | 2.08<br>(0.53,8.26) | 1.74<br>(0.42,7.15) | 2.62<br>(0.65,10.60) | 1.74<br>(0.34,8.94) | 1.75<br>(0.43,7.16) | 1.28<br>(0.31,5.36) | 1.63<br>(0.39,6.78) | 2.32<br>(0.55,9.71) | 2.78<br>(0.38,20.33) |
| 0.50<br>(0.18,1.36) | 0.36<br>(0.09,1.39) | 0.71<br>(0.22,2.25) | 0.34<br>(0.06,2.02) | Pipothiazine_LAI     | 0.53<br>(0.16,1.70) | 0.65<br>(0.20,2.07) | 0.47<br>(0.15,1.51) | 0.71<br>(0.22,2.24) | 0.59<br>(0.18,1.94) | 0.89<br>(0.28,2.79)  | 0.59<br>(0.17,2.03) | 0.59<br>(0.19,1.90) | 0.43<br>(0.13,1.42) | 0.55<br>(0.17,1.80) | 0.79<br>(0.24,2.58) | 0.94<br>(0.15,5.95)  |

|                     |                     |                     |                     |                     |                     |                     |                     |                     |                     |                     |                     |                     |                     |                     |                     |                     |
|---------------------|---------------------|---------------------|---------------------|---------------------|---------------------|---------------------|---------------------|---------------------|---------------------|---------------------|---------------------|---------------------|---------------------|---------------------|---------------------|---------------------|
| 0.95<br>(0.52,1.74) | 0.68<br>(0.23,2.03) | 1.34<br>(0.87,2.08) | 0.65<br>(0.16,2.68) | 1.90<br>(0.59,6.17) | Olanzapine_LAI      | 1.23<br>(0.86,1.75) | 0.90<br>(0.63,1.30) | 1.34<br>(0.93,1.94) | 1.12<br>(0.72,1.76) | 1.69<br>(1.29,2.23) | 1.12<br>(0.44,2.87) | 1.13<br>(0.79,1.62) | 0.83<br>(0.67,1.01) | 1.05<br>(0.69,1.59) | 1.50<br>(0.98,2.29) | 1.79<br>(0.41,7.90) |
| 0.77<br>(0.43,1.39) | 0.55<br>(0.19,1.63) | 1.09<br>(0.74,1.63) | 0.53<br>(0.13,2.16) | 1.55<br>(0.48,4.96) | 0.81<br>(0.57,1.16) | Risperidone_LAI     | 0.73<br>(0.55,0.99) | 1.09<br>(0.80,1.51) | 0.92<br>(0.60,1.39) | 1.38<br>(1.10,1.72) | 0.91<br>(0.36,2.30) | 0.92<br>(0.71,1.20) | 0.67<br>(0.46,0.98) | 0.85<br>(0.69,1.06) | 1.22<br>(0.97,1.54) | 1.46<br>(0.34,6.36) |
| 1.05<br>(0.59,1.88) | 0.75<br>(0.25,2.22) | 1.49<br>(1.05,2.13) | 0.72<br>(0.18,2.91) | 2.11<br>(0.66,6.75) | 1.11<br>(0.77,1.60) | 1.36<br>(1.01,1.83) | Aripiprazole_LAI    | 1.49<br>(1.15,1.94) | 1.25<br>(0.85,1.84) | 1.88<br>(1.48,2.38) | 1.25<br>(0.50,3.13) | 1.26<br>(1.01,1.57) | 0.92<br>(0.62,1.35) | 1.17<br>(0.81,1.67) | 1.66<br>(1.14,2.42) | 1.99<br>(0.46,8.57) |
| 0.70<br>(0.40,1.24) | 0.50<br>(0.17,1.47) | 1.00<br>(0.78,1.28) | 0.48<br>(0.12,1.90) | 1.41<br>(0.45,4.48) | 0.74<br>(0.52,1.07) | 0.91<br>(0.66,1.26) | 0.67<br>(0.51,0.87) | Paliperidone_LAI_1  | 0.84<br>(0.62,1.14) | 1.26<br>(0.99,1.60) | 0.83<br>(0.34,2.07) | 0.84<br>(0.63,1.13) | 0.61<br>(0.41,0.91) | 0.78<br>(0.53,1.14) | 1.11<br>(0.75,1.64) | 1.33<br>(0.32,5.61) |
| 0.84<br>(0.45,1.58) | 0.60<br>(0.20,1.83) | 1.20<br>(0.81,1.77) | 0.57<br>(0.14,2.35) | 1.69<br>(0.52,5.53) | 0.89<br>(0.57,1.39) | 1.09<br>(0.72,1.65) | 0.80<br>(0.54,1.18) | 1.20<br>(0.88,1.62) | Paliperidone_LAI_3  | 1.50<br>(1.05,2.15) | 1.00<br>(0.39,2.58) | 1.01<br>(0.67,1.57) | 0.73<br>(0.46,1.17) | 0.93<br>(0.58,1.49) | 1.33<br>(0.83,2.14) | 1.59<br>(0.37,6.93) |
| 0.56<br>(0.33,0.96) | 0.40<br>(0.14,1.16) | 0.79<br>(0.57,1.11) | 0.38<br>(0.09,1.54) | 1.12<br>(0.36,3.53) | 0.59<br>(0.45,0.78) | 0.73<br>(0.58,0.91) | 0.53<br>(0.42,0.67) | 0.79<br>(0.62,1.01) | 0.66<br>(0.46,0.95) | Placebo             | 0.66<br>(0.27,1.63) | 0.67<br>(0.53,0.84) | 0.49<br>(0.36,0.66) | 0.62<br>(0.46,0.84) | 0.88<br>(0.64,1.22) | 1.06<br>(0.25,4.55) |
| 0.84<br>(0.41,1.73) | 0.60<br>(0.19,1.93) | 1.20<br>(0.48,3.00) | 0.58<br>(0.11,2.96) | 1.69<br>(0.49,5.83) | 0.89<br>(0.35,2.28) | 1.09<br>(0.43,2.76) | 0.80<br>(0.32,2.02) | 1.20<br>(0.48,2.98) | 1.00<br>(0.39,2.60) | 1.51<br>(0.61,3.71) | Haloperidol_OS      | 1.01<br>(0.40,2.54) | 0.74<br>(0.28,1.90) | 0.94<br>(0.36,2.42) | 1.33<br>(0.51,3.47) | 1.60<br>(0.29,8.75) |
| 0.84<br>(0.47,1.50) | 0.60<br>(0.20,1.77) | 1.19<br>(0.81,1.73) | 0.57<br>(0.14,2.33) | 1.68<br>(0.53,5.38) | 0.88<br>(0.62,1.27) | 1.09<br>(0.83,1.42) | 0.80<br>(0.64,0.99) | 1.19<br>(0.88,1.60) | 0.99<br>(0.66,1.49) | 1.50<br>(1.19,1.88) | 0.99<br>(0.39,2.50) | Aripiprazole_OS     | 0.73<br>(0.50,1.07) | 0.93<br>(0.66,1.30) | 1.32<br>(0.93,1.88) | 1.58<br>(0.37,6.87) |
| 1.15<br>(0.61,2.14) | 0.82<br>(0.27,2.48) | 1.63<br>(1.03,2.58) | 0.78<br>(0.19,3.27) | 2.30<br>(0.70,7.52) | 1.21<br>(0.99,1.44) | 1.49<br>(1.02,2.17) | 1.09<br>(0.74,1.61) | 1.63<br>(1.10,2.41) | 1.36<br>(0.85,2.17) | 2.05<br>(1.51,2.78) | 1.36<br>(0.53,3.51) | 1.37<br>(0.93,2.01) | Olanzapine_OS       | 1.27<br>(0.82,1.97) | 1.81<br>(1.16,2.82) | 2.17<br>(0.49,9.62) |
| 0.90<br>(0.48,1.68) | 0.64<br>(0.21,1.95) | 1.28<br>(0.82,2.00) | 0.61<br>(0.15,2.56) | 1.81<br>(0.55,5.92) | 0.95<br>(0.63,1.44) | 1.17<br>(0.95,1.45) | 0.86<br>(0.60,1.23) | 1.28<br>(0.88,1.87) | 1.07<br>(0.67,1.71) | 1.61<br>(1.18,2.19) | 1.07<br>(0.41,2.76) | 1.08<br>(0.77,1.57) | 0.79<br>(0.51,1.22) | Risperidone_OS      | 1.43<br>(1.04,1.95) | 1.71<br>(0.39,7.55) |
| 0.63<br>(0.34,1.19) | 0.45<br>(0.15,1.37) | 0.90<br>(0.57,1.44) | 0.43<br>(0.10,1.80) | 1.27<br>(0.39,4.17) | 0.67<br>(0.44,1.02) | 0.82<br>(0.65,1.04) | 0.60<br>(0.41,0.88) | 0.90<br>(0.60,1.33) | 0.75<br>(0.47,1.21) | 1.13<br>(0.82,1.56) | 0.75<br>(0.29,1.95) | 0.76<br>(0.53,1.07) | 0.55<br>(0.35,0.86) | 0.70<br>(0.51,0.96) | Quetiapine_OS       | 1.20<br>(0.27,5.31) |
| 0.53<br>(0.11,2.47) | 0.38<br>(0.06,2.27) | 0.75<br>(0.17,3.22) | 0.36<br>(0.05,2.63) | 1.06<br>(0.17,6.69) | 0.56<br>(0.13,2.46) | 0.69<br>(0.16,2.98) | 0.50<br>(0.12,2.17) | 0.75<br>(0.18,3.15) | 0.63<br>(0.14,2.73) | 0.94<br>(0.22,4.05) | 0.63<br>(0.11,3.43) | 0.63<br>(0.15,2.74) | 0.46<br>(0.10,2.04) | 0.59<br>(0.13,2.59) | 0.84<br>(0.19,3.71) | Paliperidone_OS     |

Net league table: head-to-head comparisons. Relative risks (RRs) and 95% confidence intervals (CIs) are reported. RRs lower than 1 favour the column-defining treatment. Statistically significant results are highlighted in grey. LAI=long-acting antipsychotics

**Evaluation of heterogeneity and incoherence**

Overall heterogeneity

Estimated between-studies SD: .09755338

Overall incoherence

Design-by-treatment test: P = 0.164

Loop-specific approach

- \* 5 triangular loops found
- \* 1 quadratic loops found

Note: Heterogeneity of loop A-G-N cannot be estimated due to insufficient observations - set equal to 0  
 Note: Heterogeneity of loop A-H-M cannot be estimated due to insufficient observations - set equal to 0  
 Note: Heterogeneity of loop A-I-M cannot be estimated due to insufficient observations - set equal to 0  
 Note: Heterogeneity of loop A-J-K cannot be estimated due to insufficient observations - set equal to 0  
 Note: Heterogeneity of loop A-B-D-J cannot be estimated due to insufficient observations - set equal to 0

Evaluation of inconsistency using loop-specific heterogeneity estimates:

| Loop    | ROR   | z_value | p_value | CI_95        | Loop_Heterog_tau2 |
|---------|-------|---------|---------|--------------|-------------------|
| A-J-K   | 1.756 | 1.432   | 0.152   | (1.00, 3.79) | 0.000             |
| A-G-N   | 1.438 | 1.842   | 0.065   | (1.00, 2.12) | 0.000             |
| A-I-J   | 1.404 | 1.364   | 0.173   | (1.00, 2.29) | 0.000             |
| A-H-M   | 1.146 | 0.614   | 0.539   | (1.00, 1.77) | 0.000             |
| A-B-D-J | 1.065 | 0.109   | 0.913   | (1.00, 3.29) | 0.000             |
| A-I-M   | 1.018 | 0.079   | 0.937   | (1.00, 1.60) | 0.000             |

Consistency between direct and indirect estimates

| Side  | Direct Coef. | Std. Err. | Indirect Coef. | Std. Err. | Difference Coef. | Std. Err. | P> z  |
|-------|--------------|-----------|----------------|-----------|------------------|-----------|-------|
| A B   | -.5108256    | .3375692  | -.7259933      | .4921212  | .2151676         | .5967715  | 0.718 |
| A G * | -.451994     | .1079237  | -1.178196      | .2990412  | .7262015         | .3054885  | 0.017 |
| A H   | -.3015421    | .1440834  | -.3790467      | .2484732  | .0775046         | .2872263  | 0.787 |
| A I   | -.7233923    | .1672036  | -.5178905      | .1829315  | -.2055018        | .248723   | 0.409 |
| A J   | -.0822706    | .161659   | -.4223888      | .1830257  | .3401182         | .2442025  | 0.164 |
| A K   | -.7490276    | .3514245  | -.2824009      | .2150836  | -.4666267        | .4120196  | 0.257 |
| A M   | -.480684     | .1600958  | -.2951613      | .1861062  | -.1855227        | .2456801  | 0.450 |
| A N * | -.8653635    | .1424108  | -.1390493      | .2520513  | -.7263142        | .3054931  | 0.017 |
| B C * | -.3364722    | .4671677  | 1.120176       | 107.0903  | -1.456648        | 107.0908  | 0.989 |
| B D   | .4769283     | .4572739  | .2615936       | .3834958  | .2153347         | .5967977  | 0.718 |

|       |           |          |           |          |           |          |       |
|-------|-----------|----------|-----------|----------|-----------|----------|-------|
| B F * | .6966498  | .5134686 | 1.01033   | 152.4959 | -.3136806 | 152.4974 | 0.998 |
| B L * | .1690245  | .3653612 | 1.149392  | 178.6192 | -.9803679 | 178.6196 | 0.996 |
| D E * | -.7339692 | .6917826 | .4081635  | 165.8467 | -1.142133 | 165.8473 | 0.995 |
| D J   | .0099772  | .1300101 | -.2054431 | .5823947 | .2154203  | .5967296 | 0.718 |
| G N   | .         | .        | .         | .        | .         | .        | .     |
| H M   | -.0413672 | .2017857 | -.1190665 | .2044484 | .0776993  | .2872571 | 0.787 |
| H O * | -.15714   | .1080972 | .6805921  | 30.45666 | -.8377321 | 30.45675 | 0.978 |
| H P * | .1981138  | .1187778 | .6310925  | 56.47521 | -.4329787 | 56.47536 | 0.994 |
| I J   | .2918857  | .1805563 | .5399288  | .2045229 | -.2480431 | .2728124 | 0.363 |
| I M   | .2448241  | .1274155 | .101031   | .3449237 | .143793   | .3678725 | 0.696 |
| J K   | -.099321  | .1701809 | -.5659411 | .3752307 | .4666201  | .4120189 | 0.257 |
| J Q * | .2876821  | .7330029 | .4394514  | 192.7325 | -.1517693 | 192.7344 | 0.999 |

\* Warning: all the evidence about these contrasts comes from the trials which directly compare them.

#### Funnel plot

Not applicable: no comparisons with 10 or more studies.

## Supplement P - Sensitivity analysis: acceptability (excluding trials with high risk of bias - three or more RoB items at "high risk")

### Treatment codes

|                      |   |
|----------------------|---|
| Placebo              | A |
| Fluphenazine LAI     | B |
| Flupenthixol LAI     | C |
| Haloperidol LAI      | D |
| (Zu)clopenthixol LAI | E |
| Pipothiazine LAI     | F |
| Bromperidol LAI      | G |
| Aripiprazole LAI     | H |
| Olanzapine LAI       | I |
| Risperidone LAI      | J |
| Aripiprazole LAI     | K |
| Paliperidone LAI-1   | L |
| Paliperidone LAI-3   | M |
| Phenotiazines OS     | N |
| Haloperidol OS       | O |
| Aripiprazole OS      | P |
| Olanzapine OS        | Q |
| Risperidone OS       | R |
| Paliperidone OS      | S |
| DBP_OS               | T |

### Network map

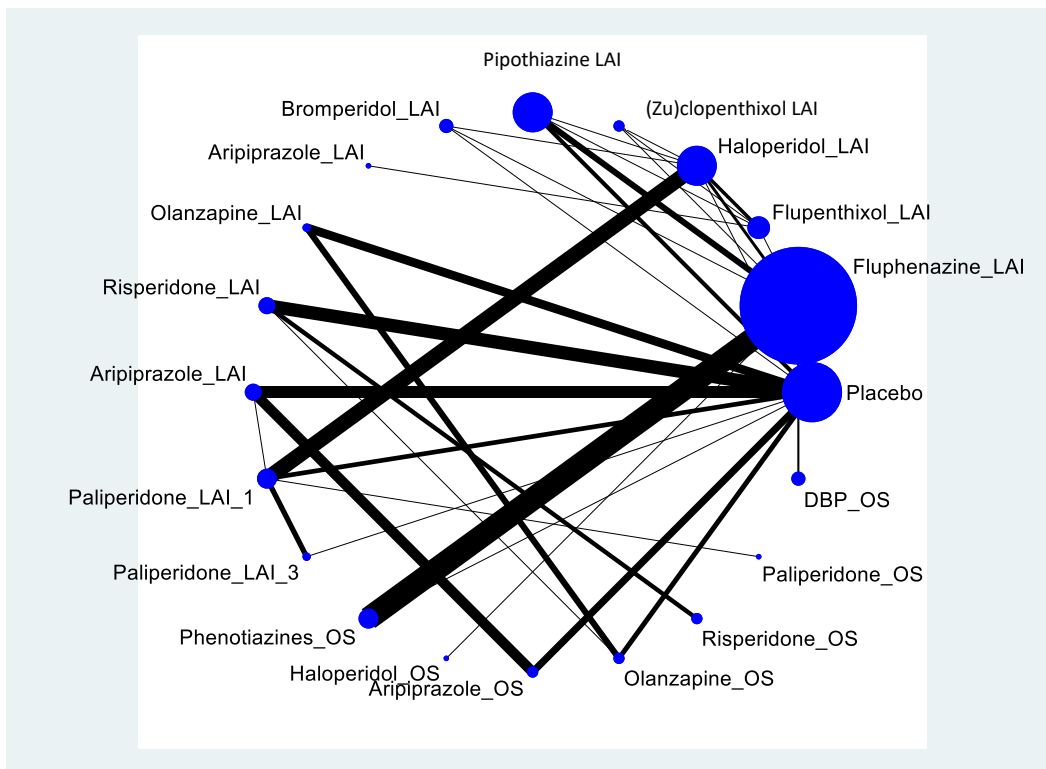

### Pairwise meta-analysis

| Study | ES | [95% Conf. Interval] |
|-------|----|----------------------|
| R - J |    |                      |

|               |  |       |       |        |
|---------------|--|-------|-------|--------|
| 1             |  | 0.789 | 0.563 | 1.105  |
| 2             |  | 0.091 | 0.005 | 1.562  |
| 4             |  | 1.147 | 0.606 | 2.173  |
| Sub-total     |  |       |       |        |
| D+L pooled ES |  | 0.843 | 0.498 | 1.426  |
| -----         |  |       |       |        |
| K - A         |  |       |       |        |
| 6             |  | 0.487 | 0.376 | 0.631  |
| 39            |  | 0.457 | 0.353 | 0.592  |
| Sub-total     |  |       |       |        |
| D+L pooled ES |  | 0.472 | 0.393 | 0.567  |
| -----         |  |       |       |        |
| P - A         |  |       |       |        |
| 6             |  | 0.619 | 0.490 | 0.782  |
| Sub-total     |  |       |       |        |
| D+L pooled ES |  | 0.619 | 0.490 | 0.782  |
| -----         |  |       |       |        |
| P - K         |  |       |       |        |
| 6             |  | 1.271 | 0.974 | 1.657  |
| 7             |  | 1.294 | 0.972 | 1.722  |
| Sub-total     |  |       |       |        |
| D+L pooled ES |  | 1.281 | 1.055 | 1.556  |
| -----         |  |       |       |        |
| I - A         |  |       |       |        |
| 8             |  | 0.636 | 0.515 | 0.786  |
| Sub-total     |  |       |       |        |
| D+L pooled ES |  | 0.636 | 0.515 | 0.786  |
| -----         |  |       |       |        |
| Q - A         |  |       |       |        |
| 8             |  | 0.421 | 0.318 | 0.556  |
| Sub-total     |  |       |       |        |
| D+L pooled ES |  | 0.421 | 0.318 | 0.556  |
| -----         |  |       |       |        |
| Q - I         |  |       |       |        |
| 8             |  | 0.661 | 0.515 | 0.850  |
| Sub-total     |  |       |       |        |
| D+L pooled ES |  | 0.661 | 0.515 | 0.850  |
| -----         |  |       |       |        |
| N - B         |  |       |       |        |
| 11            |  | 0.932 | 0.464 | 1.870  |
| 12            |  | 0.442 | 0.212 | 0.922  |
| 13            |  | 1.272 | 0.963 | 1.679  |
| 14            |  | 1.097 | 0.939 | 1.281  |
| 19            |  | 2.471 | 0.588 | 10.381 |
| Sub-total     |  |       |       |        |
| D+L pooled ES |  | 1.050 | 0.794 | 1.388  |
| -----         |  |       |       |        |
| B - A         |  |       |       |        |
| 12            |  | 0.654 | 0.441 | 0.972  |
| 35            |  | 0.333 | 0.041 | 2.686  |
| 37            |  | 1.367 | 0.326 | 5.723  |
| 38            |  | 0.600 | 0.319 | 1.128  |
| 45            |  | 0.444 | 0.187 | 1.055  |
| 67            |  | 3.000 | 0.140 | 64.262 |
| 76            |  | 0.808 | 0.594 | 1.098  |
| Sub-total     |  |       |       |        |
| D+L pooled ES |  | 0.713 | 0.575 | 0.884  |
| -----         |  |       |       |        |
| N - A         |  |       |       |        |
| 12            |  | 0.289 | 0.149 | 0.562  |
| Sub-total     |  |       |       |        |
| D+L pooled ES |  | 0.289 | 0.149 | 0.562  |
| -----         |  |       |       |        |
| O - B         |  |       |       |        |
| 15            |  | 1.184 | 0.594 | 2.361  |
| Sub-total     |  |       |       |        |
| D+L pooled ES |  | 1.184 | 0.594 | 2.361  |
| -----         |  |       |       |        |
| F - C         |  |       |       |        |
| 20            |  | 0.894 | 0.421 | 1.901  |
| Sub-total     |  |       |       |        |
| D+L pooled ES |  | 0.894 | 0.421 | 1.901  |
| -----         |  |       |       |        |
| C - B         |  |       |       |        |
| 21            |  | 0.750 | 0.183 | 3.068  |
| 62            |  | 0.714 | 0.292 | 1.749  |
| 66            |  | 0.063 | 0.004 | 1.039  |
| Sub-total     |  |       |       |        |



|               |       |       |        |
|---------------|-------|-------|--------|
| D+L pooled ES | 0.562 | 0.217 | 1.461  |
| -----         |       |       |        |
| L - K         |       |       |        |
| 24            | 0.981 | 0.020 | 48.494 |
| Sub-total     |       |       |        |
| D+L pooled ES | 0.981 | 0.020 | 48.494 |
| -----         |       |       |        |
| D - B         |       |       |        |
| 25            | 1.143 | 0.519 | 2.519  |
| 46            | 1.034 | 0.285 | 3.752  |
| 47            | 4.545 | 0.247 | 83.699 |
| 55            | 0.529 | 0.284 | 0.984  |
| 60            | 0.635 | 0.210 | 1.921  |
| 72            | 1.667 | 0.483 | 5.757  |
| 74            | 1.611 | 0.672 | 3.861  |
| Sub-total     |       |       |        |
| D+L pooled ES | 0.961 | 0.631 | 1.463  |
| -----         |       |       |        |
| D - C         |       |       |        |
| 26            | 1.000 | 0.717 | 1.395  |
| Sub-total     |       |       |        |
| D+L pooled ES | 1.000 | 0.717 | 1.395  |
| -----         |       |       |        |
| G - B         |       |       |        |
| 27            | 3.130 | 0.702 | 13.954 |
| 56            | 1.500 | 0.291 | 7.731  |
| Sub-total     |       |       |        |
| D+L pooled ES | 2.242 | 0.743 | 6.766  |
| -----         |       |       |        |
| L - A         |       |       |        |
| 28            | 1.061 | 0.658 | 1.710  |
| 54            | 0.842 | 0.585 | 1.212  |
| Sub-total     |       |       |        |
| D+L pooled ES | 0.917 | 0.686 | 1.225  |
| -----         |       |       |        |
| J - A         |       |       |        |
| 29            | 0.740 | 0.623 | 0.878  |
| Sub-total     |       |       |        |
| D+L pooled ES | 0.740 | 0.623 | 0.878  |
| -----         |       |       |        |
| G - A         |       |       |        |
| 30            | 0.400 | 0.100 | 1.599  |
| Sub-total     |       |       |        |
| D+L pooled ES | 0.400 | 0.100 | 1.599  |
| -----         |       |       |        |
| D - A         |       |       |        |
| 31            | 0.040 | 0.003 | 0.623  |
| Sub-total     |       |       |        |
| D+L pooled ES | 0.040 | 0.003 | 0.623  |
| -----         |       |       |        |
| S - L         |       |       |        |
| 32            | 1.333 | 0.321 | 5.538  |
| Sub-total     |       |       |        |
| D+L pooled ES | 1.333 | 0.321 | 5.538  |
| -----         |       |       |        |
| F - B         |       |       |        |
| 33            | 2.007 | 0.747 | 5.391  |
| 51            | 3.000 | 0.127 | 70.829 |
| 53            | 1.001 | 0.532 | 1.885  |
| 64            | 0.547 | 0.149 | 2.007  |
| 68            | 3.000 | 0.348 | 25.870 |
| 70            | 0.968 | 0.446 | 2.102  |
| 71            | 0.522 | 0.011 | 24.698 |
| 73            | 4.000 | 0.504 | 31.736 |
| 75            | 1.000 | 0.021 | 47.380 |
| 76            | 1.000 | 0.718 | 1.393  |
| Sub-total     |       |       |        |
| D+L pooled ES | 1.062 | 0.824 | 1.368  |
| -----         |       |       |        |
| M - A         |       |       |        |
| 34            | 0.473 | 0.244 | 0.916  |
| Sub-total     |       |       |        |
| D+L pooled ES | 0.473 | 0.244 | 0.916  |
| -----         |       |       |        |
| T - B         |       |       |        |
| 43            | 1.412 | 0.369 | 5.403  |
| 44            | 0.893 | 0.350 | 2.279  |
| 52            | 0.786 | 0.429 | 1.441  |

|               |  |       |       |        |
|---------------|--|-------|-------|--------|
| 61            |  | 1.118 | 0.390 | 3.203  |
| Sub-total     |  |       |       |        |
| D+L pooled ES |  | 0.911 | 0.591 | 1.406  |
| -----         |  |       |       |        |
| Q - J         |  |       |       |        |
| 48            |  | 1.125 | 0.546 | 2.318  |
| Sub-total     |  |       |       |        |
| D+L pooled ES |  | 1.125 | 0.546 | 2.318  |
| -----         |  |       |       |        |
| L - D         |  |       |       |        |
| 49            |  | 1.010 | 0.861 | 1.185  |
| Sub-total     |  |       |       |        |
| D+L pooled ES |  | 1.010 | 0.861 | 1.185  |
| -----         |  |       |       |        |
| F - D         |  |       |       |        |
| 50            |  | 1.050 | 0.163 | 6.757  |
| Sub-total     |  |       |       |        |
| D+L pooled ES |  | 1.050 | 0.163 | 6.757  |
| -----         |  |       |       |        |
| G - D         |  |       |       |        |
| 57            |  | 2.000 | 0.684 | 5.851  |
| Sub-total     |  |       |       |        |
| D+L pooled ES |  | 2.000 | 0.684 | 5.851  |
| -----         |  |       |       |        |
| M - L         |  |       |       |        |
| 59            |  | 0.905 | 0.690 | 1.187  |
| Sub-total     |  |       |       |        |
| D+L pooled ES |  | 0.905 | 0.690 | 1.187  |
| -----         |  |       |       |        |
| E - D         |  |       |       |        |
| 63            |  | 0.480 | 0.125 | 1.837  |
| Sub-total     |  |       |       |        |
| D+L pooled ES |  | 0.480 | 0.125 | 1.837  |
| -----         |  |       |       |        |
| E - C         |  |       |       |        |
| 65            |  | 0.429 | 0.122 | 1.502  |
| Sub-total     |  |       |       |        |
| D+L pooled ES |  | 0.429 | 0.122 | 1.502  |
| -----         |  |       |       |        |
| H - C         |  |       |       |        |
| 69            |  | 0.500 | 0.050 | 4.978  |
| Sub-total     |  |       |       |        |
| D+L pooled ES |  | 0.500 | 0.050 | 4.978  |
| -----         |  |       |       |        |
| F - A         |  |       |       |        |
| 76            |  | 0.808 | 0.594 | 1.098  |
| Sub-total     |  |       |       |        |
| D+L pooled ES |  | 0.808 | 0.594 | 1.098  |
| -----         |  |       |       |        |
| E - B         |  |       |       |        |
| 77            |  | 3.150 | 0.136 | 72.885 |
| Sub-total     |  |       |       |        |
| D+L pooled ES |  | 3.150 | 0.136 | 72.885 |
| -----         |  |       |       |        |

Test(s) of heterogeneity:

|       | Heterogeneity<br>statistic | degrees of<br>freedom | P     | I-squared** | Tau-squared |
|-------|----------------------------|-----------------------|-------|-------------|-------------|
| R - J | 3.40                       | 2                     | 0.183 | 41.1%       | 0.0900      |
| K - A | 0.12                       | 1                     | 0.733 | 0.0%        | 0.0000      |
| P - A | 0.00                       | 0                     | .     | .%          | 0.0000      |
| P - K | 0.01                       | 1                     | 0.927 | 0.0%        | 0.0000      |
| I - A | 0.00                       | 0                     | .     | .%          | 0.0000      |
| Q - A | 0.00                       | 0                     | .     | .%          | 0.0000      |
| Q - I | 0.00                       | 0                     | .     | .%          | 0.0000      |
| N - B | 8.39                       | 4                     | 0.078 | 52.3%       | 0.0430      |
| B - A | 4.40                       | 6                     | 0.623 | 0.0%        | 0.0000      |
| N - A | 0.00                       | 0                     | .     | .%          | 0.0000      |
| O - B | 0.00                       | 0                     | .     | .%          | 0.0000      |
| F - C | 0.00                       | 0                     | .     | .%          | 0.0000      |
| C - B | 2.73                       | 2                     | 0.256 | 26.6%       | 0.2085      |
| L - K | 0.00                       | 0                     | .     | .%          | 0.0000      |
| D - B | 7.43                       | 6                     | 0.283 | 19.2%       | 0.0612      |
| D - C | 0.00                       | 0                     | .     | .%          | 0.0000      |
| G - B | 0.42                       | 1                     | 0.516 | 0.0%        | 0.0000      |
| L - A | 0.57                       | 1                     | 0.451 | 0.0%        | 0.0000      |
| J - A | 0.00                       | 0                     | .     | .%          | 0.0000      |

|       |      |   |       |      |        |
|-------|------|---|-------|------|--------|
| G - A | 0.00 | 0 | .     | .    | 0.0000 |
| D - A | 0.00 | 0 | .     | .    | 0.0000 |
| S - L | 0.00 | 0 | .     | .    | 0.0000 |
| F - B | 5.82 | 9 | 0.757 | 0.0% | 0.0000 |
| M - A | 0.00 | 0 | .     | .    | 0.0000 |
| T - B | 0.78 | 3 | 0.853 | 0.0% | 0.0000 |
| Q - J | 0.00 | 0 | .     | .    | 0.0000 |
| L - D | 0.00 | 0 | .     | .    | 0.0000 |
| F - D | 0.00 | 0 | .     | .    | 0.0000 |
| G - D | 0.00 | 0 | .     | .    | 0.0000 |
| M - L | 0.00 | 0 | .     | .    | 0.0000 |
| E - D | 0.00 | 0 | .     | .    | 0.0000 |
| E - C | 0.00 | 0 | .     | .    | 0.0000 |
| H - C | 0.00 | 0 | .     | .    | 0.0000 |
| F - A | 0.00 | 0 | .     | .    | 0.0000 |
| E - B | 0.00 | 0 | .     | .    | 0.0000 |

\*\* I-squared: the variation in ES attributable to heterogeneity)

**Net league table**

| DBP_O                    | 1.59<br>(0.35,7.<br>17)  | 0.96<br>(0.54,1.<br>71)  | 0.73<br>(0.43,1.<br>26)  | 0.98<br>(0.59,1.<br>63)  | 1.30<br>(0.58,2.<br>94)  | 1.20<br>(0.76,1.8<br>9)  | 1.02<br>(0.59,1.7<br>7)  | 1.19<br>(0.72,1.9<br>5)  | 0.76<br>(0.46,1.<br>25) | 1.15<br>(0.70,1.<br>89)  | 1.05<br>(0.63,1.<br>76)  | 0.54<br>(0.05,5.<br>74)  | 1.73<br>(0.77,3.<br>89) | 1.20<br>(0.74,1.<br>96)  | 0.58<br>(0.21,1.5<br>9)    | 1.13<br>(0.69,1.<br>84)  | 1.08<br>(0.63,1.<br>86)  | 1.10<br>(0.71,1.<br>69)  | 1.60<br>(1.00,2.<br>56)  |
|--------------------------|--------------------------|--------------------------|--------------------------|--------------------------|--------------------------|--------------------------|--------------------------|--------------------------|-------------------------|--------------------------|--------------------------|--------------------------|-------------------------|--------------------------|----------------------------|--------------------------|--------------------------|--------------------------|--------------------------|
| 0.63<br>(0.14,2<br>.85)  | Paliperi<br>done_<br>OS  | 0.60<br>(0.14,2.<br>65)  | 0.46<br>(0.11,2.<br>00)  | 0.62<br>(0.14,2.<br>64)  | 0.82<br>(0.17,4.<br>06)  | 0.76<br>(0.18,3.2<br>2)  | 0.65<br>(0.15,2.7<br>4)  | 0.75<br>(0.18,3.1<br>1)  | 0.48<br>(0.11,2.<br>04) | 0.72<br>(0.17,3.<br>08)  | 0.66<br>(0.15,2.<br>18)  | 0.34<br>(0.02,5.<br>31)  | 1.09<br>(0.22,5.<br>25) | 0.76<br>(0.18,3.<br>7)   | 0.37<br>(0.07,1.9<br>7)    | 0.71<br>(0.17,2.<br>97)  | 0.68<br>(0.16,2.<br>93)  | 0.69<br>(0.16,2.<br>93)  | 1.01<br>(0.62,2.<br>26)  |
| 1.04<br>(0.58,1.<br>.87) | 1.66<br>(0.38,7.<br>28)  | Risper<br>idone_<br>OS   | 0.77<br>(0.50,1.<br>52)  | 1.02<br>(0.69,1.<br>99)  | 1.36<br>(0.61,2.<br>99)  | 1.25<br>(0.83,1.8<br>8)  | 1.07<br>(0.67,1.7<br>0)  | 1.24<br>(0.83,1.8<br>6)  | 0.79<br>(0.54,1.<br>16) | 1.20<br>(0.81,1.<br>61)  | 1.10<br>(0.74,1.<br>63)  | 0.56<br>(0.05,5.<br>90)  | 1.80<br>(0.84,3.<br>88) | 1.25<br>(0.82,1.<br>91)  | 0.60<br>(0.23,1.6<br>0)    | 1.17<br>(0.78,1.<br>77)  | 1.13<br>(0.70,1.<br>82)  | 1.14<br>(0.78,1.<br>68)  | 1.67<br>(1.19,2.<br>35)  |
| 1.36<br>(0.80,2<br>.34)  | 2.16<br>(0.50,9.<br>36)  | 1.31<br>(0.86,1.<br>99)  | 0.56<br>(0.26,1.<br>21)  | 0.75<br>(0.54,1.<br>86)  | 1.34<br>(0.83,3.<br>79)  | 1.77<br>(1.16,2.3<br>0)  | 1.40<br>(0.93,2.1<br>0)  | 1.62<br>(1.15,2.2<br>4)  | 1.03<br>(0.75,1.<br>41) | 1.56<br>(1.12,2.<br>11)  | 1.44<br>(0.97,7.<br>83)  | 0.74<br>(0.07,7.<br>64)  | 2.36<br>(1.13,4.<br>92) | 2.36<br>(1.15,2.<br>35)  | 1.64<br>(0.31,2.0<br>18)   | 1.54<br>(1.08,2.<br>18)  | 1.47<br>(0.96,2.<br>26)  | 1.50<br>(1.09,2.<br>06)  | 2.18<br>(1.68,2.<br>84)  |
| 1.02<br>(0.61,1<br>.70)  | 1.62<br>(0.38,6.<br>94)  | 0.98<br>(0.66,1.<br>45)  | 0.75<br>(0.54,1.<br>04)  | 0.97<br>(0.63,2.<br>8)   | 1.33<br>(0.91,1.6<br>5)  | 1.22<br>(0.72,1.5<br>2)  | 1.05<br>(0.90,1.6<br>4)  | 1.21<br>(0.83,1.8<br>93) | 0.77<br>(0.54,1.<br>52) | 1.17<br>(0.90,1.<br>43)  | 1.07<br>(0.80,1.<br>68)  | 0.55<br>(0.05,5.<br>61)  | 1.77<br>(0.86,3.<br>61) | 1.23<br>(0.89,1.<br>68)  | 0.59<br>(0.23,1.5<br>1)    | 1.15<br>(0.85,1.<br>56)  | 1.10<br>(0.75,1.<br>63)  | 1.12<br>(0.85,1.<br>47)  | 1.63<br>(1.34,2.<br>00)  |
| 0.77<br>(0.34,1<br>.74)  | 1.22<br>(0.25,6.<br>05)  | 0.74<br>(0.33,1.<br>63)  | 0.56<br>(0.26,1.<br>21)  | 0.75<br>(0.36,1.<br>58)  | 0.92<br>(0.46,1.8<br>6)  | 0.79<br>(0.37,1.7<br>0)  | 0.92<br>(0.44,1.9<br>0)  | 0.58<br>(0.28,1.<br>21)  | 0.88<br>(0.42,1.<br>84) | 0.81<br>(0.39,1.<br>70)  | 0.42<br>(0.04,4.<br>69)  | 1.33<br>(0.50,3.<br>52)  | 0.93<br>(0.45,1.<br>92) | 0.45<br>(0.14,1.4<br>0)  | 0.87<br>(0.42,1.<br>80)    | 0.83<br>(0.39,1.<br>79)  | 0.84<br>(0.42,1.<br>68)  | 0.84<br>(0.42,1.<br>68)  | 1.23<br>(0.60,2.<br>52)  |
| 0.83<br>(0.31,1<br>.64)  | 1.32<br>(0.31,5.<br>64)  | 0.80<br>(0.53,1.<br>20)  | 0.61<br>(0.43,0.<br>86)  | 0.82<br>(0.61,1.<br>10)  | 1.08<br>(0.54,2.<br>19)  | Phenot<br>iazines_<br>OS | 0.85<br>(0.60,1.2<br>0)  | 0.99<br>(0.76,1.3<br>0)  | 0.63<br>(0.48,0.<br>84) | 0.96<br>(0.73,1.<br>26)  | 0.88<br>(0.65,1.<br>19)  | 0.45<br>(0.04,4.<br>61)  | 1.44<br>(0.77,1.<br>30) | 1.00<br>(0.19,1.2<br>1)  | 0.48<br>(0.22,1.4<br>23)   | 0.94<br>(0.72,1.<br>23)  | 0.90<br>(0.63,1.<br>28)  | 0.91<br>(0.80,1.<br>04)  | 1.34<br>(1.07,1.<br>66)  |
| 0.98<br>(0.56,1<br>.69)  | 1.55<br>(0.36,6.<br>58)  | 0.94<br>(0.59,1.<br>49)  | 0.72<br>(0.48,1.<br>08)  | 0.96<br>(0.66,1.<br>39)  | 1.27<br>(0.59,2.<br>73)  | 1.17<br>(0.82,1.6<br>7)  | 1.16<br>(0.67,1.1<br>3)  | 0.74<br>(0.52,1.<br>06)  | 1.12<br>(0.79,1.<br>60) | 1.03<br>(0.71,1.<br>50)  | 0.53<br>(0.05,5.<br>44)  | 1.69<br>(0.81,3.<br>51)  | 1.17<br>(0.81,1.<br>71) | 0.57<br>(0.22,1.4<br>47) | 1.10<br>(0.82,1.<br>47)    | 1.06<br>(0.71,1.<br>57)  | 1.07<br>(0.77,1.<br>50)  | 1.56<br>(1.14,2.<br>14)  |                          |
| 0.84<br>(0.51,1<br>.38)  | 1.33<br>(0.32,5.<br>54)  | 0.81<br>(0.54,1.<br>21)  | 0.62<br>(0.44,0.<br>87)  | 0.75<br>(0.61,1.<br>11)  | 1.09<br>(0.53,2.<br>27)  | 1.01<br>(0.77,1.3<br>2)  | 0.86<br>(0.67,1.1<br>1)  | 0.64<br>(0.48,0.<br>84)  | 0.96<br>(0.73,1.<br>27) | 0.88<br>(0.65,1.<br>20)  | 0.45<br>(0.04,4.<br>90)  | 1.45<br>(0.73,2.<br>90)  | 1.01<br>(0.75,1.<br>36) | 0.49<br>(0.20,1.2<br>10) | 0.95<br>(0.81,1.<br>10)    | 0.91<br>(0.66,1.<br>24)  | 0.92<br>(0.72,1.<br>17)  | 1.35<br>(1.08,1.<br>68)  |                          |
| 1.32<br>(0.80,2<br>.18)  | 2.10<br>(0.49,8.<br>95)  | 1.27<br>(0.86,1.<br>86)  | 0.97<br>(0.71,1.<br>33)  | 1.29<br>(1.08,1.<br>56)  | 1.72<br>(0.82,3.<br>58)  | 1.58<br>(1.20,2.1<br>0)  | 1.35<br>(0.95,1.9<br>4)  | 1.57<br>(1.19,2.0<br>8)  | 1.52<br>(1.19,2.<br>93) | 1.39<br>(1.06,1.<br>82)  | 2.29<br>(0.07,7.<br>34)  | 2.29<br>(1.13,4.<br>64)  | 1.59<br>(1.18,2.<br>15) | 0.77<br>(0.30,1.9<br>4)  | 1.49<br>(1.11,1.<br>99)    | 1.43<br>(0.98,2.<br>09)  | 1.45<br>(1.13,1.<br>87)  | 2.12<br>(1.78,2.<br>52)  |                          |
| 0.87<br>(0.53,1<br>.44)  | 1.38<br>(0.32,5.<br>90)  | 0.84<br>(0.47,0.<br>86)  | 0.64<br>(0.44,1.<br>11)  | 0.85<br>(0.66,1.<br>36)  | 1.13<br>(0.54,2.<br>36)  | 1.05<br>(0.79,1.3<br>7)  | 0.89<br>(0.63,1.2<br>7)  | 1.04<br>(0.79,1.3<br>8)  | 0.66<br>(0.52,0.<br>84) | 0.92<br>(0.71,1.<br>19)  | 0.47<br>(0.05,4.<br>84)  | 1.51<br>(0.74,3.<br>05)  | 1.05<br>(0.78,1.<br>41) | 0.51<br>(0.20,1.2<br>8)  | 0.98<br>(0.74,1.<br>31)    | 0.94<br>(0.65,1.<br>37)  | 0.96<br>(0.75,1.<br>22)  | 1.40<br>(1.18,1.<br>65)  |                          |
| 0.95<br>(0.57,1<br>.59)  | 1.51<br>(0.35,6.<br>46)  | 0.91<br>(0.61,1.<br>35)  | 0.70<br>(0.55,0.<br>89)  | 0.93<br>(0.70,1.<br>60)  | 1.23<br>(0.59,2.<br>60)  | 1.14<br>(0.84,1.5<br>4)  | 0.97<br>(0.67,1.4<br>2)  | 1.13<br>(0.84,1.5<br>3)  | 0.72<br>(0.55,0.<br>94) | 1.09<br>(0.84,1.<br>42)  | 0.51<br>(0.05,5.<br>29)  | 1.64<br>(0.80,3.<br>37)  | 1.14<br>(0.83,1.<br>58) | 0.55<br>(0.22,1.4<br>0)  | 1.07<br>(0.78,1.<br>46)    | 1.03<br>(0.69,1.<br>53)  | 1.04<br>(0.79,1.<br>38)  | 1.52<br>(1.24,1.<br>87)  |                          |
| 1.85<br>(0.17,1<br>9.62) | 2.93<br>(0.19,4<br>4.63) | 1.77<br>(0.17,1<br>8.54) | 1.36<br>(0.13,1<br>4.04) | 2.40<br>(0.18,1<br>8.64) | 2.22<br>(0.21,2<br>7.07) | 2.22<br>(0.22,2.2<br>68) | 1.89<br>(0.18,19.<br>39) | 2.20<br>(0.22,2.2<br>32) | 1.40<br>(0.14,14<br>17) | 2.12<br>(0.21,2<br>1.78) | 1.95<br>(0.19,2<br>0.05) | Aripipr<br>azole_L<br>AI | 3.20<br>(0.29,35<br>69) | 2.22<br>(0.22,2.2<br>79) | 1.07<br>(0.09,12.<br>11)   | 2.08<br>(0.21,2<br>1.10) | 2.00<br>(0.20,19<br>91)  | 2.03<br>(0.20,20<br>68)  | 2.96<br>(0.29,3<br>0.22) |
| 0.58<br>(0.26,1<br>.30)  | 0.92<br>(0.19,4.<br>47)  | 0.55<br>(0.26,1.<br>19)  | 0.42<br>(0.20,0.<br>88)  | 0.57<br>(0.28,1.<br>16)  | 0.75<br>(0.35,1.3<br>9)  | 0.69<br>(0.29,1.2<br>7)  | 0.59<br>(0.34,1.3<br>3)  | 0.69<br>(0.44,0.<br>89)  | 0.66<br>(0.33,1.<br>34) | 0.61<br>(0.30,1.<br>25)  | 0.31<br>(0.03,3.<br>49)  | Bromp<br>eridol_L<br>AI  | 0.70<br>(0.34,1.<br>42) | 0.34<br>(0.11,1.0<br>3)  | 0.65<br>(0.29,1.<br>29)    | 0.63<br>(0.30,1.<br>30)  | 0.63<br>(0.32,1.<br>26)  | 0.93<br>(0.47,1.<br>84)  |                          |
| 0.83<br>(0.51,1<br>.36)  | 1.32<br>(0.31,5.<br>65)  | 0.80<br>(0.52,1.<br>21)  | 0.61<br>(0.43,0.<br>87)  | 0.81<br>(0.59,1.<br>12)  | 1.08<br>(0.52,2.<br>24)  | 1.00<br>(0.77,1.3<br>0)  | 0.85<br>(0.58,1.2<br>4)  | 0.99<br>(0.73,1.3<br>3)  | 0.63<br>(0.47,0.<br>85) | 0.95<br>(0.71,1.<br>28)  | 0.88<br>(0.63,1.<br>21)  | 0.45<br>(0.04,4.<br>61)  | 1.44<br>(0.71,2.<br>93) | 0.48<br>(0.19,1.2<br>2)  | 0.94<br>(0.70,1.<br>26)    | 0.90<br>(0.63,1.<br>29)  | 0.91<br>(0.73,1.<br>15)  | 1.33<br>(1.04,1.<br>70)  |                          |
| 1.73<br>(0.63,4<br>.73)  | 2.74<br>(0.51,1<br>4.77) | 1.65<br>(0.62,4.<br>38)  | 1.27<br>(0.49,3.<br>27)  | 1.69<br>(0.66,4.<br>30)  | 2.24<br>(0.72,7.<br>02)  | 2.07<br>(0.83,5.1<br>9)  | 1.77<br>(0.69,4.5<br>0)  | 2.05<br>(0.83,5.0<br>3)  | 1.31<br>(0.52,3.<br>31) | 1.98<br>(0.78,5.<br>01)  | 1.82<br>(0.71,4.<br>63)  | 0.93<br>(0.08,10<br>98)  | 2.98<br>(0.97,9.<br>14) | 2.07<br>(0.82,5.<br>24)  | (Zu)clop<br>eridol_L<br>AI | 1.94<br>(0.80,4.<br>74)  | 1.87<br>(0.77,4.<br>55)  | 1.89<br>(0.76,4.<br>70)  | 2.76<br>(1.11,6.<br>88)  |
| 0.89<br>(0.54,1<br>.45)  | 1.41<br>(0.34,5.<br>90)  | 0.85<br>(0.56,1.<br>29)  | 0.65<br>(0.46,0.<br>92)  | 0.87<br>(0.64,1.<br>18)  | 1.15<br>(0.56,2.<br>39)  | 1.07<br>(0.82,1.3<br>9)  | 0.91<br>(0.68,1.2<br>2)  | 1.06<br>(0.91,1.2<br>3)  | 0.67<br>(0.50,0.<br>90) | 1.02<br>(0.77,1.<br>36)  | 0.93<br>(0.68,1.<br>28)  | 0.48<br>(0.05,4.<br>87)  | 1.54<br>(0.77,3.<br>05) | 1.07<br>(0.79,1.<br>44)  | 0.51<br>(0.21,1.2<br>6)    | 1.04<br>(0.78,1.<br>39)  | 0.96<br>(0.72,1.<br>28)  | 0.97<br>(0.77,1.<br>23)  | 1.42<br>(1.13,1.<br>80)  |
| 0.92<br>(0.54,1<br>.59)  | 1.47<br>(0.34,6.<br>31)  | 0.89<br>(0.55,1.<br>43)  | 0.68<br>(0.44,1.<br>04)  | 0.91<br>(0.61,1.<br>34)  | 1.20<br>(0.56,2.<br>58)  | 1.11<br>(0.78,1.5<br>8)  | 0.95<br>(0.64,1.4<br>1)  | 1.10<br>(0.80,1.5<br>1)  | 0.70<br>(0.48,1.<br>02) | 1.06<br>(0.73,1.<br>55)  | 0.97<br>(0.65,1.<br>45)  | 0.50<br>(0.05,4.<br>98)  | 1.60<br>(0.77,3.<br>33) | 1.11<br>(0.77,1.<br>60)  | 0.54<br>(0.22,1.3<br>1)    | 1.04<br>(0.78,1.<br>39)  | Flupen<br>thixol_L<br>AI | 1.01<br>(0.73,1.<br>41)  | 1.48<br>(1.06,2.<br>07)  |
| 0.91<br>(0.59,1<br>.41)  | 1.45<br>(0.34,6.<br>13)  | 0.87<br>(0.59,1.<br>29)  | 0.67<br>(0.49,0.<br>92)  | 0.89<br>(0.68,1.<br>17)  | 1.18<br>(0.59,2.<br>36)  | 1.09<br>(0.96,1.2<br>5)  | 0.93<br>(0.67,1.3<br>8)  | 1.08<br>(0.85,1.3<br>8)  | 0.69<br>(0.54,0.<br>89) | 1.05<br>(0.82,1.<br>34)  | 0.96<br>(0.73,1.<br>27)  | 0.49<br>(0.05,5.<br>02)  | 1.58<br>(0.80,3.<br>12) | 1.10<br>(0.87,1.<br>38)  | 0.53<br>(0.21,1.3<br>1)    | 1.03<br>(0.81,1.<br>30)  | 0.99<br>(0.71,1.<br>37)  | Fluphe<br>nazine_L<br>AI | 1.46<br>(1.22,1.<br>75)  |
| 0.62<br>(0.39,1<br>.00)  | 0.99<br>(0.23,4.<br>19)  | 0.60<br>(0.43,0.<br>84)  | 0.46<br>(0.35,0.<br>59)  | 0.61<br>(0.50,0.<br>75)  | 0.81<br>(0.40,1.<br>66)  | 0.75<br>(0.60,0.9<br>3)  | 0.64<br>(0.47,0.8<br>8)  | 0.74<br>(0.60,0.9<br>3)  | 0.47<br>(0.40,0.<br>56) | 0.72<br>(0.61,0.<br>85)  | 0.66<br>(0.53,0.<br>81)  | 0.34<br>(0.03,3.<br>45)  | 1.08<br>(0.54,2.<br>15) | 0.75<br>(0.59,0.<br>96)  | 0.36<br>(0.15,0.9<br>0)    | 0.70<br>(0.56,0.<br>89)  | 0.68<br>(0.48,0.<br>95)  | 0.69<br>(0.57,0.<br>82)  | _Placeb<br>o             |

Net league table: head-to-head comparisons. Relative risks (RRs) and 95% confidence intervals (CIs) are reported. RRs lower than 1 favour the column-defining treatment. Statistically significant results are highlighted in grey. LAI=long-acting antipsychotics

**Evaluation of heterogeneity and incoherence**

Overall heterogeneity  
Estimated between-studies SD: 8.605e-06

Overall incoherence  
Design-by-treatment test: P = 1.000

Loop-specific approach  
\* 20 triangular loops found

Note: Heterogeneity of loop A-D-F cannot be estimated due to insufficient observations - set equal to 0  
 Note: Heterogeneity of loop A-D-G cannot be estimated due to insufficient observations - set equal to 0  
 Note: Heterogeneity of loop A-D-L cannot be estimated due to insufficient observations - set equal to 0  
 Note: Heterogeneity of loop A-I-Q cannot be estimated due to insufficient observations - set equal to 0  
 Note: Heterogeneity of loop A-J-Q cannot be estimated due to insufficient observations - set equal to 0  
 Note: Heterogeneity of loop A-K-P cannot be estimated due to insufficient observations - set equal to 0  
 Note: Heterogeneity of loop A-L-M cannot be estimated due to insufficient observations - set equal to 0  
 Note: Heterogeneity of loop C-D-E cannot be estimated due to insufficient observations - set equal to 0  
 Note: Heterogeneity of loop C-D-F cannot be estimated due to insufficient observations - set equal to 0

Evaluation of inconsistency using loop-specific heterogeneity estimates:

| Loop  | ROR    | z_value | p_value | CI_95         | Loop_Heterog_tau2 |
|-------|--------|---------|---------|---------------|-------------------|
| A-D-L | 22.695 | 2.213   | 0.027   | (1.43,360.53) | 0.000             |
| A-D-F | 19.231 | 1.739   | 0.082   | (1.00,538.09) | 0.000             |
| A-B-D | 16.371 | 1.973   | 0.049   | (1.02,263.22) | 0.000             |
| B-C-E | 13.068 | 1.236   | 0.217   | (1.00,770.41) | 0.208             |
| B-D-E | 6.829  | 1.073   | 0.283   | (1.00,228.34) | 0.061             |
| A-D-G | 5.000  | 0.968   | 0.333   | (1.00,129.93) | 0.000             |
| A-B-G | 3.997  | 1.521   | 0.128   | (1.00,23.82)  | 0.000             |
| A-B-N | 2.628  | 2.097   | 0.036   | (1.07,6.49)   | 0.027             |
| A-K-L | 1.981  | 0.342   | 0.732   | (1.00,99.41)  | 0.000             |
| A-J-Q | 1.977  | 1.683   | 0.092   | (1.00,4.37)   | 0.000             |
| B-C-F | 1.933  | 1.196   | 0.232   | (1.00,5.69)   | 0.000             |
| A-L-M | 1.756  | 1.432   | 0.152   | (1.00,3.79)   | 0.000             |
| B-C-D | 1.640  | 0.852   | 0.394   | (1.00,5.12)   | 0.080             |
| B-D-G | 1.184  | 0.200   | 0.841   | (1.00,6.17)   | 0.034             |
| C-D-F | 1.174  | 0.154   | 0.877   | (1.00,8.99)   | 0.000             |
| C-D-E | 1.120  | 0.119   | 0.905   | (1.00,7.25)   | 0.000             |
| B-D-F | 1.101  | 0.099   | 0.921   | (1.00,7.46)   | 0.000             |
| A-B-F | 1.020  | 0.071   | 0.944   | (1.00,1.76)   | 0.000             |
| A-K-P | 1.014  | 0.065   | 0.948   | (1.00,1.53)   | 0.000             |
| A-I-Q | .      | .       | .       |               | 0.000             |

\*\*\* Note: Loop A-I-Q is formed only by multi-arm trial(s) - Consistent by definition

Consistency between direct and indirect estimates

| Side  | Direct           |                 | Indirect         |                 | Difference       |                 |              |
|-------|------------------|-----------------|------------------|-----------------|------------------|-----------------|--------------|
|       | Coef.            | Std. Err.       | Coef.            | Std. Err.       | Coef.            | Std. Err.       | P> z         |
| A B   | -.3734496        | .1178551        | -.4298108        | .2967929        | .0563612         | .3026162        | 0.852        |
| A D   | <b>-3.218876</b> | <b>1.40084</b>  | <b>-.3315153</b> | <b>.1192245</b> | <b>-2.887361</b> | <b>1.405904</b> | <b>0.040</b> |
| A F   | -.202566         | .1562625        | -.4294085        | .2033208        | .2268425         | .2543014        | 0.372        |
| A G   | -.9162907        | .7071068        | .3995487         | .4027846        | -1.315839        | .8137785        | 0.106        |
| A I * | -.4519991        | .1079238        | .9112431         | .797946         | -1.363242        | .8100099        | 0.092        |
| A J   | -.3015421        | .0874194        | -.9829579        | .3954351        | .6814158         | .4049828        | 0.092        |
| A K   | -.7509637        | .1078313        | -.7296974        | .4081093        | -.0212664        | .4267141        | 0.960        |
| A L   | <b>-.086766</b>  | <b>.1476732</b> | <b>-.5823408</b> | <b>.1722379</b> | <b>.4955748</b>  | <b>.2268772</b> | <b>0.029</b> |
| A M   | -.7490276        | .3371425        | -.3591431        | .1816856        | -.3898846        | .3829813        | 0.309        |
| A N   | <b>-.9363177</b> | <b>.2766563</b> | <b>-.134419</b>  | <b>.1272859</b> | <b>-.8018987</b> | <b>.3134181</b> | <b>0.011</b> |
| A P   | -.4788768        | .144703         | -.5244213        | .227806         | .0455444         | .2697803        | 0.866        |
| A Q * | -.8653629        | .1424108        | -.1837418        | .3791414        | -.6816211        | .405005         | 0.092        |
| B C   | -.4875902        | .3723537        | .1067015         | .1882738        | -.5942917        | .4172456        | 0.154        |
| B D   | -.0852512        | .1839333        | .1088991         | .1588868        | -.1941503        | .2430566        | 0.424        |
| B E   | 1.147424         | 1.602818        | -.8015453        | .4850251        | 1.948969         | 1.674599        | 0.244        |
| B F   | .0598            | .1292982        | .2394156         | .2771483        | -.1796156        | .3058256        | 0.557        |
| B G   | .8073323         | .5635957        | .2375497         | .4434336        | .5697826         | .717132         | 0.427        |
| B N * | .0975357         | .0665214        | -.6172999        | .4233085        | .7148356         | .4230566        | 0.091        |
| B O * | .1690245         | .3520984        | .7460434         | 178.064         | -.5770189        | 178.0644        | 0.997        |
| B T * | -.0928124        | .2212651        | .7700003         | 45.18303        | -.8628128        | 45.18348        | 0.985        |
| C D   | 3.70e-11         | .1698416        | .1530225         | .2843657        | -.1530225        | .331225         | 0.644        |
| C E   | -.8473077        | .6399391        | -.3957758        | .6462195        | -.4515319        | .9094583        | 0.620        |
| C F   | -.1115895        | .3846946        | .1722278         | .2118101        | -.2838172        | .4391508        | 0.518        |
| C H * | -.6931472        | 1.172604        | .6672542         | 196.6254        | -1.360401        | 196.6263        | 0.994        |
| D E   | -.7339756        | .68487          | -.6086856        | .6087229        | -.12529          | .9162897        | 0.891        |
| D F   | .0487902         | .9499373        | .0664191         | .1531565        | -.0176289        | .9622047        | 0.985        |
| D G   | .693158          | .5477174        | .2477049         | .4547474        | .4454532         | .7119003        | 0.531        |
| D L   | .0099772         | .0815686        | .4019608         | .2248633        | -.3919836        | .2392006        | 0.101        |
| I Q * | -.4133637        | .128084         | .9498783         | .788951         | -1.363242        | .8100098        | 0.092        |

|       |           |          |           |          |           |          |       |
|-------|-----------|----------|-----------|----------|-----------|----------|-------|
| J Q   | .117786   | .3689323 | -.5638206 | .1671016 | .6816067  | .4050112 | 0.092 |
| J R * | -.1800592 | .1513614 | .8041352  | 73.45313 | -.9841944 | 73.45324 | 0.989 |
| K L   | -.0194181 | 1.990267 | .4552716  | .1432419 | -.4746897 | 1.995415 | 0.812 |
| K P * | .2480109  | .1143595 | .359769   | .3986604 | -.1117581 | .4186953 | 0.790 |
| L M   | -.099321  | .138302  | -.4891997 | .357137  | .3898787  | .3829807 | 0.309 |
| L S * | .2876821  | .7264832 | .5727827  | 192.9611 | -.2851007 | 192.9629 | 0.999 |

\* Warning: all the evidence about these contrasts comes from the trials which directly compare them.

#### **Funnel plot**

Not applicable: no comparisons with 10 or more studies.

## Supplement Q - Secondary outcome: dropouts due to adverse events (tolerability)

### Treatment codes

|                      |   |
|----------------------|---|
| Placebo              | A |
| Fluphenazine LAI     | B |
| Flupenthixol LAI     | C |
| Haloperidol LAI      | D |
| (Zu)clopenthixol LAI | E |
| Pipothiazine LAI     | F |
| Bromperidol LAI      | G |
| Olanzapine LAI       | H |
| Risperidone LAI      | I |
| Aripiprazole LAI     | J |
| Paliperidone LAI-1   | K |
| Paliperidone LAI-3   | L |
| Phenothiazines OS    | M |
| Haloperidol OS       | N |
| Aripiprazole OS      | O |
| Olanzapine OS        | P |
| Risperidone OS       | Q |
| Quetiapine OS        | R |
| DBP_OS               | S |

### Network map

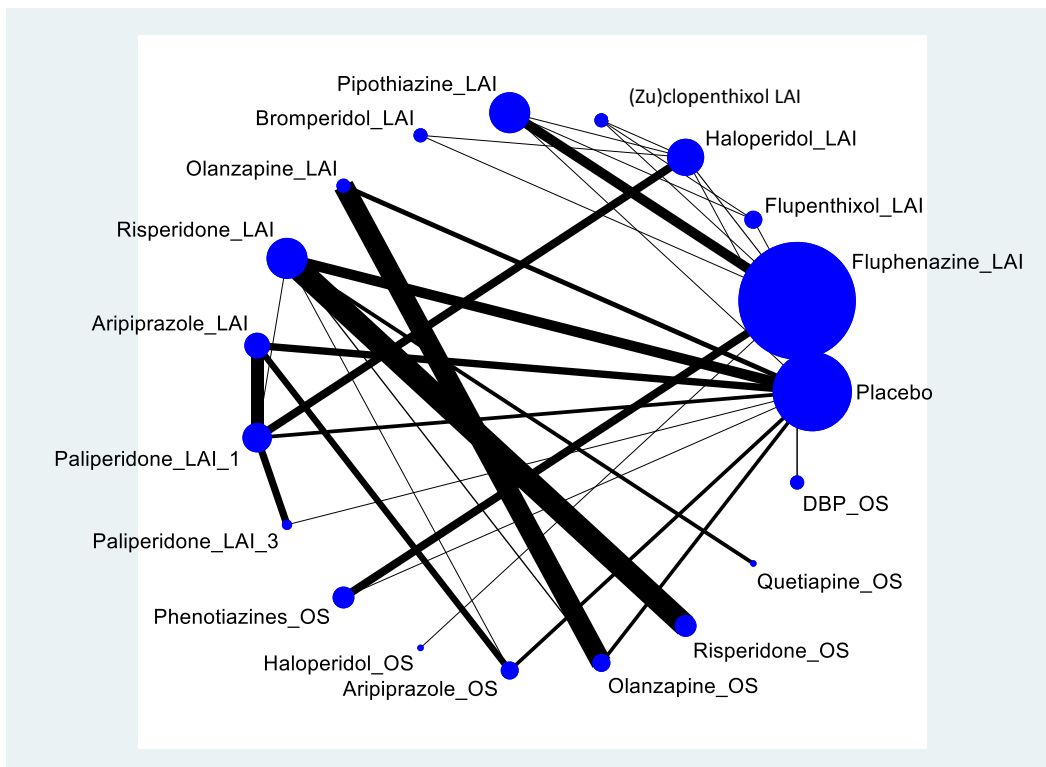

### Pairwise meta-analysis

| Study | ES    | [95% Conf. Interval] |
|-------|-------|----------------------|
| ----- |       |                      |
| Q - I |       |                      |
| 1     | 0.828 | 0.425 1.614          |
| 2     | 0.333 | 0.014 7.811          |
| 3     | 2.250 | 0.749 6.755          |
| 5     | 0.974 | 0.379 2.505          |

|       |               |       |       |         |
|-------|---------------|-------|-------|---------|
| 58    |               | 0.895 | 0.408 | 1.964   |
|       | Sub-total     |       |       |         |
|       | D+L pooled ES | 0.988 | 0.655 | 1.490   |
| ----- |               |       |       |         |
|       | J - A         |       |       |         |
| 6     |               | 0.565 | 0.209 | 1.524   |
| 39    |               | 0.897 | 0.307 | 2.623   |
|       | Sub-total     |       |       |         |
|       | D+L pooled ES | 0.699 | 0.337 | 1.449   |
| ----- |               |       |       |         |
|       | O - A         |       |       |         |
| 6     |               | 0.492 | 0.176 | 1.375   |
|       | Sub-total     |       |       |         |
|       | D+L pooled ES | 0.492 | 0.176 | 1.375   |
| ----- |               |       |       |         |
|       | O - J         |       |       |         |
| 6     |               | 0.872 | 0.321 | 2.370   |
| 7     |               | 1.507 | 0.431 | 5.268   |
|       | Sub-total     |       |       |         |
|       | D+L pooled ES | 1.079 | 0.494 | 2.356   |
| ----- |               |       |       |         |
|       | H - A         |       |       |         |
| 8     |               | 0.841 | 0.346 | 2.047   |
|       | Sub-total     |       |       |         |
|       | D+L pooled ES | 0.841 | 0.346 | 2.047   |
| ----- |               |       |       |         |
|       | P - A         |       |       |         |
| 8     |               | 0.596 | 0.211 | 1.687   |
|       | Sub-total     |       |       |         |
|       | D+L pooled ES | 0.596 | 0.211 | 1.687   |
| ----- |               |       |       |         |
|       | P - H         |       |       |         |
| 8     |               | 0.709 | 0.317 | 1.582   |
| 9     |               | 0.976 | 0.580 | 1.645   |
|       | Sub-total     |       |       |         |
|       | D+L pooled ES | 0.888 | 0.573 | 1.375   |
| ----- |               |       |       |         |
|       | M - B         |       |       |         |
| 11    |               | 0.448 | 0.009 | 21.981  |
| 12    |               | 0.205 | 0.048 | 0.874   |
| 13    |               | 0.100 | 0.006 | 1.761   |
| 14    |               | 0.973 | 0.418 | 2.266   |
|       | Sub-total     |       |       |         |
|       | D+L pooled ES | 0.423 | 0.138 | 1.299   |
| ----- |               |       |       |         |
|       | B - A         |       |       |         |
| 12    |               | 7.652 | 1.041 | 56.260  |
| 38    |               | 1.000 | 0.021 | 48.656  |
| 40    |               | 0.857 | 0.018 | 40.013  |
| 41    |               | 1.000 | 0.020 | 49.039  |
| 45    |               | 1.000 | 0.021 | 46.703  |
| 67    |               | 1.000 | 0.022 | 45.127  |
| 76    |               | 9.806 | 0.609 | 157.925 |
|       | Sub-total     |       |       |         |
|       | D+L pooled ES | 3.036 | 0.932 | 9.886   |
| ----- |               |       |       |         |
|       | M - A         |       |       |         |
| 12    |               | 1.571 | 0.152 | 16.226  |
|       | Sub-total     |       |       |         |
|       | D+L pooled ES | 1.571 | 0.152 | 16.226  |
| ----- |               |       |       |         |
|       | N - B         |       |       |         |
| 15    |               | 8.662 | 0.471 | 159.262 |
|       | Sub-total     |       |       |         |
|       | D+L pooled ES | 8.662 | 0.471 | 159.262 |
| ----- |               |       |       |         |
|       | R - I         |       |       |         |
| 17    |               | 1.667 | 0.612 | 4.537   |
|       | Sub-total     |       |       |         |
|       | D+L pooled ES | 1.667 | 0.612 | 4.537   |
| ----- |               |       |       |         |
|       | O - I         |       |       |         |
| 18    |               | 9.153 | 0.496 | 168.747 |
|       | Sub-total     |       |       |         |
|       | D+L pooled ES | 9.153 | 0.496 | 168.747 |
| ----- |               |       |       |         |
|       | F - C         |       |       |         |
| 20    |               | 0.708 | 0.015 | 33.972  |

|               |  |       |       |         |
|---------------|--|-------|-------|---------|
| Sub-total     |  |       |       |         |
| D+L pooled ES |  | 0.708 | 0.015 | 33.972  |
| -----         |  |       |       |         |
| C - B         |  |       |       |         |
| 21            |  | 1.000 | 0.020 | 48.822  |
| 66            |  | 0.354 | 0.015 | 8.381   |
| Sub-total     |  |       |       |         |
| D+L pooled ES |  | 0.536 | 0.046 | 6.232   |
| -----         |  |       |       |         |
| K - J         |  |       |       |         |
| 23            |  | 1.699 | 0.956 | 3.018   |
| 24            |  | 0.981 | 0.020 | 48.494  |
| Sub-total     |  |       |       |         |
| D+L pooled ES |  | 1.679 | 0.951 | 2.965   |
| -----         |  |       |       |         |
| G - B         |  |       |       |         |
| 27            |  | 3.125 | 0.134 | 73.014  |
| 56            |  | 0.333 | 0.015 | 7.584   |
| Sub-total     |  |       |       |         |
| D+L pooled ES |  | 1.011 | 0.110 | 9.298   |
| -----         |  |       |       |         |
| K - A         |  |       |       |         |
| 28            |  | 1.485 | 0.251 | 8.797   |
| 54            |  | 4.146 | 1.192 | 14.426  |
| Sub-total     |  |       |       |         |
| D+L pooled ES |  | 2.957 | 1.065 | 8.207   |
| -----         |  |       |       |         |
| I - A         |  |       |       |         |
| 29            |  | 1.001 | 0.544 | 1.841   |
| Sub-total     |  |       |       |         |
| D+L pooled ES |  | 1.001 | 0.544 | 1.841   |
| -----         |  |       |       |         |
| D - A         |  |       |       |         |
| 31            |  | 1.000 | 0.021 | 47.553  |
| 36            |  | 5.714 | 0.290 | 112.428 |
| Sub-total     |  |       |       |         |
| D+L pooled ES |  | 2.982 | 0.282 | 31.550  |
| -----         |  |       |       |         |
| F - B         |  |       |       |         |
| 33            |  | 0.608 | 0.106 | 3.497   |
| 51            |  | 1.000 | 0.020 | 48.822  |
| 53            |  | 0.311 | 0.033 | 2.909   |
| 64            |  | 3.273 | 0.138 | 77.570  |
| 68            |  | 1.000 | 0.068 | 14.640  |
| 71            |  | 0.522 | 0.011 | 24.698  |
| 76            |  | 0.895 | 0.410 | 1.952   |
| Sub-total     |  |       |       |         |
| D+L pooled ES |  | 0.820 | 0.438 | 1.535   |
| -----         |  |       |       |         |
| L - A         |  |       |       |         |
| 34            |  | 0.302 | 0.012 | 7.362   |
| Sub-total     |  |       |       |         |
| D+L pooled ES |  | 0.302 | 0.012 | 7.362   |
| -----         |  |       |       |         |
| K - I         |  |       |       |         |
| 42            |  | 5.667 | 0.295 | 108.909 |
| Sub-total     |  |       |       |         |
| D+L pooled ES |  | 5.667 | 0.295 | 108.909 |
| -----         |  |       |       |         |
| S - B         |  |       |       |         |
| 43            |  | 1.056 | 0.022 | 50.432  |
| 44            |  | 0.357 | 0.042 | 3.044   |
| 52            |  | 3.000 | 0.127 | 70.829  |
| Sub-total     |  |       |       |         |
| D+L pooled ES |  | 0.750 | 0.150 | 3.760   |
| -----         |  |       |       |         |
| D - B         |  |       |       |         |
| 46            |  | 1.033 | 0.021 | 50.423  |
| 47            |  | 2.727 | 0.125 | 59.574  |
| 55            |  | 0.063 | 0.004 | 1.091   |
| Sub-total     |  |       |       |         |
| D+L pooled ES |  | 0.496 | 0.045 | 5.476   |
| -----         |  |       |       |         |
| P - I         |  |       |       |         |
| 48            |  | 0.667 | 0.124 | 3.571   |
| Sub-total     |  |       |       |         |
| D+L pooled ES |  | 0.667 | 0.124 | 3.571   |
| -----         |  |       |       |         |



|               |  |       |               |
|---------------|--|-------|---------------|
| K - D         |  |       |               |
| 49            |  | 1.051 | 0.525 2.103   |
| Sub-total     |  |       |               |
| D+L pooled ES |  | 1.051 | 0.525 2.103   |
| -----         |  |       |               |
| F - D         |  |       |               |
| 50            |  | 0.349 | 0.015 8.102   |
| Sub-total     |  |       |               |
| D+L pooled ES |  | 0.349 | 0.015 8.102   |
| -----         |  |       |               |
| G - D         |  |       |               |
| 57            |  | 0.333 | 0.015 7.323   |
| Sub-total     |  |       |               |
| D+L pooled ES |  | 0.333 | 0.015 7.323   |
| -----         |  |       |               |
| L - K         |  |       |               |
| 59            |  | 1.172 | 0.563 2.438   |
| Sub-total     |  |       |               |
| D+L pooled ES |  | 1.172 | 0.563 2.438   |
| -----         |  |       |               |
| E - D         |  |       |               |
| 63            |  | 0.806 | 0.016 39.373  |
| Sub-total     |  |       |               |
| D+L pooled ES |  | 0.806 | 0.016 39.373  |
| -----         |  |       |               |
| E - C         |  |       |               |
| 65            |  | 1.000 | 0.020 48.822  |
| Sub-total     |  |       |               |
| D+L pooled ES |  | 1.000 | 0.020 48.822  |
| -----         |  |       |               |
| F - A         |  |       |               |
| 76            |  | 8.774 | 0.540 142.514 |
| Sub-total     |  |       |               |
| D+L pooled ES |  | 8.774 | 0.540 142.514 |
| -----         |  |       |               |
| E - B         |  |       |               |
| 77            |  | 1.050 | 0.022 50.430  |
| Sub-total     |  |       |               |
| D+L pooled ES |  | 1.050 | 0.022 50.430  |
| -----         |  |       |               |

Test(s) of heterogeneity:

|       | Heterogeneity<br>statistic | degrees of<br>freedom | P     | I-squared** | Tau-squared |
|-------|----------------------------|-----------------------|-------|-------------|-------------|
| Q - I | 2.94                       | 4                     | 0.568 | 0.0%        | 0.0000      |
| J - A | 0.38                       | 1                     | 0.536 | 0.0%        | 0.0000      |
| O - A | 0.00                       | 0                     | .     | .%          | 0.0000      |
| O - J | 0.45                       | 1                     | 0.503 | 0.0%        | 0.0000      |
| H - A | 0.00                       | 0                     | .     | .%          | 0.0000      |
| P - A | 0.00                       | 0                     | .     | .%          | 0.0000      |
| P - H | 0.43                       | 1                     | 0.512 | 0.0%        | 0.0000      |
| M - B | 4.87                       | 3                     | 0.181 | 38.4%       | 0.4897      |
| B - A | 3.20                       | 6                     | 0.784 | 0.0%        | 0.0000      |
| M - A | 0.00                       | 0                     | .     | .%          | 0.0000      |
| N - B | 0.00                       | 0                     | .     | .%          | 0.0000      |
| R - I | 0.00                       | 0                     | .     | .%          | 0.0000      |
| O - I | 0.00                       | 0                     | .     | .%          | 0.0000      |
| F - C | 0.00                       | 0                     | .     | .%          | 0.0000      |
| C - B | 0.16                       | 1                     | 0.685 | 0.0%        | 0.0000      |
| K - J | 0.07                       | 1                     | 0.785 | 0.0%        | 0.0000      |
| G - B | 0.98                       | 1                     | 0.323 | 0.0%        | 0.0000      |
| K - A | 0.86                       | 1                     | 0.354 | 0.0%        | 0.0000      |
| I - A | 0.00                       | 0                     | .     | .%          | 0.0000      |
| D - A | 0.49                       | 1                     | 0.484 | 0.0%        | 0.0000      |
| F - B | 1.70                       | 6                     | 0.945 | 0.0%        | 0.0000      |
| L - A | 0.00                       | 0                     | .     | .%          | 0.0000      |
| K - I | 0.00                       | 0                     | .     | .%          | 0.0000      |
| S - B | 1.23                       | 2                     | 0.541 | 0.0%        | 0.0000      |
| D - B | 3.31                       | 2                     | 0.191 | 39.6%       | 1.7881      |
| P - I | 0.00                       | 0                     | .     | .%          | 0.0000      |
| K - D | 0.00                       | 0                     | .     | .%          | 0.0000      |
| F - D | 0.00                       | 0                     | .     | .%          | 0.0000      |
| G - D | 0.00                       | 0                     | .     | .%          | 0.0000      |
| L - K | 0.00                       | 0                     | .     | .%          | 0.0000      |
| E - D | 0.00                       | 0                     | .     | .%          | 0.0000      |
| E - C | 0.00                       | 0                     | .     | .%          | 0.0000      |
| F - A | 0.00                       | 0                     | .     | .%          | 0.0000      |

E - B 0.00 0 . % 0.0000  
 \*\* I-squared: the variation in ES attributable to heterogeneity)

**Net league table**

|                     |                      |                      |                      |                      |                     |                     |                     |                      |                     |                      |                     |                        |                        |                     |                     |                     |                      |                      |
|---------------------|----------------------|----------------------|----------------------|----------------------|---------------------|---------------------|---------------------|----------------------|---------------------|----------------------|---------------------|------------------------|------------------------|---------------------|---------------------|---------------------|----------------------|----------------------|
| Aripiprazole_LAI    | 1.74<br>(0.24,12.68) | 1.90<br>(0.22,16.20) | 2.78<br>(0.97,7.6)   | 2.05<br>(0.95,4.4)   | 0.82<br>(0.31,2.17) | 2.00<br>(1.21,3.30) | 2.12<br>(0.89,5.03) | 2.22<br>(0.69,7.2)   | 0.95<br>(0.43,2.08) | 2.09<br>(0.18,24.8)  | 1.07<br>(0.60,1.89) | 1.64<br>(0.47,5.7)     | 24.08<br>(1.09,532.31) | 1.02<br>(0.49,2.11) | 0.72<br>(0.27,1.95) | 0.94<br>(0.39,2.27) | 1.58<br>(0.44,5.6)   | 2.08<br>(0.30,14.30) |
| 0.58<br>(0.08,4.20) | Bromperidol_LAI      | 1.09<br>(0.08,15.22) | 1.60<br>(0.26,10.02) | 1.18<br>(0.17,8.0)   | 0.47<br>(0.06,3.90) | 1.15<br>(0.16,8.15) | 1.22<br>(0.15,9.78) | 1.28<br>(0.19,8.7)   | 0.55<br>(0.07,4.18) | 1.20<br>(0.06,22.9)  | 0.62<br>(0.09,4.37) | 0.94<br>(0.13,6.6)     | 13.85<br>(0.44,432.78) | 0.59<br>(0.07,4.69) | 0.42<br>(0.05,3.47) | 0.54<br>(0.07,4.30) | 0.91<br>(0.09,8.7)   | 1.20<br>(0.13,8.0)   |
| 0.53<br>(0.06,4.51) | 0.92<br>(0.07,12.78) | Flupentixol_LAI      | 1.47<br>(0.22,9.8)   | 1.08<br>(0.13,9.0)   | 0.43<br>(0.05,4.10) | 1.05<br>(0.13,8.84) | 1.12<br>(0.12,10.4) | 1.17<br>(0.17,8.2)   | 0.50<br>(0.06,4.42) | 1.10<br>(0.08,14.7)  | 0.56<br>(0.07,4.6)  | 0.86<br>(0.11,6.5)     | 12.70<br>(0.39,412.58) | 0.54<br>(0.06,4.98) | 0.38<br>(0.04,3.64) | 0.49<br>(0.05,4.54) | 0.83<br>(0.08,9.1)   | 1.10<br>(0.09,13.37) |
| 0.36<br>(0.13,1.03) | 0.63<br>(0.10,3.92)  | 0.68<br>(0.10,4.6)   | Fluphenazine_LAI     | 0.74<br>(0.27,2.0)   | 0.29<br>(0.08,1.03) | 0.72<br>(0.26,2.00) | 0.76<br>(0.22,2.63) | 0.80<br>(0.44,1.47)  | 0.34<br>(0.11,1.04) | 0.75<br>(0.07,7.97)  | 0.38<br>(0.15,1.01) | 0.59<br>(0.29,1.1)     | 8.66<br>(0.47,159.24)  | 0.37<br>(0.11,1.23) | 0.26<br>(0.07,0.92) | 0.34<br>(0.10,1.10) | 0.57<br>(0.13,2.5)   | 0.75<br>(0.15,3.7)   |
| 0.49<br>(0.22,1.06) | 0.85<br>(0.12,5.79)  | 0.92<br>(0.11,7.6)   | 1.35<br>(0.49,3.7)   | Haloperidol_LAI      | 0.40<br>(0.13,1.22) | 0.97<br>(0.51,1.83) | 1.03<br>(0.40,2.67) | 1.08<br>(0.35,3.3)   | 0.46<br>(0.18,1.20) | 1.02<br>(0.09,11.4)  | 0.52<br>(0.24,1.15) | 0.80<br>(0.23,2.7)     | 11.72<br>(0.54,256.35) | 0.50<br>(0.18,1.37) | 0.35<br>(0.09,0.99) | 0.46<br>(0.16,1.29) | 0.77<br>(0.19,3.0)   | 1.02<br>(0.15,6.8)   |
| 1.22<br>(0.46,3.24) | 2.12<br>(0.26,17.58) | 2.32<br>(0.24,22.01) | 3.40<br>(0.98,11.83) | 2.51<br>(0.82,7.7)   | Olanzapine_LAI      | 2.44<br>(0.90,6.58) | 2.59<br>(0.77,8.67) | 2.72<br>(0.70,10.52) | 1.16<br>(0.47,2.88) | 2.56<br>(0.19,33.6)  | 1.31<br>(0.59,2.89) | 2.00<br>(0.49,8.2)     | 29.41<br>(1.24,698.57) | 1.24<br>(0.41,3.80) | 0.88<br>(0.57,1.36) | 1.15<br>(0.42,3.11) | 1.93<br>(0.50,7.4)   | 2.55<br>(0.33,19.56) |
| 0.50<br>(0.30,0.83) | 0.87<br>(0.12,6.1)   | 0.95<br>(0.11,7.9)   | 1.39<br>(0.50,3.8)   | 1.03<br>(0.55,1.9)   | 0.41<br>(0.15,1.11) | Paliperidone_LAI_1  | 1.06<br>(0.35,3.1)  | 1.11<br>(0.35,3.5)   | 0.48<br>(0.21,1.06) | 1.05<br>(0.09,12.1)  | 0.54<br>(0.29,0.98) | 0.82<br>(0.24,2.7)     | 12.07<br>(0.55,264.13) | 0.51<br>(0.22,1.18) | 0.36<br>(0.13,0.99) | 0.47<br>(0.19,1.16) | 0.79<br>(0.25,2.8)   | 1.04<br>(0.15,7.0)   |
| 0.47<br>(0.20,1.12) | 0.82<br>(0.10,6.5)   | 0.90<br>(0.10,8.4)   | 1.31<br>(0.38,4.5)   | 0.97<br>(0.37,2.5)   | 0.39<br>(0.12,1.1)  | 0.94<br>(0.46,1.92) | 1.05<br>(0.27,4.0)  | 0.45<br>(0.16,1.29)  | 0.99<br>(0.08,12.6) | 0.50<br>(0.20,1.26)  | 0.77<br>(0.19,3.1)  | 11.36<br>(0.48,268.91) | 0.48<br>(0.16,1.43)    | 0.34<br>(0.10,1.16) | 0.44<br>(0.14,1.38) | 0.75<br>(0.17,3.2)  | 0.98<br>(0.13,7.5)   |                      |
| 0.45<br>(0.14,1.46) | 0.78<br>(0.11,5.3)   | 0.85<br>(0.12,6.0)   | 1.25<br>(0.68,2.3)   | 0.92<br>(0.30,2.8)   | 0.37<br>(0.10,1.43) | 0.90<br>(0.29,2.83) | 0.95<br>(0.25,2.65) | 0.43<br>(0.13,1.46)  | 0.94<br>(0.08,10.5) | 0.48<br>(0.16,1.44)  | 0.74<br>(0.29,1.8)  | 10.83<br>(0.55,212.10) | 0.46<br>(0.12,1.71)    | 0.32<br>(0.08,1.27) | 0.42<br>(0.14,1.54) | 0.71<br>(0.12,3.4)  | 0.94<br>(0.15,7.2)   |                      |
| 0.48<br>(0.24,3.0)  | 1.83<br>(0.24,13.99) | 2.00<br>(0.23,17.61) | 2.93<br>(0.97,8.8)   | 2.16<br>(0.83,5.6)   | 0.86<br>(0.35,2.14) | 2.10<br>(0.94,4.67) | 2.23<br>(0.78,6.41) | 2.34<br>(0.69,7.9)   | Risperidone_LAI     | 2.20<br>(0.18,27.1)  | 1.13<br>(0.64,1.97) | 1.72<br>(0.47,6.3)     | 25.35<br>(1.12,571.43) | 1.07<br>(0.42,2.75) | 0.76<br>(0.30,1.90) | 0.99<br>(0.65,1.4)  | 1.67<br>(0.61,4.5)   | 2.19<br>(0.31,15.53) |
| 0.48<br>(0.04,5.66) | 0.83<br>(0.04,15.79) | 0.91<br>(0.07,12.10) | 1.33<br>(0.13,14.04) | 0.98<br>(0.09,11.01) | 0.39<br>(0.03,5.3)  | 0.95<br>(0.08,11.0) | 1.01<br>(0.08,12.9) | 1.06<br>(0.09,11.8)  | 0.45<br>(0.04,5.58) | (Zuclopenthixol_LAI) | 0.51<br>(0.07,9.1)  | 0.78<br>(0.07,9.1)     | 11.50<br>(0.27,487.53) | 0.49<br>(0.04,6.20) | 0.34<br>(0.03,4.56) | 0.45<br>(0.04,5.70) | 0.76<br>(0.05,11.28) | 1.00<br>(0.06,17.33) |
| 0.94<br>(0.53,1.66) | 1.63<br>(0.23,11.54) | 1.77<br>(0.22,14.58) | 2.60<br>(0.99,6.8)   | 1.92<br>(0.87,4.2)   | 0.77<br>(0.35,1.70) | 1.87<br>(1.02,3.40) | 1.98<br>(0.79,4.94) | 2.08<br>(0.69,6.2)   | 0.89<br>(0.51,1.56) | 1.96<br>(0.17,22.7)  | Placebo             | 1.53<br>(0.47,4.9)     | 22.52<br>(1.05,483.39) | 0.95<br>(0.43,2.10) | 0.68<br>(0.30,1.53) | 0.88<br>(0.44,1.76) | 1.48<br>(0.47,4.6)   | 1.95<br>(0.30,12.75) |
| 0.61<br>(0.18,2.13) | 1.06<br>(0.15,7.5)   | 1.16<br>(0.15,8.8)   | 1.70<br>(0.85,3.4)   | 1.25<br>(0.37,4.2)   | 0.50<br>(0.12,2.06) | 1.22<br>(0.36,4.15) | 1.29<br>(0.32,5.30) | 1.36<br>(0.54,3.4)   | 0.58<br>(0.16,2.12) | 1.28<br>(0.11,14.9)  | 0.65<br>(0.20,2.11) | Phenothiazines_OS      | 14.70<br>(0.74,293.38) | 0.62<br>(0.16,2.48) | 0.44<br>(0.11,1.84) | 0.57<br>(0.15,2.23) | 0.97<br>(0.19,4.7)   | 1.27<br>(0.22,7.3)   |
| 0.04<br>(0.00,0.92) | 0.07<br>(0.00,2.2)   | 0.08<br>(0.00,2.5)   | 0.12<br>(0.01,2.1)   | 0.09<br>(0.00,1.8)   | 0.03<br>(0.00,0.81) | 0.08<br>(0.00,1.81) | 0.09<br>(0.00,2.08) | 0.09<br>(0.00,1.8)   | 0.04<br>(0.00,0.89) | 0.09<br>(0.00,3.69)  | 0.04<br>(0.00,1.3)  | 0.07<br>(0.00,1.6)     | Haloperidol_OS         | 0.04<br>(0.00,0.99) | 0.03<br>(0.00,0.72) | 0.04<br>(0.00,0.90) | 0.07<br>(0.00,1.7)   | 0.09<br>(0.00,2.4)   |
| 0.98<br>(0.47,2.04) | 1.71<br>(0.21,13.68) | 1.86<br>(0.20,17.29) | 2.73<br>(0.82,9.1)   | 2.02<br>(0.73,5.5)   | 0.80<br>(0.26,2.46) | 1.96<br>(0.85,4.55) | 2.08<br>(0.70,6.21) | 2.19<br>(0.59,8.1)   | 0.93<br>(0.36,2.40) | 2.06<br>(0.16,26.3)  | 1.05<br>(0.48,2.32) | 1.61<br>(0.40,6.4)     | 23.67<br>(1.01,553.74) | Aripiprazole_OS     | 0.71<br>(0.23,2.0)  | 0.92<br>(0.33,2.58) | 1.56<br>(0.39,6.1)   | 2.05<br>(0.27,15.37) |
| 1.38<br>(0.51,3.74) | 2.41<br>(0.27,25.09) | 2.63<br>(1.09,13.58) | 3.85<br>(1.09,13.8)  | 2.84<br>(0.91,8.8)   | 1.13<br>(0.74,1.75) | 2.76<br>(1.01,7.58) | 2.93<br>(0.86,9.95) | 3.08<br>(0.79,12.07) | 1.32<br>(0.53,3.28) | 2.90<br>(0.22,38.3)  | 1.48<br>(0.66,3.35) | 2.27<br>(0.54,9.4)     | 33.35<br>(1.40,796.05) | 1.41<br>(0.45,4.37) | Olanzapine_OS       | 1.30<br>(0.48,3.54) | 2.19<br>(0.57,8.5)   | 2.89<br>(0.37,22.35) |
| 1.07<br>(0.44,2.58) | 1.85<br>(0.23,14.58) | 2.02<br>(0.22,18.6)  | 2.96<br>(0.91,9.6)   | 2.19<br>(0.77,6.2)   | 0.87<br>(0.32,2.37) | 2.13<br>(0.87,5.22) | 2.26<br>(0.73,7.01) | 2.37<br>(0.65,8.6)   | 1.01<br>(0.67,1.53) | 2.23<br>(0.18,28.3)  | 1.14<br>(0.57,2.28) | 1.75<br>(0.45,6.8)     | 25.65<br>(1.11,594.22) | 1.08<br>(0.39,3.03) | Risperidone_OS      | 0.77<br>(0.28,2.10) | 1.69<br>(0.57,4.9)   | 2.22<br>(0.30,16.40) |
| 0.63<br>(0.18,2.25) | 1.10<br>(0.11,10.59) | 1.20<br>(0.11,13.16) | 1.76<br>(0.39,7.8)   | 1.30<br>(0.32,5.1)   | 0.52<br>(0.13,2.00) | 1.26<br>(0.35,4.54) | 1.34<br>(0.31,5.74) | 1.40<br>(0.29,6.8)   | 0.60<br>(0.22,1.63) | 1.32<br>(0.09,19.7)  | 0.68<br>(0.21,2.13) | 1.03<br>(0.20,5.3)     | 15.21<br>(0.58,401.13) | 0.64<br>(0.16,2.54) | 0.46<br>(0.12,1.77) | 0.59<br>(0.20,1.75) | Quetiapine_OS        | 1.32<br>(0.15,11.86) |
| 0.48<br>(0.07,3.29) | 0.83<br>(0.07,9.5)   | 0.91<br>(0.07,11.06) | 1.33<br>(0.27,6.6)   | 0.99<br>(0.15,6.6)   | 0.39<br>(0.05,3.02) | 0.96<br>(0.14,6.46) | 1.02<br>(0.13,7.76) | 1.07<br>(0.19,5.9)   | 0.46<br>(0.06,3.22) | 1.00<br>(0.06,17.4)  | 0.51<br>(0.08,3.35) | 0.79<br>(0.14,4.5)     | 11.55<br>(0.41,322.08) | 0.49<br>(0.07,3.66) | 0.35<br>(0.04,2.68) | 0.45<br>(0.06,3.32) | 0.76<br>(0.08,6.8)   | DBP_OS               |

Net league table: head-to-head comparisons. Relative risks (RRs) and 95% confidence intervals (CIs) are reported. RRs lower than 1 favour the column-defining treatment. Statistically significant results are highlighted in grey. LAI=long-acting antipsychotics

**Evaluation of heterogeneity and incoherence**

Overall heterogeneity  
 Estimated-between-studies SD: 1.303e-08

Overall incoherence  
 Design-by-treatment test: P = 1.000

Loop-specific approach  
 \* 17 triangular loops found  
 \* 2 quadratic loops found

- Note: Heterogeneity of loop A-D-F cannot be estimated due to insufficient observations - set equal to 0
- Note: Heterogeneity of loop A-H-P cannot be estimated due to insufficient observations - set equal to 0
- Note: Heterogeneity of loop A-I-K cannot be estimated due to insufficient observations - set equal to 0
- Note: Heterogeneity of loop A-I-O cannot be estimated due to insufficient observations - set equal to 0
- Note: Heterogeneity of loop A-I-P cannot be estimated due to insufficient observations - set equal to 0
- Note: Heterogeneity of loop A-J-O cannot be estimated due to insufficient observations - set equal to 0
- Note: Heterogeneity of loop A-K-L cannot be estimated due to insufficient observations - set equal to 0
- Note: Heterogeneity of loop B-C-E cannot be estimated due to insufficient observations - set equal to 0
- Note: Heterogeneity of loop C-D-E-F cannot be estimated due to insufficient observations - set equal to 0

Evaluation of inconsistency using loop-specific heterogeneity estimates:

| Loop    | ROR    | z_value | p_value | CI_95          | Loop_Heterog_tau2 |
|---------|--------|---------|---------|----------------|-------------------|
| A-I-O   | 18.595 | 1.819   | 0.069   | (1.00,433.71)  | 0.000             |
| A-K-L   | 11.465 | 1.393   | 0.164   | (1.00,354.39)  | 0.000             |
| A-D-F   | 8.425  | 0.867   | 0.386   | (1.00,1043.32) | 0.000             |
| B-D-G   | 6.270  | 0.706   | 0.480   | (1.00,1027.18) | 1.146             |
| B-D-F   | 5.177  | 0.872   | 0.383   | (1.00,208.87)  | 0.000             |
| A-B-F   | 4.133  | 0.868   | 0.386   | (1.00,101.99)  | 0.000             |
| B-D-E   | 2.628  | 0.269   | 0.788   | (1.00,3013.28) | 1.788             |
| A-J-K   | 2.519  | 1.315   | 0.189   | (1.00,9.98)    | 0.000             |
| I-J-K-O | 2.514  | 0.424   | 0.672   | (1.00,178.38)  | 0.000             |
| A-B-D   | 2.166  | 0.471   | 0.638   | (1.00,54.05)   | 0.000             |
| B-C-F   | 2.162  | 0.327   | 0.744   | (1.00,220.63)  | 0.000             |
| A-J-O   | 2.138  | 0.839   | 0.401   | (1.00,12.62)   | 0.000             |
| B-C-E   | 1.961  | 0.220   | 0.826   | (1.00,799.68)  | 0.000             |
| A-I-K   | 1.918  | 0.401   | 0.689   | (1.00,46.40)   | 0.000             |
| C-D-E-F | 1.634  | 0.130   | 0.897   | (1.00,2737.21) | 0.000             |
| A-B-M   | 1.471  | 0.266   | 0.790   | (1.00,25.25)   | 0.000             |
| A-H-P   | 1.378  | 0.429   | 0.668   | (1.00,5.96)    | 0.000             |
| A-I-P   | 1.119  | 0.106   | 0.915   | (1.00,8.84)    | 0.000             |
| A-D-K   | 1.060  | 0.043   | 0.966   | (1.00,15.19)   | 0.000             |

Consistency between direct and indirect estimates

| Side       | Direct<br>Coef.  | Std. Err.       | Indirect<br>Coef. | Std. Err.       | Difference<br>Coef. | Std. Err.      | P> z         |
|------------|------------------|-----------------|-------------------|-----------------|---------------------|----------------|--------------|
| A B        | 1.093994         | .5543409        | .6824532          | .7056445        | .4115404            | .7638189       | 0.590        |
| A D        | 1.092645         | 1.20356         | .596386           | .4299559        | .4962586            | 1.278053       | 0.698        |
| A F        | 1.4379           | .9120406        | .3258564          | .6961583        | 1.112043            | 1.134032       | 0.327        |
| A H        | -.1513444        | .444427         | -.656908          | .7330177        | .5055636            | .7918308       | 0.523        |
| A I        | .0005517         | .3111993        | -.7726517         | .7300191        | .7732034            | .7935823       | 0.330        |
| A J        | -.3496527        | .371781         | .3834839          | .4689722        | -.7331365           | .5975703       | 0.220        |
| A K        | 1.084011         | .5209137        | .3804392          | .3788665        | .7035715            | .6441203       | 0.275        |
| A L        | -1.19641         | 1.628989        | .8515311          | .4866171        | -2.047941           | 1.700118       | 0.228        |
| A M        | -.145812         | 1.144891        | .6215479          | .6849611        | -.7673598           | 1.308956       | 0.558        |
| <b>A O</b> | <b>-.7085081</b> | <b>.5237457</b> | <b>.9206599</b>   | <b>.6356015</b> | <b>-1.629168</b>    | <b>.822784</b> | <b>0.048</b> |
| A P        | -.5330278        | .5298171        | -.192348          | .6261275        | -.3406798           | .7956937       | 0.669        |
| B C        | -.6244608        | 1.252125        | -.01265           | 1.548079        | -.6118108           | 1.991064       | 0.759        |
| B D        | -.7904557        | .9396862        | -.0876931         | .6243315        | -.7027626           | 1.128185       | 0.533        |
| B E        | .0487901         | 1.975444        | -.4793649         | 1.517716        | .528155             | 2.491153       | 0.832        |
| B F        | -.2014391        | .3199624        | -.5817055         | 1.276276        | .3802664            | 1.314847       | 0.772        |
| B G        | .0109534         | 1.132061        | -1.510818         | 1.666128        | 1.521771            | 2.01433        | 0.450        |
| B M *      | -.5461104        | .355279         | 1.870528          | 2.327667        | -2.416638           | 2.316729       | 0.297        |
| B N *      | 2.158906         | 1.485561        | -2.932228         | 452.2603        | 5.091134            | 452.2667       | 0.991        |
| B S *      | -.2878044        | .8225762        | -1.757196         | 134.5033        | 1.469391            | 134.5042       | 0.991        |
| C E        | 3.34e-11         | 1.983805        | .1785541          | 1.774735        | -.1785541           | 2.661798       | 0.947        |
| C F        | -.3448404        | 1.974718        | .3314567          | 1.156146        | -.6762971           | 2.288271       | 0.768        |
| D E        | -.2162231        | 1.984374        | .1682483          | 1.575592        | -.3844714           | 2.533817       | 0.879        |
| D F        | -1.052064        | 1.604235        | .2502455          | .6237515        | -1.302309           | 1.72123        | 0.449        |
| D G        | -1.098548        | 1.576326        | .422989           | 1.25411         | -1.521537           | 2.014325       | 0.450        |
| D K        | .0496995         | .3538818        | -.4384754         | .8090713        | .4881749            | .883079        | 0.580        |
| H P *      | -.1190392        | .2231791        | -.4919049         | 2.018532        | .3728657            | 2.0419         | 0.855        |
| I K        | 1.734556         | 1.508126        | .6638788          | .4236949        | 1.070677            | 1.566512       | 0.494        |
| I O        | 2.214027         | 1.486945        | -.1818619         | .5078094        | 2.395889            | 1.571266       | 0.127        |
| I P        | -.4054678        | .8563483        | -.2190133         | .5558992        | -.1864545           | 1.020958       | 0.855        |
| I Q *      | -.0120966        | .2098005        | .3064432          | 77.14933        | -.3185398           | 77.14958       | 0.997        |
| I R *      | .5108256         | .5109138        | .1720893          | 415.7471        | .3387363            | 415.7476       | 0.999        |
| J K        | .5183547         | .290088         | 1.296891          | .5437999        | -.7785367           | .6163355       | 0.207        |
| J O        | .0881477         | .398582         | -.4430538         | .9937721        | .5312015            | 1.063915       | 0.618        |
| K L        | .1588492         | .3737011        | -1.889087         | 1.658525        | 2.047936            | 1.700105       | 0.228        |

\* Warning: all the evidence about these contrasts comes from the trials which directly compare them.

Funnel plot

Not applicable: no comparisons with 10 or more studies.

## Supplement R - Secondary outcome: efficacy measured as mean change at the end of the study

### Treatment codes

|                      |   |
|----------------------|---|
| Placebo              | A |
| Fluphenazine LAI     | B |
| Flupenthixol LAI     | C |
| Haloperidol LAI      | D |
| (Zu)clopenthixol LAI | E |
| Pipothiazine LAI     | F |
| Bromperidol LAI      | G |
| Perphenazine LAI     | H |
| Olanzapine LAI       | I |
| Risperidone LAI      | J |
| Aripiprazole LAI     | K |
| Paliperidone LAI-1   | L |
| Paliperidone LAI-3   | M |
| Haloperidol OS       | N |
| Aripiprazole OS      | O |
| Olanzapine OS        | P |
| Risperidone OS       | Q |
| Quetiapine OS        | R |
| Paliperidone OS      | S |

### Network map

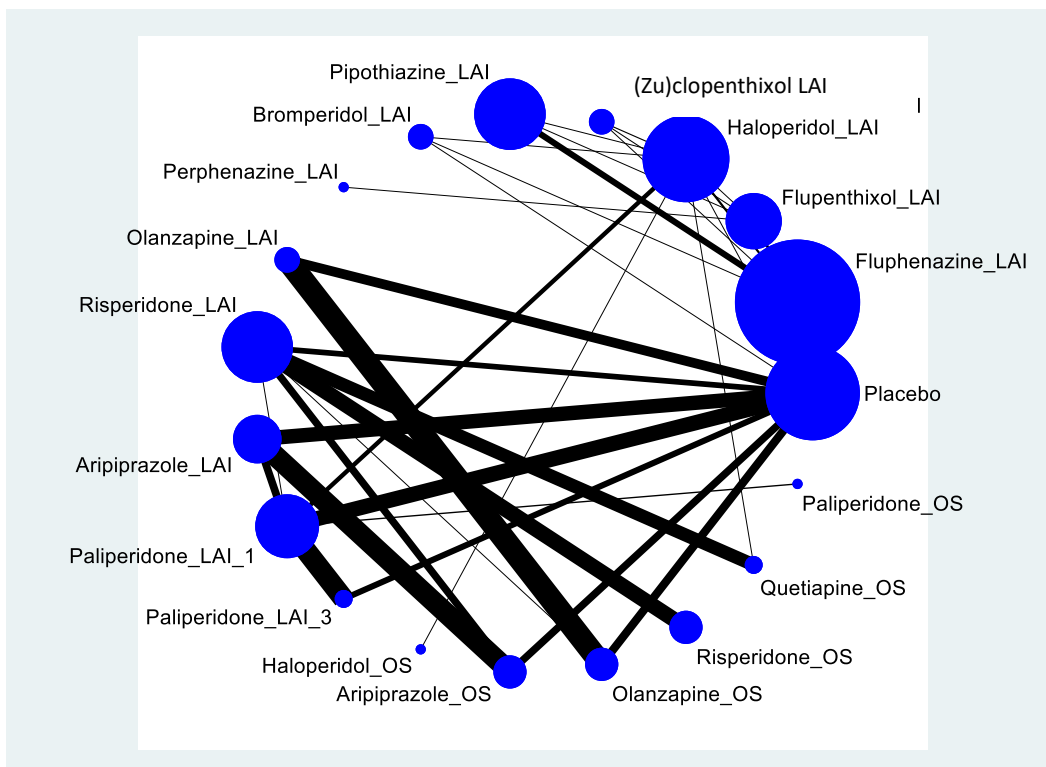

### Pairwise meta-analysis

| Study | ES     | [95% Conf. Interval] |
|-------|--------|----------------------|
| Q - J |        |                      |
| 1     | -0.078 | -0.247 0.091         |
| 2     | -0.247 | -0.804 0.309         |
| 4     | -0.020 | -0.422 0.383         |

|       |               |        |        |        |
|-------|---------------|--------|--------|--------|
| 5     |               | -0.075 | -0.696 | 0.547  |
|       | Sub-total     |        |        |        |
|       | D+L pooled ES | -0.082 | -0.227 | 0.064  |
| ----- |               |        |        |        |
|       | K - A         |        |        |        |
| 6     |               | -0.408 | -0.618 | -0.197 |
| 39    |               | -0.775 | -0.989 | -0.561 |
|       | Sub-total     |        |        |        |
|       | D+L pooled ES | -0.591 | -0.951 | -0.231 |
| ----- |               |        |        |        |
|       | O - A         |        |        |        |
| 6     |               | -0.215 | -0.424 | -0.005 |
|       | Sub-total     |        |        |        |
|       | D+L pooled ES | -0.215 | -0.424 | -0.005 |
| ----- |               |        |        |        |
|       | O - K         |        |        |        |
| 6     |               | 0.193  | 0.022  | 0.363  |
| 7     |               | -0.033 | -0.217 | 0.151  |
|       | Sub-total     |        |        |        |
|       | D+L pooled ES | 0.082  | -0.139 | 0.304  |
| ----- |               |        |        |        |
|       | I - A         |        |        |        |
| 8     |               | -0.489 | -0.672 | -0.306 |
|       | Sub-total     |        |        |        |
|       | D+L pooled ES | -0.489 | -0.672 | -0.306 |
| ----- |               |        |        |        |
|       | P - A         |        |        |        |
| 8     |               | -0.665 | -0.863 | -0.466 |
|       | Sub-total     |        |        |        |
|       | D+L pooled ES | -0.665 | -0.863 | -0.466 |
| ----- |               |        |        |        |
|       | P - I         |        |        |        |
| 8     |               | -0.175 | -0.311 | -0.040 |
| 9     |               | -0.016 | -0.265 | 0.232  |
|       | Sub-total     |        |        |        |
|       | D+L pooled ES | -0.131 | -0.271 | 0.008  |
| ----- |               |        |        |        |
|       | N - D         |        |        |        |
| 10    |               | -0.059 | -0.895 | 0.776  |
|       | Sub-total     |        |        |        |
|       | D+L pooled ES | -0.059 | -0.895 | 0.776  |
| ----- |               |        |        |        |
|       | R - D         |        |        |        |
| 16    |               | -0.653 | -1.576 | 0.270  |
|       | Sub-total     |        |        |        |
|       | D+L pooled ES | -0.653 | -1.576 | 0.270  |
| ----- |               |        |        |        |
|       | R - J         |        |        |        |
| 17    |               | 0.623  | 0.466  | 0.781  |
|       | Sub-total     |        |        |        |
|       | D+L pooled ES | 0.623  | 0.466  | 0.781  |
| ----- |               |        |        |        |
|       | O - J         |        |        |        |
| 18    |               | 0.007  | -0.203 | 0.217  |
|       | Sub-total     |        |        |        |
|       | D+L pooled ES | 0.007  | -0.203 | 0.217  |
| ----- |               |        |        |        |
|       | F - C         |        |        |        |
| 20    |               | -0.710 | -1.369 | -0.050 |
|       | Sub-total     |        |        |        |
|       | D+L pooled ES | -0.710 | -1.369 | -0.050 |
| ----- |               |        |        |        |
|       | L - K         |        |        |        |
| 23    |               | 0.357  | 0.116  | 0.598  |
| 24    |               | 0.429  | 0.034  | 0.824  |
|       | Sub-total     |        |        |        |
|       | D+L pooled ES | 0.376  | 0.171  | 0.582  |
| ----- |               |        |        |        |
|       | D - C         |        |        |        |
| 26    |               | -0.318 | -1.016 | 0.380  |
|       | Sub-total     |        |        |        |
|       | D+L pooled ES | -0.318 | -1.016 | 0.380  |
| ----- |               |        |        |        |
|       | L - A         |        |        |        |
| 28    |               | -0.590 | -0.789 | -0.392 |
| 54    |               | -0.418 | -0.635 | -0.201 |
|       | Sub-total     |        |        |        |
|       | D+L pooled ES | -0.510 | -0.679 | -0.342 |

|       |               |        |        |
|-------|---------------|--------|--------|
| ----- |               |        |        |
|       | J - A         |        |        |
| 29    |               | -0.591 | -0.831 |
|       | Sub-total     |        | -0.351 |
|       | D+L pooled ES | -0.591 | -0.831 |
| ----- |               |        |        |
|       | G - A         |        |        |
| 30    |               | -1.179 | -2.419 |
|       | Sub-total     |        | 0.060  |
|       | D+L pooled ES | -1.179 | -2.419 |
| ----- |               |        |        |
|       | D - A         |        |        |
| 31    |               | -1.500 | -2.295 |
|       | Sub-total     |        | -0.704 |
|       | D+L pooled ES | -1.500 | -2.295 |
| ----- |               |        |        |
|       | S - L         |        |        |
| 32    |               | -0.090 | -0.576 |
|       | Sub-total     |        | 0.397  |
|       | D+L pooled ES | -0.090 | -0.576 |
| ----- |               |        |        |
|       | M - A         |        |        |
| 34    |               | -0.619 | -0.850 |
|       | Sub-total     |        | -0.387 |
|       | D+L pooled ES | -0.619 | -0.850 |
| ----- |               |        |        |
|       | B - A         |        |        |
| 35    |               | -0.742 | -1.772 |
|       | Sub-total     |        | 0.289  |
|       | D+L pooled ES | -0.742 | -1.772 |
| ----- |               |        |        |
|       | L - J         |        |        |
| 42    |               | 0.471  | -0.401 |
|       | Sub-total     |        | 1.342  |
|       | D+L pooled ES | 0.471  | -0.401 |
| ----- |               |        |        |
|       | D - B         |        |        |
| 46    |               | -0.128 | -0.677 |
| 55    |               | 0.704  | -0.095 |
| 72    |               | -0.458 | -1.185 |
|       | Sub-total     |        | 0.422  |
|       | D+L pooled ES | 0.008  | -0.598 |
| ----- |               |        |        |
|       | P - J         |        |        |
| 48    |               | 0.212  | -0.410 |
|       | Sub-total     |        | 0.834  |
|       | D+L pooled ES | 0.212  | -0.410 |
| ----- |               |        |        |
|       | L - D         |        |        |
| 49    |               | -0.047 | -0.319 |
|       | Sub-total     |        | 0.224  |
|       | D+L pooled ES | -0.047 | -0.319 |
| ----- |               |        |        |
|       | F - D         |        |        |
| 50    |               | -0.314 | -0.964 |
|       | Sub-total     |        | 0.335  |
|       | D+L pooled ES | -0.314 | -0.964 |
| ----- |               |        |        |
|       | F - B         |        |        |
| 51    |               | -2.458 | -3.147 |
| 53    |               | -0.166 | -0.575 |
| 64    |               | 0.474  | -0.048 |
| 68    |               | 0.423  | -0.279 |
| 71    |               | -0.821 | -1.576 |
| 73    |               | 0.621  | -0.192 |
| 75    |               | -0.103 | -0.819 |
|       | Sub-total     |        | 0.613  |
|       | D+L pooled ES | -0.287 | -1.020 |
| ----- |               |        |        |
|       | G - B         |        |        |
| 56    |               | 0.031  | -0.754 |
|       | Sub-total     |        | 0.816  |
|       | D+L pooled ES | 0.031  | -0.754 |
| ----- |               |        |        |
|       | G - D         |        |        |
| 57    |               | -0.145 | -1.376 |
|       | Sub-total     |        | 1.086  |
|       | D+L pooled ES | -0.145 | -1.376 |

|               |  |        |               |
|---------------|--|--------|---------------|
| -----         |  |        |               |
| M - L         |  |        |               |
| 59            |  | 0.066  | -0.059 0.191  |
| Sub-total     |  |        |               |
| D+L pooled ES |  | 0.066  | -0.059 0.191  |
| -----         |  |        |               |
| C - B         |  |        |               |
| 62            |  | 0.174  | -0.426 0.773  |
| 66            |  | -0.444 | -0.978 0.090  |
| 78            |  | 0.031  | -0.605 0.668  |
| Sub-total     |  |        |               |
| D+L pooled ES |  | -0.106 | -0.489 0.277  |
| -----         |  |        |               |
| E - D         |  |        |               |
| 63            |  | 0.102  | -0.434 0.638  |
| Sub-total     |  |        |               |
| D+L pooled ES |  | 0.102  | -0.434 0.638  |
| -----         |  |        |               |
| E - C         |  |        |               |
| 65            |  | -0.142 | -0.699 0.415  |
| Sub-total     |  |        |               |
| D+L pooled ES |  | -0.142 | -0.699 0.415  |
| -----         |  |        |               |
| H - C         |  |        |               |
| 69            |  | -0.767 | -1.489 -0.045 |
| Sub-total     |  |        |               |
| D+L pooled ES |  | -0.767 | -1.489 -0.045 |
| -----         |  |        |               |
| E - B         |  |        |               |
| 77            |  | -0.094 | -0.732 0.543  |
| Sub-total     |  |        |               |
| D+L pooled ES |  | -0.094 | -0.732 0.543  |
| -----         |  |        |               |

Test(s) of heterogeneity:

|       | Heterogeneity<br>statistic | degrees of<br>freedom | P     | I-squared** | Tau-squared |
|-------|----------------------------|-----------------------|-------|-------------|-------------|
| Q - J | 0.43                       | 3                     | 0.933 | 0.0%        | 0.0000      |
| K - A | 5.74                       | 1                     | 0.017 | 82.6%       | 0.0557      |
| O - A | 0.00                       | 0                     | .     | .%          | 0.0000      |
| O - K | 3.11                       | 1                     | 0.078 | 67.8%       | 0.0173      |
| I - A | 0.00                       | 0                     | .     | .%          | 0.0000      |
| P - A | 0.00                       | 0                     | .     | .%          | 0.0000      |
| P - I | 1.21                       | 1                     | 0.271 | 17.5%       | 0.0022      |
| N - D | 0.00                       | 0                     | .     | .%          | 0.0000      |
| R - D | 0.00                       | 0                     | .     | .%          | 0.0000      |
| R - J | 0.00                       | 0                     | .     | .%          | 0.0000      |
| O - J | 0.00                       | 0                     | .     | .%          | 0.0000      |
| F - C | 0.00                       | 0                     | .     | .%          | 0.0000      |
| L - K | 0.09                       | 1                     | 0.761 | 0.0%        | 0.0000      |
| D - C | 0.00                       | 0                     | .     | .%          | 0.0000      |
| L - A | 1.32                       | 1                     | 0.250 | 24.3%       | 0.0036      |
| J - A | 0.00                       | 0                     | .     | .%          | 0.0000      |
| G - A | 0.00                       | 0                     | .     | .%          | 0.0000      |
| D - A | 0.00                       | 0                     | .     | .%          | 0.0000      |
| S - L | 0.00                       | 0                     | .     | .%          | 0.0000      |
| M - A | 0.00                       | 0                     | .     | .%          | 0.0000      |
| B - A | 0.00                       | 0                     | .     | .%          | 0.0000      |
| L - J | 0.00                       | 0                     | .     | .%          | 0.0000      |
| D - B | 4.70                       | 2                     | 0.095 | 57.4%       | 0.1649      |
| P - J | 0.00                       | 0                     | .     | .%          | 0.0000      |
| L - D | 0.00                       | 0                     | .     | .%          | 0.0000      |
| F - D | 0.00                       | 0                     | .     | .%          | 0.0000      |
| F - B | 57.28                      | 6                     | 0.000 | 89.5%       | 0.8631      |
| G - B | 0.00                       | 0                     | .     | .%          | 0.0000      |
| G - D | 0.00                       | 0                     | .     | .%          | 0.0000      |
| M - L | 0.00                       | 0                     | .     | .%          | 0.0000      |
| C - B | 2.55                       | 2                     | 0.279 | 21.6%       | 0.0248      |
| E - D | 0.00                       | 0                     | .     | .%          | 0.0000      |
| E - C | 0.00                       | 0                     | .     | .%          | 0.0000      |
| H - C | 0.00                       | 0                     | .     | .%          | 0.0000      |
| E - B | 0.00                       | 0                     | .     | .%          | 0.0000      |

\*\* I-squared: the variation in ES attributable to heterogeneity)

Net league table

|                     |                    |                   |                     |                     |                    |                     |                    |                     |                     |                     |                    |                   |                   |                     |                     |                     |                   |                   |
|---------------------|--------------------|-------------------|---------------------|---------------------|--------------------|---------------------|--------------------|---------------------|---------------------|---------------------|--------------------|-------------------|-------------------|---------------------|---------------------|---------------------|-------------------|-------------------|
| Aripiprazole_LAI    | -0.08 (-1.00,0.84) | 0.17 (-0.61,0.95) | 0.09 (-0.61,0.79)   | 0.07 (-0.57,0.7)    | 0.21 (-0.55,0.98)  | 0.24 (-0.18,0.67)   | 0.22 (-0.44,0.87)  | -0.60 (-1.89,0.70)  | -0.23 (-0.99,0.53)  | -0.08 (-0.64,0.47)  | 0.07 (-0.79,0.92)  | 0.74 (0.33,1.15)  | 0.01 (-1.28,1.26) | 0.11 (-0.36,0.58)   | 0.12 (-0.59,0.82)   | -0.18 (-0.89,0.53)  | 0.21 (-0.61,1.04) | 0.15 (-0.83,1.14) |
| 0.08 (-0.84,1.0)    | Bromperidol_LAI    | 0.25 (-0.61,1.1)  | 0.17 (-0.61,0.95)   | 0.15 (-0.64,0.9)    | 0.29 (-0.77,1.36)  | 0.32 (-0.56,1.20)   | 0.30 (-0.71,1.30)  | -0.52 (-1.87,0.83)  | -0.15 (-0.98,0.6)   | -0.00 (-0.94,0.9)   | 0.15 (-0.79,1.09)  | 0.82 (-0.03,1.67) | 0.09 (-1.28,1.45) | 0.19 (-0.78,1.15)   | 0.20 (-0.83,1.2)    | -0.10 (-1.14,0.9)   | 0.29 (-0.77,1.36) | 0.23 (-1.01,1.48) |
| -0.17 (-0.95,0.61)  | -0.25 (-1.11,0.61) | Flupenthixol_LAI  | -0.08 (-0.50,0.34)  | -0.10 (-0.61,0.4)   | 0.05 (-0.91,1.0)   | 0.07 (-0.65,0.80)   | 0.05 (-0.83,0.92)  | -0.77 (-1.80,0.27)  | -0.40 (-0.89,0.0)   | -0.25 (-1.05,0.5)   | -0.10 (-0.71,0.51) | 0.57 (-0.14,1.27) | -0.16 (-1.39,1.0) | -0.06 (-0.89,0.7)   | -0.05 (-0.96,0.8)   | -0.35 (-1.26,0.5)   | 0.04 (-0.88,0.9)  | -0.01 (-1.16,1.1) |
| -0.09 (-0.79,0.61)  | -0.17 (-0.95,0.61) | 0.08 (-0.34,0.5)  | Fluphenazine_LAI    | -0.02 (-0.43,0.38)  | 0.12 (-0.77,1.0)   | 0.15 (-0.49,0.79)   | 0.13 (-0.68,0.94)  | -0.69 (-1.81,0.43)  | -0.32 (-0.66,0.0)   | -0.17 (-0.90,0.5)   | -0.02 (-0.61,0.56) | 0.65 (0.03,1.27)  | -0.08 (-1.27,1.1) | 0.02 (-0.74,0.7)    | 0.03 (-0.82,0.8)    | -0.27 (-1.12,0.5)   | 0.12 (-0.74,0.9)  | 0.06 (-1.03,1.1)  |
| -0.07 (-0.70,0.57)  | -0.15 (-0.93,0.64) | 0.10 (-0.41,0.61) | 0.02 (-0.38,0.43)   | Haloperidol_LAI     | 0.15 (-0.69,0.9)   | 0.18 (-0.38,0.73)   | 0.15 (-0.60,0.90)  | -0.67 (-1.82,0.49)  | -0.30 (-0.78,0.1)   | -0.15 (-0.80,0.5)   | -0.00 (-0.60,0.60) | 0.67 (0.12,1.22)  | -0.06 (-1.18,1.0) | 0.04 (-0.66,0.4)    | 0.05 (-0.74,0.8)    | -0.25 (-1.03,0.5)   | 0.15 (-0.65,0.9)  | 0.09 (-0.96,1.1)  |
| -0.21 (-0.98,0.55)  | -0.29 (-1.36,0.77) | -0.05 (-1.00,0.9) | -0.12 (-1.02,0.77)  | -0.15 (-0.99,0.6)   | Olanzapine_LAI     | 0.03 (-0.71,0.77)   | 0.00 (-0.87,0.87)  | -0.81 (-2.22,0.60)  | -0.44 (-1.38,0.4)   | -0.30 (-1.04,0.4)   | -0.15 (-1.16,0.87) | 0.52 (-0.14,1.18) | -0.21 (-1.61,1.1) | -0.10 (-0.91,0.7)   | -0.10 (-0.63,0.4)   | -0.40 (-1.25,0.4)   | -0.00 (-0.97,0.9) | -0.06 (-1.22,1.1) |
| -0.24 (-0.67,0.18)  | -0.32 (-1.20,0.56) | -0.07 (-0.80,0.6) | -0.15 (-0.79,0.49)  | -0.18 (-0.73,0.3)   | Paliperidone_LAI_1 | -0.03 (-0.60,0.54)  | -0.03 (-0.60,0.54) | -0.84 (-2.10,0.42)  | -0.47 (-1.17,0.2)   | -0.33 (-0.86,0.2)   | -0.18 (-0.98,0.62) | 0.49 (0.12,1.27)  | -0.24 (-1.48,1.0) | -0.13 (-0.68,0.4)   | -0.13 (-0.81,0.5)   | -0.43 (-1.11,0.2)   | -0.03 (-0.83,0.7) | -0.09 (-0.98,0.8) |
| -0.22 (-0.87,0.44)  | -0.30 (-1.30,0.7)  | -0.05 (-0.92,0.8) | -0.13 (-0.94,0.68)  | -0.15 (-0.90,0.6)   | -0.00 (-0.87,0.8)  | 0.03 (-0.54,0.60)   | Paliperidone_LAI_3 | -0.82 (-2.17,0.54)  | -0.45 (-1.30,0.4)   | -0.30 (-1.02,0.4)   | -0.15 (-1.09,0.79) | 0.52 (-0.05,1.09) | -0.21 (-1.55,1.1) | -0.11 (-0.84,0.6)   | -0.10 (-0.92,0.7)   | -0.40 (-1.24,0.4)   | -0.00 (-0.94,0.9) | -0.06 (-1.12,0.9) |
| 0.60 (-0.70,1.89)   | 0.52 (-0.83,1.8)   | 0.77 (-0.27,1.8)  | 0.69 (-0.43,1.81)   | 0.67 (-0.49,1.8)    | 0.81 (-0.60,2.2)   | 0.84 (-0.42,2.10)   | 0.82 (-0.54,2.17)  | Perphenazine_LAI    | 0.37 (-0.78,1.5)    | 0.52 (-0.79,1.8)    | 0.67 (-0.54,1.87)  | 1.34 (0.08,2.59)  | 0.61 (-1.00,2.2)  | 0.71 (-0.62,2.0)    | 0.72 (-0.66,2.0)    | 0.42 (-0.96,1.7)    | 0.81 (-0.58,2.2)  | 0.75 (-0.79,2.2)  |
| 0.23 (-0.53,0.9)    | 0.15 (-0.69,0.9)   | 0.40 (-0.09,0.8)  | 0.32 (-0.02,0.66)   | 0.30 (-0.18,0.7)    | 0.44 (-0.49,1.3)   | 0.47 (-0.23,1.17)   | 0.45 (-0.41,1.30)  | Pipothiazine_LAI    | -0.37 (-1.52,0.78)  | 0.15 (-0.63,0.9)    | 0.30 (-0.36,0.95)  | 0.97 (0.29,1.65)  | 0.24 (-0.98,1.4)  | 0.34 (-0.47,1.1)    | 0.35 (-0.54,1.2)    | 0.05 (-0.84,0.9)    | 0.44 (-0.46,1.3)  | 0.38 (-0.75,1.5)  |
| 0.08 (-0.47,0.64)   | 0.00 (-0.94,0.9)   | 0.25 (-0.55,1.0)  | 0.17 (-0.55,0.90)   | 0.15 (-0.50,0.8)    | 0.30 (-0.44,1.0)   | 0.33 (-0.21,0.86)   | 0.30 (-0.42,1.02)  | -0.52 (-1.82,0.79)  | -0.15 (-0.92,0.6)   | Risperidone_LAI     | 0.15 (-0.72,1.02)  | 0.82 (0.34,1.30)  | 0.09 (-1.20,1.3)  | 0.19 (-0.36,0.7)    | 0.20 (-0.45,0.8)    | -0.10 (-0.53,0.3)   | 0.30 (-0.38,0.9)  | 0.24 (-0.80,1.2)  |
| -0.07 (-0.92,0.79)  | -0.15 (-1.09,0.7)  | 0.10 (-0.51,0.7)  | 0.02 (-0.56,0.61)   | 0.00 (-0.60,0.6)    | 0.15 (-0.87,1.1)   | 0.18 (-0.62,0.98)   | 0.15 (-0.79,1.09)  | -0.67 (-1.87,0.54)  | -0.30 (-0.95,0.3)   | -0.15 (-1.02,0.7)   | (Zuclopinex)_LAI   | 0.67 (-0.12,1.46) | -0.06 (-1.33,1.2) | 0.04 (-0.86,0.9)    | 0.05 (-0.92,1.0)    | -0.25 (-1.22,0.7)   | 0.15 (-0.84,1.1)  | 0.09 (-1.11,1.2)  |
| -0.74 (-1.15,-0.33) | -0.82 (-1.67,0.3)  | -0.57 (-1.27,0.1) | -0.65 (-1.27,-0.03) | -0.67 (-1.22,-0.12) | -0.52 (-1.18,0.1)  | -0.49 (-0.86,-0.12) | -0.52 (-1.09,0.05) | -1.34 (-2.59,-0.08) | -0.97 (-1.65,-0.29) | -0.82 (-1.30,-0.34) | -0.67 (-1.46,0.12) | Placebo           | -0.73 (-1.97,0.5) | -0.63 (-1.13,-0.12) | -0.62 (-1.22,-0.02) | -0.92 (-1.57,-0.27) | -0.52 (-1.30,0.2) | -0.58 (-1.54,0.3) |
| -0.01 (-1.29,1.28)  | -0.09 (-1.45,1.2)  | 0.16 (-1.07,1.3)  | 0.08 (-1.11,1.27)   | 0.06 (-1.06,1.1)    | 0.21 (-1.19,1.6)   | 0.24 (-1.01,1.48)   | 0.21 (-1.14,1.55)  | -0.61 (-2.21,1.00)  | -0.24 (-1.45,0.9)   | -0.09 (-1.39,1.2)   | 0.06 (-1.21,1.33)  | Haloperidol_OS    | 0.10 (-1.22,1.4)  | 0.11 (-1.26,1.4)    | -0.19 (-1.55,1.1)   | 0.21 (-1.17,1.5)    | 0.15 (-1.38,1.6)  |                   |
| -0.11 (-0.58,0.36)  | -0.19 (-1.15,0.7)  | 0.06 (-0.77,0.8)  | -0.02 (-0.78,0.74)  | -0.04 (-0.74,0.6)   | 0.10 (-0.70,0.9)   | 0.13 (-0.42,0.68)   | 0.11 (-0.62,0.84)  | -0.71 (-2.04,0.62)  | -0.34 (-1.15,0.4)   | -0.19 (-0.74,0.3)   | -0.04 (-0.94,0.86) | 0.63 (0.12,1.13)  | -0.10 (-1.42,1.2) | 0.01 (-0.73,0.7)    | -0.29 (-0.99,0.4)   | 0.10 (-0.73,0.9)    | 0.04 (-1.00,1.0)  |                   |
| -0.12 (-0.82,0.59)  | -0.20 (-1.23,0.8)  | 0.05 (-0.86,0.9)  | -0.03 (-0.87,0.82)  | -0.05 (-0.84,0.7)   | 0.10 (-0.43,0.6)   | 0.13 (-0.56,0.81)   | 0.10 (-0.72,0.92)  | -0.72 (-2.09,0.66)  | -0.35 (-1.24,0.5)   | -0.20 (-0.86,0.4)   | -0.05 (-1.02,0.92) | 0.62 (0.02,1.22)  | -0.11 (-1.48,1.2) | -0.01 (-0.75,0.7)   | Olanzapine_OS       | -0.30 (-1.08,0.4)   | 0.10 (-0.81,1.0)  | 0.04 (-1.09,1.1)  |
| 0.18 (-0.52,0.8)    | 0.10 (-0.93,1.1)   | 0.35 (-0.56,1.2)  | 0.27 (-0.57,1.12)   | 0.25 (-0.54,1.0)    | 0.40 (-0.46,1.2)   | 0.43 (-0.26,1.11)   | 0.40 (-0.44,1.24)  | -0.42 (-1.79,0.96)  | -0.05 (-0.94,0.8)   | 0.10 (-0.33,0.5)    | 0.25 (-0.72,1.22)  | 0.92 (0.27,1.57)  | 0.19 (-1.18,1.5)  | 0.29 (-0.41,0.9)    | 0.30 (-0.49,1.0)    | Risperidone_OS      | 0.39 (-0.41,1.2)  | 0.34 (-0.79,1.4)  |
| -0.21 (-1.04,0.61)  | -0.29 (-1.36,0.77) | -0.04 (-0.97,0.8) | -0.12 (-0.99,0.74)  | -0.15 (-0.94,0.6)   | 0.00 (-0.97,0.9)   | 0.03 (-0.77,0.83)   | 0.00 (-0.93,0.94)  | -0.81 (-2.20,0.58)  | -0.44 (-1.35,0.4)   | -0.30 (-0.97,0.3)   | -0.15 (-1.13,0.84) | 0.52 (-0.25,1.30) | -0.21 (-1.58,1.1) | -0.10 (-0.94,0.7)   | -0.10 (-1.01,0.8)   | -0.39 (-1.20,0.4)   | Quetiapine_OS     | -0.06 (-1.25,1.1) |
| -0.15 (-1.14,0.83)  | -0.23 (-1.48,1.0)  | 0.01 (-1.13,1.1)  | -0.06 (-1.16,1.03)  | -0.09 (-1.13,0.9)   | 0.06 (-1.10,1.2)   | 0.09 (-0.80,0.98)   | 0.06 (-0.99,1.12)  | -0.75 (-2.29,0.79)  | -0.38 (-1.51,0.7)   | -0.24 (-1.27,0.8)   | -0.09 (-1.28,1.11) | 0.58 (-0.38,1.54) | -0.15 (-1.68,1.3) | -0.04 (-1.09,1.0)   | -0.04 (-1.16,1.0)   | -0.34 (-1.46,0.7)   | 0.06 (-1.13,1.2)  | Paliperidone_OS   |

Net league table: head-to-head comparisons. Standardized mean differences (SMDs) and 95% confidence intervals (CIs) are reported. SMDs lower than 0 favour the column-defining treatment. Statistically significant results are highlighted in grey. LAI=long-acting antipsychotics

### Evaluation of heterogeneity and incoherence

#### Overall heterogeneity

Estimated between-studies SD: .37822918

#### Overall incoherence

Design-by-treatment test: P = 0.000

#### Loop-specific approach

\* 19 triangular loops found

\* 3 quadratic loops found

Note: Heterogeneity of loop A-B-G cannot be estimated due to insufficient observations - set equal to 0

Note: Heterogeneity of loop A-D-G cannot be estimated due to insufficient observations - set equal to 0

Note: Heterogeneity of loop A-D-L cannot be estimated due to insufficient observations - set equal to 0

Note: Heterogeneity of loop A-I-P cannot be estimated due to insufficient observations - set equal to 0

Note: Heterogeneity of loop A-J-L cannot be estimated due to insufficient observations - set equal to 0

Note: Heterogeneity of loop A-J-O cannot be estimated due to insufficient observations - set equal to 0

Note: Heterogeneity of loop A-J-P cannot be estimated due to insufficient observations - set equal to 0

Note: Heterogeneity of loop A-K-O cannot be estimated due to insufficient observations - set equal to 0

Note: Heterogeneity of loop A-L-M cannot be estimated due to insufficient observations - set equal to 0



Note: Heterogeneity of loop C-D-E cannot be estimated due to insufficient observations - set equal to 0  
 Note: Heterogeneity of loop C-D-F cannot be estimated due to insufficient observations - set equal to 0  
 Note: Heterogeneity of loop A-D-J-R cannot be estimated due to insufficient observations - set equal to 0  
 Note: Heterogeneity of loop D-J-L-R cannot be estimated due to insufficient observations - set equal to 0

Evaluation of inconsistency using loop-specific heterogeneity estimates:

| Loop    | IF    | seIF  | z_value | p_value | CI_95       | Loop_Heterog_tau2 |
|---------|-------|-------|---------|---------|-------------|-------------------|
| A-D-J-R | 2.185 | 0.639 | 3.420   | 0.001   | (0.93,3.44) | 0.000             |
| A-D-L   | 1.035 | 0.435 | 2.377   | 0.017   | (0.18,1.89) | 0.000             |
| A-B-D   | 0.767 | 0.989 | 0.775   | 0.438   | (0.00,2.71) | 0.165             |
| D-J-L-R | 0.758 | 0.667 | 1.136   | 0.256   | (0.00,2.07) | 0.000             |
| B-C-F   | 0.507 | 1.138 | 0.445   | 0.656   | (0.00,2.74) | 0.635             |
| A-B-G   | 0.469 | 0.915 | 0.513   | 0.608   | (0.00,2.26) | 0.000             |
| A-D-G   | 0.465 | 0.979 | 0.475   | 0.635   | (0.00,2.39) | 0.000             |
| B-C-D   | 0.412 | 0.601 | 0.685   | 0.493   | (0.00,1.59) | 0.084             |
| A-K-O   | 0.406 | 0.162 | 2.516   | 0.012   | (0.09,0.72) | 0.000             |
| A-J-L   | 0.392 | 0.467 | 0.838   | 0.402   | (0.00,1.31) | 0.000             |
| A-J-O   | 0.369 | 0.195 | 1.898   | 0.058   | (0.00,0.75) | 0.000             |
| A-K-L   | 0.300 | 0.231 | 1.299   | 0.194   | (0.00,0.75) | 0.020             |
| A-J-P   | 0.286 | 0.355 | 0.806   | 0.420   | (0.00,0.98) | 0.000             |
| B-D-E   | 0.205 | 0.827 | 0.247   | 0.805   | (0.00,1.83) | 0.165             |
| A-L-M   | 0.173 | 0.154 | 1.124   | 0.261   | (0.00,0.47) | 0.000             |
| J-K-L-O | 0.168 | 0.498 | 0.337   | 0.736   | (0.00,1.14) | 0.008             |
| B-D-G   | 0.168 | 1.052 | 0.159   | 0.873   | (0.00,2.23) | 0.165             |
| A-I-P   | 0.159 | 0.187 | 0.849   | 0.396   | (0.00,0.53) | 0.000             |
| B-C-E   | 0.154 | 0.524 | 0.294   | 0.769   | (0.00,1.18) | 0.025             |
| C-D-F   | 0.077 | 0.592 | 0.131   | 0.896   | (0.00,1.24) | 0.000             |
| C-D-E   | 0.074 | 0.531 | 0.139   | 0.890   | (0.00,1.12) | 0.000             |
| B-D-F   | 0.001 | 1.180 | 0.000   | 1.000   | (0.00,2.31) | 0.712             |

Consistency between direct and indirect estimates

| Side  | Direct    |           | Indirect  |           | Difference |           |       |
|-------|-----------|-----------|-----------|-----------|------------|-----------|-------|
|       | Coef.     | Std. Err. | Coef.     | Std. Err. | Coef.      | Std. Err. | P> z  |
| A B   | -.7416405 | .6517231  | -.6219449 | .3654691  | -.1196956  | .7472018  | 0.873 |
| A D   | -1.49975  | .5375759  | -.3893912 | .3056121  | -1.110359  | .6183741  | 0.073 |
| A G   | -1.179461 | .737993   | -.6283713 | .5360362  | -.5510899  | .9121231  | 0.546 |
| A I   | -.4881301 | .4049228  | -.6286382 | .6905497  | .1405081   | .7993941  | 0.860 |
| A J   | -.5909712 | .4089824  | -.962875  | .3169948  | .3719038   | .5174479  | 0.472 |
| A K   | -.593085  | .2846897  | -.9270032 | .3257628  | .3339182   | .4325041  | 0.440 |
| A L   | -.5047573 | .2891026  | -.486448  | .2664598  | -.0183094  | .3931748  | 0.963 |
| A M   | -.6187709 | .4108865  | -.4038599 | .4495623  | -.214911   | .6090435  | 0.724 |
| A O   | -.2165848 | .3806163  | -.9298215 | .329006   | .7132367   | .5035858  | 0.157 |
| A P   | -.6654416 | .4052782  | -.5519354 | .5073328  | -.1135062  | .6480028  | 0.861 |
| B C   | -.0920061 | .2789841  | .3286903  | .3369416  | -.4206965  | .4374542  | 0.336 |
| B D   | .0069844  | .3021091  | -.049663  | .2915028  | .0566474   | .4198523  | 0.893 |
| B E   | -.0943804 | .5074569  | .0179646  | .381549   | -.112345   | .6348951  | 0.860 |
| B F   | -.2734243 | .1920392  | -.5242032 | .404232   | .2507789   | .447604   | 0.575 |
| B G   | .0310409  | .5538888  | -.3851768 | .5738509  | .4162177   | .7975569  | 0.602 |
| C D   | -.3179079 | .5255433  | -.0295177 | .3041799  | -.2883902  | .6072242  | 0.635 |
| C E   | -.1423692 | .4827413  | -.0717259 | .4211016  | -.0706433  | .6405981  | 0.912 |
| C F   | -.7096051 | .5097608  | -.2971002 | .2917096  | -.4125049  | .5873249  | 0.482 |
| C H * | -.7672012 | .5280712  | 1.137032  | 63.2588   | -1.904233  | 63.26101  | 0.976 |
| D E   | .1017868  | .475937   | -.0790185 | .4180222  | .1808053   | .6334505  | 0.775 |
| D F   | -.3143905 | .5111116  | -.2921821 | .2861443  | -.0222084  | .5857589  | 0.970 |
| D G   | -.1451703 | .7364229  | -.1482349 | .4811301  | .0030647   | .8796569  | 0.997 |
| D L   | -.0474416 | .4100864  | .3935265  | .3998614  | -.4409681  | .5727652  | 0.441 |
| D N * | -.0594824 | .5700721  | 1.340333  | 63.25111  | -1.399815  | 63.25368  | 0.982 |
| D R   | -.6527192 | .5911701  | .7794087  | .5161368  | -1.432128  | .7847826  | 0.068 |
| I P * | -.0986623 | .28645    | -.0674085 | 1.347373  | -.0312538  | 1.378118  | 0.982 |
| J L   | .4706428  | .5893573  | .2886749  | .3150021  | .1819679   | .6682579  | 0.785 |
| J O   | .0068665  | .4047261  | .3876993  | .410227   | -.3808328  | .576272   | 0.509 |
| J P   | .1222136  | .5044852  | .1967575  | .469409   | .0154562   | .6890937  | 0.982 |
| J Q * | -.0988257 | .2202362  | 1.644478  | 31.62913  | -1.743304  | 31.62992  | 0.956 |
| J R   | .6233261  | .366142   | -.8081683 | .6940475  | 1.431494   | .7847049  | 0.068 |
| K L   | .390268   | .2964953  | .0605086  | .3310499  | .3297594   | .4444126  | 0.458 |
| K O   | .0802694  | .2857984  | .2037936  | .524094   | -.1235242  | .5969704  | 0.836 |
| L M   | .0658622  | .3986501  | -.1489608 | .4604616  | .2148231   | .609054   | 0.724 |
| L S * | -.0898042 | .4524158  | .9858737  | 63.24383  | -1.075678  | 63.24543  | 0.986 |

\* Warning: all the evidence about these contrasts comes from the trials which directly compare them.

Funnel plot

Not applicable: no comparisons with 10 or more studies.

## Supplement S - Secondary outcome: quality of life measured as mean change at the end of the study

### Treatment codes

|                    |   |
|--------------------|---|
| Aripiprazole LAI   | A |
| Risperidone LAI    | B |
| Paliperidone LAI-1 | C |
| Aripiprazole OS    | D |
| Risperidone OS     | E |
| Paliperidone OS    | F |

### Network map

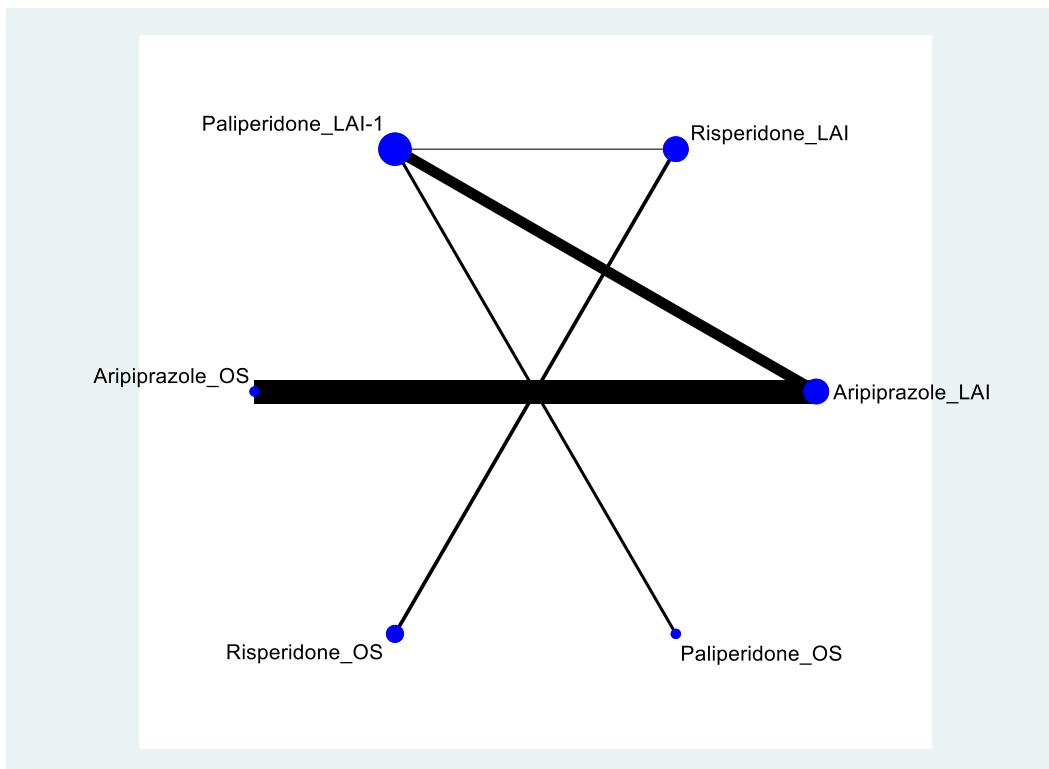

### Pairwise meta-analysis

| Study         | ES     | [95% Conf. Interval] |        |
|---------------|--------|----------------------|--------|
| -----         |        |                      |        |
| E - B         |        |                      |        |
| 2             | 0.000  | -0.554               | 0.554  |
| 5             | -0.549 | -1.365               | 0.268  |
| Sub-total     |        |                      |        |
| D+L pooled ES | -0.189 | -0.700               | 0.322  |
| -----         |        |                      |        |
| D - A         |        |                      |        |
| 7             | -0.048 | -0.232               | 0.136  |
| Sub-total     |        |                      |        |
| D+L pooled ES | -0.048 | -0.232               | 0.136  |
| -----         |        |                      |        |
| C - A         |        |                      |        |
| 23            | -2.957 | -3.304               | -2.609 |
| 24            | -1.155 | -1.578               | -0.733 |
| Sub-total     |        |                      |        |
| D+L pooled ES | -2.060 | -3.826               | -0.295 |
| -----         |        |                      |        |
| F - C         |        |                      |        |
| 32            | 0.798  | 0.291                | 1.305  |

|               |  |       |        |       |
|---------------|--|-------|--------|-------|
| Sub-total     |  |       |        |       |
| D+L pooled ES |  | 0.798 | 0.291  | 1.305 |
| -----         |  |       |        |       |
| C - B         |  |       |        |       |
| 42            |  | 0.208 | -0.651 | 1.067 |
| Sub-total     |  |       |        |       |
| D+L pooled ES |  | 0.208 | -0.651 | 1.067 |
| -----         |  |       |        |       |

Test(s) of heterogeneity:

|       | Heterogeneity statistic | degrees of freedom | P     | I-squared** | Tau-squared |
|-------|-------------------------|--------------------|-------|-------------|-------------|
| E - B | 1.19                    | 1                  | 0.276 | 15.8%       | 0.0237      |
| D - A | 0.00                    | 0                  | .     | .%          | 0.0000      |
| C - A | 41.64                   | 1                  | 0.000 | 97.6%       | 1.5839      |
| F - C | 0.00                    | 0                  | .     | .%          | 0.0000      |
| C - B | 0.00                    | 0                  | .     | .%          | 0.0000      |

\*\* I-squared: the variation in ES attributable to heterogeneity)

### Net league table

|                    |                    |                    |                     |                    |                   |
|--------------------|--------------------|--------------------|---------------------|--------------------|-------------------|
| Risperidone_OS     | 0.26 (-1.12,1.64)  | 1.26 (-1.84,4.36)  | 0.46 (-1.99,2.91)   | 2.47 (-0.86,5.81)  | 2.52 (-0.26,5.30) |
| -0.26 (-1.64,1.12) | Risperidone_LAI    | 1.00 (-1.77,3.77)  | 0.20 (-1.82,2.22)   | 2.21 (-0.82,5.25)  | 2.26 (-0.15,4.67) |
| -1.26 (-4.36,1.84) | -1.00 (-3.77,1.77) | Paliperidone_OS    | -0.80 (-2.70,1.10)  | 1.21 (-1.74,4.17)  | 1.26 (-1.05,3.57) |
| -0.46 (-2.91,1.99) | -0.20 (-2.22,1.82) | 0.80 (-1.10,2.70)  | Paliperidone_LAI_1  | 2.01 (-0.25,4.28)  | 2.06 (0.74,3.38)  |
| -2.47 (-5.81,0.86) | -2.21 (-5.25,0.82) | -1.21 (-4.17,1.74) | -2.01 (-4.28,0.25)  | Aripiprazole_OS    | 0.05 (-1.79,1.89) |
| -2.52 (-5.30,0.26) | -2.26 (-4.67,0.15) | -1.26 (-3.57,1.05) | -2.06 (-3.38,-0.74) | -0.05 (-1.89,1.79) | Aripiprazole_LAI  |

Net league table: head-to-head comparisons. Standardized mean differences (SMDs) and 95% confidence intervals (CIs) are reported. SMDs lower than 0 favour the column-defining treatment. Statistically significant results are highlighted in grey. LAI=long-acting antipsychotics

### Evaluation of heterogeneity and incoherence

Overall heterogeneity

Estimated between-studies SD = .93531018

Overall incoherence

Design-by-treatment test: P = 0.000

Loop-specific approach

No triangular or quadratic loops found

Consistency between direct and indirect estimates

| Side  | Direct    |           | Indirect  |           | Difference |           |       |
|-------|-----------|-----------|-----------|-----------|------------|-----------|-------|
|       | Coef.     | Std. Err. | Coef.     | Std. Err. | Coef.      | Std. Err. | P> z  |
| A C * | -2.063373 | .6755618  | .11889    | 15.83145  | -2.182263  | 15.84586  | 0.890 |
| A D   | .         | .         | .         | .         | .          | .         | .     |
| B C * | .2079487  | 1.032501  | -2.446039 | 21.10501  | 2.653988   | 21.1303   | 0.900 |
| B E * | -.2614613 | .7065347  | 4.62032   | 44.80342  | -4.881781  | 44.80929  | 0.913 |
| C F * | .7979375  | .969212   | 4.132635  | 63.28106  | -3.334698  | 63.28847  | 0.958 |

\* Warning: all the evidence about these contrasts comes from the trials which directly compare them.

### Funnel plot

Not applicable: no comparisons with 10 or more studies.

## Supplement T - Secondary outcome: functioning measured as mean change at the end of the study

### Treatment codes

|                    |   |
|--------------------|---|
| Placebo            | A |
| Risperidone LAI    | B |
| Paliperidone LAI-1 | C |
| Paliperidone LAI-3 | D |
| Risperidone OS     | E |
| Paliperidone OS    | F |

### Network map

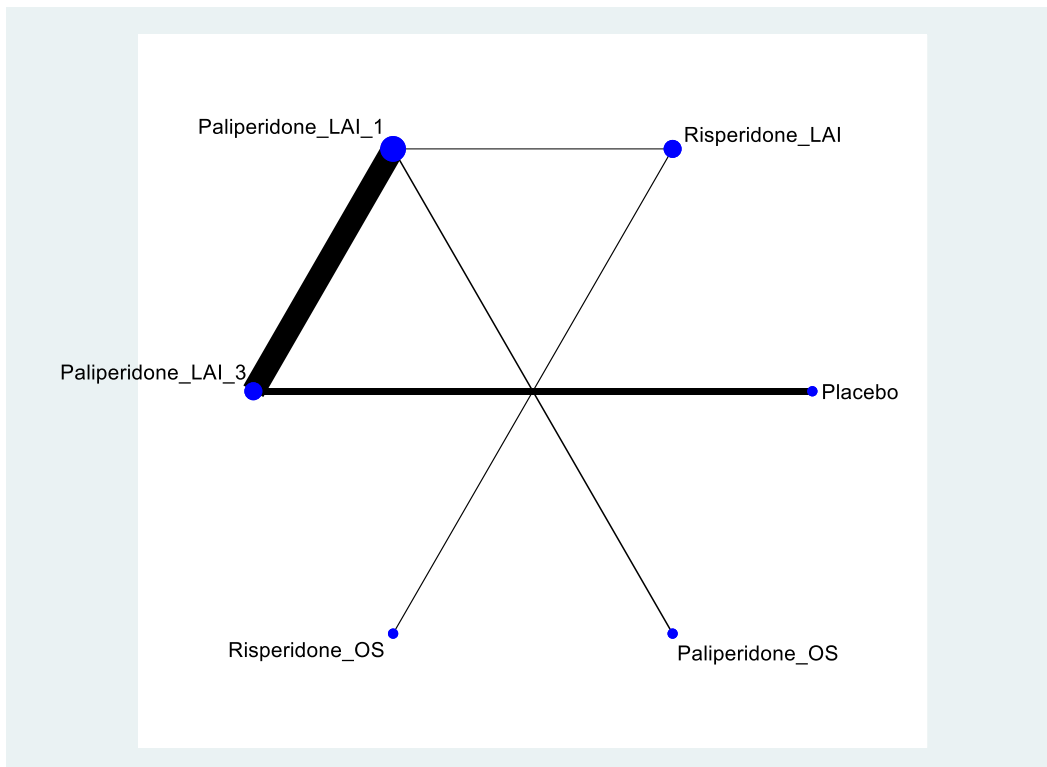

### Pairwise meta-analysis

| Study         | ES     | [95% Conf. Interval] |       |
|---------------|--------|----------------------|-------|
| -----         |        |                      |       |
| E - B         |        |                      |       |
| 2             | 0.364  | -0.196               | 0.923 |
| Sub-total     |        |                      |       |
| D+L pooled ES | 0.364  | -0.196               | 0.923 |
| -----         |        |                      |       |
| F - C         |        |                      |       |
| 32            | 0.188  | -0.299               | 0.676 |
| Sub-total     |        |                      |       |
| D+L pooled ES | 0.188  | -0.299               | 0.676 |
| -----         |        |                      |       |
| D - A         |        |                      |       |
| 34            | 0.449  | 0.220                | 0.678 |
| Sub-total     |        |                      |       |
| D+L pooled ES | 0.449  | 0.220                | 0.678 |
| -----         |        |                      |       |
| C - B         |        |                      |       |
| 42            | -0.855 | -1.760               | 0.051 |

|               |  |        |        |       |
|---------------|--|--------|--------|-------|
| Sub-total     |  |        |        |       |
| D+L pooled ES |  | -0.855 | -1.760 | 0.051 |
| -----         |  |        |        |       |
| D - C         |  |        |        |       |
| 59            |  | -0.062 | -0.188 | 0.064 |
| Sub-total     |  |        |        |       |
| D+L pooled ES |  | -0.062 | -0.188 | 0.064 |
| -----         |  |        |        |       |

Test(s) of heterogeneity:

|       | Heterogeneity<br>statistic | degrees of<br>freedom | P | I-squared** | Tau-squared |
|-------|----------------------------|-----------------------|---|-------------|-------------|
| E - B | 0.00                       | 0                     | . | .%          | 0.0000      |
| F - C | 0.00                       | 0                     | . | .%          | 0.0000      |
| D - A | 0.00                       | 0                     | . | .%          | 0.0000      |
| C - B | 0.00                       | 0                     | . | .%          | 0.0000      |
| D - C | 0.00                       | 0                     | . | .%          | 0.0000      |

\*\* I-squared: the variation in ES attributable to heterogeneity)

The network meta-analysis was not performed because of the limited number of studies per comparison and because one loop was formed of a 3-arm trial.

**Funnel plot**

Not applicable: no comparisons with 10 one more studies.

## Supplement U - Secondary outcome: QTc prolongation

### Treatment codes

|                    |   |
|--------------------|---|
| Placebo            | A |
| Aripiprazole LAI   | B |
| Paliperidone LAI-1 | C |
| Paliperidone LAI-3 | D |
| Aripiprazole OS    | E |

### Network map

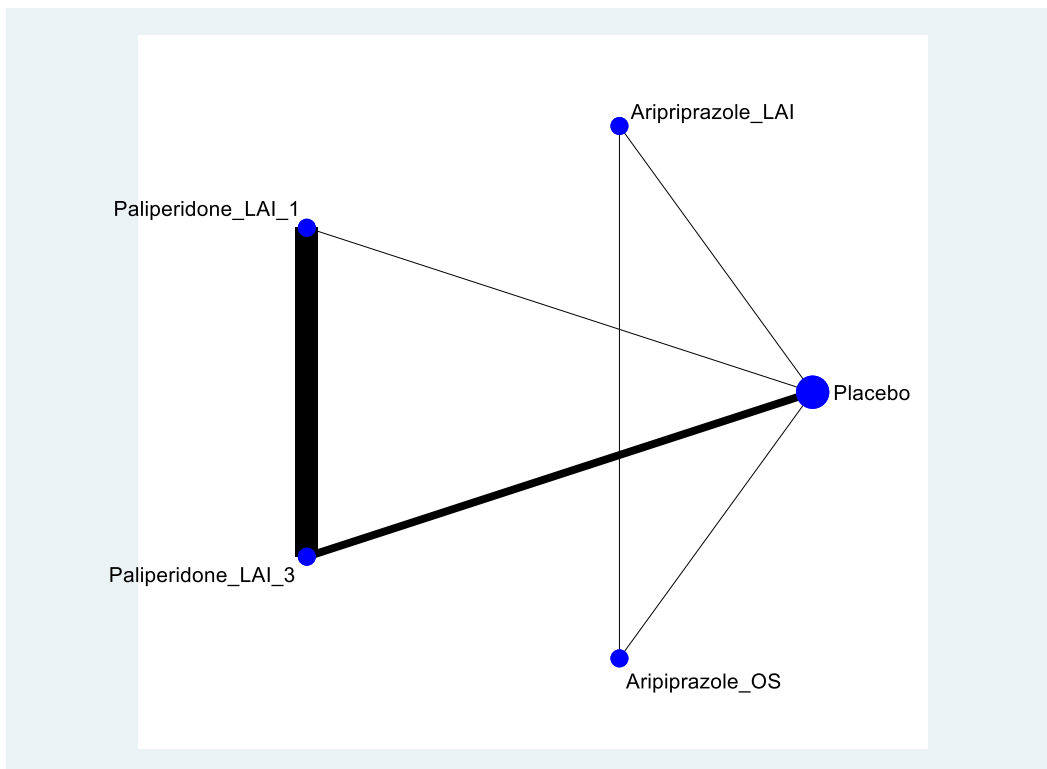

### Pairwise meta-analysis

| Study         | ES    | [95% Conf. Interval] |        |
|---------------|-------|----------------------|--------|
| -----         |       |                      |        |
| B - A         |       |                      |        |
| 6             | 0.496 | 0.010                | 24.870 |
| Sub-total     |       |                      |        |
| D+L pooled ES | 0.496 | 0.010                | 24.870 |
| -----         |       |                      |        |
| E - A         |       |                      |        |
| 6             | 0.494 | 0.010                | 24.777 |
| Sub-total     |       |                      |        |
| D+L pooled ES | 0.494 | 0.010                | 24.777 |
| -----         |       |                      |        |
| E - B         |       |                      |        |
| 6             | 0.996 | 0.020                | 50.024 |
| Sub-total     |       |                      |        |
| D+L pooled ES | 0.996 | 0.020                | 50.024 |
| -----         |       |                      |        |
| C - A         |       |                      |        |
| 28            | 0.110 | 0.006                | 2.031  |
| Sub-total     |       |                      |        |
| D+L pooled ES | 0.110 | 0.006                | 2.031  |
| -----         |       |                      |        |
| D - A         |       |                      |        |

|       |               |       |       |       |
|-------|---------------|-------|-------|-------|
| 34    |               | 1.318 | 0.633 | 2.746 |
|       | Sub-total     |       |       |       |
|       | D+L pooled ES | 1.318 | 0.633 | 2.746 |
| ----- |               |       |       |       |
|       | D - C         |       |       |       |
| 59    |               | 2.032 | 1.324 | 3.118 |
|       | Sub-total     |       |       |       |
|       | D+L pooled ES | 2.032 | 1.324 | 3.118 |
| ----- |               |       |       |       |

Test(s) of heterogeneity:

|       | Heterogeneity<br>statistic | degrees of<br>freedom | P | I-squared** | Tau-squared |
|-------|----------------------------|-----------------------|---|-------------|-------------|
| B - A | 0.00                       | 0                     | . | .%          | 0.0000      |
| E - A | 0.00                       | 0                     | . | .%          | 0.0000      |
| E - B | 0.00                       | 0                     | . | .%          | 0.0000      |
| C - A | 0.00                       | 0                     | . | .%          | 0.0000      |
| D - A | 0.00                       | 0                     | . | .%          | 0.0000      |
| D - C | 0.00                       | 0                     | . | .%          | 0.0000      |

\*\* I-squared: the variation in ES attributable to heterogeneity)

The network meta-analysis was not performed because of the limited number of studies per comparison and because one loop was formed of a 3-arm trial.

#### Funnel plot

Not applicable: no comparisons with 10 or more studies.



## Supplement V - Secondary outcome: sedation

### Treatment codes

|                  |   |
|------------------|---|
| Placebo          | A |
| Fluphenazine LAI | B |
| Flupenthixol LAI | C |
| Haloperidol LAI  | D |
| Clopenthixol LAI | E |
| Bromperidol LAI  | F |
| Phenotiazines OS | G |

### Network map

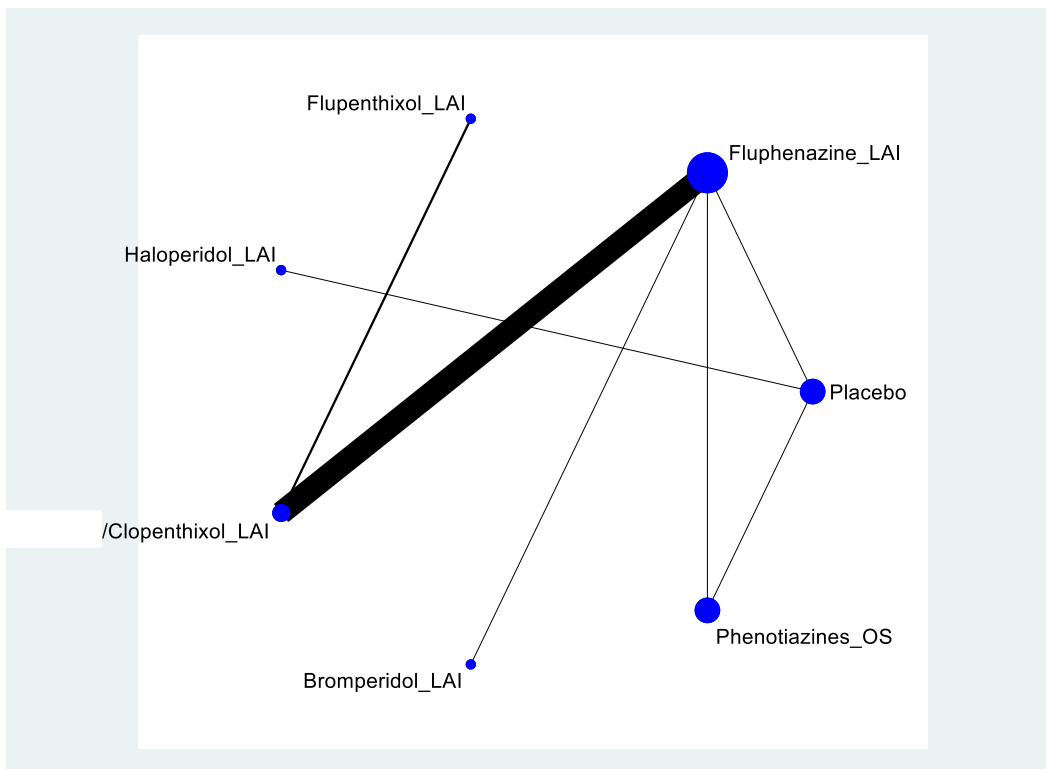

### Pairwise meta-analysis

| Study         | ES    | [95% Conf. Interval] |        |
|---------------|-------|----------------------|--------|
| -----         |       |                      |        |
| G - B         |       |                      |        |
| 11            | 0.448 | 0.009                | 21.981 |
| 12            | 2.483 | 0.106                | 58.204 |
| Sub-total     |       |                      |        |
| D+L pooled ES | 1.260 | 0.109                | 14.609 |
| -----         |       |                      |        |
| B - A         |       |                      |        |
| 12            | 0.958 | 0.020                | 46.313 |
| Sub-total     |       |                      |        |
| D+L pooled ES | 0.958 | 0.020                | 46.313 |
| -----         |       |                      |        |
| G - A         |       |                      |        |
| 12            | 2.379 | 0.102                | 55.717 |
| Sub-total     |       |                      |        |
| D+L pooled ES | 2.379 | 0.102                | 55.717 |
| -----         |       |                      |        |
| F - B         |       |                      |        |
| 27            | 2.087 | 0.203                | 21.478 |
| Sub-total     |       |                      |        |
| D+L pooled ES | 2.087 | 0.203                | 21.478 |
| -----         |       |                      |        |

|           |  |       |       |       |
|-----------|--|-------|-------|-------|
| D - A     |  |       |       |       |
| 31        |  | 0.333 | 0.015 | 7.619 |
| Sub-total |  |       |       |       |
|           |  | 0.333 | 0.015 | 7.619 |
| -----     |  |       |       |       |
| E - C     |  |       |       |       |
| 65        |  | 1.286 | 0.551 | 3.003 |
| Sub-total |  |       |       |       |
|           |  | 1.286 | 0.551 | 3.003 |
| -----     |  |       |       |       |
| E - B     |  |       |       |       |
| 77        |  | 0.991 | 0.758 | 1.295 |
| Sub-total |  |       |       |       |
|           |  | 0.991 | 0.758 | 1.295 |
| -----     |  |       |       |       |

Test(s) of heterogeneity:

|       | Heterogeneity<br>statistic | degrees of<br>freedom | P     | I-squared** | Tau-squared |
|-------|----------------------------|-----------------------|-------|-------------|-------------|
| G - B | 0.45                       | 1                     | 0.503 | 0.0%        | 0.0000      |
| B - A | 0.00                       | 0                     | .     | .%          | 0.0000      |
| G - A | 0.00                       | 0                     | .     | .%          | 0.0000      |
| F - B | 0.00                       | 0                     | .     | .%          | 0.0000      |
| D - A | 0.00                       | 0                     | .     | .%          | 0.0000      |
| E - C | 0.00                       | 0                     | .     | .%          | 0.0000      |
| E - B | 0.00                       | 0                     | .     | .%          | 0.0000      |

\*\* I-squared: the variation in ES attributable to heterogeneity)

The network meta-analysis was not performed because of the limited number of studies per comparison and because one loop was formed of a 3-arm trial.

## Supplement W - Secondary outcome: hospitalization

### Treatment codes

|                    |   |
|--------------------|---|
| Placebo            | A |
| Fluphenazine LAI   | B |
| Haloperidol LAI    | C |
| Clopenthiol LAI    | D |
| Pipothiazine LAI   | E |
| Aripiprazole LAI   | F |
| Paliperidone LAI-1 | G |
| Paliperidone LAI-3 | H |
| Phenotiazines OS   | I |
| DBP_OS             | J |

### Network map

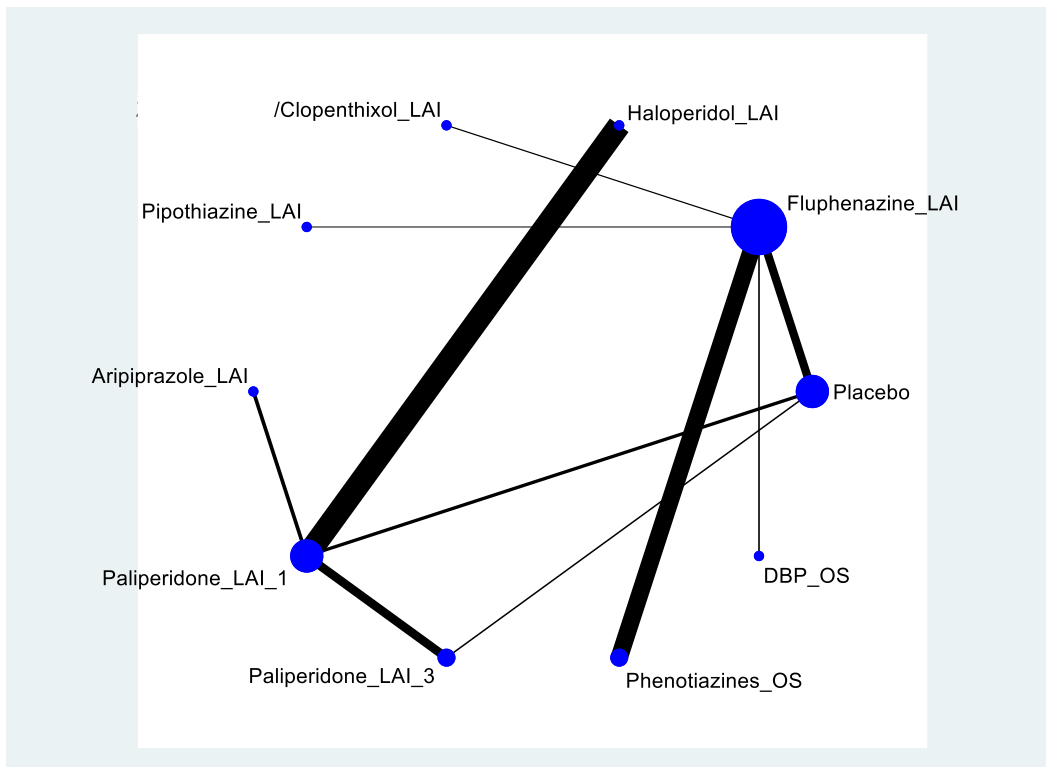

### Pairwise meta-analysis

| Study         | ES    | [95% Conf. Interval] |         |
|---------------|-------|----------------------|---------|
| -----         |       |                      |         |
| I - B         |       |                      |         |
| 14            | 1.310 | 0.833                | 2.058   |
| 19            | 7.500 | 0.438                | 128.401 |
| Sub-total     |       |                      |         |
| D+L pooled ES | 1.744 | 0.491                | 6.187   |
| -----         |       |                      |         |
| G - F         |       |                      |         |
| 24            | 2.353 | 0.894                | 6.192   |
| Sub-total     |       |                      |         |
| D+L pooled ES | 2.353 | 0.894                | 6.192   |
| -----         |       |                      |         |
| H - A         |       |                      |         |
| 34            | 0.181 | 0.040                | 0.813   |
| Sub-total     |       |                      |         |
| D+L pooled ES | 0.181 | 0.040                | 0.813   |
| -----         |       |                      |         |
| B - A         |       |                      |         |
| 37            | 0.326 | 0.157                | 0.677   |

|               |  |       |       |        |
|---------------|--|-------|-------|--------|
| 38            |  | 0.182 | 0.044 | 0.744  |
| Sub-total     |  |       |       |        |
| D+L pooled ES |  | 0.288 | 0.151 | 0.551  |
| -----         |  |       |       |        |
| G - C         |  |       |       |        |
| 49            |  | 1.269 | 0.861 | 1.872  |
| Sub-total     |  |       |       |        |
| D+L pooled ES |  | 1.269 | 0.861 | 1.872  |
| -----         |  |       |       |        |
| G - A         |  |       |       |        |
| 54            |  | 0.432 | 0.156 | 1.199  |
| Sub-total     |  |       |       |        |
| D+L pooled ES |  | 0.432 | 0.156 | 1.199  |
| -----         |  |       |       |        |
| H - G         |  |       |       |        |
| 59            |  | 0.739 | 0.393 | 1.390  |
| Sub-total     |  |       |       |        |
| D+L pooled ES |  | 0.739 | 0.393 | 1.390  |
| -----         |  |       |       |        |
| J - B         |  |       |       |        |
| 61            |  | 1.118 | 0.259 | 4.815  |
| Sub-total     |  |       |       |        |
| D+L pooled ES |  | 1.118 | 0.259 | 4.815  |
| -----         |  |       |       |        |
| E - B         |  |       |       |        |
| 68            |  | 5.000 | 0.259 | 96.587 |
| Sub-total     |  |       |       |        |
| D+L pooled ES |  | 5.000 | 0.259 | 96.587 |
| -----         |  |       |       |        |
| D - B         |  |       |       |        |
| 77            |  | 0.702 | 0.131 | 3.748  |
| Sub-total     |  |       |       |        |
| D+L pooled ES |  | 0.702 | 0.131 | 3.748  |
| -----         |  |       |       |        |

Test(s) of heterogeneity:

|       | Heterogeneity<br>statistic | degrees of<br>freedom | P     | I-squared** | Tau-squared |
|-------|----------------------------|-----------------------|-------|-------------|-------------|
| I - B | 1.41                       | 1                     | 0.234 | 29.3%       | 0.4463      |
| G - F | 0.00                       | 0                     | .     | .%          | 0.0000      |
| H - A | 0.00                       | 0                     | .     | .%          | 0.0000      |
| B - A | 0.52                       | 1                     | 0.471 | 0.0%        | 0.0000      |
| G - C | 0.00                       | 0                     | .     | .%          | 0.0000      |
| G - A | 0.00                       | 0                     | .     | .%          | 0.0000      |
| H - G | 0.00                       | 0                     | .     | .%          | 0.0000      |
| J - B | 0.00                       | 0                     | .     | .%          | 0.0000      |
| E - B | 0.00                       | 0                     | .     | .%          | 0.0000      |
| D - B | 0.00                       | 0                     | .     | .%          | 0.0000      |

\*\* I-squared: the variation in ES attributable to heterogeneity)

### Net league table

|                  |                   |                   |                    |                  |                    |                    |                   |                   |                   |
|------------------|-------------------|-------------------|--------------------|------------------|--------------------|--------------------|-------------------|-------------------|-------------------|
| Fluphenazine_LAI | 1.01 (0.32,3.18)  | 0.70 (0.13,3.75)  | 5.00 (0.26,96.57)  | 0.54 (0.13,2.32) | 1.28 (0.43,3.77)   | 0.89 (0.28,2.78)   | 3.47 (1.81,6.64)  | 1.37 (0.87,2.14)  | 1.12 (0.26,4.81)  |
| 0.99 (0.31,3.13) | Haloperidol_LAI   | 0.70 (0.09,5.32)  | 4.97 (0.21,118.94) | 0.54 (0.19,1.53) | 1.27 (0.86,1.87)   | 0.88 (0.43,1.80)   | 3.45 (1.34,8.90)  | 1.36 (0.40,4.66)  | 1.11 (0.17,7.12)  |
| 1.42 (0.27,7.61) | 1.43 (0.19,10.94) | Clopentixol_LAI   | 7.12 (0.24,213.90) | 0.77 (0.08,7.10) | 1.82 (0.25,13.37)  | 1.27 (0.17,9.60)   | 4.94 (0.82,29.81) | 1.95 (0.34,11.03) | 1.59 (0.17,14.70) |
| 0.20 (0.01,3.86) | 0.20 (0.01,4.82)  | 0.14 (0.00,4.21)  | Pipothiazine_LAI   | 0.11 (0.00,2.94) | 0.26 (0.01,5.98)   | 0.18 (0.01,4.24)   | 0.69 (0.03,14.38) | 0.27 (0.01,5.46)  | 0.22 (0.01,6.07)  |
| 1.84 (0.43,7.86) | 1.85 (0.65,5.26)  | 1.29 (0.14,11.85) | 9.21 (0.34,248.90) | Aripiprazole_LAI | 2.35 (0.89,6.19)   | 1.64 (0.52,5.10)   | 6.39 (1.74,23.39) | 2.52 (0.55,11.49) | 2.06 (0.26,16.12) |
| 0.78 (0.27,2.31) | 0.79 (0.53,1.16)  | 0.55 (0.07,4.03)  | 3.91 (0.17,91.49)  | 0.43 (0.16,1.12) | Paliperidone_LAI_1 | 0.69 (0.38,1.26)   | 2.72 (1.14,6.45)  | 1.07 (0.33,3.45)  | 0.87 (0.14,5.38)  |
| 1.13 (0.36,3.52) | 1.13 (0.56,2.31)  | 0.79 (0.10,6.00)  | 5.63 (0.24,134.40) | 0.61 (0.20,1.91) | 1.44 (0.79,2.61)   | Paliperidone_LAI_3 | 3.91 (1.53,9.98)  | 1.54 (0.45,5.24)  | 1.26 (0.20,8.03)  |
| 0.29 (0.15,0.55) | 0.29 (0.11,0.75)  | 0.20 (0.03,1.22)  | 1.44 (0.07,29.85)  | 0.16 (0.04,0.57) | 0.37 (0.16,0.87)   | 0.26 (0.10,0.65)   | Placebo           | 0.39 (0.18,0.87)  | 0.32 (0.07,1.59)  |
| 0.73 (0.47,1.14) | 0.74 (0.21,2.53)  | 0.51 (0.09,2.91)  | 3.66 (0.18,73.03)  | 0.40 (0.09,1.81) | 0.93 (0.29,3.01)   | 0.65 (0.19,2.21)   | 2.54 (1.15,5.58)  | Phenotiazines_OS  | 0.82 (0.18,3.76)  |
| 0.89 (0.21,3.85) | 0.90 (0.14,5.77)  | 0.63 (0.07,5.80)  | 4.47 (0.16,121.45) | 0.49 (0.06,3.81) | 1.14 (0.19,7.04)   | 0.79 (0.12,5.07)   | 3.10 (0.63,15.34) | 1.22 (0.27,5.63)  | DBP_OS            |

Net league table: head-to-head comparisons. Relative risks (RRs) and 95% confidence intervals (CIs) are reported. RRs lower than 1 favour the column-defining treatment. Statistically significant results are highlighted in grey. LAI=long-acting antipsychotics

### Evaluation of heterogeneity and incoherence

Overall heterogeneity  
 Estimated between-studies SD: 1.029e-07

Overall incoherence  
 Design-by-treatment test: P = 1.000

Loop-specific approach  
 \* 1 triangular loops found

Note: Heterogeneity of loop A-G-H cannot be estimated due to insufficient observations - set equal to 0

Evaluation of inconsistency using loop-specific heterogeneity estimates:

| Loop  | ROR   | z_value | p_value | CI_95        | Loop_Heterog_tau2 |
|-------|-------|---------|---------|--------------|-------------------|
| A-G-H | 1.761 | 0.577   | 0.564   | (1.00,12.04) | 0.000             |

Consistency between direct and indirect estimates

| Side  | Direct    |           | Indirect  |           | Difference |           |       |
|-------|-----------|-----------|-----------|-----------|------------|-----------|-------|
|       | Coef.     | Std. Err. | Coef.     | Std. Err. | Coef.      | Std. Err. | P> z  |
| A B * | -1.244225 | .3308943  | -.1464755 | 33.5463   | -1.09775   | 33.54793  | 0.974 |
| A G   | -.8395367 | .5209159  | -1.40454  | .8310223  | .5650033   | .9807913  | 0.565 |
| A H   | -1.707878 | .7660636  | -1.142079 | .6126397  | -.5657987  | .9809082  | 0.564 |
| B D * | -.3541718 | .8548109  | 2.448118  | 164.9167  | -2.802289  | 164.9179  | 0.986 |
| B E * | 1.609438  | 1.510746  | 1.900453  | 203.3253  | -.2910156  | 203.3388  | 0.999 |
| B I * | .3128138  | .2278617  | 2.638562  | 94.83706  | -2.325748  | 94.83758  | 0.980 |
| B J * | .1112256  | .7451252  | 2.491368  | 141.4049  | -2.380143  | 141.4069  | 0.987 |
| C G * | .2385359  | .198182   | -1.981655 | 109.2896  | 2.220191   | 109.2898  | 0.984 |
| F G * | .8556661  | .4936856  | -1.812262 | 140.5942  | 2.667928   | 140.5942  | 0.985 |
| G H   | -.3027058 | .3225171  | -.8684844 | .9263727  | .5657786   | .9809096  | 0.564 |

\* Warning: all the evidence about these contrasts comes from the trials which directly compare them.

Funnel plot

Not applicable: no comparisons with 10 one more studies.

## Supplement X - Secondary outcome: weight gain

### Treatment codes

|                    |   |
|--------------------|---|
| Placebo            | A |
| Fluphenazine LAI   | B |
| Haloperidol LAI    | C |
| Pipothiazine LAI   | D |
| Bromperidol LAI    | E |
| Olanzapine LAI     | F |
| Risperidone LAI    | G |
| Aripiprazole LAI   | H |
| Paliperidone LAI-1 | I |
| Paliperidone LAI-3 | J |
| Phenothiazines OS  | K |
| Aripiprazole OS    | L |
| Olanzapine OS      | M |
| Risperidone OS     | N |
| Quetiapine OS      | O |
| Paliperidone OS    | P |

### Network map

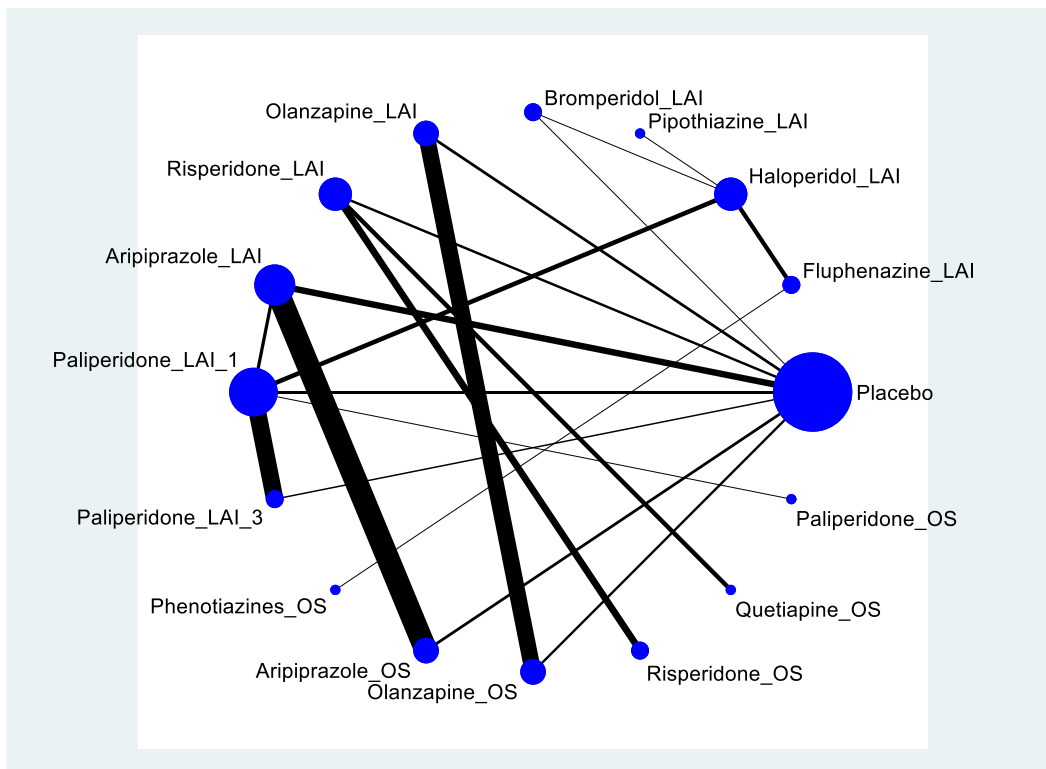

### Pairwise meta-analysis

| Study         | ES    | [95% Conf. Interval] |       |
|---------------|-------|----------------------|-------|
| -----         |       |                      |       |
| N - G         |       |                      |       |
| 1             | 0.841 | 0.487                | 1.452 |
| 58            | 0.929 | 0.392                | 2.201 |
| Sub-total     |       |                      |       |
| D+L pooled ES | 0.865 | 0.545                | 1.373 |
| -----         |       |                      |       |
| H - A         |       |                      |       |
| 6             | 2.595 | 1.255                | 5.367 |
| 39            | 0.996 | 0.529                | 1.876 |
| Sub-total     |       |                      |       |

|                  |       |       |        |
|------------------|-------|-------|--------|
| D+L pooled ES    | 1.580 | 0.619 | 4.036  |
| -----            |       |       |        |
| L - A            |       |       |        |
| 6 Sub-total      | 2.647 | 1.282 | 5.466  |
| D+L pooled ES    | 2.647 | 1.282 | 5.466  |
| -----            |       |       |        |
| L - H            |       |       |        |
| 6 Sub-total      | 1.020 | 0.691 | 1.506  |
| 7 D+L pooled ES  | 1.346 | 0.968 | 1.873  |
| Sub-total        |       |       |        |
| D+L pooled ES    | 1.196 | 0.913 | 1.565  |
| -----            |       |       |        |
| F - A            |       |       |        |
| 8 Sub-total      | 1.472 | 0.713 | 3.040  |
| D+L pooled ES    | 1.472 | 0.713 | 3.040  |
| -----            |       |       |        |
| M - A            |       |       |        |
| 8 Sub-total      | 1.342 | 0.618 | 2.914  |
| D+L pooled ES    | 1.342 | 0.618 | 2.914  |
| -----            |       |       |        |
| M - F            |       |       |        |
| 8 Sub-total      | 0.911 | 0.570 | 1.457  |
| 9 D+L pooled ES  | 0.992 | 0.676 | 1.457  |
| Sub-total        |       |       |        |
| D+L pooled ES    | 0.959 | 0.712 | 1.291  |
| -----            |       |       |        |
| K - B            |       |       |        |
| 11 Sub-total     | 0.149 | 0.006 | 3.547  |
| D+L pooled ES    | 0.149 | 0.006 | 3.547  |
| -----            |       |       |        |
| O - G            |       |       |        |
| 17 Sub-total     | 0.913 | 0.515 | 1.619  |
| D+L pooled ES    | 0.913 | 0.515 | 1.619  |
| -----            |       |       |        |
| I - H            |       |       |        |
| 23 Sub-total     | 1.471 | 0.755 | 2.869  |
| D+L pooled ES    | 1.471 | 0.755 | 2.869  |
| -----            |       |       |        |
| I - A            |       |       |        |
| 28 Sub-total     | 7.427 | 1.720 | 32.066 |
| 54 D+L pooled ES | 1.814 | 0.782 | 4.209  |
| Sub-total        |       |       |        |
| D+L pooled ES    | 3.216 | 0.828 | 12.492 |
| -----            |       |       |        |
| G - A            |       |       |        |
| 29 Sub-total     | 0.487 | 0.226 | 1.048  |
| D+L pooled ES    | 0.487 | 0.226 | 1.048  |
| -----            |       |       |        |
| E - A            |       |       |        |
| 30 Sub-total     | 3.000 | 0.137 | 65.903 |
| D+L pooled ES    | 3.000 | 0.137 | 65.903 |
| -----            |       |       |        |
| P - I            |       |       |        |
| 32 Sub-total     | 1.000 | 0.020 | 49.075 |
| D+L pooled ES    | 1.000 | 0.020 | 49.075 |
| -----            |       |       |        |
| J - A            |       |       |        |
| 34 Sub-total     | 2.719 | 1.013 | 7.294  |
| D+L pooled ES    | 2.719 | 1.013 | 7.294  |
| -----            |       |       |        |
| C - B            |       |       |        |
| 46 Sub-total     | 0.575 | 0.322 | 1.027  |
| D+L pooled ES    | 0.575 | 0.322 | 1.027  |
| -----            |       |       |        |
| I - C            |       |       |        |
| 49 Sub-total     | 2.223 | 1.263 | 3.913  |
| Sub-total        |       |       |        |

|               |  |       |       |        |
|---------------|--|-------|-------|--------|
| D+L pooled ES |  | 2.223 | 1.263 | 3.913  |
| -----         |  |       |       |        |
| D - C         |  |       |       |        |
| 50            |  | 2.450 | 0.734 | 8.183  |
| Sub-total     |  |       |       |        |
| D+L pooled ES |  | 2.450 | 0.734 | 8.183  |
| -----         |  |       |       |        |
| E - C         |  |       |       |        |
| 57            |  | 1.000 | 0.022 | 46.053 |
| Sub-total     |  |       |       |        |
| D+L pooled ES |  | 1.000 | 0.022 | 46.053 |
| -----         |  |       |       |        |
| J - I         |  |       |       |        |
| 59            |  | 0.941 | 0.705 | 1.256  |
| Sub-total     |  |       |       |        |
| D+L pooled ES |  | 0.941 | 0.705 | 1.256  |
| -----         |  |       |       |        |

Test(s) of heterogeneity:

|       | Heterogeneity statistic | degrees of freedom | P     | I-squared** | Tau-squared |
|-------|-------------------------|--------------------|-------|-------------|-------------|
| N - G | 0.04                    | 1                  | 0.848 | 0.0%        | 0.0000      |
| H - A | 3.79                    | 1                  | 0.051 | 73.6%       | 0.3375      |
| L - A | 0.00                    | 0                  | .     | 0.0%        | 0.0000      |
| L - H | 1.14                    | 1                  | 0.287 | 11.9%       | 0.0046      |
| F - A | 0.00                    | 0                  | .     | 0.0%        | 0.0000      |
| M - A | 0.00                    | 0                  | .     | 0.0%        | 0.0000      |
| M - F | 0.08                    | 1                  | 0.783 | 0.0%        | 0.0000      |
| K - B | 0.00                    | 0                  | .     | 0.0%        | 0.0000      |
| O - G | 0.00                    | 0                  | .     | 0.0%        | 0.0000      |
| I - H | 0.00                    | 0                  | .     | 0.0%        | 0.0000      |
| I - A | 2.68                    | 1                  | 0.102 | 62.7%       | 0.6228      |
| G - A | 0.00                    | 0                  | .     | 0.0%        | 0.0000      |
| E - A | 0.00                    | 0                  | .     | 0.0%        | 0.0000      |
| P - I | 0.00                    | 0                  | .     | 0.0%        | 0.0000      |
| J - A | 0.00                    | 0                  | .     | 0.0%        | 0.0000      |
| C - B | 0.00                    | 0                  | .     | 0.0%        | 0.0000      |
| I - C | 0.00                    | 0                  | .     | 0.0%        | 0.0000      |
| D - C | 0.00                    | 0                  | .     | 0.0%        | 0.0000      |
| E - C | 0.00                    | 0                  | .     | 0.0%        | 0.0000      |
| J - I | 0.00                    | 0                  | .     | 0.0%        | 0.0000      |

\*\* I-squared: the variation in ES attributable to heterogeneity)

**Net league table**

|                       |                      |                      |                       |                       |                      |                       |                        |                        |                      |                      |                       |                       |                      |                       |                        |
|-----------------------|----------------------|----------------------|-----------------------|-----------------------|----------------------|-----------------------|------------------------|------------------------|----------------------|----------------------|-----------------------|-----------------------|----------------------|-----------------------|------------------------|
| Fluphenazi<br>ne_LAI  | 0.57<br>(0.32,1.03)  | 1.41<br>(0.37,5.37)  | 1.03<br>(0.08,12.73)  | 0.73<br>(0.22,2.37)   | 0.24<br>(0.07,0.82)  | 0.78<br>(0.30,2.00)   | 1.26<br>(0.56,2.83)    | 1.20<br>(0.51,2.82)    | 0.50<br>(0.20,1.28)  | 0.15<br>(0.01,3.55)  | 0.96<br>(0.36,2.53)   | 0.70<br>(0.21,2.30)   | 0.21<br>(0.06,0.77)  | 0.22<br>(0.06,0.85)   | 1.26<br>(0.02,67.27)   |
| 1.74<br>(0.97,3.11)   | Haloperid<br>ol_LAI  | 2.45<br>(0.73,8.18)  | 1.79<br>(0.16,20.70)  | 1.27<br>(0.45,3.53)   | 0.43<br>(0.15,1.23)  | 1.35<br>(0.64,2.86)   | 2.20<br>(1.25,3.85)    | 2.09<br>(1.12,3.91)    | 0.88<br>(0.42,1.82)  | 0.26<br>(0.01,6.51)  | 1.66<br>(0.76,3.64)   | 1.22<br>(0.43,3.44)   | 0.37<br>(0.12,1.17)  | 0.39<br>(0.12,1.30)   | 2.20<br>(0.04,112.16)  |
| 0.71<br>(0.19,2.71)   | 0.41<br>(0.12,1.36)  | Pipothiazin<br>e_LAI | 0.73<br>(0.05,11.19)  | 0.52<br>(0.11,2.52)   | 0.17<br>(0.03,0.87)  | 0.55<br>(0.13,2.28)   | 0.90<br>(0.24,3.39)    | 0.85<br>(0.22,3.32)    | 0.36<br>(0.09,1.47)  | 0.11<br>(0.00,3.30)  | 0.68<br>(0.16,2.86)   | 0.50<br>(0.10,2.44)   | 0.15<br>(0.03,0.80)  | 0.16<br>(0.03,0.87)   | 0.90<br>(0.01,54.85)   |
| 0.97<br>(0.08,11.97)  | 0.56<br>(0.05,6.43)  | 1.37<br>(0.09,20.86) | Bromperid<br>ol_LAI   | 0.71<br>(0.06,8.82)   | 0.24<br>(0.02,3.01)  | 0.75<br>(0.07,8.68)   | 1.22<br>(0.11,13.93)   | 1.16<br>(0.10,13.40)   | 0.49<br>(0.04,5.50)  | 0.14<br>(0.00,8.26)  | 0.93<br>(0.08,10.80)  | 0.68<br>(0.05,8.51)   | 0.21<br>(0.02,2.72)  | 0.22<br>(0.02,2.93)   | 1.22<br>(0.01,120.57)  |
| 1.37<br>(0.42,4.46)   | 0.79<br>(0.28,2.20)  | 1.93<br>(0.40,9.41)  | 1.42<br>(0.11,17.69)  | Olanzapine<br>_LAI    | 0.34<br>(0.12,0.96)  | 1.07<br>(0.47,2.44)   | 1.73<br>(0.73,4.10)    | 1.65<br>(0.68,3.99)    | 0.69<br>(0.34,1.41)  | 0.21<br>(0.01,6.02)  | 1.31<br>(0.56,3.08)   | 0.96<br>(0.71,1.29)   | 0.29<br>(0.09,0.91)  | 0.31<br>(0.09,1.01)   | 1.73<br>(0.03,93.37)   |
| 4.08<br>(1.22,13.69)  | 2.35<br>(0.81,6.79)  | 5.75<br>(1.15,28.67) | 4.21<br>(0.33,53.44)  | 2.97<br>(1.04,8.49)   | Risperido<br>ne_LAI  | 3.17<br>(1.32,7.59)   | 5.15<br>(2.09,12.73)   | 4.90<br>(1.94,12.39)   | 2.05<br>(0.95,4.42)  | 0.61<br>(0.02,18.11) | 3.91<br>(1.59,9.57)   | 2.85<br>(0.99,8.26)   | 0.87<br>(0.55,1.37)  | 0.91<br>(0.51,1.62)   | 5.15<br>(0.09,280.45)  |
| 1.29<br>(0.50,3.33)   | 0.74<br>(0.35,1.57)  | 1.81<br>(0.44,7.51)  | 1.33<br>(0.12,15.34)  | 0.94<br>(0.41,2.15)   | 0.32<br>(0.13,0.76)  | 0.62<br>(0.19,1.41)   | 1.63<br>(0.99,2.68)    | 1.55<br>(0.89,2.69)    | 0.65<br>(0.43,0.98)  | 0.19<br>(0.01,5.25)  | 1.23<br>(0.96,1.58)   | 0.90<br>(0.39,2.10)   | 0.27<br>(0.10,0.73)  | 0.29<br>(0.10,0.82)   | 1.63<br>(0.03,82.39)   |
| 0.79<br>(0.35,1.78)   | 0.46<br>(0.26,0.80)  | 1.12<br>(0.30,4.22)  | 0.82<br>(0.07,9.31)   | 0.58<br>(0.24,1.37)   | 0.19<br>(0.08,0.48)  | 0.62<br>(0.37,1.01)   | Paliperidon<br>e_LAI_1 | 0.95<br>(0.72,1.26)    | 0.40<br>(0.25,0.64)  | 0.12<br>(0.00,3.11)  | 0.76<br>(0.44,1.31)   | 0.55<br>(0.23,1.33)   | 0.17<br>(0.06,0.46)  | 0.18<br>(0.06,0.52)   | 1.00<br>(0.02,49.07)   |
| 0.83<br>(0.35,1.96)   | 0.48<br>(0.26,0.90)  | 1.17<br>(0.30,4.57)  | 0.86<br>(0.07,9.90)   | 0.61<br>(0.25,1.47)   | 0.20<br>(0.08,0.52)  | 0.65<br>(0.37,1.12)   | 1.05<br>(0.79,1.39)    | Paliperidon<br>e_LAI_3 | 0.42<br>(0.25,0.71)  | 0.12<br>(0.00,3.31)  | 0.80<br>(0.44,1.44)   | 0.58<br>(0.24,1.43)   | 0.18<br>(0.06,0.50)  | 0.19<br>(0.06,0.55)   | 1.05<br>(0.02,52.11)   |
| 1.99<br>(0.78,5.07)   | 1.14<br>(0.55,2.38)  | 2.80<br>(0.68,11.48) | 2.05<br>(0.18,23.10)  | 1.45<br>(0.71,2.96)   | 0.49<br>(0.23,1.05)  | 1.54<br>(1.02,2.34)   | 2.51<br>(1.55,4.05)    | 2.39<br>(1.42,4.02)    | Placebo              | 0.30<br>(0.01,8.07)  | 1.90<br>(1.20,3.02)   | 1.39<br>(0.67,2.90)   | 0.42<br>(0.17,1.03)  | 0.44<br>(0.17,1.16)   | 2.51<br>(0.05,126.74)  |
| 6.69<br>(0.28,158.85) | 3.85<br>(0.15,96.24) | 9.42<br>(0.30,293.3) | 6.90<br>(0.12,393.48) | 4.88<br>(0.17,143.03) | 1.64<br>(0.06,48.63) | 5.19<br>(0.19,141.63) | 8.44<br>(0.32,221.81)  | 8.03<br>(0.30,213.51)  | 3.37<br>(0.12,91.50) | Phenotiazin<br>es_OS | 6.40<br>(0.23,175.91) | 4.67<br>(0.16,137.77) | 1.42<br>(0.05,43.41) | 1.50<br>(0.05,46.59)  | 8.44<br>(0.01,1362.04) |
| 1.05<br>(0.39,2.77)   | 0.60<br>(0.27,1.31)  | 1.47<br>(0.35,6.19)  | 1.08<br>(0.09,12.55)  | 0.76<br>(0.32,1.78)   | 0.26<br>(0.10,0.63)  | 0.81<br>(0.61,1.04)   | 1.32<br>(0.76,2.28)    | 1.25<br>(0.69,2.27)    | 0.53<br>(0.33,0.84)  | 0.16<br>(0.01,4.29)  | Aripiprazol<br>e_OS   | 0.73<br>(0.31,1.74)   | 0.22<br>(0.08,0.61)  | 0.23<br>(0.08,0.68)   | 1.32<br>(0.03,67.25)   |
| 1.43<br>(0.44,4.71)   | 0.82<br>(0.29,2.33)  | 2.02<br>(0.41,9.90)  | 1.48<br>(0.12,18.56)  | 1.04<br>(0.77,1.40)   | 0.35<br>(0.12,1.01)  | 1.11<br>(0.48,2.59)   | 1.81<br>(0.75,4.35)    | 1.72<br>(0.70,4.23)    | 0.72<br>(0.34,1.50)  | 0.21<br>(0.01,6.30)  | 1.37<br>(0.57,3.27)   | Olanzapine<br>_OS     | 0.30<br>(0.10,0.97)  | 0.32<br>(0.10,1.07)   | 1.81<br>(0.03,97.74)   |
| 4.72<br>(1.29,17.23)  | 2.71<br>(0.85,8.63)  | 6.65<br>(1.25,35.35) | 4.87<br>(0.37,64.38)  | 3.44<br>(1.09,10.81)  | 1.16<br>(0.73,1.83)  | 3.66<br>(1.36,9.83)   | 5.95<br>(2.16,16.43)   | 5.66<br>(2.01,15.96)   | 2.37<br>(0.97,5.81)  | 0.71<br>(0.02,21.59) | 4.51<br>(0.23,12.37)  | 3.30<br>(1.03,10.51)  | Risperido<br>ne_OS   | 1.06<br>(0.51,2.20)   | 5.95<br>(0.11,332.83)  |
| 4.47<br>(1.17,17.06)  | 2.57<br>(0.77,8.59)  | 6.30<br>(1.14,34.67) | 4.61<br>(0.34,62.38)  | 3.26<br>(0.99,10.76)  | 1.10<br>(0.62,1.94)  | 3.47<br>(1.22,9.86)   | 5.64<br>(1.93,16.46)   | 5.37<br>(1.80,15.96)   | 2.25<br>(0.86,5.86)  | 0.67<br>(0.02,20.81) | 4.28<br>(1.48,12.39)  | 3.12<br>(0.93,10.45)  | 0.95<br>(0.45,1.98)  | 5.64<br>(0.10,319.96) |                        |



|                      |                      |                      |                      |                      |                      |                      |                      |                      |                      |                      |                      |                      |                     |                      |                     |
|----------------------|----------------------|----------------------|----------------------|----------------------|----------------------|----------------------|----------------------|----------------------|----------------------|----------------------|----------------------|----------------------|---------------------|----------------------|---------------------|
| 0.79<br>(0.01,42.26) | 0.46<br>(0.01,23.27) | 1.12<br>(0.02,68.31) | 0.82<br>(0.01,80.58) | 0.58<br>(0.01,31.13) | 0.19<br>(0.00,10.56) | 0.62<br>(0.01,31.16) | 1.00<br>(0.02,49.08) | 0.95<br>(0.02,47.15) | 0.40<br>(0.01,20.15) | 0.12<br>(0.00,19.10) | 0.76<br>(0.01,38.66) | 0.55<br>(0.01,29.96) | 0.17<br>(0.00,9.39) | 0.18<br>(0.00,10.05) | Paliperidon<br>e_OS |
|----------------------|----------------------|----------------------|----------------------|----------------------|----------------------|----------------------|----------------------|----------------------|----------------------|----------------------|----------------------|----------------------|---------------------|----------------------|---------------------|

Net league table: head-to-head comparisons. Relative risks (RRs) and 95% confidence intervals (CIs) are reported. RRs lower than 1 favour the column-defining treatment. Statistically significant results are highlighted in grey. LAI=long-acting antipsychotics

### Evaluation of heterogeneity and incoherence

#### Overall heterogeneity

Estimated between-studies SD: 4.425e-07

#### Overall incoherence

Design-by-treatment test: P = 1.000

#### Loop-specific approach

\* 4 triangular loops found

\* 1 quadratic loops found

Note: Heterogeneity of loop A-F-M cannot be estimated due to insufficient observations - set equal to 0

Note: Heterogeneity of loop A-H-L cannot be estimated due to insufficient observations - set equal to 0

Note: Heterogeneity of loop A-I-J cannot be estimated due to insufficient observations - set equal to 0

Note: Heterogeneity of loop A-C-E-I cannot be estimated due to insufficient observations - set equal to 0

Evaluation of inconsistency using loop-specific heterogeneity estimates:

| Loop    | ROR   | z_value | p_value | CI_95         | Loop_Heterog_tau2 |
|---------|-------|---------|---------|---------------|-------------------|
| A-C-E-I | 2.589 | 0.372   | 0.710   | (1.00,386.78) | 0.000             |
| A-H-L   | 2.216 | 1.568   | 0.117   | (1.00,5.99)   | 0.000             |
| A-H-I   | 1.330 | 0.257   | 0.797   | (1.00,11.77)  | 0.408             |
| A-I-J   | 1.122 | 0.179   | 0.858   | (1.00,3.96)   | 0.000             |
| A-F-M   | 1.089 | 0.148   | 0.882   | (1.00,3.37)   | 0.000             |

### Consistency between direct and indirect estimates

| Side  | Direct<br>Coef. | Std. Err. | Indirect<br>Coef. | Std. Err. | Difference<br>Coef. | Std. Err. | P> z  |
|-------|-----------------|-----------|-------------------|-----------|---------------------|-----------|-------|
| A E   | 1.098612        | 1.57634   | .1111863          | 1.990335  | .987426             | 2.538953  | 0.697 |
| A F * | .3869263        | .3768577  | .2162432          | .6935436  | .1706831            | .651466   | 0.793 |
| A G * | -.7199944       | .3913455  | .0472039          | 59.11929  | -.7671983           | 59.12059  | 0.990 |
| A H   | .4598259        | .236033   | .3619816          | .3473574  | .0978443            | .3760203  | 0.795 |
| A I   | .9462533        | .3722341  | .8992376          | .3238626  | .0470157            | .4934017  | 0.924 |
| A J   | 1.000172        | .5035078  | .8189838          | .3130024  | .1811884            | .5928664  | 0.760 |
| A L   | .7062741        | .409532   | .6041764          | .3574341  | .1020977            | .5689088  | 0.858 |
| A M * | .2938666        | .4023004  | .4645076          | .6492695  | -.170641            | .6514748  | 0.793 |
| B C * | -.5538841       | .2962084  | .2437956          | 63.20006  | -.7976797           | 63.20137  | 0.990 |
| B K * | -1.900959       | 1.615848  | -1.504933         | 405.4014  | -.3960256           | 405.4012  | 0.999 |
| C D * | .896088         | .6152816  | -.440158          | 111.376   | 1.336246            | 111.3794  | 0.990 |
| C E   | 4.59e-12        | 1.954017  | .9873818          | 1.621184  | -.9873818           | 2.53898   | 0.697 |
| C I   | .7990134        | .2884709  | -.1760313         | 2.512231  | .9750447            | 2.528735  | 0.700 |
| F M   | .               | .         | .                 | .         | .                   | .         | .     |
| G N * | -.1447178       | .2354228  | 1.391361          | 136.0658  | -1.536078           | 136.0659  | 0.991 |
| G O * | -.0909718       | .2923414  | 1.437868          | 247.37    | -1.528839           | 247.3702  | 0.995 |
| H I   | .3862683        | .3405806  | .6143573          | .3859708  | -.2280891           | .5147511  | 0.658 |
| H L * | .1814193        | .1285025  | 1.520152          | .8866506  | -1.338732           | .8961658  | 0.135 |
| I J   | -.0612126       | .1474509  | .1199459          | .5742376  | -.1811585           | .5928664  | 0.760 |
| I P * | 4.97e-10        | 1.986441  | -1.838993         | 540.681   | 1.838993            | 540.6847  | 0.997 |

\* Warning: all the evidence about these contrasts comes from the trials which directly compare them.

### Funnel plot

Not applicable: no comparisons with 10 or more studies.

## Supplement Y - Secondary outcome: hyperprolactiaemia

### Treatment codes

|                    |   |
|--------------------|---|
| Placebo            | A |
| Fluphenazine LAI   | B |
| Haloperidol LAI    | C |
| Pipothiazine LAI   | D |
| Olanzapine LAI     | E |
| Risperidone LAI    | F |
| Aripiprazole LAI   | G |
| Paliperidone LAI-1 | H |
| Paliperidone LAI-3 | I |
| Aripiprazole OS    | J |
| Olanzapine OS      | K |
| Risperidone OS     | L |
| Quetiapine OS      | M |
| Paliperidone OS    | N |

### Network map

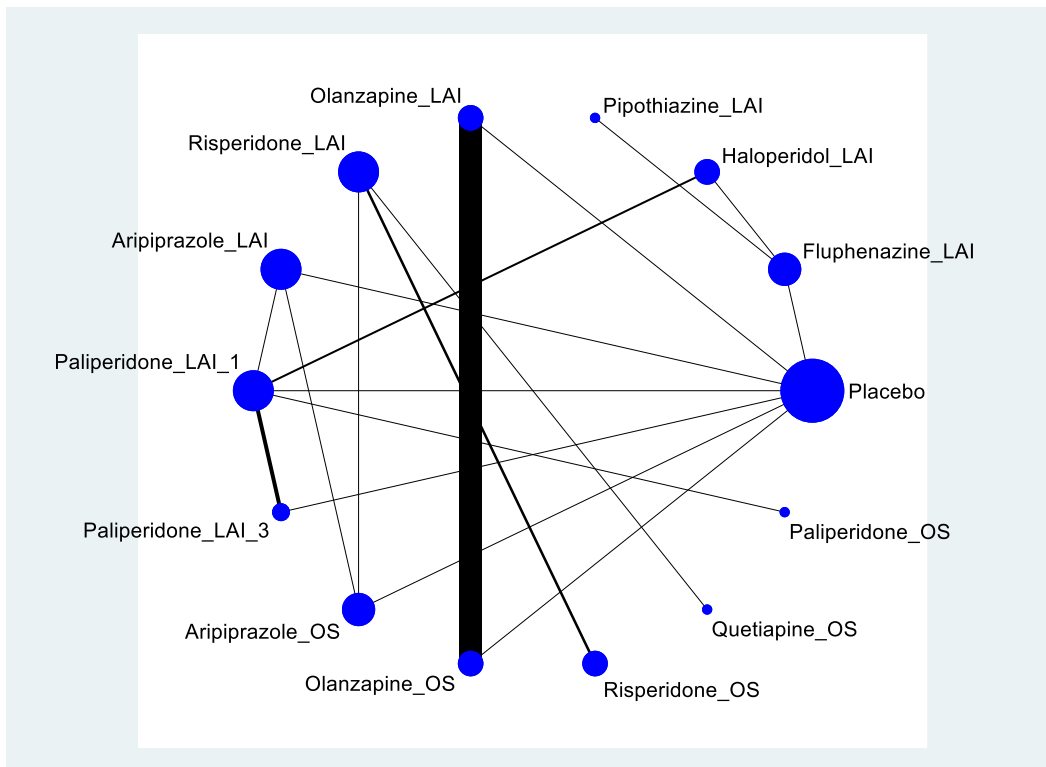

### Pairwise meta-analysis

| Study         | ES    | [95% Conf. Interval] |       |
|---------------|-------|----------------------|-------|
| -----         |       |                      |       |
| L - F         |       |                      |       |
| 1             | 1.988 | 0.605                | 6.534 |
| 3             | 1.065 | 0.830                | 1.365 |
| 58            | 1.565 | 1.082                | 2.264 |
| Sub-total     |       |                      |       |
| D+L pooled ES | 1.293 | 0.931                | 1.796 |
| -----         |       |                      |       |
| G - A         |       |                      |       |
| 6             | 1.153 | 0.454                | 2.933 |
| 39            | 0.277 | 0.095                | 0.810 |
| Sub-total     |       |                      |       |
| D+L pooled ES | 0.580 | 0.143                | 2.346 |

|           |               |       |       |         |
|-----------|---------------|-------|-------|---------|
| -----     |               |       |       |         |
| J - A     |               |       |       |         |
| 6         |               | 0.739 | 0.269 | 2.031   |
| Sub-total |               |       |       |         |
|           | D+L pooled ES | 0.739 | 0.269 | 2.031   |
| -----     |               |       |       |         |
| J - G     |               |       |       |         |
| 6         |               | 0.640 | 0.282 | 1.454   |
| 7         |               | 0.377 | 0.101 | 1.402   |
| Sub-total |               |       |       |         |
|           | D+L pooled ES | 0.552 | 0.275 | 1.107   |
| -----     |               |       |       |         |
| E - A     |               |       |       |         |
| 8         |               | 2.201 | 1.533 | 3.159   |
| Sub-total |               |       |       |         |
|           | D+L pooled ES | 2.201 | 1.533 | 3.159   |
| -----     |               |       |       |         |
| K - A     |               |       |       |         |
| 8         |               | 1.909 | 1.307 | 2.789   |
| Sub-total |               |       |       |         |
|           | D+L pooled ES | 1.909 | 1.307 | 2.789   |
| -----     |               |       |       |         |
| K - E     |               |       |       |         |
| 8         |               | 0.868 | 0.725 | 1.039   |
| 9         |               | 0.975 | 0.906 | 1.049   |
| Sub-total |               |       |       |         |
|           | D+L pooled ES | 0.948 | 0.860 | 1.045   |
| -----     |               |       |       |         |
| M - F     |               |       |       |         |
| 17        |               | 0.244 | 0.129 | 0.465   |
| Sub-total |               |       |       |         |
|           | D+L pooled ES | 0.244 | 0.129 | 0.465   |
| -----     |               |       |       |         |
| J - F     |               |       |       |         |
| 18        |               | 0.081 | 0.020 | 0.338   |
| Sub-total |               |       |       |         |
|           | D+L pooled ES | 0.081 | 0.020 | 0.338   |
| -----     |               |       |       |         |
| H - G     |               |       |       |         |
| 24        |               | 8.827 | 0.488 | 159.797 |
| Sub-total |               |       |       |         |
|           | D+L pooled ES | 8.827 | 0.488 | 159.797 |
| -----     |               |       |       |         |
| N - H     |               |       |       |         |
| 32        |               | 1.000 | 0.065 | 15.380  |
| Sub-total |               |       |       |         |
|           | D+L pooled ES | 1.000 | 0.065 | 15.380  |
| -----     |               |       |       |         |
| I - A     |               |       |       |         |
| 34        |               | 2.720 | 0.112 | 66.259  |
| Sub-total |               |       |       |         |
|           | D+L pooled ES | 2.720 | 0.112 | 66.259  |
| -----     |               |       |       |         |
| B - A     |               |       |       |         |
| 45        |               | 3.000 | 0.750 | 11.995  |
| Sub-total |               |       |       |         |
|           | D+L pooled ES | 3.000 | 0.750 | 11.995  |
| -----     |               |       |       |         |
| C - B     |               |       |       |         |
| 46        |               | 1.033 | 0.021 | 50.423  |
| 47        |               | 0.909 | 0.020 | 41.676  |
| Sub-total |               |       |       |         |
|           | D+L pooled ES | 0.968 | 0.063 | 14.796  |
| -----     |               |       |       |         |
| H - C     |               |       |       |         |
| 49        |               | 1.746 | 1.389 | 2.194   |
| Sub-total |               |       |       |         |
|           | D+L pooled ES | 1.746 | 1.389 | 2.194   |
| -----     |               |       |       |         |
| H - A     |               |       |       |         |
| 54        |               | 2.851 | 0.926 | 8.772   |
| Sub-total |               |       |       |         |
|           | D+L pooled ES | 2.851 | 0.926 | 8.772   |
| -----     |               |       |       |         |
| I - H     |               |       |       |         |
| 59        |               | 0.921 | 0.782 | 1.085   |
| Sub-total |               |       |       |         |
|           | D+L pooled ES | 0.921 | 0.782 | 1.085   |
| -----     |               |       |       |         |

| D - B         |  |       |              |
|---------------|--|-------|--------------|
| 68            |  | 3.000 | 0.131 68.568 |
| Sub-total     |  |       |              |
| D+L pooled ES |  | 3.000 | 0.131 68.568 |

Test(s) of heterogeneity:

|       | Heterogeneity statistic | degrees of freedom | P     | I-squared** | Tau-squared |
|-------|-------------------------|--------------------|-------|-------------|-------------|
| L - F | 3.55                    | 2                  | 0.169 | 43.7%       | 0.0361      |
| G - A | 3.87                    | 1                  | 0.049 | 74.2%       | 0.7555      |
| J - A | 0.00                    | 0                  | .     | 0.0%        | 0.0000      |
| J - G | 0.45                    | 1                  | 0.502 | 0.0%        | 0.0000      |
| E - A | 0.00                    | 0                  | .     | 0.0%        | 0.0000      |
| K - A | 0.00                    | 0                  | .     | 0.0%        | 0.0000      |
| K - E | 1.38                    | 1                  | 0.239 | 27.7%       | 0.0019      |
| M - F | 0.00                    | 0                  | .     | 0.0%        | 0.0000      |
| J - F | 0.00                    | 0                  | .     | 0.0%        | 0.0000      |
| H - G | 0.00                    | 0                  | .     | 0.0%        | 0.0000      |
| N - H | 0.00                    | 0                  | .     | 0.0%        | 0.0000      |
| I - A | 0.00                    | 0                  | .     | 0.0%        | 0.0000      |
| B - A | 0.00                    | 0                  | .     | 0.0%        | 0.0000      |
| C - B | 0.00                    | 1                  | 0.963 | 0.0%        | 0.0000      |
| H - C | 0.00                    | 0                  | .     | 0.0%        | 0.0000      |
| H - A | 0.00                    | 0                  | .     | 0.0%        | 0.0000      |
| I - H | 0.00                    | 0                  | .     | 0.0%        | 0.0000      |
| D - B | 0.00                    | 0                  | .     | 0.0%        | 0.0000      |

\*\* I-squared: the variation in ES attributable to heterogeneity)

### Net league table

|                      |                      |                        |                      |                       |                     |                      |                      |                     |                     |                      |                       |                      |                       |
|----------------------|----------------------|------------------------|----------------------|-----------------------|---------------------|----------------------|----------------------|---------------------|---------------------|----------------------|-----------------------|----------------------|-----------------------|
| Fluphenazine_LAI     | 0.68<br>(0.16,2.99)  | 3.00<br>(0.13,69.00)   | 0.78<br>(0.21,2.94)  | 1.81<br>(0.22,14.73)  | 0.23<br>(0.05,0.97) | 1.19<br>(0.28,5.13)  | 1.09<br>(0.25,4.81)  | 0.37<br>(0.10,1.29) | 0.15<br>(0.03,0.68) | 0.73<br>(0.19,2.75)  | 2.26<br>(0.27,18.75)  | 0.44<br>(0.05,4.00)  | 1.19<br>(0.05,26.54)  |
| 1.46<br>(0.33,6.40)  | Haloperidol_LAI      | 4.39<br>(0.14,140.42)  | 1.14<br>(0.39,3.36)  | 2.65<br>(0.38,18.30)  | 0.34<br>(0.10,1.09) | 1.74<br>(1.28,2.35)  | 1.60<br>(1.08,2.38)  | 0.53<br>(0.20,1.45) | 0.22<br>(0.06,0.78) | 1.06<br>(0.36,3.14)  | 3.31<br>(0.47,23.29)  | 0.65<br>(0.08,5.01)  | 1.74<br>(0.11,27.38)  |
| 0.33<br>(0.01,7.67)  | 0.23<br>(0.01,7.29)  | Pipothiazine_LAI       | 0.26<br>(0.01,7.83)  | 0.60<br>(0.01,26.22)  | 0.08<br>(0.00,2.41) | 0.40<br>(0.01,12.60) | 0.36<br>(0.01,11.69) | 0.12<br>(0.00,3.58) | 0.05<br>(0.00,1.60) | 0.24<br>(0.01,7.31)  | 0.75<br>(0.02,33.11)  | 0.15<br>(0.00,6.80)  | 0.40<br>(0.00,32.70)  |
| 1.28<br>(0.34,4.82)  | 0.88<br>(0.30,2.57)  | 3.84<br>(0.13,115.66)  | Olanzapine_LAI       | 2.32<br>(0.41,13.03)  | 0.30<br>(0.13,0.66) | 1.52<br>(0.54,4.32)  | 1.40<br>(0.48,4.08)  | 0.47<br>(0.31,0.70) | 0.19<br>(0.07,0.49) | 0.93<br>(0.78,1.11)  | 2.90<br>(0.50,16.64)  | 0.57<br>(0.09,3.62)  | 1.52<br>(0.08,28.56)  |
| 0.55<br>(0.07,4.50)  | 0.38<br>(0.05,2.61)  | 1.66<br>(0.04,72.09)   | 0.43<br>(0.08,2.43)  | Risperidone_LAI       | 0.13<br>(0.03,0.63) | 0.66<br>(0.10,4.45)  | 0.60<br>(0.09,4.16)  | 0.20<br>(0.04,1.08) | 0.08<br>(0.02,0.34) | 0.40<br>(0.07,2.27)  | 1.25<br>(0.95,1.64)   | 0.24<br>(0.12,0.48)  | 0.66<br>(0.02,18.58)  |
| 4.34<br>(1.04,18.19) | 2.97<br>(0.92,9.58)  | 13.02<br>(0.41,409.12) | 3.39<br>(1.52,7.56)  | 7.85<br>(1.59,38.85)  | Aripiprazole_LAI    | 5.16<br>(1.65,16.13) | 4.75<br>(1.48,15.20) | 1.59<br>(0.79,3.17) | 0.64<br>(0.32,1.28) | 3.16<br>(1.41,7.07)  | 9.82<br>(1.94,49.75)  | 1.92<br>(0.34,10.88) | 5.16<br>(0.27,100.32) |
| 0.84<br>(0.19,3.63)  | 0.58<br>(0.43,0.78)  | 2.53<br>(0.08,80.32)   | 0.66<br>(0.23,1.86)  | 1.52<br>(0.22,10.32)  | 0.19<br>(0.06,0.61) | Paliperidone_LAI_1   | 0.92<br>(0.71,1.19)  | 0.31<br>(0.12,0.80) | 0.12<br>(0.04,0.44) | 0.61<br>(0.21,1.75)  | 1.90<br>(0.28,13.15)  | 0.37<br>(0.05,2.83)  | 1.00<br>(0.06,15.49)  |
| 0.91<br>(0.21,4.02)  | 0.62<br>(0.42,0.93)  | 2.74<br>(0.09,87.97)   | 0.71<br>(0.25,2.08)  | 1.65<br>(0.24,11.38)  | 0.21<br>(0.07,0.67) | 1.09<br>(0.84,1.40)  | Paliperidone_LAI_3   | 0.33<br>(0.12,0.90) | 0.13<br>(0.04,0.49) | 0.67<br>(0.23,1.94)  | 2.07<br>(0.30,14.49)  | 0.40<br>(0.05,3.12)  | 1.09<br>(0.07,17.03)  |
| 2.74<br>(0.77,9.68)  | 1.87<br>(0.69,5.08)  | 8.21<br>(0.28,241.26)  | 2.14<br>(1.43,3.20)  | 4.95<br>(0.92,26.55)  | 0.63<br>(0.32,1.26) | 3.25<br>(1.24,8.51)  | 2.99<br>(1.11,8.05)  | Placebo             | 0.40<br>(0.17,0.96) | 1.99<br>(1.32,3.01)  | 6.19<br>(1.13,33.92)  | 1.21<br>(0.20,7.39)  | 3.25<br>(0.18,59.35)  |
| 6.79<br>(1.48,31.22) | 4.64<br>(1.28,16.89) | 20.37<br>(0.62,665.90) | 5.30<br>(2.04,13.78) | 12.29<br>(2.91,51.79) | 1.56<br>(0.78,3.14) | 8.07<br>(2.28,28.51) | 7.43<br>(2.06,26.81) | 2.48<br>(1.04,5.90) | Aripiprazole_OS     | 4.94<br>(1.89,12.89) | 15.37<br>(3.55,66.47) | 3.00<br>(0.61,14.70) | 8.07<br>(0.39,164.82) |
| 1.37<br>(0.36,5.19)  | 0.94<br>(0.32,2.77)  | 4.12<br>(0.14,124.21)  | 1.07<br>(0.90,1.28)  | 2.49<br>(0.44,14.01)  | 0.32<br>(0.14,0.71) | 1.63<br>(0.57,4.65)  | 1.50<br>(0.51,4.39)  | 0.50<br>(0.33,0.76) | 0.20<br>(0.08,0.53) | Olanzapine_OS        | 3.11<br>(0.54,17.95)  | 0.61<br>(0.10,3.88)  | 1.63<br>(0.09,30.68)  |
| 0.44<br>(0.05,3.66)  | 0.30<br>(0.04,2.12)  | 1.33<br>(0.03,58.19)   | 0.34<br>(0.06,1.98)  | 0.80<br>(0.61,1.05)   | 0.10<br>(0.02,0.52) | 0.53<br>(0.08,3.62)  | 0.48<br>(0.07,3.38)  | 0.16<br>(0.03,0.88) | 0.07<br>(0.02,0.28) | 0.32<br>(0.06,1.86)  | Risperidone_OS        | 0.20<br>(0.09,0.40)  | 0.53<br>(0.02,15.01)  |
| 2.26<br>(0.25,20.45) | 1.55<br>(0.20,11.97) | 6.78<br>(0.15,312.99)  | 1.77<br>(0.28,11.26) | 4.09<br>(2.09,8.02)   | 0.52<br>(0.09,2.95) | 2.69<br>(0.35,20.43) | 2.47<br>(0.32,19.06) | 0.83<br>(0.14,5.04) | 0.33<br>(0.07,1.63) | 1.65<br>(0.26,10.52) | 5.12<br>(2.48,10.58)  | Quetiapine_OS        | 2.69<br>(0.09,81.27)  |
| 0.84<br>(0.04,18.80) | 0.58<br>(0.04,9.06)  | 2.53<br>(0.03,208.48)  | 0.66<br>(0.04,12.33) | 1.52<br>(0.05,43.08)  | 0.19<br>(0.01,3.77) | 1.00<br>(0.06,15.49) | 0.92<br>(0.06,14.43) | 0.31<br>(0.02,5.61) | 0.12<br>(0.01,2.53) | 0.61<br>(0.03,11.51) | 1.90<br>(0.07,54.45)  | 0.37<br>(0.01,11.26) | Paliperidone_OS       |

Net league table: head-to-head comparisons. Relative risks (RRs) and 95% confidence intervals (CIs) are reported. RRs lower than 1 favour the column-defining treatment. Statistically significant results are highlighted in grey. LAI=long-acting antipsychotics

### Evaluation of heterogeneity and incoherence

#### Overall heterogeneity

Estimated between-studies SD: .10166656

#### Overall incoherence

Design-by-treatment test: P = 0.267

#### Loop-specific approach

- \* 4 triangular loops found
- \* 1 quadratic loops found

Note: Heterogeneity of loop A-E-K cannot be estimated due to insufficient observations - set equal to 0

Note: Heterogeneity of loop A-G-H cannot be estimated due to insufficient observations - set equal to 0

Note: Heterogeneity of loop A-G-J cannot be estimated due to insufficient observations - set equal to 0  
 Note: Heterogeneity of loop A-H-I cannot be estimated due to insufficient observations - set equal to 0  
 Note: Heterogeneity of loop A-B-C-H cannot be estimated due to insufficient observations - set equal to 0

Evaluation of inconsistency using loop-specific heterogeneity estimates:

| Loop    | ROR   | z_value | p_value | CI_95        | Loop_Heterog_tau2 |
|---------|-------|---------|---------|--------------|-------------------|
| A-G-J   | 3.143 | 1.246   | 0.213   | (1.00,19.05) | 0.000             |
| A-G-H   | 1.932 | 0.405   | 0.685   | (1.00,46.71) | 0.000             |
| A-B-C-H | 1.779 | 0.346   | 0.730   | (1.00,46.65) | 0.000             |
| A-E-K   | 1.124 | 0.432   | 0.666   | (1.00,1.91)  | 0.000             |
| A-H-I   | 1.036 | 0.020   | 0.984   | (1.00,30.70) | 0.000             |

Consistency between direct and indirect estimates

| Side  | Direct<br>Coef. | Std. Err. | Indirect<br>Coef. | Std. Err. | Difference<br>Coef. | Std. Err. | P> z  |
|-------|-----------------|-----------|-------------------|-----------|---------------------|-----------|-------|
| A B   | 1.098612        | .7147065  | .6062462          | 1.493529  | .4923661            | 1.655727  | 0.766 |
| A E * | .7887242        | .3015045  | .5553826          | .6791413  | .2333416            | .7029726  | 0.740 |
| A G   | -.496848        | .3664942  | -.0603225         | 1.115641  | -.4365255           | 1.152127  | 0.705 |
| A H   | 1.047533        | .5829216  | 1.500814          | .910273   | -.4532808           | 1.080923  | 0.675 |
| A I   | 1.000815        | 1.632289  | 1.106693          | .5314698  | -.105878            | 1.716633  | 0.951 |
| A J   | -.3378216       | .5210385  | -2.361027         | .8386188  | 2.023205            | .9947117  | 0.042 |
| A K * | .6466934        | .3070424  | .8799768          | .6716491  | -.2332834           | .7029667  | 0.740 |
| B C   | -.0321289       | 1.393049  | -.5241794         | .8956139  | .4920505            | 1.656125  | 0.766 |
| B D * | 1.098612        | 1.599799  | -.915258          | 200.0182  | 2.01387             | 200.0118  | 0.992 |
| C H   | .5571303        | .1562546  | .0654442          | 1.648733  | .491686             | 1.656121  | 0.767 |
| E K   | .               | .         | .                 | .         | .                   | .         | .     |
| F J * | -2.508807       | .734208   | -.8142984         | 48.50962  | -1.694509           | 48.51581  | 0.972 |
| F L * | .2237649        | .1394952  | -2.976601         | 116.4815  | 3.200366            | 116.4815  | 0.978 |
| F M * | -1.408767       | .343269   | -4.608619         | 200.7978  | 3.199852            | 200.7976  | 0.987 |
| G H   | 2.177725        | 1.481171  | 1.542229          | .6328626  | .6354962            | 1.610704  | 0.693 |
| G J * | -.5969863       | .3608871  | 2.324845          | 1.385864  | -2.921831           | 1.412133  | 0.039 |
| H I   | -.0821555       | .1331211  | -.1882026         | 1.711428  | .1060471            | 1.716597  | 0.951 |
| H N * | 2.40e-11        | 1.398135  | -2.358576         | 200.013   | 2.358576            | 200.0082  | 0.991 |

\* Warning: all the evidence about these contrasts comes from the trials which directly compare them.

Funnel plot

Not applicable: no comparisons with 10 one more studies.

## Supplement Z - Secondary outcome: extrapyramidal symptoms

### Treatment codes

|                      |   |
|----------------------|---|
| Placebo              | A |
| Fluphenazine LAI     | B |
| Flupenthixol LAI     | C |
| Haloperidol LAI      | D |
| (Zu)clopenthixol LAI | E |
| Pipothiazine LAI     | F |
| Bromperidol LAI      | G |
| Perphenazine LAI     | H |
| Olanzapine LAI       | I |
| Risperidone LAI      | J |
| Aripiprazole LAI     | K |
| Paliperidone LAI-1   | L |
| Paliperidone LAI-3   | M |
| Phenothiazines OS    | N |
| Haloperidol OS       | O |
| Aripiprazole OS      | P |
| Olanzapine OS        | Q |
| Risperidone OS       | R |
| Quetiapine OS        | S |
| DBP_OS               | T |

### Network map

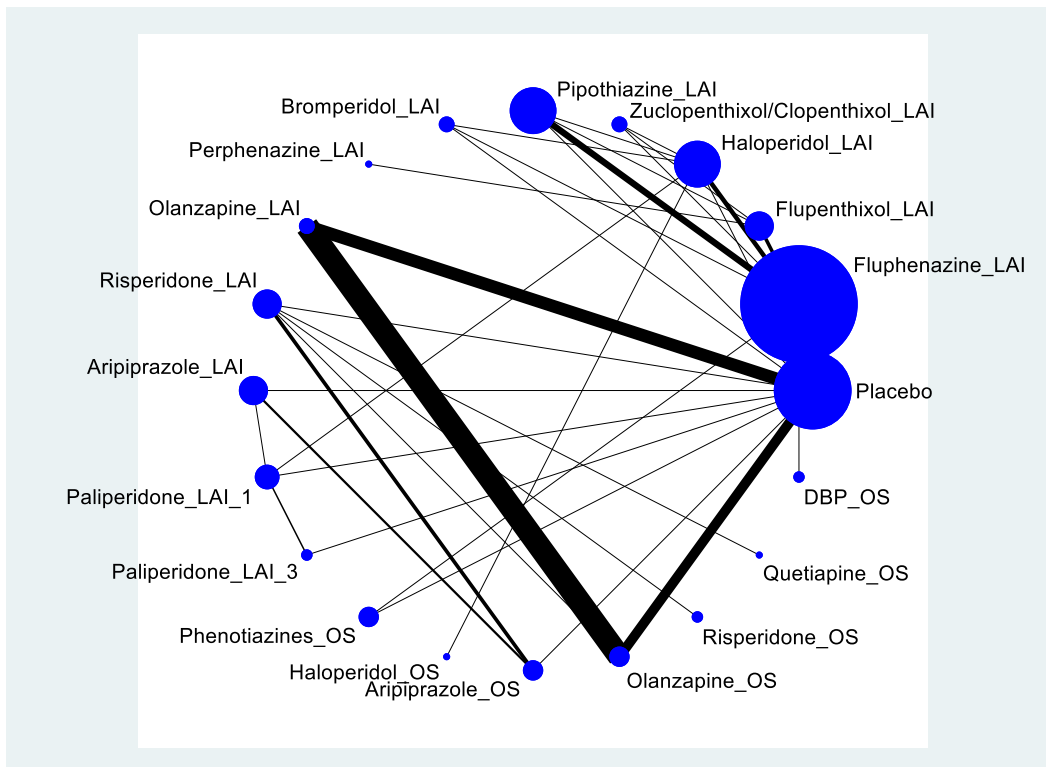

### Pairwise meta-analysis

| Study         | ES    | [95% Conf. Interval] |
|---------------|-------|----------------------|
| -----         |       |                      |
| R - J         |       |                      |
| 2             | 1.100 | 0.573 2.113          |
| 3             | 9.000 | 0.499 162.216        |
| Sub-total     |       |                      |
| D+L pooled ES | 1.925 | 0.312 11.889         |

|               |  |       |       |         |
|---------------|--|-------|-------|---------|
| -----         |  |       |       |         |
| K - A         |  |       |       |         |
| 6             |  | 1.258 | 0.647 | 2.447   |
| 39            |  | 0.934 | 0.406 | 2.148   |
| Sub-total     |  |       |       |         |
| D+L pooled ES |  | 1.120 | 0.666 | 1.884   |
| -----         |  |       |       |         |
| P - A         |  |       |       |         |
| 6             |  | 0.806 | 0.392 | 1.656   |
| Sub-total     |  |       |       |         |
| D+L pooled ES |  | 0.806 | 0.392 | 1.656   |
| -----         |  |       |       |         |
| P - K         |  |       |       |         |
| 6             |  | 0.640 | 0.363 | 1.129   |
| 7             |  | 0.869 | 0.562 | 1.343   |
| Sub-total     |  |       |       |         |
| D+L pooled ES |  | 0.776 | 0.549 | 1.096   |
| -----         |  |       |       |         |
| I - A         |  |       |       |         |
| 8             |  | 1.168 | 1.009 | 1.352   |
| Sub-total     |  |       |       |         |
| D+L pooled ES |  | 1.168 | 1.009 | 1.352   |
| -----         |  |       |       |         |
| Q - A         |  |       |       |         |
| 8             |  | 0.968 | 0.820 | 1.143   |
| Sub-total     |  |       |       |         |
| D+L pooled ES |  | 0.968 | 0.820 | 1.143   |
| -----         |  |       |       |         |
| Q - I         |  |       |       |         |
| 8             |  | 0.829 | 0.743 | 0.924   |
| 9             |  | 0.391 | 0.141 | 1.080   |
| Sub-total     |  |       |       |         |
| D+L pooled ES |  | 0.679 | 0.354 | 1.302   |
| -----         |  |       |       |         |
| O - D         |  |       |       |         |
| 10            |  | 0.333 | 0.041 | 2.731   |
| Sub-total     |  |       |       |         |
| D+L pooled ES |  | 0.333 | 0.041 | 2.731   |
| -----         |  |       |       |         |
| N - B         |  |       |       |         |
| 11            |  | 0.034 | 0.002 | 0.590   |
| 12            |  | 0.049 | 0.003 | 0.801   |
| 13            |  | 0.220 | 0.011 | 4.467   |
| Sub-total     |  |       |       |         |
| D+L pooled ES |  | 0.068 | 0.013 | 0.361   |
| -----         |  |       |       |         |
| B - A         |  |       |       |         |
| 12            |  | 5.431 | 1.055 | 27.963  |
| 37            |  | 0.740 | 0.421 | 1.302   |
| 38            |  | 1.500 | 0.731 | 3.076   |
| 41            |  | 3.000 | 0.328 | 27.461  |
| 76            |  | 9.806 | 0.609 | 157.925 |
| Sub-total     |  |       |       |         |
| D+L pooled ES |  | 1.754 | 0.778 | 3.955   |
| -----         |  |       |       |         |
| N - A         |  |       |       |         |
| 12            |  | 0.264 | 0.011 | 6.191   |
| Sub-total     |  |       |       |         |
| D+L pooled ES |  | 0.264 | 0.011 | 6.191   |
| -----         |  |       |       |         |
| S - J         |  |       |       |         |
| 17            |  | 0.559 | 0.325 | 0.961   |
| Sub-total     |  |       |       |         |
| D+L pooled ES |  | 0.559 | 0.325 | 0.961   |
| -----         |  |       |       |         |
| P - J         |  |       |       |         |
| 18            |  | 0.862 | 0.658 | 1.129   |
| Sub-total     |  |       |       |         |
| D+L pooled ES |  | 0.862 | 0.658 | 1.129   |
| -----         |  |       |       |         |
| F - C         |  |       |       |         |
| 20            |  | 0.708 | 0.015 | 33.972  |
| Sub-total     |  |       |       |         |
| D+L pooled ES |  | 0.708 | 0.015 | 33.972  |
| -----         |  |       |       |         |
| C - B         |  |       |       |         |
| 21            |  | 0.875 | 0.526 | 1.455   |
| 66            |  | 0.692 | 0.421 | 1.138   |

|       |               |       |       |       |
|-------|---------------|-------|-------|-------|
| 78    |               | 0.638 | 0.411 | 0.988 |
|       | Sub-total     |       |       |       |
|       | D+L pooled ES | 0.718 | 0.545 | 0.946 |
| ----- |               |       |       |       |
|       | L - K         |       |       |       |
| 23    |               | 0.755 | 0.269 | 2.123 |
| 24    |               | 0.196 | 0.010 | 3.986 |
|       | Sub-total     |       |       |       |
|       | D+L pooled ES | 0.655 | 0.246 | 1.741 |
| ----- |               |       |       |       |
|       | J - A         |       |       |       |
| 29    |               | 0.487 | 0.226 | 1.048 |
|       | Sub-total     |       |       |       |
|       | D+L pooled ES | 0.487 | 0.226 | 1.048 |
| ----- |               |       |       |       |
|       | G - A         |       |       |       |
| 30    |               | 0.500 | 0.117 | 2.139 |
|       | Sub-total     |       |       |       |
|       | D+L pooled ES | 0.500 | 0.117 | 2.139 |
| ----- |               |       |       |       |
|       | D - A         |       |       |       |
| 31    |               | 1.333 | 0.599 | 2.968 |
|       | Sub-total     |       |       |       |
|       | D+L pooled ES | 1.333 | 0.599 | 2.968 |
| ----- |               |       |       |       |
|       | M - A         |       |       |       |
| 34    |               | 2.356 | 0.861 | 6.448 |
|       | Sub-total     |       |       |       |
|       | D+L pooled ES | 2.356 | 0.861 | 6.448 |
| ----- |               |       |       |       |
|       | T - B         |       |       |       |
| 43    |               | 1.412 | 0.619 | 3.222 |
| 44    |               | 2.143 | 0.825 | 5.563 |
|       | Sub-total     |       |       |       |
|       | D+L pooled ES | 1.688 | 0.904 | 3.151 |
| ----- |               |       |       |       |
|       | D - B         |       |       |       |
| 46    |               | 0.582 | 0.308 | 1.101 |
| 60    |               | 1.079 | 0.778 | 1.497 |
| 72    |               | 0.889 | 0.474 | 1.666 |
| 74    |               | 0.690 | 0.367 | 1.298 |
|       | Sub-total     |       |       |       |
|       | D+L pooled ES | 0.867 | 0.653 | 1.152 |
| ----- |               |       |       |       |
|       | Q - J         |       |       |       |
| 48    |               | 0.750 | 0.318 | 1.769 |
|       | Sub-total     |       |       |       |
|       | D+L pooled ES | 0.750 | 0.318 | 1.769 |
| ----- |               |       |       |       |
|       | L - D         |       |       |       |
| 49    |               | 0.262 | 0.089 | 0.770 |
|       | Sub-total     |       |       |       |
|       | D+L pooled ES | 0.262 | 0.089 | 0.770 |
| ----- |               |       |       |       |
|       | F - D         |       |       |       |
| 50    |               | 1.225 | 0.497 | 3.020 |
|       | Sub-total     |       |       |       |
|       | D+L pooled ES | 1.225 | 0.497 | 3.020 |
| ----- |               |       |       |       |
|       | F - B         |       |       |       |
| 51    |               | 1.125 | 0.502 | 2.521 |
| 53    |               | 0.836 | 0.626 | 1.117 |
| 64    |               | 1.436 | 0.925 | 2.228 |
| 68    |               | 0.667 | 0.128 | 3.470 |
| 71    |               | 1.375 | 0.567 | 3.336 |
| 75    |               | 0.600 | 0.293 | 1.227 |
| 76    |               | 0.895 | 0.410 | 1.952 |
|       | Sub-total     |       |       |       |
|       | D+L pooled ES | 0.970 | 0.768 | 1.226 |
| ----- |               |       |       |       |
|       | L - A         |       |       |       |
| 54    |               | 0.518 | 0.096 | 2.791 |
|       | Sub-total     |       |       |       |
|       | D+L pooled ES | 0.518 | 0.096 | 2.791 |
| ----- |               |       |       |       |
|       | G - B         |       |       |       |
| 56    |               | 0.667 | 0.129 | 3.436 |
|       | Sub-total     |       |       |       |



|               |  |       |       |         |
|---------------|--|-------|-------|---------|
| D+L pooled ES |  | 0.667 | 0.129 | 3.436   |
| -----         |  |       |       |         |
| G - D         |  |       |       |         |
| 57            |  | 0.250 | 0.034 | 1.863   |
| Sub-total     |  |       |       |         |
| D+L pooled ES |  | 0.250 | 0.034 | 1.863   |
| -----         |  |       |       |         |
| M - L         |  |       |       |         |
| 59            |  | 1.123 | 0.737 | 1.711   |
| Sub-total     |  |       |       |         |
| D+L pooled ES |  | 1.123 | 0.737 | 1.711   |
| -----         |  |       |       |         |
| E - D         |  |       |       |         |
| 63            |  | 1.200 | 0.215 | 6.693   |
| Sub-total     |  |       |       |         |
| D+L pooled ES |  | 1.200 | 0.215 | 6.693   |
| -----         |  |       |       |         |
| E - C         |  |       |       |         |
| 65            |  | 1.000 | 0.462 | 2.166   |
| Sub-total     |  |       |       |         |
| D+L pooled ES |  | 1.000 | 0.462 | 2.166   |
| -----         |  |       |       |         |
| H - C         |  |       |       |         |
| 69            |  | 0.500 | 0.050 | 4.978   |
| Sub-total     |  |       |       |         |
| D+L pooled ES |  | 0.500 | 0.050 | 4.978   |
| -----         |  |       |       |         |
| F - A         |  |       |       |         |
| 76            |  | 8.774 | 0.540 | 142.514 |
| Sub-total     |  |       |       |         |
| D+L pooled ES |  | 8.774 | 0.540 | 142.514 |
| -----         |  |       |       |         |
| E - B         |  |       |       |         |
| 77            |  | 1.474 | 0.564 | 3.851   |
| Sub-total     |  |       |       |         |
| D+L pooled ES |  | 1.474 | 0.564 | 3.851   |
| -----         |  |       |       |         |

Test(s) of heterogeneity:

|       | Heterogeneity<br>statistic | degrees of<br>freedom | P     | I-squared** | Tau-squared |
|-------|----------------------------|-----------------------|-------|-------------|-------------|
| R - J | 1.93                       | 1                     | 0.165 | 48.2%       | 1.0652      |
| K - A | 0.30                       | 1                     | 0.584 | 0.0%        | 0.0000      |
| P - A | 0.00                       | 0                     | .     | .%          | 0.0000      |
| P - K | 0.70                       | 1                     | 0.404 | 0.0%        | 0.0000      |
| I - A | 0.00                       | 0                     | .     | .%          | 0.0000      |
| Q - A | 0.00                       | 0                     | .     | .%          | 0.0000      |
| Q - I | 2.08                       | 1                     | 0.149 | 51.9%       | 0.1469      |
| O - D | 0.00                       | 0                     | .     | .%          | 0.0000      |
| N - B | 0.86                       | 2                     | 0.652 | 0.0%        | 0.0000      |
| B - A | 9.29                       | 4                     | 0.054 | 56.9%       | 0.4057      |
| N - A | 0.00                       | 0                     | .     | .%          | 0.0000      |
| S - J | 0.00                       | 0                     | .     | .%          | 0.0000      |
| P - J | 0.00                       | 0                     | .     | .%          | 0.0000      |
| F - C | 0.00                       | 0                     | .     | .%          | 0.0000      |
| C - B | 0.88                       | 2                     | 0.643 | 0.0%        | 0.0000      |
| L - K | 0.69                       | 1                     | 0.407 | 0.0%        | 0.0000      |
| J - A | 0.00                       | 0                     | .     | .%          | 0.0000      |
| G - A | 0.00                       | 0                     | .     | .%          | 0.0000      |
| D - A | 0.00                       | 0                     | .     | .%          | 0.0000      |
| M - A | 0.00                       | 0                     | .     | .%          | 0.0000      |
| T - B | 0.42                       | 1                     | 0.517 | 0.0%        | 0.0000      |
| D - B | 3.66                       | 3                     | 0.300 | 18.1%       | 0.0163      |
| Q - J | 0.00                       | 0                     | .     | .%          | 0.0000      |
| L - D | 0.00                       | 0                     | .     | .%          | 0.0000      |
| F - D | 0.00                       | 0                     | .     | .%          | 0.0000      |
| F - B | 6.75                       | 6                     | 0.345 | 11.1%       | 0.0119      |
| L - A | 0.00                       | 0                     | .     | .%          | 0.0000      |
| G - B | 0.00                       | 0                     | .     | .%          | 0.0000      |
| G - D | 0.00                       | 0                     | .     | .%          | 0.0000      |
| M - L | 0.00                       | 0                     | .     | .%          | 0.0000      |
| E - D | 0.00                       | 0                     | .     | .%          | 0.0000      |
| E - C | 0.00                       | 0                     | .     | .%          | 0.0000      |
| H - C | 0.00                       | 0                     | .     | .%          | 0.0000      |
| F - A | 0.00                       | 0                     | .     | .%          | 0.0000      |
| E - B | 0.00                       | 0                     | .     | .%          | 0.0000      |

\*\* I-squared: the variation in ES attributable to heterogeneity)

**Net league table**

|                    |                    |                    |                    |                    |                   |                   |                       |                   |                   |                   |                   |                   |                   |                   |                  |                  |                  |                     |
|--------------------|--------------------|--------------------|--------------------|--------------------|-------------------|-------------------|-----------------------|-------------------|-------------------|-------------------|-------------------|-------------------|-------------------|-------------------|------------------|------------------|------------------|---------------------|
| Fluphenazine_L AI  | 0.76 (0.55,1.06)   | 0.90 (0.68,1.20)   | 1.01 (0.53,1.90)   | 0.99 (0.76,1.29)   | 0.39 (0.14,1.07)  | 0.38 (0.04,0.97)  | 0.82 (0.47,1.42)      | 0.57 (0.30,1.09)  | 0.70 (0.38,1.29)  | 0.49 (0.24,1.01)  | 0.70 (0.32,1.50)  | 0.07 (0.01,0.39)  | 0.30 (0.04,0.59)  | 0.52 (0.28,0.98)  | 0.61 (0.34,1.11) | 0.71 (0.27,1.86) | 0.32 (0.13,0.80) | 1.69 (0.87,3.32)    |
| 1.32 (0.95,1.83)   | Flupentixol_LAI    | 1.19 (0.77,1.84)   | 1.32 (0.70,2.49)   | 1.31 (0.86,1.98)   | 0.52 (0.18,1.11)  | 0.50 (0.05,1.11)  | 1.08 (0.57,2.05)      | 0.75 (0.36,1.57)  | 0.93 (0.46,1.86)  | 0.65 (0.30,1.43)  | 0.92 (0.40,2.11)  | 0.92 (0.54,1.57)  | 0.40 (0.05,0.93)  | 0.69 (0.34,1.40)  | 0.81 (0.40,1.60) | 0.94 (0.34,2.62) | 0.42 (0.16,1.12) | 2.23 (1.06,4.72)    |
| 1.11 (0.83,1.47)   | 0.84 (0.54,1.30)   | Haloperidol_LAI    | 1.11 (0.56,2.20)   | 1.10 (0.76,1.59)   | 0.44 (0.16,1.20)  | 0.42 (0.04,0.47)  | 0.91 (0.51,1.60)      | 0.63 (0.33,1.22)  | 0.78 (0.42,1.45)  | 0.55 (0.27,1.10)  | 0.77 (0.36,1.66)  | 0.77 (0.50,1.20)  | 0.08 (0.01,0.44)  | 0.33 (0.04,0.81)  | 0.58 (0.30,1.10) | 0.68 (0.37,1.24) | 0.79 (0.30,2.08) | 1.88 (0.90,3.89)    |
| 0.99 (0.53,1.88)   | 0.75 (0.40,1.42)   | 0.90 (0.45,1.78)   | Zuclopenthixol_LAI | 0.99 (0.50,1.96)   | 0.39 (0.12,1.28)  | 0.38 (0.03,0.20)  | 0.81 (0.35,1.89)      | 0.57 (0.23,1.41)  | 0.70 (0.29,1.69)  | 0.49 (0.19,1.28)  | 0.69 (0.26,1.87)  | 0.69 (0.33,1.49)  | 0.07 (0.01,0.43)  | 0.30 (0.03,0.81)  | 0.52 (0.21,2.7)  | 0.61 (0.25,4.6)  | 0.71 (0.22,2.24) | 1.69 (0.67,4.52)    |
| 1.01 (0.78,1.31)   | 0.77 (0.50,1.16)   | 0.91 (0.63,1.32)   | 1.01 (0.51,2.0)    | Pipothiazine_LAI   | 0.40 (0.14,1.12)  | 0.38 (0.04,0.6)   | 0.83 (0.45,1.51)      | 0.58 (0.29,1.16)  | 0.71 (0.37,1.37)  | 0.50 (0.23,1.0)   | 0.70 (0.31,1.56)  | 0.71 (0.43,1.15)  | 0.07 (0.01,0.40)  | 0.30 (0.03,0.65)  | 0.53 (0.27,1.04) | 0.62 (0.32,1.18) | 0.72 (0.27,1.94) | 1.71 (0.83,3.52)    |
| 2.54 (0.93,6.90)   | 1.93 (0.67,5.53)   | 2.29 (0.84,6.29)   | 2.55 (0.78,8.34)   | 2.52 (0.90,7.06)   | Bromperidol_LAI   | 0.96 (0.08,12.37) | 2.08 (0.71,6.05)      | 1.45 (0.47,4.44)  | 1.79 (0.59,5.38)  | 1.26 (0.39,4.5)   | 1.77 (0.53,5.92)  | 1.77 (0.85,2.9)   | 0.18 (0.03,0.29)  | 0.76 (0.07,8.03)  | 1.33 (0.44,5.9)  | 1.55 (0.53,4.82) | 1.81 (0.82,95)   | 4.30 (1.29,14.36)   |
| 2.64 (0.25,27.57)  | 2.00 (0.20,20.45)  | 2.38 (0.22,25.33)  | 2.65 (0.24,29.07)  | 2.61 (0.25,27.70)  | 1.04 (0.08,1.332) | Perphenazine_LAI  | 2.16 (0.19,24.06)     | 1.50 (0.13,17.22) | 1.86 (0.16,21.00) | 1.30 (0.11,15.69) | 1.84 (0.16,21.99) | 1.84 (0.17,1.42)  | 0.19 (0.01,3.99)  | 0.79 (0.03,9.16)  | 1.38 (0.12,5.66) | 1.61 (0.14,8.19) | 1.88 (0.15,3.76) | 4.47 (0.39,51.9)    |
| 1.22 (0.71,2.11)   | 0.93 (0.49,1.77)   | 1.10 (0.62,1.95)   | 1.23 (0.53,2.8)    | 1.21 (0.66,2.22)   | 0.48 (0.17,1.40)  | Olanzapine_LAI    | 0.46 (0.04,5.17)      | 0.70 (0.39,1.25)  | 0.86 (0.48,1.53)  | 0.60 (0.29,1.2)   | 0.85 (0.39,1.8)   | 0.85 (0.51,2.3)   | 0.09 (0.02,0.35)  | 0.37 (0.04,3.14)  | 0.64 (0.36,1.09) | 0.75 (0.51,0.9)  | 0.87 (0.35,2.19) | 2.07 (0.16,6.93)    |
| 1.75 (0.91,3.6)    | 1.33 (0.64,2.78)   | 1.58 (0.82,3.07)   | 1.76 (0.71,4.3)    | 1.74 (0.86,3.50)   | 0.69 (0.22,1.2)   | Risperidone_LAI   | 1.43 (0.80,2.58)      | 1.24 (0.74,2.07)  | 0.87 (0.41,1.82)  | 1.22 (0.53,2.8)   | 1.22 (0.75,2.01)  | 0.13 (0.02,0.76)  | 0.53 (0.06,4.92)  | 0.92 (0.61,1.36)  | 1.07 (0.62,1.86) | 1.25 (0.61,2.8)  | 0.56 (0.29,1.06) | 2.97 (1.16,7.53)    |
| 1.42 (0.77,2.60)   | 1.08 (0.54,2.16)   | 1.28 (0.69,2.39)   | 1.43 (0.59,3.4)    | 1.41 (0.73,2.72)   | 0.56 (0.19,1.68)  | 0.54 (0.05,0.9)   | 1.16 (0.65,2.07)      | 0.81 (0.48,1.35)  | 0.70 (0.35,1.42)  | 0.99 (0.46,2.13)  | 0.99 (0.57,1.7)   | 0.10 (0.02,0.61)  | 0.43 (0.05,3.94)  | 0.74 (0.50,1.10)  | 0.87 (0.49,1.55) | 1.01 (0.42,4.4)  | 1.02 (0.20,4.03) | 2.41 (0.97,5.95)    |
| 2.02 (0.99,4.11)   | 1.53 (0.70,3.7)    | 1.83 (0.91,3.68)   | 2.03 (0.78,5.2)    | 2.00 (0.94,4.26)   | 0.80 (0.25,2.56)  | 0.77 (0.07,8.44)  | 1.65 (0.79,3.4)       | 1.15 (0.54,2.46)  | 1.42 (0.72,2.82)  | Paliperidone_LAI  | 1.41 (0.84,2.3)   | 1.41 (0.75,2.9)   | 0.15 (0.02,0.90)  | 0.61 (0.06,5.1)   | 1.06 (0.51,1.9)  | 1.24 (0.59,2.7)  | 1.44 (0.91,2.4)  | 3.42 (1.29,9.1)     |
| 1.43 (0.67,3.08)   | 1.09 (0.47,2.50)   | 1.30 (0.60,2.79)   | 1.44 (0.54,3.8)    | 1.42 (0.64,3.18)   | 0.56 (0.17,1.89)  | 0.54 (0.05,0.43)  | 1.17 (0.53,2.59)      | 0.82 (0.35,1.89)  | 1.01 (0.47,2.18)  | Paliperidone_LAI  | 1.00 (0.42,1.0)   | 1.00 (0.49,2.03)  | 0.10 (0.02,0.65)  | 0.43 (0.04,1.7)   | 0.75 (0.68,0.98) | 0.88 (0.39,1.98) | 1.02 (0.34,3.06) | 2.43 (0.88,6.73)    |
| 1.43 (0.95,2.16)   | 1.09 (0.64,1.85)   | 1.29 (0.83,2.01)   | 1.44 (0.67,3.0)    | 1.42 (0.87,2.31)   | 0.56 (0.21,1.54)  | 0.54 (0.05,0.90)  | 1.17 (0.81,1.69)      | 0.82 (0.50,1.34)  | 1.01 (0.64,1.60)  | 0.71 (0.37,1.34)  | 1.00 (0.49,2.0)   | Placebo           | 0.10 (0.02,0.58)  | 0.43 (0.05,3.80)  | 0.75 (0.46,2.1)  | 0.87 (0.59,1.29) | 1.02 (0.43,4.03) | 2.43 (1.10,5.34)    |
| 13.77 (2.58,73.40) | 10.45 (1.90,57.52) | 12.44 (2.28,67.88) | 13.85 (2.31,82.93) | 13.64 (2.51,74.18) | 5.42 (0.77,38.03) | 5.23 (0.29,93.39) | 7.86 (1.94,65.34)     | 9.70 (1.31,47.19) | 14.2 (1.64,57.33) | 6.82 (1.11,41.90) | 9.60 (1.53,60.24) | 9.62 (1.72,53.74) | Phenothiazines_OS | 4.15 (0.27,6.326) | 7.19 (1.21,2.84) | 8.42 (1.43,9.57) | 9.82 (1.43,7.37) | 23.34 (3.85,149.50) |
| 3.32 (0.39,28.52)  | 2.52 (0.29,22.20)  | 3.00 (0.36,25.29)  | 3.34 (0.36,31.32)  | 3.29 (0.38,28.64)  | 1.31 (0.12,1.383) | 1.26 (0.05,30.42) | 2.72 (0.20,30.247.66) | 1.89 (0.20,1.55)  | 2.34 (0.25,50)    | 1.64 (0.17,15.31) | 2.32 (0.24,22.46) | 0.24 (0.02,3.68)  | Haloperidol_OS    | 1.73 (0.19,6.07)  | 2.03 (0.22,8.60) | 2.37 (0.23,4.62) | 1.06 (0.10,1.81) | 5.63 (0.59,53.56)   |
| 1.91 (1.02,3.58)   | 1.45 (0.71,2.96)   | 1.73 (0.91,3.28)   | 1.92 (0.79,4.7)    | 1.90 (0.96,3.74)   | 0.75 (0.25,2.29)  | 0.73 (0.06,8.26)  | 1.57 (0.87,2.80)      | 1.09 (0.73,1.63)  | 1.35 (0.91,2.01)  | 0.95 (0.46,1.99)  | 1.33 (0.60,2.99)  | 1.34 (0.83,2.16)  | 0.14 (0.02,0.83)  | 0.58 (0.06,5.34)  | Aripiprazole_OS  | 1.17 (0.66,2.08) | 1.62 (0.60,3.09) | 3.24 (1.29,8.130)   |
| 1.64 (0.90,2.96)   | 1.24 (0.62,2.47)   | 1.48 (0.81,2.70)   | 1.64 (0.69,3.95)   | 1.62 (0.85,3.11)   | 0.64 (0.22,1.90)  | 0.62 (0.05,0.01)  | 1.34 (0.92,1.95)      | 0.93 (0.54,1.62)  | 1.15 (0.65,2.06)  | 0.81 (0.39,1.68)  | 1.14 (0.50,2.58)  | 1.14 (0.78,1.68)  | 0.12 (0.02,0.70)  | 0.49 (0.05,4.52)  | 0.85 (0.48,1.52) | Olanzapine_OS    | 1.17 (0.47,2.90) | 2.77 (1.13,6.77)    |
| 1.40 (0.54,3.66)   | 1.06 (0.38,2.95)   | 1.27 (0.48,3.4)    | 1.41 (0.45,4.4)    | 1.39 (0.51,3.75)   | 0.55 (0.15,2.08)  | 0.53 (0.04,0.08)  | 1.15 (0.46,2.89)      | 0.80 (0.39,1.64)  | 0.99 (0.41,2.38)  | 0.69 (0.24,1.97)  | 0.98 (0.33,2.92)  | 0.98 (0.41,2.33)  | 0.10 (0.01,0.70)  | 0.42 (0.04,4.66)  | 0.73 (0.32,1.13) | 0.86 (0.34,2.13) | Risperidone_OS   | 0.45 (0.17,1.8)     |
| 3.14 (1.26,7.84)   | 2.38 (0.89,6.33)   | 2.83 (1.12,7.14)   | 3.15 (1.03,9.6)    | 3.11 (1.20,8.06)   | 1.24 (0.34,4.50)  | 1.19 (0.10,14.83) | 2.57 (1.07,6.13)      | 1.79 (0.94,3.41)  | 2.21 (0.97,5.04)  | 1.55 (0.57,4.2)   | 2.19 (0.76,6.2)   | 2.19 (0.97,4.94)  | 0.23 (0.03,1.53)  | 0.94 (0.09,9.65)  | 1.64 (0.77,3.50) | 1.92 (0.82,4.48) | 2.24 (0.85,5.88) | 5.32 (1.71,16.58)   |
| 0.59 (0.30,1.16)   | 0.45 (0.21,0.95)   | 0.53 (0.26,1.11)   | 0.59 (0.24,1.50)   | 0.58 (0.28,1.20)   | 0.23 (0.07,0.78)  | 0.22 (0.02,2.57)  | 0.48 (0.20,1.15)      | 0.34 (0.13,0.86)  | 0.42 (0.17,1.03)  | 0.29 (0.11,0.78)  | 0.41 (0.15,1.14)  | 0.41 (0.19,0.91)  | 0.04 (0.01,0.26)  | 0.18 (0.02,0.69)  | 0.36 (0.12,0.77) | 0.42 (0.15,0.89) | 0.19 (0.13,0.36) | DBP_OS              |

Net league table: head-to-head comparisons. Relative risks (RRs) and 95% confidence intervals (CIs) are reported. RRs lower than 1 favour the column-defining treatment. Statistically significant results are highlighted in grey. LAI=long-acting antipsychotics

**Evaluation of heterogeneity and incoherence**

Overall heterogeneity

Estimated between-studies SD: .17808443

Overall incoherence

Design-by-treatment test: P = 0.128

Loop-specific approach

\* 18 triangular loops found

\* 1 quadratic loops found

- Note: Heterogeneity of loop A-D-F cannot be estimated due to insufficient observations - set equal to 0
- Note: Heterogeneity of loop A-D-G cannot be estimated due to insufficient observations - set equal to 0
- Note: Heterogeneity of loop A-D-L cannot be estimated due to insufficient observations - set equal to 0
- Note: Heterogeneity of loop A-I-Q cannot be estimated due to insufficient observations - set equal to 0
- Note: Heterogeneity of loop A-J-P cannot be estimated due to insufficient observations - set equal to 0
- Note: Heterogeneity of loop A-J-Q cannot be estimated due to insufficient observations - set equal to 0
- Note: Heterogeneity of loop A-K-P cannot be estimated due to insufficient observations - set equal to 0
- Note: Heterogeneity of loop A-L-M cannot be estimated due to insufficient observations - set equal to 0
- Note: Heterogeneity of loop C-D-E-F cannot be estimated due to insufficient observations - set equal to 0

Evaluation of inconsistency using loop-specific heterogeneity estimates:

| Loop    | ROR   | z_value | p_value | CI_95         | Loop_Heterog_tau2 |
|---------|-------|---------|---------|---------------|-------------------|
| A-B-F   | 6.313 | 1.197   | 0.231   | (1.00,128.99) | 0.103             |
| A-D-F   | 5.372 | 1.085   | 0.278   | (1.00,112.00) | 0.000             |
| A-L-M   | 4.049 | 1.366   | 0.172   | (1.00,30.11)  | 0.000             |
| A-B-N   | 3.131 | 0.602   | 0.547   | (1.00,128.58) | 0.134             |
| B-D-G   | 3.075 | 0.837   | 0.403   | (1.00,42.76)  | 0.016             |
| A-J-Q   | 2.652 | 1.644   | 0.100   | (1.00,8.48)   | 0.000             |
| A-B-G   | 2.339 | 0.560   | 0.575   | (1.00,45.73)  | 0.406             |
| A-I-Q   | 2.122 | 1.417   | 0.157   | (1.00,6.01)   | 0.000             |
| B-C-E   | 2.053 | 1.116   | 0.265   | (1.00,7.26)   | 0.000             |
| A-J-P   | 1.921 | 1.178   | 0.239   | (1.00,5.69)   | 0.000             |
| B-C-F   | 1.885 | 0.320   | 0.749   | (1.00,91.80)  | 0.000             |
| A-D-G   | 1.500 | 0.305   | 0.760   | (1.00,20.30)  | 0.000             |
| A-D-L   | 1.486 | 0.360   | 0.719   | (1.00,12.82)  | 0.000             |
| C-D-E-F | 1.441 | 0.163   | 0.871   | (1.00,117.19) | 0.000             |
| B-D-E   | 1.416 | 0.338   | 0.736   | (1.00,10.68)  | 0.016             |
| A-K-L   | 1.416 | 0.338   | 0.735   | (1.00,10.62)  | 0.000             |
| A-K-P   | 1.208 | 0.374   | 0.709   | (1.00,3.25)   | 0.000             |
| A-B-D   | 1.149 | 0.205   | 0.838   | (1.00,4.34)   | 0.111             |
| B-D-F   | 1.098 | 0.183   | 0.854   | (1.00,2.99)   | 0.014             |

Consistency between direct and indirect estimates

| Side  | Direct<br>Coef. | Std. Err.       | Indirect<br>Coef. | Std. Err.       | Difference<br>Coef. | Std. Err.       | P> z         |
|-------|-----------------|-----------------|-------------------|-----------------|---------------------|-----------------|--------------|
| A B   | .2598831        | .2414782        | .5910687          | .3493711        | -.3311856           | .4019155        | 0.410        |
| A D   | .2876821        | .4494697        | .2516341          | .2640797        | .0360479            | .5213071        | 0.945        |
| A F   | .6348033        | .8325573        | .337146           | .2556762        | .2976573            | .8431714        | 0.724        |
| A G   | -.6931472       | .7636633        | -.4732732         | .6935497        | -.219874            | 1.031597        | 0.831        |
| A I   | .1479375        | .2029793        | .327562           | .7851822        | -.1796246           | .8109372        | 0.825        |
| A J   | -.7199944       | .4220253        | .0615967          | .2958806        | -.7815911           | .5154132        | 0.129        |
| A K   | .1137312        | .2945449        | -.1788793         | .3912809        | .2926105            | .4852274        | 0.546        |
| A L   | -.6572152       | .8777506        | -.2956354         | .3502404        | -.3615797           | .9450473        | 0.702        |
| A M   | <b>.8570714</b> | <b>.5338598</b> | <b>-.6573238</b>  | <b>.4573341</b> | <b>1.514395</b>     | <b>.7029657</b> | <b>0.031</b> |
| A N   | -.7007333       | 1.477467        | -2.728833         | .9432448        | 2.028099            | 1.541438        | 0.188        |
| A P   | -.2465881       | .4134842        | -.3170619         | .3115923        | .0704738            | .5157134        | 0.891        |
| A Q   | -.031016        | .1909374        | -.791347          | .4953067        | .7603311            | .5299247        | 0.151        |
| B C   | -.3264736       | .173856         | .3140874          | .5957397        | -.640561            | .6206357        | 0.302        |
| B D   | -.163404        | .1660428        | .1179752          | .311093         | -.2813792           | .3502413        | 0.422        |
| B E   | .3877621        | .5212115        | -.2367984         | .4145996        | .6245605            | .6660004        | 0.348        |
| B F   | -.0235686       | .1396133        | .1756574          | .4947558        | -.199226            | .5141367        | 0.698        |
| B G   | -.4054686       | .8564702        | -1.22333          | .6366636        | .8178617            | 1.067181        | 0.443        |
| B N * | -2.681323       | .8535579        | .1258496          | 1.916822        | -2.807173           | 1.752649        | 0.109        |
| B T * | .5274441        | .3428551        | -.747486          | 53.9842         | 1.27493             | 53.98606        | 0.981        |
| C E   | -6.71e-13       | .4318636        | .6334731          | .4838398        | -.6334731           | .6485423        | 0.329        |
| C F   | -.3448404       | 1.982777        | .2735538          | .2145598        | -.6183942           | 1.994352        | 0.757        |
| C H * | -.6931472       | 1.186039        | -.2831689         | 196.6633        | -.4099783           | 196.6643        | 0.998        |
| D E   | .1823193        | .8955068        | .0946795          | .3796944        | .0876398            | .9726773        | 0.928        |
| D F   | .202939         | .4965173        | .0758462          | .2068705        | .1270928            | .5378893        | 0.813        |
| D G   | -1.386277       | 1.040214        | -.6502637         | .5925936        | -.7360134           | 1.197154        | 0.539        |
| D L   | -1.341047       | .5721301        | -.149527          | .4407139        | -1.19152            | .7221918        | 0.099        |
| D O * | -1.098612       | 1.087752        | -.801724          | 134.179         | -.2968883           | 134.1785        | 0.998        |
| I Q * | -.2679833       | .1913616        | -1.363261         | 1.16486         | 1.095277            | 1.176846        | 0.352        |
| J P   | -.1488906       | .2361995        | .159333           | .4588645        | -.3082236           | .516088         | 0.550        |
| J Q   | -.2876842       | .4739585        | .2599984          | .3487449        | -.5476827           | .5884387        | 0.352        |
| J R * | .2227986        | .3671433        | .4392355          | 71.44435        | -.2164369           | 71.44549        | 0.998        |
| J S * | -.5819215       | .3287834        | .3218195          | 223.0607        | -.903741            | 223.0609        | 0.997        |
| K L   | -.436346        | .5257724        | -.2900166         | .4689777        | -.1463294           | .7039753        | 0.835        |
| K P   | -.2731614       | .2241174        | -.4709262         | .5581101        | .1977649            | .6009599        | 0.742        |
| L M   | <b>.1158318</b> | <b>.2596494</b> | <b>1.630238</b>   | <b>.6532573</b> | <b>-1.514406</b>    | <b>.7029672</b> | <b>0.031</b> |

\* Warning: all the evidence about these contrasts comes from the trials which directly compare them.

**Funnel plot**

Not applicable: no comparisons with 10 or more studies.
